# Supplementary material for: Analysis of an Ordered, Comprehensive STM Mutant Library in Infectious Borrelia burgdorferi: Insights into the Genes Required for Mouse Infectivity
Source: PLoS One. 2012 Oct 25;7(10):e47532. doi: 10.1371/journal.pone.0047532 (PMC3485029; doi:10.1371/journal.pone.0047532)
Supplement: Spreadsheet S1 — Transposon insertion sites in 4,479 clones derived by electroporation of B. burgdorferi 5A18NP1 with the Himar1 suicide vector pGKT. (XLS) [file pone.0047532.s002.xls]

## Sheet: All clones
Name of clone	Same Site Clones	Replicon	Insertion Site	Tn Or.	Gene	Gene Or.	5'	3'	Insertion Ratio	Description	Common Name	Insertion Site Sequence	Plasmid Content		Comments
													Absent	Intermediate
T08TC701		Chrom	1277	Reverse	BB0002	Reverse	1796	768	0.503891	glycosyl hydrolase family 3 N domain protein		ATACCCAATC--TACGCAATTG		lp5
T07TC470		Chrom	12770	Reverse	BB0014	Forward	12746	14728	0.0126135	primosomal protein N	priA	TCATTCAACT--TATTACTATG	Complete
T08TC309		Chrom	12776	Forward	BB0014	Forward	12746	14728	0.0151362	primosomal protein N	priA	AACTTATTAC--TATGAAATAG	lp5
T08TC351		Chrom	12789	Reverse	BB0014	Forward	12746	14728	0.0221998	primosomal protein N	priA	GAAATAGCAA--TAAATATTCC	lp21,lp5
T04TC135		Chrom	13668	Reverse	BB0014	Forward	12746	14728	0.465691	primosomal protein N	priA	AATAACCAAA--TAAAAAAAAT	Complete
T05TC356	same site T05TC356, T08TC311	Chrom	13772	Reverse	BB0014	Forward	12746	14728	0.518163	primosomal protein N	priA	AGAACTATTA--TACAGTATAC	cp9	lp5
T08TC311	same site T05TC356, T08TC311	Chrom	13772	Forward	BB0014	Forward	12746	14728	0.517659	primosomal protein N	priA	AGAACTATTA--TACAGTATAC	lp38,cp9,lp5
T04TC038		Chrom	13945	Reverse	BB0014	Forward	12746	14728	0.605449	primosomal protein N	priA	GCCACTATTG--TAGTTATAAA	lp5
T09TC184		Chrom	14012	Reverse	BB0014	Forward	12746	14728	0.639253	primosomal protein N	priA	ATACAAAACT--TATGGAATTC	lp5
T07TC063	T07TC063, T07TC076	Chrom	14605	Forward	BB0014	Forward	12746	14728	0.937941	primosomal protein N	priA	ACAGATACAA--TATAATATAC	lp5
T07TC076	see T07TC063	Chrom	14605	Forward	BB0014	Forward	12746	14728	0.937941	primosomal protein N	priA	ACAGATACAA--TATAATATAC	cp9,lp5
T08TC589		Chrom	15803	Forward	IR BB0016-BB0017	0	15723	15844	0.661157	Intergenic Region		AGAATTCAAG--TAAATTACTA		cp9,lp5
T10TC412		Chrom	15906	Reverse	BB0017	Forward	15845	16804	0.0646507	conserved hypothetical integral membrane protein		CTATTATTAC--TAATACTAAT		lp5
T05TC255		Chrom	15912	Forward	BB0017	Forward	15845	16804	0.0698644	conserved hypothetical integral membrane protein		TTACTAATAC--TAATAAAAAA	Complete
T10TC496	same site T10TC496, T11TC133	Chrom	15931	Forward	BB0017	Forward	15845	16804	0.0896767	conserved hypothetical integral membrane protein		AATTAAAGAC--TATAACTAAA	lp5
T11TC133	see T10TC496	Chrom	15931	Reverse	BB0017	Forward	15845	16804	0.0907195	conserved hypothetical integral membrane protein		AATTAAAGAC--TATAACTAAA	Complete
T08TC605		Chrom	15975	Forward	BB0017	Forward	15845	16804	0.135558	conserved hypothetical integral membrane protein		ACAATACAAA--TAACTTTAGG	lp5
T08TC643		Chrom	16083	Reverse	BB0017	Forward	15845	16804	0.249218	conserved hypothetical integral membrane protein		CATTACCTAT--TAAGCTTCAA	lp5
T08TC542		Chrom	16116	Forward	BB0017	Forward	15845	16804	0.282586	conserved hypothetical integral membrane protein		ATATTTGCAT--TAAACATACC	Complete
T04TC336		Chrom	16165	Forward	BB0017	Forward	15845	16804	0.333681	conserved hypothetical integral membrane protein		ACCTAACATT--TATAATTCAA	lp28-1
T09TC452		Chrom	16196	Forward	BB0017	Forward	15845	16804	0.366006	conserved hypothetical integral membrane protein		AATGGGATTA--TATTCTATTA		lp5
T05TC494		Chrom	16239	Forward	BB0017	Forward	15845	16804	0.410845	conserved hypothetical integral membrane protein		CAAAATAAAA--TACATCTTAA	cp9,lp5
T06TC174		Chrom	16246	Reverse	BB0017	Forward	15845	16804	0.419187	conserved hypothetical integral membrane protein		AAATACATCT--TAATGATATG	lp5
T09TC420		Chrom	16263	Forward	BB0017	Forward	15845	16804	0.435871	conserved hypothetical integral membrane protein		ATGATGCTTG--TATCAATACT	lp28-1
T04TC019		Chrom	16269	Forward	BB0017	Forward	15845	16804	0.442127	conserved hypothetical integral membrane protein		CTTGTATCAA--TACTAGCTGG	lp28-2,lp5
T11TC206		Chrom	16351	Reverse	BB0017	Forward	15845	16804	0.528676	conserved hypothetical integral membrane protein		ATATAATTGC--TATGATCATT		lp28-1,lp5
T09TC408		Chrom	16360	Reverse	BB0017	Forward	15845	16804	0.53806	conserved hypothetical integral membrane protein		CTATGATCAT--TAAAGAAAAA	Complete
T08TC026	T08TC026, T08TC160, T08TC178	Chrom	16470	Reverse	BB0017	Forward	15845	16804	0.652763	conserved hypothetical integral membrane protein		TATACACTAA--TAGCATCATT	Complete
T08TC160	see T08TC026	Chrom	16470	Reverse	BB0017	Forward	15845	16804	0.652763	conserved hypothetical integral membrane protein		TATACACTAA--TAGCATCATT	Complete
T08TC178	see T08TC026	Chrom	16470	Reverse	BB0017	Forward	15845	16804	0.652763	conserved hypothetical integral membrane protein		TATACACTAA--TAGCATCATT	Complete
T05TC552		Chrom	16489	Reverse	BB0017	Forward	15845	16804	0.672576	conserved hypothetical integral membrane protein		TTGTAACATC--TATCATGACA	lp5
T10TC461		Chrom	16536	Forward	BB0017	Forward	15845	16804	0.720542	conserved hypothetical integral membrane protein		CAAAAAGCAA--TATTAATCAT	lp5
T10TC526		Chrom	16571	Reverse	BB0017	Forward	15845	16804	0.758081	conserved hypothetical integral membrane protein		AGAAATTGCT--TATCTTCTTA	lp5
T10TC506		Chrom	16579	Forward	BB0017	Forward	15845	16804	0.765381	conserved hypothetical integral membrane protein		CTTATCTTCT--TACAAACAAG		lp5
T04TC072		Chrom	16611	Reverse	BB0017	Forward	15845	16804	0.799791	conserved hypothetical integral membrane protein		GCTACATTAA--TAGACGGAAA	Complete
T07TC148	T10TC418, T10TC468; same site T07TC148	Chrom	16653	Reverse	BB0017	Forward	15845	16804	0.843587	conserved hypothetical integral membrane protein		AAAACTATAG--TATTTATAGT	Complete
T10TC418	T10TC418, T10TC468; same site T07TC148	Chrom	16653	Forward	BB0017	Forward	15845	16804	0.842544	conserved hypothetical integral membrane protein		AAAACTATAG--TATTTATAGT	Complete
T10TC468	T10TC418, T10TC468; same site T07TC148	Chrom	16653	Forward	BB0017	Forward	15845	16804	0.842544	conserved hypothetical integral membrane protein		AAAACTATAG--TATTTATAGT	Complete
T06TC407		Chrom	16659	Forward	BB0017	Forward	15845	16804	0.848801	conserved hypothetical integral membrane protein		ATAGTATTTA--TAGTAGTTCC	Not done
T05TC306		Chrom	16662	Reverse	BB0017	Forward	15845	16804	0.852972	conserved hypothetical integral membrane protein		GTATTTATAG--TAGTTCCAAT	lp5
T11TC429		Chrom	16690	Reverse	BB0017	Forward	15845	16804	0.882169	conserved hypothetical integral membrane protein		TATCAAGAAT--TAAATATATA	lp28-1
T10TC511		Chrom	16696	Forward	BB0017	Forward	15845	16804	0.887383	conserved hypothetical integral membrane protein		GAATTAAATA--TATATCACAA	Complete
T09TC528		Chrom	16698	Reverse	BB0017	Forward	15845	16804	0.890511	conserved hypothetical integral membrane protein		ATTAAATATA--TATCACAAAA	lp5
T10TC156		Chrom	20054	Reverse	IR BB0020-BB0021	0	19980	20444	0.161638	Intergenic Region	0	CTAATATCTA--TATATTATTT	cp32-7
T05TC441		Chrom	20315	Reverse	IR BB0020-BB0021	0	19980	20444	0.724138	Intergenic Region	0	AAGATGACTC--TAAAGCCCTA	Complete
T08TC699		Chrom	20825	Forward	BB0021	Reverse	21092	20445	0.412674	S-adenosylmethionine: tRNA ribosyltransferase-isomerase	queA	GTGAATAAAT--TAGTGTCAAT	Complete
T10P01D01	T10P01D01, T10P01E01	Chrom	20884	Forward	BB0021	Reverse	21092	20445	0.321484	S-adenosylmethionine: tRNA ribosyltransferase-isomerase	queA	TGATTCTGCA--TATATTCTTG	lp5
T10P01E01	T10P01D01, T10P01E01	Chrom	20884	Forward	BB0021	Reverse	21092	20445	0.321484	S-adenosylmethionine: tRNA ribosyltransferase-isomerase	queA	TGATTCTGCA--TATATTCTTG	Not done
T05TC143		Chrom	20886	Forward	BB0021	Reverse	21092	20445	0.318393	S-adenosylmethionine: tRNA ribosyltransferase-isomerase	queA	ATTCTGCATA--TATTCTTGAT	Complete
T09TC421		Chrom	20931	Forward	BB0021	Reverse	21092	20445	0.248841	S-adenosylmethionine: tRNA ribosyltransferase-isomerase	queA	TATTACTATT--TATATATTTT		lp5
T07TC120		Chrom	21039	Forward	BB0021	Reverse	21092	20445	0.0819165	S-adenosylmethionine: tRNA ribosyltransferase-isomerase	queA	GATATTGCTC--TATTAAAGAA	lp17,lp28-2,lp5	cp32-8
T06TC101		Chrom	21112	Reverse	BB0022	Reverse	22101	21058	0.947267	Holliday junction DNA helicase, subunit B	ruvB	TCTCTAAGTT--TAAGTGAAGG	lp28-1,lp5
T10TC486		Chrom	21176	Forward	BB0022	Reverse	22101	21058	0.886865	Holliday junction DNA helicase, subunit B	ruvB	AAATCCTTTC--ATAATTAAAT	Complete		anomolous transposition event
T04TC355		Chrom	21234	Reverse	BB0022	Reverse	22101	21058	0.830297	Holliday junction DNA helicase, subunit B	ruvB	CCTACAGAAA--TAGCTAAAGT	lp21,lp38
T03TC047		Chrom	21517	Reverse	BB0022	Reverse	22101	21058	0.558965	Holliday junction DNA helicase, subunit B	ruvB	AATTTCTCTT--TATTATCTCA	Complete
T03TC051		Chrom	21916	Reverse	BB0022	Reverse	22101	21058	0.176414	Holliday junction DNA helicase, subunit B	ruvB	GTGGGCCACT--TAAAAACACA	Complete
T11TC161		Chrom	22002	Reverse	BB0022	Reverse	22101	21058	0.0939597	Holliday junction DNA helicase, subunit B	ruvB	ACCTGACCTT--TAAAATCTTC	lp28-1,cp32-4
T05TC008		Chrom	22026	Reverse	BB0022	Reverse	22101	21058	0.0709492	Holliday junction DNA helicase, subunit B	ruvB	ACTTTAGGCC--TAAGCTCATT	lp21,lp38
T11P01A01		Chrom	22339	Reverse	BB0023	Reverse	22146	22739	0.674536	Holliday junction DNA helicase, subunit A	ruvA	GCTCGCTAT--TAATCAAAAGC	Not done
T08TC025		Chrom	22843	Forward	BB0024	Forward	22819	23958	0.0210711	conserved hypothetical protein		TTTAAATAGC--TATTTTCAAT	cp9,lp5
T09TC386		Chrom	22857	Reverse	BB0024	Forward	22819	23958	0.0342406	conserved hypothetical protein		TTCAATTAAT--TACAACTATT	Complete
T11TC199		Chrom	23006	Forward	BB0024	Forward	22819	23958	0.164179	conserved hypothetical protein		GATGGAAATA--TATTCATAGG	Complete	lp28-1
T05TC359		Chrom	23097	Forward	BB0024	Forward	22819	23958	0.244074	conserved hypothetical protein		AACCTATTGG--TATTGATTAT	cp9,lp5
T07TC240		Chrom	23186	Reverse	BB0024	Forward	22819	23958	0.32309	conserved hypothetical protein		AATAAAAGCA--TAAAATCACA	Complete
T11TC103		Chrom	23701	Reverse	BB0024	Forward	22819	23958	0.775241	conserved hypothetical protein		TCCAAAAGAA--TACATAAATA	lp28-1	lp5
T05TC122		Chrom	23720	Reverse	BB0024	Forward	22819	23958	0.791923	conserved hypothetical protein		AAATTATTCA--TAGCAGAACA	lp38,cp9,lp21,lp5
T11TC022		Chrom	23932	Forward	BB0024	Forward	22819	23958	0.977173	conserved hypothetical protein		AAATAAAATA--TACAGAGTTT	lp5
T11TC001		Chrom	24097	Forward	BB0025	Reverse	24696	23965	0.819425	conserved hypothetical protein		TTTCAGGAAT--TAAAGCTATC	lp21,lp5
T08P01E01	T08P01E01, T08P01E07, T08P02B04, T08P02C03, T08P02D02	Chrom	24428	Reverse	BB0025	Reverse	24696	23965	0.365253	conserved hypothetical protein		ATAAGGAGCA--TAAGCCTCAT	Not done
T08P01E07	see T08P01E01	Chrom	24428	Reverse	BB0025	Reverse	24696	23965	0.365253	conserved hypothetical protein		ATAAGGAGCA--TAAGCCTCAT	Not done
T08P02B04	see T08P01E01	Chrom	24428	Reverse	BB0025	Reverse	24696	23965	0.365253	conserved hypothetical protein		ATAAGGAGCA--TAAGCCTCAT	Not done
T08P02C03	see T08P01E01	Chrom	24428	Reverse	BB0025	Reverse	24696	23965	0.365253	conserved hypothetical protein		ATAAGGAGCA--TAAGCCTCAT	Not done
T08P02D02	see T08P01E01	Chrom	24428	Reverse	BB0025	Reverse	24696	23965	0.365253	conserved hypothetical protein		ATAAGGAGCA--TAAGCCTCAT	Not done
T06P01D03	T06P01D03, T06P01F07, T06P01H03	Chrom	24437	Forward	BB0025	Reverse	24696	23965	0.354309	conserved hypothetical protein		ATAAGCCTCA--TAAGTTATTT	lp21
T06P01F07	see T06P01D03	Chrom	24437	Forward	BB0025	Reverse	24696	23965	0.645691	conserved hypothetical protein		ATAAGCCTCA--TAAGTTATTT	Not done
T06P01H03	see T06P01D03	Chrom	24437	Forward	BB0025	Reverse	24696	23965	0.354309	conserved hypothetical protein		ATAAGCCTCA--TAAGTTATTT	Not done
T07TC336		Chrom	40790	Reverse	BB0042	Reverse	41432	40761	0.955291	phosphate transport system regulatory protein	phoU	TCACCTATTC--TAATAAAATA	Complete
T05TC153		Chrom	41271	Reverse	BB0042	Reverse	41432	40761	0.23845	phosphate transport system regulatory protein	phoU	GATAATCATC--TATTATTTTT	Complete
T03TC264		Chrom	41526	Forward	BB0043	Reverse	42483	41443	0.920192	conserved hypothetical protein		ATAACCAATT--TATAGTAATG	cp9,lp5
T05TC079		Chrom	41594	Reverse	BB0043	Reverse	42483	41443	0.853846	conserved hypothetical protein		TCCCAACAAA--TAACTATATT		lp28-1
T07TC130		Chrom	41631	Reverse	BB0043	Reverse	42483	41443	0.818269	conserved hypothetical protein		TTAATATACT--TAGGAAAGTA	cp9,lp28-1,lp5
T10TC024		Chrom	41799	Reverse	BB0043	Reverse	42483	41443	0.656731	conserved hypothetical protein		ATAGCAAGCC--TAATTAGATC	cp9	lp5
T05TC370		Chrom	41912	Forward	BB0043	Reverse	42483	41443	0.549038	conserved hypothetical protein		CAATAAAATA--TATTTATCGT	cp9,lp21	lp5
T09TC275		Chrom	42145	Reverse	BB0043	Reverse	42483	41443	0.324038	conserved hypothetical protein		TCAAGATAAT--TATTTTATTA	cp9,lp28-1,lp5
T07TC119		Chrom	42153	Forward	BB0043	Reverse	42483	41443	0.317308	conserved hypothetical protein		ATTATTTTAT--TAAATTCACT	cp9,lp5
T04TC318		Chrom	42352	Forward	BB0043	Reverse	42483	41443	0.125962	conserved hypothetical protein		AATTGGTATT--TACACTAATA	Complete
T09P01A04	same site T09P01A04, T11TC348	Chrom	42360	Forward	BB0043	Reverse	42483	41443	0.118269	conserved hypothetical protein		TTTACACTAA--TATCTACCTC	Not done
T11TC348	same site T09P01A04, T11TC348	Chrom	42360	Forward	BB0043	Reverse	42483	41443	0.118269	conserved hypothetical protein		TTTACACTAA--TATCTACCTC	Not done
T03TC105		Chrom	42409	Forward	BB0043	Reverse	42483	41443	0.0711538	conserved hypothetical protein		CGTCTTGACT--TATAAAAGCT	Complete
T09TC254		Chrom	42994	Forward	BB0045	Reverse	45366	42907	0.96462	P115 protein		CATTATGGGT--TATTACTAAG	Not done
T07TC397		Chrom	43212	Forward	BB0045	Reverse	45366	42907	0.875966	P115 protein		AAATTTATTC--TAATCTCAAC	lp38
T06TC309		Chrom	44182	Forward	BB0045	Reverse	45366	42907	0.481497	P115 protein		TAAGAGAGTC--TAATATATGC	lp5
T04TC257	same site: T05TC115, T04TC257, T05TC616	Chrom	44939	Forward	BB0045	Reverse	45366	42907	0.173648	P115 protein		TATAAACATA--TAAGGCGATT	lp5
T05TC115	same site: T05TC115, T04TC257, T05TC616	Chrom	44939	Reverse	BB0045	Reverse	45366	42907	0.173241	P115 protein		TATAAACATA--TAAGGCGATT	cp9,lp5
T05TC616	same site: T05TC115, T04TC257, T05TC616	Chrom	44939	Reverse	BB0045	Reverse	45366	42907	0.173241	P115 protein		TATAAACATA--TAAGGCGATT	lp5
T07TC420		Chrom	45036	Forward	BB0045	Reverse	45366	42907	0.134201	P115 protein		GAACCATCCT--TATAAAGACG	Complete
T09TC343		Chrom	45174	Forward	BB0045	Reverse	45366	42907	0.0780805	P115 protein		AAATCAGAAA--TATCTTCAAC		lp5
T06TC431		Chrom	45430	Reverse	IR BB0045-BB0046	0	45367	45445	0.820513	Intergenic Region	0	AAAAATATTT--TAAAAAAAGG	Not done
T11P01F06		Chrom	45535	Forward	BB0046	Forward	45446	45991	0.163303	ribonuclease HII	rnhB	AGCCCAGCTT--TATAAAAGAA	lp5
T10TC020		Chrom	45588	Forward	BB0046	Forward	45446	45991	0.26055	ribonuclease HII	rnhB	AGAGAGTACC--TATCCTCATT	cp32-6,lp5
T09TC010		Chrom	45614	Reverse	BB0046	Forward	45446	45991	0.310092	ribonuclease HII	rnhB	TGAAAACTCA--TATTATGCAT		lp5
T08P02E02		Chrom	45640	Forward	BB0046	Forward	45446	45991	0.355963	ribonuclease HII	rnhB	AAATTTCAAA--TATAACAATA	cp9,lp5
T08P01A04		Chrom	45642	Forward	BB0046	Forward	45446	45991	0.359633	ribonuclease HII	rnhB	TTTCAAATA--TAACAATAGAA	cp9,lp5		Poor quality sequence
T09TC189		Chrom	45735	Forward	BB0046	Forward	45446	45991	0.530275	ribonuclease HII	rnhB	TTAGTACTTG--TAGATGGCAA	lp5
T07TC411		Chrom	45841	Reverse	BB0046	Forward	45446	45991	0.726606	ribonuclease HII	rnhB	TTGCTAAAGT--TAAAAGAGAC	lp5
T08TC527		Chrom	47135	Reverse	IR BB0049-BB0050	0	47041	47166	0.76	Intergenic Region	0	AATTTTATAA--TAGTAAATCA	lp5
T08TC467	T08TC467, T08TC576	Chrom	47138	Forward	IR BB0049-BB0050	0	47041	47166	0.776	Intergenic Region	0	TTTATAATAG--TAAATCAAAT	lp5
T08TC576	T08TC467, T08TC576	Chrom	47138	Forward	IR BB0049-BB0050	0	47041	47166	0.776	Intergenic Region	0	TTTATAATAG--TAAATCAAAT	lp5
T07TC280		Chrom	47202	Forward	BB0050	Forward	47167	47841	0.0519288	putative transporter		GCGTGCTATT--TACCACTTAT	cp9
T05TC281		Chrom	47285	Reverse	BB0050	Forward	47167	47841	0.176558	putative transporter		GCAATTATTA--TAGCAAACAT	cp32-6
T09TC314	T09TC314, T09TC442	Chrom	47349	Reverse	BB0050	Forward	47167	47841	0.271513	putative transporter		TGGGCAACAT--TATTTATACA	cp32-6,cp9
T09TC442	T09TC314, T09TC442	Chrom	47349	Reverse	BB0050	Forward	47167	47841	0.271513	putative transporter		TGGGCAACAT--TATTTATACA	lp28-1
T03TC089		Chrom	47365	Forward	BB0050	Forward	47167	47841	0.293769	putative transporter		TACATCATCA--TACATTGCAA	lp5
T05TC501	same site T05TC501, T07TC180	Chrom	47576	Forward	BB0050	Forward	47167	47841	0.606825	putative transporter		GTTGCATACC--TAATATCCCA	lp5	cp9
T07TC180	same site T05TC501, T07TC180	Chrom	47576	Forward	BB0050	Forward	47167	47841	0.606825	putative transporter		GTTGCATACC--TAATATCCCA	cp9,lp5
T08TC353		Chrom	47603	Forward	BB0050	Forward	47167	47841	0.646884	putative transporter		GATGTTTATC--TATATCAGCT	lp5
T10TC420		Chrom	47666	Forward	BB0050	Forward	47167	47841	0.740356	putative transporter		GGATCAACAT--TAATAAGTGG	lp5
T05TC506		Chrom	47891	Reverse	IR BB0050-BB0051	0	47842	47904	0.806452	Intergenic Region	0	ATCAATCTGC--TACAATTAAA	lp28-1
T10P02G05	T10P02G05, T10P02H06	Chrom	47951	Forward	BB0051	Forward	47905	48606	0.0656205	conserved hypothetical integral membrane protein		GGAATGTTTC--TATTTATATA	Complete
T10P02H06	see T10P02G05	Chrom	47951	Forward	BB0051	Forward	47905	48606	0.0656205	conserved hypothetical integral membrane protein		GGAATGTTTC--TATTTATATA	Complete
T04TC183		Chrom	47955	Forward	BB0051	Forward	47905	48606	0.0713267	conserved hypothetical integral membrane protein		TGTTTCTATT--TATATATACA	lp5
T05TC109	same site T05TC109, T08TC617	Chrom	47957	Reverse	BB0051	Forward	47905	48606	0.0756063	conserved hypothetical integral membrane protein		TTTCTATTTA--TATATACAGC	lp5
T08TC617	same site T05TC109, T08TC617	Chrom	47957	Forward	BB0051	Forward	47905	48606	0.0741797	conserved hypothetical integral membrane protein		TTTCTATTTA--TATATACAGC	lp5	lp28-1
T05TC141	same site T05TC141, T11TC488	Chrom	48045	Forward	BB0051	Forward	47905	48606	0.199715	conserved hypothetical integral membrane protein		TGTCAAACAT--TATAATATTA	lp28-1,lp5
T11TC488	same site T05TC141, T11TC488	Chrom	48045	Reverse	BB0051	Forward	47905	48606	0.201141	conserved hypothetical integral membrane protein		TGTCAAACAT--TATAATATTA	Not done
T04TC361		Chrom	48047	Forward	BB0051	Forward	47905	48606	0.202568	conserved hypothetical integral membrane protein		TCAAACATTA--TAATATTAAG	cp32-4,lp5
T06TC378		Chrom	48107	Reverse	BB0051	Forward	47905	48606	0.289586	conserved hypothetical integral membrane protein		ATTACCTTTT--TATCAGCAGC	Not done
T11TC459		Chrom	48197	Forward	BB0051	Forward	47905	48606	0.416548	conserved hypothetical integral membrane protein		TTGCTAAACA--TAACTTTTAC	Not done
T10TC447		Chrom	48210	Reverse	BB0051	Forward	47905	48606	0.436519	conserved hypothetical integral membrane protein		CTTTTACAAT--TATGCTTTAT	Complete
T08TC584		Chrom	48217	Reverse	BB0051	Forward	47905	48606	0.446505	conserved hypothetical integral membrane protein		AATTATGCTT--TATTTTACGA	Complete
T10TC451	T10TC451, T10TC458	Chrom	48230	Reverse	BB0051	Forward	47905	48606	0.46505	conserved hypothetical integral membrane protein		TTTACGATAC--TATTCAATCA	Complete
T10TC458	T10TC451, T10TC458	Chrom	48230	Reverse	BB0051	Forward	47905	48606	0.46505	conserved hypothetical integral membrane protein		TTTACGATAC--TATTCAATCA	Complete
T10P01D10		Chrom	48243	Forward	BB0051	Forward	47905	48606	0.482168	conserved hypothetical integral membrane protein		TCAATCATAA--TAAATTAGAC	Not done
T10TC441		Chrom	48248	Forward	BB0051	Forward	47905	48606	0.489301	conserved hypothetical integral membrane protein		CATAATAAAT--TAGACACCGC	lp5
T08P01B01		Chrom	48282	Forward	BB0051	Forward	47905	48606	0.537803	conserved hypothetical integral membrane protein		AAATACTGTT--TAATAACTCT	Not done
T08TC334		Chrom	48345	Reverse	BB0051	Forward	47905	48606	0.629101	conserved hypothetical integral membrane protein		TATCCCAATA--TACAAACATC	lp5
T08TC038		Chrom	48356	Reverse	BB0051	Forward	47905	48606	0.644793	conserved hypothetical integral membrane protein		ACAAACATCT--TACTATATAA	cp9,lp21,lp5
T08TC126		Chrom	48367	Forward	BB0051	Forward	47905	48606	0.659058	conserved hypothetical integral membrane protein		ACTATATAAT--TATTTAAAGC	Complete
T02P01A01	T02P01A01, T02P01A06	Chrom	48458	Forward	BB0051	Forward	47905	48606	0.788873	conserved hypothetical integral membrane protein		TTCAATCTAG--TATTTAACTA	cp9
T02P01A06	T02P01A01, T02P01A06	Chrom	48458	Forward	BB0051	Forward	47905	48606	0.788873	conserved hypothetical integral membrane protein		TTCAATCTAG--TATTTAACTA	cp9,lp28-1
T06P01A08	T06P01A08, T06P01E07, T06P01E08	Chrom	48473	Reverse	BB0051	Forward	47905	48606	0.811698	conserved hypothetical integral membrane protein		ATAAATACAA--TACTTAAATT	Not done
T06P01E07	see T06P01A06	Chrom	48473	Reverse	BB0051	Forward	47905	48606	0.811698	conserved hypothetical integral membrane protein		ATAAATACAA--TACTTAAATT	Not done
T06P01E08	see T06P01A06	Chrom	48473	Reverse	BB0051	Forward	47905	48606	0.810271	conserved hypothetical integral membrane protein		ATAAATACAA--TACTTAAATT	Not done
T10P01A02	T10P01A02, T10P01E05, T10P01E08, T10P01H11, T10P02F06	Chrom	48477	Forward	BB0051	Forward	47905	48606	0.815977	conserved hypothetical integral membrane protein		ATACAATACT--TAAATTCTAC	Complete
T10P01E05	see T10P01A02	Chrom	48477	Forward	BB0051	Forward	47905	48606	0.815977	conserved hypothetical integral membrane protein		ATACAATACT--TAAATTCTAC	Not done
T10P01E08	see T10P01A02	Chrom	48477	Forward	BB0051	Forward	47905	48606	0.815977	conserved hypothetical integral membrane protein		ATACAATACT--TAAATTCTAC	Not done
T10P01H11	see T10P01A02	Chrom	48477	Forward	BB0051	Forward	47905	48606	0.815977	conserved hypothetical integral membrane protein		ATACAATACT--TAAATTCTAC	Not done
T10P02F06	see T10P01A02	Chrom	48477	Forward	BB0051	Forward	47905	48606	0.815977	conserved hypothetical integral membrane protein		ATACAATACT--TAAATTCTAC	Not done
T05TC607	same site: T05TC607, T08TC450	Chrom	48542	Forward	BB0051	Forward	47905	48606	0.908702	conserved hypothetical integral membrane protein		ACATTAATAA--TAATTGCAAT	Complete
T08TC450	same site: T05TC607, T08TC450	Chrom	48542	Reverse	BB0051	Forward	47905	48606	0.910128	conserved hypothetical integral membrane protein		ACATTAATAA--TAATTGCAAT	cp9,lp28-1
T05TC062		Chrom	49715	Forward	BB0053	Forward	49341	50012	0.557377	uracil DNA glycosylase	ung	TTCTAATAAA--TACAATTTTA	cp9,lp5
T10P01D12		Chrom	49829	Reverse	BB0053	Forward	49341	50012	0.728763	uracil DNA glycosylase	ung	ACATTGTGTT--TATGCTTTGG	cp32-6
T05TC262		Chrom	65792	Reverse	BB0071	Forward	65768	67240	0.0169837	membrane protein, putative		AGGTTTTTTA--TATTTAATTA	cp9,lp5
T04TC428		Chrom	65900	Forward	BB0071	Forward	65768	67240	0.0896739	membrane protein, putative		TGCCAATGAA--TATATAAATT	lp5
T07TC016		Chrom	66300	Reverse	BB0071	Forward	65768	67240	0.362092	membrane protein, putative		GCTTTTATGA--TAAGCAAAGA	cp9
T08TC176		Chrom	66331	Reverse	BB0071	Forward	65768	67240	0.383152	membrane protein, putative		TTTATCCATT--TACAGTTCTC	Complete
T08TC148		Chrom	66508	Reverse	BB0071	Forward	65768	67240	0.503397	membrane protein, putative		TTACTACAAA--TATTGATCCC	Complete
T03TC304		Chrom	66779	Forward	BB0071	Forward	65768	67240	0.686821	membrane protein, putative		AAAATTAAAT--TACTTTGATT	Complete
T04TC351		Chrom	66813	Forward	BB0071	Forward	65768	67240	0.709918	membrane protein, putative		AACATTTATA--TAATGCTGGG	lp28-1,cp32-4,lp5
T05TC148		Chrom	69945	Forward	BB0073	Forward	69566	70126	0.676786	conserved hypothetical protein		TTTGAAGGAT--TAGAAATACT	cp32-6,cp9
T11TC113		Chrom	77893	Forward	BB0082	Reverse	79009	77711	0.859784	conserved hypothetical protein		TCCTTATCAA--TATAACCAAT	cp32-6	lp5
T09TC374		Chrom	79457	Forward	IR BB0083-BB0084	0	79377	79504	0.629921	Intergenic Region	0	AAAATAATGA--TATAATAATT	Complete
T05TC426		Chrom	80845	Reverse	IR BB0084-BB0085	0	80774	80982	0.346154	Intergenic Region	0	ATTTCAGGAT--TAATAAGAAT		lp28-1
T11P01A10		Chrom	80893	Forward	IR BB0084-BB0085	0	80774	80982	0.572115	Intergenic Region	0	ATTTCAACTG--TAATACTATA	Not done
T11TC194		Chrom	81399	Reverse	BB0085	Forward	80983	81408	0.981176	conserved hypothetical protein		TAAGGAGAAC--TATCAGATGA	Complete
T05TC072		Chrom	81971	Forward	BB0086	Forward	81405	82940	0.36873	putative Mg chelatase homolog		AAGATTATAT--TATAGATTAT	lp28-2,lp5
T07TC424		Chrom	82925	Reverse	BB0086	Forward	81405	82940	0.990879	putative Mg chelatase homolog		ACGGAGAAAA--TATGCTTGAA	lp5
T04TC332		Chrom	85045	Reverse	BB0088	Reverse	85720	84041	0.401429	GTP-binding membrane protein	lepA	ACATCTGATA--TATTTTTTAT	Complete
T07TC038		Chrom	85276	Forward	BB0088	Reverse	85720	84041	0.264443	GTP-binding membrane protein	lepA	AATGGATCCT--TAATACTTCC	Complete
T09P01B04	T9P01B04, T9P01C01	Chrom	85789	Forward	IR BB0088-BB0089	0	85721	85879	0.43038	Intergenic Region	0	AATGTAGATT--TACCATGATC	Complete
T09P01C01	T9P01B04, T9P01C01	Chrom	85789	Forward	IR BB0088-BB0089	0	85721	85879	0.43038	Intergenic Region	0	AATGTAGATT--TACCATGATC	Not done
T09TC444		Chrom	85935	Reverse	BB0089	Reverse	86854	85880	0.942505	hypothetical protein		TTTAGCAATA--TAAGGAGAAA		lp5
T08TC330		Chrom	94829	Reverse	BB0098	Reverse	96953	94611	0.90649	homologous recombination suppressor protein MutS2	mutS2	CTCATACCCC--TAATATCAAT	Complete
T10TC244		Chrom	95445	Reverse	BB0098	Reverse	96953	94611	0.643467	homologous recombination suppressor protein MutS2	mutS2	CACGAATTAC--TATGCTCCTG	lp5
T10TC437		Chrom	95957	Forward	BB0098	Reverse	96953	94611	0.425278	homologous recombination suppressor protein MutS2	mutS2	TTAGGACCAG--TAATAATTAC	Complete
T08TC462		Chrom	95960	Forward	BB0098	Reverse	96953	94611	0.423997	homologous recombination suppressor protein MutS2	mutS2	GGACCAGTAA--TAATTACAAC	cp9
T05TC598		Chrom	96795	Reverse	BB0098	Reverse	96953	94611	0.0670367	homologous recombination suppressor protein MutS2	mutS2	TAATCAGACT--TACAAAGGAG	Complete
T06TC494		Chrom	97224	Forward	BB0099	Reverse	97866	96943	0.695558	ribosome small subunit-dependent GTPase A	rsgA	GAATAAACGG--TAGTATGTTT	Not done
T06TC126	same site: T06TC126, T10TC123	Chrom	97248	Forward	BB0099	Reverse	97866	96943	0.669556	ribosome small subunit-dependent GTPase A	rsgA	CTAGAATACT--TATGTGAAAT	lp5
T10TC123	same site: T06TC126, T10TC123	Chrom	97248	Forward	BB0099	Reverse	97866	96943	0.669556	ribosome small subunit-dependent GTPase A	rsgA	CTAGAATACT--TATGTGAAAT	Complete
T08TC466		Chrom	97697	Forward	BB0099	Reverse	97866	96943	0.183099	ribosome small subunit-dependent GTPase A	rsgA	GCGAGAACTA--TAAATATATC	lp21
T04TC153		Chrom	97762	Forward	BB0099	Reverse	97866	96943	0.112676	ribosome small subunit-dependent GTPase A	rsgA	CTGTTTCTAA--TACCTTACCC	cp9,lp28-2,lp5
T06TC440	same site: T06TC440, T08TC104	Chrom	97822	Reverse	BB0099	Reverse	97866	96943	0.0465872	ribosome small subunit-dependent GTPase A	rsgA	AAATAGAATA--TATATTATTA	Not done
T08TC104	same site: T06TC440, T08TC104	Chrom	97822	Reverse	BB0099	Reverse	97866	96943	0.0465872	ribosome small subunit-dependent GTPase A	rsgA	AAATAGAATA--TATATTATTA	Complete
T08P01D08		Chrom	100457	Reverse	BB0102	Forward	100228	100749	0.441459	conserved hypothetical protein		AATTCCAATA--TATACATACA	Not done
T03TC127		Chrom	100509	Reverse	BB0102	Forward	100228	100749	0.541267	conserved hypothetical protein		ATTTAGGCAA--TAATATCAAT	Complete
T07TC367		Chrom	100652	Reverse	BB0102	Forward	100228	100749	0.815739	conserved hypothetical protein		ACTCACATGC--TAATCGGCCC	lp5
T04TC417	same site: T04TC417, T05TC013	Chrom	100724	Reverse	BB0102	Forward	100228	100749	0.953935	conserved hypothetical protein		TACACTTTAA--TAGAATACAT	lp28-1
T05TC013	same site: T04TC417, T05TC013	Chrom	100724	Reverse	BB0102	Forward	100228	100749	0.953935	conserved hypothetical protein		TACACTTTAA--TAGAATACAT	lp5
T11TC144		Chrom	108496	Forward	BB0110	Forward	108307	109671	0.138563	conserved hypothetical protein		TATTTTTACC--TATGTTTCAA	lp5
T03TC328		Chrom	108731	Reverse	BB0110	Forward	108307	109671	0.311584	conserved hypothetical protein		ATGCAAAGCA--TAATTCACCT	cp9
T04TC326		Chrom	108859	Reverse	BB0110	Forward	108307	109671	0.405425	conserved hypothetical protein		TTTAGAAAAT--TATATGGACT	lp5
T06TC500		Chrom	109564	Forward	BB0110	Forward	108307	109671	0.921554	conserved hypothetical protein		TTTCAAAATA--TATTCAAAAG	Not done
T03TC342		Chrom	109589	Forward	BB0110	Forward	108307	109671	0.939883	conserved hypothetical protein		TATATTCCTA--TAGCTTATAA	lp5
T06TC366		Chrom	109676	Reverse	BB0111	Reverse	111042	109675	0.998537	replicative DNA helicase	dnaB	AAATAACAAC--TAATACTGGT	lp5
T08P01C05	T08P01C05, T08P02E04	Chrom	113341	Forward	BB0116	Reverse	114633	112909	0.74942	PTS system, maltose and glucose-specific IIABC component	malX-1	CTGTAACAAA--TATCTGAAAA	Not done
T08P02E04	T08P01C05, T08P02E04	Chrom	113341	Forward	BB0116	Reverse	114633	112909	0.74942	PTS system, maltose and glucose-specific IIABC component	malX-1	CTGTAACAAA--TATCTGAAAA	lp28-2,lp5
T06TC105		Chrom	113730	Reverse	BB0116	Reverse	114633	112909	0.523202	PTS system, maltose and glucose-specific IIABC component	malX-1	AGTCCAAACA--TAATAGATAG	lp5
T08TC001		Chrom	114115	Reverse	BB0116	Reverse	114633	112909	0.299884	PTS system, maltose and glucose-specific IIABC component	malX-1	AAGGTTTGGG--TAGCTTCATA	cp9,lp5
T09TC132		Chrom	114471	Reverse	BB0116	Reverse	114633	112909	0.0933875	PTS system, maltose and glucose-specific IIABC component	malX-1	TAAACAATAC--TAGAAGAATT	lp28-1
T06TC049		Chrom	114544	Reverse	BB0116	Reverse	114633	112909	0.0510441	PTS system, maltose and glucose-specific IIABC component	malX-1	TAGGCACTCG--TAGTGCTTTA	Complete
T05TC381		Chrom	114679	Reverse	IR BB0116-BB0117	0	114634	114806	0.267442	Intergenic Region	0	AAACTTTACT--TACTACACAA	cp9	lp5
T04TC365		Chrom	114973	Reverse	BB0117	Forward	114807	115508	0.238231	membrane protein	yplQ	AAAAAAGATT--TACATGTAGT	Complete
T07TC284		Chrom	115015	Reverse	BB0117	Forward	114807	115508	0.298146	membrane protein	yplQ	TCAATGACCC--TATTATATGT	cp9,lp5	lp17
T04TC181	same site: T06P01C08 and siblings	Chrom	115018	Reverse	BB0117	Forward	114807	115508	0.302425	membrane protein	yplQ	ATGACCCTAT--TATATGTAAT	lp5	lp28-3,lp38
T06P01C08	T06P01C08, T06P01D06, T06P01E04, T06P01E05, T06P01E06, T06P01F04, T06P01G04; same site: T04TC181	Chrom	115018	Reverse	BB0117	Forward	114807	115508	0.302425	membrane protein	yplQ	ATGACCCTAT--TATATGTAAT	Not done
T06P01D06	see T06P01C08	Chrom	115018	Reverse	BB0117	Forward	114807	115508	0.302425	membrane protein	yplQ	ATGACCCTAT--TATATGTAAT	Not done
T06P01E04	see T06P01C08	Chrom	115018	Reverse	BB0117	Forward	114807	115508	0.302425	membrane protein	yplQ	ATGACCCTAT--TATATGTAAT	Not done
T06P01E05	see T06P01C08	Chrom	115018	Reverse	BB0117	Forward	114807	115508	0.302425	membrane protein	yplQ	ATGACCCTAT--TATATGTAAT	Not done
T06P01E06	see T06P01C08	Chrom	115018	Reverse	BB0117	Forward	114807	115508	0.302425	membrane protein	yplQ	ATGACCCTAT--TATATGTAAT	Not done
T06P01F04	see T06P01C08	Chrom	115018	Reverse	BB0117	Forward	114807	115508	0.302425	membrane protein	yplQ	ATGACCCTAT--TATATGTAAT	Not done
T06P01G04	see T06P01C08	Chrom	115018	Reverse	BB0117	Forward	114807	115508	0.302425	membrane protein	yplQ	ATGACCCTAT--TATATGTAAT	Complete
T08TC080		Chrom	116341	Reverse	BB0118	Reverse	116818	115505	0.362529	RIP metalloprotease	rseP	TTTTTATCAT--TAACCTTTAA	Complete
T10TC306		Chrom	116458	Reverse	BB0118	Reverse	116818	115505	0.27342	RIP metalloprotease	rseP	CTTATAAAAA--TAAAAACAAT	lp28-1
T11TC303		Chrom	132172	Reverse	BB0134	Forward	131277	132425	0.780488	tetratricopeptide repeat domain protein		GATCCATCAA--TATATTCAAA	Not done
T03TC163		Chrom	132235	Reverse	BB0134	Forward	131277	132425	0.835366	tetratricopeptide repeat domain protein		AAAGATAACA--TAATTCAATT	lp5
T07TC281		Chrom	132343	Reverse	BB0134	Forward	131277	132425	0.929443	tetratricopeptide repeat domain protein		AATGTTGAAA--TACTTGGACA	lp5
T05TC627		Chrom	137925	Reverse	BB0138	Reverse	138089	137880	0.779904	conserved hypothetical protein		AAAAATATTT--TAATAAAAAA	lp5
T06TC143		Chrom	139216	Reverse	BB0140	Reverse	141960	138850	0.881994	Borrelia efflux system protein B	BesB	CAAGAAAATG--TATAAGCACA	cp9
T05TC271		Chrom	139329	Reverse	BB0140	Reverse	141960	138850	0.845659	Borrelia efflux system protein B	BesB	ATAGCCATCA--TAATGATTAT	cp9
T06TC563		Chrom	139336	Reverse	BB0140	Reverse	141960	138850	0.843408	Borrelia efflux system protein B	BesB	TCATAATGAT--TATTTTAAAC	Complete
T04TC254		Chrom	139419	Forward	BB0140	Reverse	141960	138850	0.817042	Borrelia efflux system protein B	BesB	TGGGGCACCT--TATTATTAAT	Complete
T07TC392		Chrom	139659	Forward	BB0140	Reverse	141960	138850	0.739871	Borrelia efflux system protein B	BesB	TTAAGAACAA--TATCATAATT	lp5
T04TC346		Chrom	140092	Forward	BB0140	Reverse	141960	138850	0.600643	Borrelia efflux system protein B	BesB	CGTTGAAAGT--TATTCTATCA	cp9,lp5
T05TC350		Chrom	140118	Forward	BB0140	Reverse	141960	138850	0.592283	Borrelia efflux system protein B	BesB	AAAGTAGCAA--TAATACTTTT	lp21
T06TC058		Chrom	140388	Reverse	BB0140	Reverse	141960	138850	0.505145	Borrelia efflux system protein B	BesB	AAATAATAAA--TACTAGCAAA	lp5
T04TC401		Chrom	140634	Reverse	BB0140	Reverse	141960	138850	0.426045	Borrelia efflux system protein B	BesB	GTTGAAGATG--TAATAGGCAA	Complete
T09TC050		Chrom	140710	Forward	BB0140	Reverse	141960	138850	0.401929	Borrelia efflux system protein B	BesB	TATATTTGTA--TATATTGTCT	lp5
T09TC036		Chrom	141312	Reverse	BB0140	Reverse	141960	138850	0.208039	Borrelia efflux system protein B	BesB	TTCTCCAATA--TATTGCCAGC	cp9,lp5
T11TC385		Chrom	141500	Forward	BB0140	Reverse	141960	138850	0.14791	Borrelia efflux system protein B	BesB	TTCATCGGCA--TATCTTTTAA	lp5
T07TC263		Chrom	141943	Reverse	BB0140	Reverse	141960	138850	0.00514469	Borrelia efflux system protein B	BesB	GTTTGCCAAC--TATTCTCTTT	cp9	lp28-3,lp17
T08TC099		Chrom	142557	Reverse	BB0141	Reverse	142935	141979	0.394351	Borrelia efflux system protein A	BesA	ATATTTAAAA--TATATCCTGA	cp9,lp5
T08TC113		Chrom	142800	Reverse	BB0141	Reverse	142935	141979	0.140167	Borrelia efflux system protein A	BesA	ACTGGGAATC--TATAGGAACT		lp5
T06TC059		Chrom	142879	Reverse	BB0141	Reverse	142935	141979	0.0575314	Borrelia efflux system protein A	BesA	AAACTAAGAA--TAAAACTAAA	lp5
T05TC307		Chrom	143084	Forward	BB0142	Reverse	144266	142944	0.8941	Borrelia efflux system protein C	BesC	ACCCCGGAAT--TAAAAGCATT	lp21,lp28-1,lp5
T11TC359		Chrom	143235	Reverse	BB0142	Reverse	144266	142944	0.779123	Borrelia efflux system protein C	BesC	CATTGTTTTG--TAGTATTTTT	Not done
T10TC092		Chrom	143304	Forward	BB0142	Reverse	144266	142944	0.727685	Borrelia efflux system protein C	BesC	ATATTTCAGT--TAAACCATAA	lp5
T05TC630		Chrom	143826	Forward	BB0142	Reverse	144266	142944	0.332829	Borrelia efflux system protein C	BesC	TAAGAACATT--TAGCTTGATA	lp28-1,lp5
T08TC002		Chrom	144289	Forward	IR BB0142-BB0143	0	144267	144306	0.564103	Intergenic Region	0	ATTATTATAA--TATAATACAA	cp9,lp28-1
T06TC417		Chrom	144595	Reverse	BB0144	Reverse	145458	144586	0.988532	glycine betaine, L-proline ABC transporter, periplasmic binding protein	proX	ATTAATCAAA--TAAGGTCTTA	cp9, lp5
T03TC228		Chrom	145716	Reverse	BB0145	Reverse	146370	145471	0.726363	glycine betaine, L-proline ABC transporter, permease protein	proW	ATCATAGATA--TAGCCATCAT	Complete
T07TC340		Chrom	150836	Forward	BB0150	Reverse	150897	150805	0.663043	hypothetical protein		AAACAAAATA--TAATGTATAA	lp5
T06TC359		Chrom	150940	Forward	IR BB0150-BB0151	0	150898	150973	0.56	Intergenic Region	0	TTAATGCTTA--TAGTAAAATA	Complete
T07TC102		Chrom	153145	Forward	BB0153	Reverse	153719	153075	0.891304	superoxide dismutase	sodA	TGCATCAACA--TATTCAATTC	cp9,lp5
T03TC039		Chrom	153217	Reverse	BB0153	Reverse	153719	153075	0.77795	superoxide dismutase	sodA	AATCGGCTTA--TAAGAATTCA	lp28-1,lp5
T04TC042		Chrom	153326	Forward	BB0153	Reverse	153719	153075	0.610248	superoxide dismutase	sodA	TTCATTGCAG--TATCTTTCAA	lp21,lp38
T08TC433		Chrom	157928	Reverse	BB0156	Forward	157627	158061	0.695853	conserved hypothetical protein		TTGCTTTATA--TAAGCAGCAA	cp32-6,lp5
T09TC514		Chrom	157951	Reverse	BB0156	Forward	157627	158061	0.748848	conserved hypothetical protein		CTTTACAACA--TATGCTAATA	lp5
T11TC240		Chrom	157961	Reverse	BB0156	Forward	157627	158061	0.771889	conserved hypothetical protein		TATGCTAATA--TAATCTATCA		lp5
T04TC231	same site: T04TC231, T09TC262	Chrom	157994	Reverse	BB0156	Forward	157627	158061	0.847926	conserved hypothetical protein		TTAAGTATAA--TATTAAAGAG	cp32-3,cp32-6,lp5
T09TC262	same site: T04TC231, T09TC262	Chrom	157994	Forward	BB0156	Forward	157627	158061	0.845622	conserved hypothetical protein		TTAAGTATAA--TATTAAAGAG	Complete
T05TC360		Chrom	158215	Reverse	BB0157	Forward	158058	158474	0.379808	conserved hypothetical protein		ATTTTTGGAT--TATTATTTTT		lp5
T04TC060		Chrom	158429	Forward	BB0157	Forward	158058	158474	0.891827	conserved hypothetical protein		TATCAATCAC--TATAGGAATA	lp28-2
T06TC352		Chrom	158549	Reverse	IR BB0157-BB0158	0	158475	158627	0.493421	Intergenic Region	0	ATTAGCATTC--TATATTATTA	cp9,lp5
T08TC271		Chrom	158732	Forward	BB0158	Forward	158628	159344	0.145251	S2 lipoprotein		AAGACAGCAA--TACTGGCAAA	lp5
T08TC089		Chrom	158834	Forward	BB0158	Forward	158628	159344	0.287709	S2 lipoprotein		TAACTTGGAT--AAAAACAAAG		lp5	anomolous transposition event
T08TC640		Chrom	158917	Forward	BB0158	Forward	158628	159344	0.403631	S2 lipoprotein		TCTTATATAA--TATCTCCTGT	lp5
T05TC050		Chrom	159199	Forward	BB0158	Forward	158628	159344	0.797486	S2 lipoprotein		CTTGCAGATT--TAACTGTCAA	cp9	lp5
T04TC111		Chrom	159611	Forward	BB0159	Forward	159368	160042	0.360534	conserved hypothetical protein		AGGGATTAGT--TATTCATTTA		cp9
T10TC480		Chrom	159717	Reverse	BB0159	Forward	159368	160042	0.519288	conserved hypothetical protein		TTAGAATTTT--TAAGTCCAGA	lp5
T11TC107		Chrom	159760	Forward	BB0159	Forward	159368	160042	0.581602	conserved hypothetical protein		TAAGCAGCCT--TACTAGTGGA	lp5
T10TC134		Chrom	159962	Forward	BB0159	Forward	159368	160042	0.881306	conserved hypothetical protein		CCCTAAAATA--TATAATGATT	cp32-7
T09TC216		Chrom	160087	Reverse	IR BB0159-BB0160	0	160043	160089	0.978261	Intergenic Region	0	CTAAGAGAGC--TAAATGTATA	lp5
T05TC388		Chrom	161369	Reverse	BB0161	Reverse	162864	161200	0.897837	conserved hypothetical protein		TTCATATTTA--TAAACACTAA	lp28-1	lp5
T08TC078		Chrom	161654	Forward	BB0161	Reverse	162864	161200	0.727163	conserved hypothetical protein		GTCGTAAGAG--TATCTATAAA	Complete
T07TC440		Chrom	161952	Forward	BB0161	Reverse	162864	161200	0.548077	conserved hypothetical protein		TTGTCGTAAT--TATATTCCTT	Complete
T04TC116		Chrom	162002	Reverse	BB0161	Reverse	162864	161200	0.517428	conserved hypothetical protein		TTCATAACGA--TAAATTGCTA	lp5
T06P01F02	T06P01F02, T06P01G01	Chrom	162106		BB0161	Forward	161200	162864	0.544471	conserved hypothetical protein		TTAGTAGC--TACAGAAAATG	Complete
T06P01G01	see T06P01F02	Chrom	162106	Forward	BB0161	Reverse	162864	161200	0.455529	conserved hypothetical protein		TTTTAGTAGC--TACAGAAAAT	Not done
T08TC073		Chrom	162296	Forward	BB0161	Reverse	162864	161200	0.341346	conserved hypothetical protein		CTTTGTAAAA--TACACATTAT	Complete
T04TC396		Chrom	162373	Forward	BB0161	Reverse	162864	161200	0.295072	conserved hypothetical protein		CATTGTCGTA--TAAAAAATGA	Complete
T10TC287		Chrom	162472	Reverse	BB0161	Reverse	162864	161200	0.234976	conserved hypothetical protein		TCATATACTC--TATATGTTCA	Complete
T11TC116		Chrom	163769	Reverse	BB0163	Reverse	164820	163072	0.600686	conserved hypothetical protein		AAAAGGCTTG--TACAAATAAA	Complete
T05TC093		Chrom	164874	Forward	IR BB0163-BB0164	0	164821	164900	0.670886	Intergenic Region	0	AAAAATATAT--TAACAAGTCA	Complete
T11P02D04		Chrom	164997	Reverse	BB0164	Reverse	165914	164901	0.904245	Na+/Ca+ exchange protein, putative		ATTTAACCAC--TAAAAATAAA	cp32-6, lp5
T10TC404		Chrom	166239	Reverse	BB0165	Reverse	167759	165915	0.823753	conserved hypothetical protein		ACATAGGAGA--TATGACGTCA	Complete
T05TC451		Chrom	166286	Forward	BB0165	Reverse	167759	165915	0.798807	conserved hypothetical protein		TGCCCAATAC--TATTAGTAGG	Complete
T05TC448		Chrom	167396	Forward	BB0165	Reverse	167759	165915	0.196855	conserved hypothetical protein		CTAGATGTAA--TATATGCACC	Complete
T07TC032		Chrom	167689	Reverse	BB0165	Reverse	167759	165915	0.0374187	conserved hypothetical protein		GGTTAATGAA--TATATACTAA	lp28-1
T05TC531		Chrom	167770	Forward	IR BB0165-BB0166	0	167760	167878	0.0847458	Intergenic Region	0	TAATACATGA--TACTTGCAAA	lp28-1,lp5
T10TC505		Chrom	168540	Reverse	BB0166	Reverse	169399	167879	0.564474	4-alpha-glucanotransferase	malQ	CCACCATTCA--TACTTAAATT		lp5
T06TC271		Chrom	168892	Forward	BB0166	Reverse	169399	167879	0.333553	4-alpha-glucanotransferase	malQ	AAAAGAACAT--TAAAAGCATT	lp5
T05TC131	same site: T05TC131, T06TC167	Chrom	169314	Reverse	BB0166	Reverse	169399	167879	0.0552632	4-alpha-glucanotransferase	malQ	TCCAATGCCA--TATTTAGATG	cp9	lp5
T06TC167	same site: T05TC131, T06TC167	Chrom	169314	Forward	BB0166	Reverse	169399	167879	0.0559211	4-alpha-glucanotransferase	malQ	TCCAATGCCA--TATTTAGATG	cp9,lp5
T05TC504		Chrom	169454	Forward	IR BB0166-BB0167	0	169400	169538	0.391304	Intergenic Region	0	TTATAAATTA--TAATAAATAT	Complete
T06TC121		Chrom	169479	Reverse	IR BB0166-BB0167	0	169400	169538	0.57971	Intergenic Region	0	CAGAACAACA--TATTAAATAG	Complete
T06TC217		Chrom	169819	Reverse	BB0167	Forward	169539	170708	0.240376	outer membrane protein	tpn50	TACCTATTAA--ATGAAGAGTT	Complete		anomolous transposition event
T03TC114		Chrom	170027	Forward	BB0167	Forward	169539	170708	0.417451	outer membrane protein	tpn50	AATTTAATGT--TAACTACGAA	lp5
T03TC090		Chrom	170180	Reverse	BB0167	Forward	169539	170708	0.549187	outer membrane protein	tpn50	GCAATACATA--TAAATACAGC	lp5
T04TC113		Chrom	170294	Reverse	BB0167	Forward	169539	170708	0.646707	outer membrane protein	tpn50	ATGATAATCT--TATTGAAACT	lp21
T04TC003		Chrom	170539	Reverse	BB0167	Forward	169539	170708	0.856287	outer membrane protein	tpn50	ATGCACGAGC--TATCTGAAAA	lp38,cp9,lp28-1
T08P01C11		Chrom	179411	Reverse	BB0177	Reverse	179543	178917	0.209265	glucose inhibited division protein B	gidB	AAATTGCTAT--TACTATTTGA	Complete
T03TC242		Chrom	186790	Reverse	BB0183	Forward	186554	186946	0.604592	flagellar assembly protein	fliW-1	ATGAAAAAGT--TATACTATGC	lp5
T08TC211		Chrom	186795	Forward	BB0183	Forward	186554	186946	0.614796	flagellar assembly protein	fliW-1	AAAGTTATAC--TATGCATAAT	cp9,lp5
T04TC034		Chrom	191508	Reverse	IR BB0193-BB0194	0	191460	191517	0.859649	Intergenic Region	0	TAAATAATTA--TAAATAAAAT	cp9,lp5
T11TC479		Chrom	191552	Reverse	BB0194	Reverse	192327	191518	0.956737	hydrolase, TatD family		AAAGCTATTA--TATACTGCAA	Not done
T08TC647		Chrom	191871	Reverse	BB0194	Reverse	192327	191518	0.562423	hydrolase, TatD family		CTTACAATAT--TATAGACATC	lp5
T07TC427		Chrom	191896	Reverse	BB0194	Reverse	192327	191518	0.53152	hydrolase, TatD family		AGGCATCTCT--TATATGCAAA	Complete
T09TC398		Chrom	192221	Reverse	BB0194	Reverse	192327	191518	0.12979	hydrolase, TatD family		ATTAATAATG--TAATTGACAT		lp5
T04TC062		Chrom	192247	Reverse	BB0194	Reverse	192327	191518	0.0976514	hydrolase, TatD family		ATCTTTTCTT--TAATTCATAA	Complete
T09TC294		Chrom	192270	Reverse	BB0194	Reverse	192327	191518	0.0692213	hydrolase, TatD family		TGAACATGAG--TATCTATTAA	lp5
T07TC352		Chrom	194895	Forward	BB0197	Forward	194876	195736	0.022093	protoporphyrinogen oxidase, putative		AACGAAGTTA--TAAATTATGC		lp38
T11TC155		Chrom	195075	Forward	BB0197	Forward	194876	195736	0.231395	protoporphyrinogen oxidase, putative		ATTCACTACA--TACTTCAAAA	cp9	lp28-1
T07TC218		Chrom	195213	Forward	BB0197	Forward	194876	195736	0.39186	protoporphyrinogen oxidase, putative		ATATTAGACT--TATGCTGCGG	lp5
T05TC184		Chrom	195964	Reverse	BB0198	Forward	195693	197696	0.135796	guanosine-3,5-bis(diphosphate) 3-pyrophosphohydrolase	spoT	CTGCATGACG--TACTTGAAGA	Complete
T08TC487		Chrom	202768	Forward	IR BBtRNA-Cys-1-BB0202	0	202766	202849	0.0240964	Intergenic Region	0	CAGCGCCTTC--TAAGATCAAG	Complete
T11TC205		Chrom	202797	Forward	IR BBtRNA-Cys-1-BB0202	0	202766	202849	0.373494	Intergenic Region	0	TTTTTATACT--TAAGGACATA	lp5	lp28-1
T08TC535		Chrom	202830	Reverse	IR BBtRNA-Cys-1-BB0202	0	202766	202849	0.783133	Intergenic Region	0	TTATTAAAGA--TAAATTAAAA	lp5
T07TC262	same site T07TC262, T10TC470	Chrom	202847	Reverse	IR BBtRNA-Cys-1-BB0202	0	202766	202849	0.987952	Intergenic Region	0	AAATAATACA--TATATGCTAG	cp9
T10TC470	same site T07TC262, T10TC470	Chrom	202847	Reverse	IR BBtRNA-Cys-1-BB0202	0	202766	202849	0.987952	Intergenic Region	0	AAATAATACA--TATATGCTAG	lp5
T09TC411		Chrom	202849	Forward	IR BBtRNA-Cys-1-BB0202	0	202766	202849	1	Intergenic Region	0	ATAATACATA--TATGCTAGAA		lp5
T10TC491		Chrom	202866	Reverse	BB0202	Forward	202850	204088	0.0137318	hemolysin, putative		GAATTAATCA--TAATACTACT	lp28-1
T03TC291		Chrom	202869	Forward	BB0202	Forward	202850	204088	0.0153473	hemolysin, putative		TTAATCATAA--TACTACTATT	Complete
T03TC345	same site: T03TC345, T08TC653	Chrom	202872	Forward	BB0202	Forward	202850	204088	0.0177706	hemolysin, putative		ATCATAATAC--TACTATTTAT	lp21	lp5
T08TC653	same site: T03TC345, T08TC653	Chrom	202894	Forward	BB0202	Forward	202850	204088	0.0355412	hemolysin, putative		TATTATCTGC--TATTTTCTCA	lp5
T06TC491	see T09TC377	Chrom	202919	Forward	BB0202	Forward	202850	204088	0.0557351	hemolysin, putative		TGAAACAGCT--TATACTTCAT	Not done
T09TC377	T09TC377, T09TC530; same site T10TC366, T10TC382, T10TC410, T06TC491	Chrom	202919	Forward	BB0202	Forward	202850	204088	0.0557351	hemolysin, putative		TGAAACAGCT--TATACTTCAT		cp9
T09TC530	see T09TC377	Chrom	202919	Forward	BB0202	Forward	202850	204088	0.0557351	hemolysin, putative		TGAAACAGCT--TATACTTCAT	Complete
T10TC366	see T09TC377	Chrom	202919	Reverse	BB0202	Forward	202850	204088	0.0565428	hemolysin, putative		TGAAACAGCT--TATACTTCAT		lp5
T10TC382	see T09TC377	Chrom	202919	Reverse	BB0202	Forward	202850	204088	0.0565428	hemolysin, putative		TGAAACAGCT--TATACTTCAT	lp5
T10TC410	see T09TC377	Chrom	202919	Reverse	BB0202	Forward	202850	204088	0.0565428	hemolysin, putative		TGAAACAGCT--TATACTTCAT	Complete
T05TC304		Chrom	202977	Reverse	BB0202	Forward	202850	204088	0.103393	hemolysin, putative		AAATCGGGAA--TATCCGTGTA	lp38,lp21
T06TC338		Chrom	203023	Forward	BB0202	Forward	202850	204088	0.139742	hemolysin, putative		TAATTACTAC--TATTCTTATC	lp5
T08TC125		Chrom	203039	Forward	BB0202	Forward	202850	204088	0.152666	hemolysin, putative		TATCGGCAAC--AATATATCAA	cp9,lp5		anomolous transposition event
T01P01A02		Chrom	203068	Reverse	BB0202	Forward	202850	204088	0.17609	hemolysin, putative		CAAGCACACT--TACAACAAAA	cp9,lp5
T09TC049		Chrom	203258	Forward	BB0202	Forward	202850	204088	0.329564	hemolysin, putative		TCCACTAATA--TATATAATAA	Complete
T09TC383		Chrom	203427	Reverse	BB0202	Forward	202850	204088	0.466882	hemolysin, putative		ATAGATCAAG--TAAGAGCTTC	Complete
T08TC363		Chrom	203499	Forward	BB0202	Forward	202850	204088	0.524233	hemolysin, putative		CTAAAAGATG--TAATCAAATT	lp5
T06TC525		Chrom	203539	Reverse	BB0202	Forward	202850	204088	0.557351	hemolysin, putative		CTAGAATTCC--TATATACAAA	Not done
T09TC443		Chrom	203543	Forward	BB0202	Forward	202850	204088	0.559774	hemolysin, putative		AATTCCTATA--TACAAAGGAC	lp5
T10TC523		Chrom	203568	Forward	BB0202	Forward	202850	204088	0.579968	hemolysin, putative		AGAGAACAGA--TAATTGGGAT	cp32-1,cp32-7,lp38	lp28-3
T09TC406		Chrom	203688	Forward	BB0202	Forward	202850	204088	0.676898	hemolysin, putative		ATAAAAGACA--TACTAGATAT		lp5
T07TC207	same site: T07TC207, T08TC238	Chrom	203769	Forward	BB0202	Forward	202850	204088	0.742326	hemolysin, putative		ATACTTACAA--TAGAAGACAT	Complete
T08TC238	same site: T07TC207, T08TC238	Chrom	203769	Reverse	BB0202	Forward	202850	204088	0.743134	hemolysin, putative		ATACTTACAA--TAGAAGACAT	lp5
T10TC354		Chrom	203802	Forward	BB0202	Forward	202850	204088	0.768982	hemolysin, putative		TTTGGAGCAA--TATCTGACGA		cp32-8,lp5
T06TC283		Chrom	203821	Forward	BB0202	Forward	202850	204088	0.78433	hemolysin, putative		AATACGACAT--TAAAGAGGAA	cp9,lp28-1,lp5
T10TC413		Chrom	203860	Reverse	BB0202	Forward	202850	204088	0.81664	hemolysin, putative		TCAACGACAA--TACTTACTCA	lp5
T06TC531		Chrom	203864	Reverse	BB0202	Forward	202850	204088	0.819871	hemolysin, putative		CGACAATACT--TACTCAATAC	Not done
T10TC332		Chrom	203918	Reverse	BB0202	Forward	202850	204088	0.863489	hemolysin, putative		AATTGGGATA--TCCATTAAAC	lp5		anomolous transposition event
T10TC466		Chrom	203961	Forward	BB0202	Forward	202850	204088	0.897415	hemolysin, putative		GGTGGATACT--TAATAGATCT	Complete
T06TC284		Chrom	204237	Reverse	BB0203	Forward	204137	205072	0.108021	Lambda CII stability-governing protein	hflK	AACATATTCA--TAGTAGGGCC	lp28-1,lp5
T06TC518		Chrom	204384	Reverse	BB0203	Forward	204137	205072	0.265241	Lambda CII stability-governing protein	hflK	TTTGGATTTC--TAATATCTCC	Not done
T07TC220		Chrom	204592	Reverse	BB0203	Forward	204137	205072	0.487701	Lambda CII stability-governing protein	hflK	GGGATAATAC--TATTTTTGAA		cp9
T03TC003		Chrom	204673	Forward	BB0203	Forward	204137	205072	0.573262	Lambda CII stability-governing protein	hflK	TAGATAATTA--TAATTTAGGC	Complete
T03TC008	T03TC008, T03TC098; same site T04TC375	Chrom	204789	Forward	BB0203	Forward	204137	205072	0.697326	Lambda CII stability-governing protein	hflK	AATAAATACA--TAAACGAAGG	cp32-7,lp21	lp5
T03TC098	see T03TC008	Chrom	204789	Forward	BB0203	Forward	204137	205072	0.697326	Lambda CII stability-governing protein	hflK	AATAAATACA--TAAACGAAGG	cp32-7,lp21
T04TC375	see T03TC008	Chrom	204789	Reverse	BB0203	Forward	204137	205072	0.698396	Lambda CII stability-governing protein	hflK	AATAAATACA--TAAACGAAGG	Complete
T04TC268		Chrom	205105	Forward	BB0204	Forward	205073	206044	0.0329557	Lambda CII stability-governing protein	hflC	TATTATCTAC--TATAAAGATT	Complete
T08TC040		Chrom	205114	Forward	BB0204	Forward	205073	206044	0.0422245	Lambda CII stability-governing protein	hflC	CTATAAAGAT--TATAACCTTT		lp5
T05TC393		Chrom	205528	Forward	BB0204	Forward	205073	206044	0.468589	Lambda CII stability-governing protein	hflC	CAAACGATCC--TATTCAACGT	Complete
T03TC054		Chrom	205635	Reverse	BB0204	Forward	205073	206044	0.579815	Lambda CII stability-governing protein	hflC	ATAATTCGTA--TAGCAAACAA	Complete
T07TC321		Chrom	206053	Forward	IR BB0204-BB0205	0	206045	206528	0.0165631	Intergenic Region	0	GAAAGTTTAT--TAGTATAAAT	lp5
T11TC464		Chrom	206104	Reverse	IR BB0204-BB0205	0	206045	206528	0.124224	Intergenic Region	0	ATTAATCTAT--TATTATAGAT	Not done
T09TC174		Chrom	209622	Forward	BB0208	Forward	209529	211274	0.0532951	conserved hypothetical protein		AGTTTTAAAA--TATAGCATTT	Complete
T11TC231		Chrom	209643	Reverse	BB0208	Forward	209529	211274	0.0659026	conserved hypothetical protein		TTCCCAGCTT--TACAAATTAG	Complete
T06TC227		Chrom	210001	Reverse	BB0208	Forward	209529	211274	0.27106	conserved hypothetical protein		GAACAAACAA--TAGATATTCT	cp32-9,cp9
T06TC241		Chrom	210348	Reverse	BB0208	Forward	209529	211274	0.469914	conserved hypothetical protein		TAGCTTTAAT--TATTTTTTTA	lp28-1
T05TC125		Chrom	210884	Forward	BB0208	Forward	209529	211274	0.776504	conserved hypothetical protein		ATTTCAAATT--TATATCAGAC	Complete
T08TC136	same site: T08TC136, T10TC223	Chrom	210895	Forward	BB0208	Forward	209529	211274	0.782808	conserved hypothetical protein		ATATCAGACA--TACTACTCTA	cp32-7,lp5
T10TC223	same site: T08TC136, T10TC223	Chrom	210895	Reverse	BB0208	Forward	209529	211274	0.783381	conserved hypothetical protein		ATATCAGACA--TACTACTCTA	cp9,lp5
T10P01B12		Chrom	210898	Reverse	BB0208	Forward	209529	211274	0.7851	conserved hypothetical protein		TCAGACATAC--TACTCTACCT	Not done
T07TC118		Chrom	211286	Forward	IR BB0208-BB0209	0	211275	211300	0.44	Intergenic Region	0	CTAAAATAAG--TATAATGGGA	cp9,lp5
T06P01D01		Chrom	215546	Forward	BB0211	Forward	215427	217259	0.0649563	DNA mismatch repair protein	mutL	ATTCTGGAGC--TACTAAAATT	cp32-6,lp5	cp9
T03TC297		Chrom	215596	Reverse	BB0211	Forward	215427	217259	0.0927948	DNA mismatch repair protein	mutL	AAAATCTTAA--TAATAGATAA	lp21
T10TC315		Chrom	215800	Forward	BB0211	Forward	215427	217259	0.203603	DNA mismatch repair protein	mutL	CAAATAGAAG--TAGAAAATGG	lp21,lp5
T06TC456		Chrom	216161	Forward	BB0211	Forward	215427	217259	0.400655	DNA mismatch repair protein	mutL	CTAAAAAAAG--TAAAAGACAT	lp28-1
T08TC459		Chrom	216340	Reverse	BB0211	Forward	215427	217259	0.498908	DNA mismatch repair protein	mutL	AAAAAAGAAG--TAAGATTTTA	lp5
T04TC405		Chrom	216466	Reverse	BB0211	Forward	215427	217259	0.567686	DNA mismatch repair protein	mutL	GATGATCATT--TAATAGAAAT	cp9	lp5
T07TC054		Chrom	216865	Forward	BB0211	Forward	215427	217259	0.784934	DNA mismatch repair protein	mutL	AAACTTCTAG--TACCAATTGA	lp28-1,lp5
T06TC508		Chrom	217535	Forward	BB0212	Forward	217278	218312	0.248549	hypothetical protein		AATCTACTAG--TAAATCATAT	lp21
T11P01C07	T11P01E12, T11P01G07. T11P01C07, T11P02A08, T11P02C01	Chrom	217609	Reverse	BB0212	Forward	217278	218312	0.321083	hypothetical protein		CTAGAATTAA--TATCAAAATA	Complete
T11P01E12	see T11P01C07	Chrom	217609	Reverse	BB0212	Forward	217278	218312	0.321083	hypothetical protein		CTAGAATTAA--TATCAAAATA	Not done
T11P01G07	see T11P01C07	Chrom	217609	Reverse	BB0212	Forward	217278	218312	0.321083	hypothetical protein		CTAGAATTAA--TATCAAAATA	Not done
T11P02A08	see T11P01C07	Chrom	217609	Reverse	BB0212	Forward	217278	218312	0.321083	hypothetical protein		CTAGAATTAA--TATCAAAATA	Not done
T11P02C01	see T11P01C07	Chrom	217609	Reverse	BB0212	Forward	217278	218312	0.321083	hypothetical protein		CTAGAATTAA--TATCAAAATA	Not done
T04TC440		Chrom	217699	Reverse	BB0212	Forward	217278	218312	0.408124	hypothetical protein		AAAAATTATT--TACAAAGAAT	lp5
T08TC185		Chrom	218009	Forward	BB0212	Forward	217278	218312	0.706963	hypothetical protein		AAATCAATGT--TATTACAAAA	lp28-1,lp5
T05TC158		Chrom	226998	Forward	BB0221	Reverse	227836	226610	0.683524	flagellar motor switch protein	fliG-1	AAAATCCATA--TAGCTTAAAA	Complete
T08TC068		Chrom	227214	Forward	BB0221	Reverse	227836	226610	0.507341	flagellar motor switch protein	fliG-1	TAAATAATTA--TATAATATAA	Complete
T08TC546		Chrom	227357	Forward	BB0221	Reverse	227836	226610	0.390701	flagellar motor switch protein	fliG-1	TAGATTTTCC--TAACGTTTTA	lp5
T08TC645		Chrom	227365	Forward	BB0221	Reverse	227836	226610	0.384176	flagellar motor switch protein	fliG-1	CCTAACGTTT--TATTTAATAA	Complete
T04TC063		Chrom	227426	Forward	BB0221	Reverse	227836	226610	0.334421	flagellar motor switch protein	fliG-1	GATTTCTTAG--TAACTCTTCA	lp38
T08TC578		Chrom	228543	Reverse	BB0223	Reverse	228895	228542	0.994334	conserved hypothetical protein		TAATACATAT--TAATCTAAAT	lp5
T10TC435		Chrom	228555	Forward	BB0223	Reverse	228895	228542	0.963173	conserved hypothetical protein		ATCTAAATAA--TAATAAATAG	lp5
T11TC261		Chrom	228782	Reverse	BB0223	Reverse	228895	228542	0.31728	conserved hypothetical protein		AATAATATCT--TAAATCTCTA	lp5
T10TC516		Chrom	228889	Reverse	BB0224	Reverse	229148	228864	0.908451	lipoprotein, putative		ATTAAAGCAA--TATACATACA	Complete
T08TC632		Chrom	228891	Reverse	BB0224	Reverse	229148	228864	0.901408	lipoprotein, putative		TAAAGCAATA--TACATACATA	lp5
T06TC502	same site: T06TC502, T10TC427	Chrom	228895	Reverse	BB0224	Reverse	229148	228864	0.887324	lipoprotein, putative		GCAATATACA--TACATATTTA	Not done
T10TC427	same site: T06TC502, T10TC427	Chrom	228895	Forward	BB0224	Reverse	229148	228864	0.890845	lipoprotein, putative		GCAATATACA--TACATATTTA		lp5
T05P01G01		Chrom	228899	Reverse	BB0224	Reverse	228864	229148	0.876761	lipoprotein, putative		TATACATACA--TATTTAATAA	lp5
T04TC291		Chrom	228923	Forward	BB0224	Reverse	229148	228864	0.792254	lipoprotein, putative		GCTTTAATCT--TAGATAAATT	lp5
T08TC628		Chrom	229150	Forward	IR BB0224-BB0225	0	229149	229216	0.0149254	Intergenic Region	0	TCCAGGCATA--TAACAATTCC	lp28-1,lp5
T04P01A04		Chrom	229213	Forward	IR BB0224-BB0225	0	229149	229216	0.955224	Intergenic Region	0	TAACATATTA--TATAATGTTA	Complete
T10TC325		Chrom	229314	Forward	BB0225	Forward	229217	230224	0.0963257	tRNA-dihydrouridine synthase A		AAAGTTACAT--TATATACCCC	cp9,lp28-1,lp38
T03TC027		Chrom	229555	Forward	BB0225	Forward	229217	230224	0.33565	tRNA-dihydrouridine synthase A		TGGGCAATGC--TAATCAAGTA	Complete
T09TC361		Chrom	232335	Forward	IR BB0227-BB0228	0	232323	232337	0.857143	Intergenic Region	0	ATTAAAGACA--TAAATGAAAA	lp21	lp5
T06TC362		Chrom	232615	Forward	BB0228	Forward	232338	235253	0.0950257	peptidase M16 inactive domain family		AACACATTTT--TAAATGCAAT	lp21,lp5
T09TC296		Chrom	232709	Forward	BB0228	Forward	232338	235253	0.127273	peptidase M16 inactive domain family		ATGCCGATTC--TATATTTAAC	lp5
T07TC356		Chrom	232814	Forward	BB0228	Forward	232338	235253	0.163293	peptidase M16 inactive domain family		AAATGAAGGG--TAGCTATTCA	lp5
T09TC362		Chrom	232840	Reverse	BB0228	Forward	232338	235253	0.172556	peptidase M16 inactive domain family		AATTCTCTAA--TAAATGAAAT	lp21
T11TC390		Chrom	233078	Forward	BB0228	Forward	232338	235253	0.253859	peptidase M16 inactive domain family		GCAATGTCAA--TATTAACATA	Not done
T08TC455		Chrom	233332	Reverse	BB0228	Forward	232338	235253	0.341338	peptidase M16 inactive domain family		AATACAGATT--TAAAAGAATC	Complete
T08TC671		Chrom	233589	Forward	BB0228	Forward	232338	235253	0.42916	peptidase M16 inactive domain family		ACAAACAAGC--TACTATATAA	lp21
T08TC591		Chrom	233606	Reverse	BB0228	Forward	232338	235253	0.435334	peptidase M16 inactive domain family		TAAATGAAAT--TACAAATAAA		lp5
T08TC615		Chrom	233858	Forward	BB0228	Forward	232338	235253	0.521441	peptidase M16 inactive domain family		CTAAAGCAGA--TATAGCAAAA		lp5
T09TC076		Chrom	233932	Forward	BB0228	Forward	232338	235253	0.546827	peptidase M16 inactive domain family		CTTAATGAAA--TAAAAGAGCT	cp9
T07TC474		Chrom	234027	Forward	BB0228	Forward	232338	235253	0.579417	peptidase M16 inactive domain family		AAAAGAAGAT--TACATATACC	Complete
T08TC549	same site: T08TC549, T10P02G06	Chrom	234954	Reverse	BB0228	Forward	232338	235253	0.89777	peptidase M16 inactive domain family		TGATGAGATT--TATACCTATT	Complete
T10P02G06	same site: T08TC549, T10P02G06	Chrom	234954	Reverse	BB0228	Forward	232338	235253	0.89777	peptidase M16 inactive domain family		TGATGAGATT--TATACCTATT	Complete
T10TC373		Chrom	234983	Reverse	BB0228	Forward	232338	235253	0.907719	peptidase M16 inactive domain family		TAATAGGAAC--TAACATCTAT		lp5
T10P01C11		Chrom	238777	Forward	BB0234	Reverse	239128	238301	0.424426	conserved hypothetical integral membrane protein		TTAAGCTCTT--TAAATAATTC	Not done
T08P02A01		Chrom	245552	Forward	IR BB0239-BB0240	0	245395	245789	0.398477	Intergenic Region	0	TTAAAATTCT--TAAATTATTG	Not done
T08TC322		Chrom	245783	Forward	IR BB0239-BB0240	0	245395	245789	0.984772	Intergenic Region	0	GATAAGGAGA--TATAATTATG	lp5
T08TC577		Chrom	245881	Reverse	BB0240	Forward	245790	246554	0.120419	glycerol uptake facilitator	glpF	GCAATGACAG--TATTATTTTC	lp5	lp28-1
T09TC379		Chrom	245917	Reverse	BB0240	Forward	245790	246554	0.167539	glycerol uptake facilitator	glpF	CCAGGAGAAA--TAATAAAAGG	Complete
T08TC132		Chrom	245939	Forward	BB0240	Forward	245790	246554	0.195026	glycerol uptake facilitator	glpF	GATATACAAA--TATAGTATTT	Complete
T09TC330	T09TC330, T09TC376	Chrom	246023	Forward	BB0240	Forward	245790	246554	0.304974	glycerol uptake facilitator	glpF	ACCCAGCTGT--TAGCATAGGA	Complete
T09TC376	T09TC330, T09TC376	Chrom	246023	Forward	BB0240	Forward	245790	246554	0.304974	glycerol uptake facilitator	glpF	ACCCAGCTGT--TAGCATAGGA	lp21
T10TC407		Chrom	246328	Forward	BB0240	Forward	245790	246554	0.704188	glycerol uptake facilitator	glpF	CCTTTTATTG--TAGGAGCAGT		lp5
T11TC356		Chrom	246452	Forward	BB0240	Forward	245790	246554	0.866492	glycerol uptake facilitator	glpF	ATCACGGATT--TAACAATCTA	Not done
T06TC158	same site: T06TC158, T09TC416	Chrom	246460	Forward	BB0240	Forward	245790	246554	0.876963	glycerol uptake facilitator	glpF	TTTAACAATC--TAAGTATAGT	lp21
T09TC416	same site: T06TC158, T09TC416	Chrom	246460	Reverse	BB0240	Forward	245790	246554	0.878272	glycerol uptake facilitator	glpF	TTTAACAATC--TAAGTATAGT	cp32-3,lp28-1	lp5
T08TC449		Chrom	246466	Forward	BB0240	Forward	245790	246554	0.884817	glycerol uptake facilitator	glpF	AATCTAAGTA--TAGTTATTGT	lp5
T11TC210		Chrom	246470	Reverse	BB0240	Forward	245790	246554	0.891361	glycerol uptake facilitator	glpF	TAAGTATAGT--TATTGTACCA		lp28-1
T11TC263		Chrom	246596	Reverse	BB0241	Forward	246597	248102	0	glycerol kinase	glpK	AAGGAAAAAC--TATGAAATAC	Complete
T06TC395		Chrom	246610	Forward	BB0241	Forward	246597	248102	0.00863787	glycerol kinase	glpK	AAATACATTT--TATCTATTGA	Not done
T08TC443		Chrom	246892	Reverse	BB0241	Forward	246597	248102	0.196678	glycerol kinase	glpK	TACAATGCAA--TAGTATGGCA	Complete
T09TC455		Chrom	247033	Forward	BB0241	Forward	246597	248102	0.289701	glycerol kinase	glpK	TTGGATAATG--TAGAAGGTGC	lp5
T09TC353		Chrom	247662	Forward	BB0241	Forward	246597	248102	0.707641	glycerol kinase	glpK	CTGGGATTCT--TATGCAAGAG	Complete
T06TC285		Chrom	247987	Forward	BB0241	Forward	246597	248102	0.923588	glycerol kinase	glpK	CTTTGGCAAG--TAGACAAGAT	lp5
T10TC402		Chrom	248140	Forward	IR BB0241-BB0242	0	248103	248155	0.711538	Intergenic Region	0	AACAAAAATA--TACTGGTAAC	lp5
T11TC163		Chrom	248196	Reverse	BB0242	Forward	248156	248434	0.147482	conserved hypothetical protein		AAACAACATA--TAATAAAAAT	lp5
T08TC663		Chrom	248262	Reverse	BB0242	Forward	248156	248434	0.384892	conserved hypothetical protein		TTTTTTCATC--TACATCTATT	Complete
T08TC547	same site: T08TC547, T09TC464	Chrom	248356	Reverse	BB0242	Forward	248156	248434	0.723022	conserved hypothetical protein		AAATGATTAA--TAATATATTA	lp5
T09TC464	same site: T08TC547, T09TC464	Chrom	248356	Reverse	BB0242	Forward	248156	248434	0.723022	conserved hypothetical protein		AAATGATTAA--TAATATATTA	lp5
T09TC415		Chrom	248417	Forward	BB0242	Forward	248156	248434	0.938849	conserved hypothetical protein		GCAATTGGTC--TATAGTGCTA		lp5
T03P01A04	T03P01A04, T03P01A05, T03P01A08, T03P01A10	Chrom	248474	Reverse	IR BB0242-BB0243	0	248435	248505	0.571429	Intergenic Region	0	TTCAATCTAG--TATTTAACTA	cp32-6,lp5
T03P01A05	T03P01A04, T03P01A05, T03P01A08, T03P01A10	Chrom	248474	Reverse	IR BB0242-BB0243	0	248435	248505	0.571429	Intergenic Region	0	TTCAATCTAG--TATTTAACTA	Not done
T03P01A08	T03P01A04, T03P01A05, T03P01A08, T03P01A10	Chrom	248474	Reverse	IR BB0242-BB0243	0	248435	248505	0.571429	Intergenic Region	0	TTCAATCTAG--TATTTAACTA	Not done
T03P01A10	T03P01A04, T03P01A05, T03P01A08, T03P01A10	Chrom	248474	Reverse	IR BB0242-BB0243	0	248435	248505	0.571429	Intergenic Region	0	TTCAATCTAG--TATTTAACTA	cp32-6,lp5
T09TC430		Chrom	248839	Forward	BB0243	Forward	248506	250089	0.21036	glycerol-3-phosphate dehydrogenase, anaerobic	glpA	CACGCCTATT--TATAATGTTT	lp5
T11TC141		Chrom	248863	Reverse	BB0243	Forward	248506	250089	0.226153	glycerol-3-phosphate dehydrogenase, anaerobic	glpA	AATACCTTAT--TATTATTTTG	Complete
T11TC511		Chrom	248973	Reverse	BB0243	Forward	248506	250089	0.295641	glycerol-3-phosphate dehydrogenase, anaerobic	glpA	CTCCCAATAT--TAAAACAGAG	Not done
T10TC465		Chrom	249002	Forward	BB0243	Forward	248506	250089	0.313329	glycerol-3-phosphate dehydrogenase, anaerobic	glpA	TGCTCTGTTC--TATATTACGA	Complete
T08TC285		Chrom	249084	Forward	BB0243	Forward	248506	250089	0.36513	glycerol-3-phosphate dehydrogenase, anaerobic	glpA	GCATTGCCCT--TAACTATACA	lp5
T08TC555	T08TC555, T08TC654	Chrom	249088	Reverse	BB0243	Forward	248506	250089	0.368288	glycerol-3-phosphate dehydrogenase, anaerobic	glpA	TGCCCTTAAC--TATACAGAAC	Complete
T08TC654	T08TC555, T08TC654	Chrom	249088	Reverse	BB0243	Forward	248506	250089	0.368288	glycerol-3-phosphate dehydrogenase, anaerobic	glpA	TGCCCTTAAC--TATACAGAAC	Complete
T11TC294	T11TC294, T11TC296	Chrom	249251	Forward	BB0243	Forward	248506	250089	0.470625	glycerol-3-phosphate dehydrogenase, anaerobic	glpA	GAAAAAGCCT--TAAACATCAT	lp28-1,lp5
T11TC296	T11TC294, T11TC296	Chrom	249251	Forward	BB0243	Forward	248506	250089	0.470625	glycerol-3-phosphate dehydrogenase, anaerobic	glpA	GAAAAAGCCT--TAAACATCAT	Complete
T04TC219		Chrom	249605	Reverse	BB0243	Forward	248506	250089	0.694883	glycerol-3-phosphate dehydrogenase, anaerobic	glpA	AAAATATTTA--TATCAGATTC		lp5
T10TC361		Chrom	249621	Forward	BB0243	Forward	248506	250089	0.704359	glycerol-3-phosphate dehydrogenase, anaerobic	glpA	ATTCAAATCT--TATTACAATA	lp5
T11TC212		Chrom	249624	Reverse	BB0243	Forward	248506	250089	0.706886	glycerol-3-phosphate dehydrogenase, anaerobic	glpA	CAAATCTTAT--TACAATAGCG	lp5
T11TC204		Chrom	249689	Forward	BB0243	Forward	248506	250089	0.747315	glycerol-3-phosphate dehydrogenase, anaerobic	glpA	CTTAAGGCCA--TAGAACAAAA		lp28-1,lp5
T08TC689		Chrom	250672	Reverse	BB0245	Reverse	251211	250657	0.971119	hypothetical protein		TACTTTCATC--TATTTTGTTC	lp5
T06TC003		Chrom	252806	Reverse	BB0247	Forward	252434	253039	0.616529	non-canonical purine NTP pyrophosphatase, RdgB/HAM1 family		CAACATAAGC--TATATATCAA	lp28-1,lp5
T11TC517		Chrom	259038	Forward	BB0252	Forward	259000	261303	0.0165002	conserved hypothetical integral membrane protein		ATAAAGGAAT--TATATTCACA	Not done
T09TC384		Chrom	259758	Forward	BB0252	Forward	259000	261303	0.329136	conserved hypothetical integral membrane protein		TACAATCCCC--TATTACAGTG	lp21
T09TC378		Chrom	259794	Reverse	BB0252	Forward	259000	261303	0.345202	conserved hypothetical integral membrane protein		TTGTTTTACT--TATTTCAATC		lp5
T10TC140		Chrom	259820	Reverse	BB0252	Forward	259000	261303	0.356492	conserved hypothetical integral membrane protein		GCCAATGCTG--TACATATAAT	lp5
T08TC480		Chrom	259826	Reverse	BB0252	Forward	259000	261303	0.359097	conserved hypothetical integral membrane protein		GCTGTACATA--TAATAAATGA	lp5
T05TC444		Chrom	260598	Forward	BB0252	Forward	259000	261303	0.693878	conserved hypothetical integral membrane protein		CTAAGGACAA--TAAAAGAATG	cp9
T05TC510		Chrom	260637	Forward	BB0252	Forward	259000	261303	0.710812	conserved hypothetical integral membrane protein		CATTAATATC--TATCATAGTA	lp5
T06TC424		Chrom	260734	Forward	BB0252	Forward	259000	261303	0.752931	conserved hypothetical integral membrane protein		AAATAATAAA--TATCATTTCT	Not done
T05TC367		Chrom	260752	Forward	BB0252	Forward	259000	261303	0.760747	conserved hypothetical integral membrane protein		CTCAGGTGTT--TATGATAAGG		lp5
T04TC382		Chrom	260772	Reverse	BB0252	Forward	259000	261303	0.769865	conserved hypothetical integral membrane protein		TATTAATAGC--TAAAACAATG	Complete
T03TC216		Chrom	261083	Forward	BB0252	Forward	259000	261303	0.904472	conserved hypothetical integral membrane protein		ATACCCAATG--TATTTAATGG	cp9,lp5
T11TC490		Chrom	261260	Forward	BB0252	Forward	259000	261303	0.981329	conserved hypothetical integral membrane protein		AAACCTAGAG--TAAAGCTAGC	Not done
T11TC160		Chrom	261266	Reverse	BB0252	Forward	259000	261303	0.984368	conserved hypothetical integral membrane protein		AGAGTAAAGC--TAGCCTCAAA	lp5	lp28-1
T05TC512		Chrom	264054	Forward	BB0254	Forward	263988	266114	0.0310442	single-stranded-DNA-specific exonuclease	recJ	TGCTAAGCAA--TATAATATCA	lp21
T07TC387		Chrom	264274	Forward	BB0254	Forward	263988	266114	0.134525	single-stranded-DNA-specific exonuclease	recJ	GCAACAATAA--TAATGTACGA	Complete
T07TC022		Chrom	265453	Forward	BB0254	Forward	263988	266114	0.689087	single-stranded-DNA-specific exonuclease	recJ	TATGATAACA--ATACTCCAAA	Not done		anomolous tranposition event
T05TC051		Chrom	265655	Forward	BB0254	Forward	263988	266114	0.784102	single-stranded-DNA-specific exonuclease	recJ	CAGCTGGATT--TACGCTGCAT	lp28-1	lp5
T07TC129		Chrom	265756	Forward	BB0254	Forward	263988	266114	0.831609	single-stranded-DNA-specific exonuclease	recJ	TCAATACCAA--TAGATGCTAT	cp9,lp5
T05TC167		Chrom	266110	Forward	BB0255	Forward	266095	267051	0.0156904	M23 peptidase domain protein		CAAATCAATG--TATAGAATAC	lp5
T05TC597		Chrom	266184	Reverse	BB0255	Forward	266095	267051	0.0941423	M23 peptidase domain protein		TAATAAATAC--TATTCCTAAA	cp9,lp21,lp5
T09TC367		Chrom	266627	Reverse	BB0255	Forward	266095	267051	0.557531	M23 peptidase domain protein		CAATACATTG--TAACAAGCCT		lp5
T11TC311		Chrom	267273	Forward	BB0256	Forward	267066	267275	0.990431	ribosomal protein S21	rpsU	AACTAATAGA--TAGATCGCAC	lp5
T06TC150	see T11P01B12	Chrom	273891	Reverse	BB0261	Forward	273854	275236	0.0274964	tetratricopeptide repeat domain protein		TCATTGACAG--TATTTATTTT	lp28-1
T08P01B06	see T11P01B12	Chrom	273891	Forward	BB0261	Forward	273854	275236	0.0267728	tetratricopeptide repeat domain protein		TCATTGACAG--TATTTATTTT	Not done
T11P01B12	T11P01B12, T11P01F02, T11P01G12; same site: T06TC150, T08P01B06	Chrom	273891	Forward	BB0261	Forward	273854	275236	0.0267728	tetratricopeptide repeat domain protein		TCATTGACAG--TATTTATTTT	Not done
T11P01F02	see T11P01B12	Chrom	273891	Forward	BB0261	Forward	273854	275236	0.0267728	tetratricopeptide repeat domain protein		TCATTGACAG--TATTTATTTT	Not done
T11P01G12	see T11P01B12	Chrom	273891	Forward	BB0261	Forward	273854	275236	0.0267728	tetratricopeptide repeat domain protein		TCATTGACAG--TATTTATTTT	lp5
T05TC026		Chrom	274650	Reverse	BB0261	Forward	273854	275236	0.5767	tetratricopeptide repeat domain protein		AAAGAAATAA--TAAAAGTAAA		lp5
T11TC067		Chrom	275620	Forward	BB0262	Reverse	276496	275243	0.699122	M23 peptidase domain protein		ACAGGATAAA--TAAAAGTCTC	Complete
T11TC243		Chrom	276514	Forward	IR BB0262-BB0263	0	276497	276557	0.283333	Intergenic Region	0	TATTTCATTA--TACAATAGAA	lp5
T10TC090		Chrom	276901	Reverse	BB0263	Forward	276558	277064	0.679842	signal peptidase I	lepB-3	ATACATGATT--TAAACTTTAA		lp5
T06TC349		Chrom	277775	Forward	BB0264	Reverse	278565	277090	0.535593	heat shock protein 70	dnaK-1	TTTAAGATTA--TAATTCAAAT	lp5
T06TC583		Chrom	278130	Reverse	BB0264	Reverse	278565	277090	0.294237	heat shock protein 70	dnaK-1	GTTGGTTCAT--TAAGTATGGC	Not done
T05TC397		Chrom	278204	Forward	BB0264	Reverse	278565	277090	0.244746	heat shock protein 70	dnaK-1	CTCAGAAAAA--TAGGCAGGGA	Complete
T11TC234		Chrom	278479	Forward	BB0264	Reverse	278565	277090	0.0583051	heat shock protein 70	dnaK-1	CCCTTTCATT--TAATATTATC	Complete
T06TC353		Chrom	278545	Forward	BB0265	Reverse	279058	278537	0.984645	conserved hypothetical protein		GATCAATACC--TATCCATTTT	cp9
T10TC210		Chrom	278603	Reverse	BB0265	Reverse	279058	278537	0.871401	conserved hypothetical protein		CAACCTCACC--TAAATCTAAC	lp38
T09TC515		Chrom	278644	Forward	BB0265	Reverse	279058	278537	0.794626	conserved hypothetical protein		TCAAAAGACA--TACCTTGTTC	Complete
T04TC289		Chrom	278683	Forward	BB0265	Reverse	279058	278537	0.71977	conserved hypothetical protein		TTGCGAACAT--TATAACTTTC	cp32-6,cp9,lp5
T10TC533		Chrom	279052	Forward	BB0265	Reverse	279058	278537	0.0115163	conserved hypothetical protein		TAAAAAACAA--TAAACATATA	Complete
T05TC031		Chrom	279140	Reverse	BB0266	Reverse	279386	279078	0.795455	conserved hypothetical protein		GGATATAAAC--TAAGCATCAC	Not done
T03TC091		Chrom	279380	Forward	BB0266	Reverse	279386	279078	0.0194805	conserved hypothetical protein		AATGTATCCA--TATACAAATC	lp5
T06TC470		Chrom	279478	Reverse	BB0267	Reverse	281311	279407	0.962185	conserved hypothetical protein		GTAACGTTGT--TATAATCTTT	Not done
T09TC371		Chrom	279511	Reverse	BB0267	Reverse	281311	279407	0.944853	conserved hypothetical protein		AAAGCATTCT--TAATATAAAG	cp32-6,lp21
T07TC278		Chrom	280264	Forward	BB0267	Reverse	281311	279407	0.549895	conserved hypothetical protein		ACTAAATAAA--TATTATGAAC	lp5	cp9
T10P01E03	T10P01E03, T10P01F05	Chrom	280280	Forward	BB0267	Reverse	281311	279407	0.541492	conserved hypothetical protein		GAACAGATAT--TACACCATCT	Not done
T10P01F05	T10P01E03, T10P01F05	Chrom	280280	Forward	BB0267	Reverse	281311	279407	0.541492	conserved hypothetical protein		GAACAGATAT--TACACCATCT	Not done
T11TC147		Chrom	280599	Reverse	BB0267	Reverse	281311	279407	0.373424	conserved hypothetical protein		AGGCTCGCCA--TAAACAGGAT	lp5
T11TC174		Chrom	281469	Reverse	BB0268	Reverse	281793	281314	0.674322	conserved hypothetical protein		AAATCACCAC--TACTACTGAT	lp28-1,lp5
T09TC041		Chrom	289112	Forward	BB0276	Reverse	289583	288957	0.752396	flagellar biosynthesis protein	fliZ	GCAGAATCAT--TAATTTTGCT		lp5
T04TC041		Chrom	297188	Forward	BB0287	Reverse	297469	297038	0.651972	flagellar protein	flbA	TATATTTATC--TACATAAACA	Complete
T06TC447		Chrom	297211	Reverse	BB0287	Reverse	297469	297038	0.596288	flagellar protein	flbA	TAACATTTGT--TATAATGCTT	Not done
T10TC091		Chrom	297745	Forward	BB0288	Reverse	298776	297466	0.787023	flagellum-specific ATP synthase	fliI	TTGAAGGATA--TATTCCCCTG	lp28-2,lp5
T05TC243		Chrom	299448	Reverse	BB0289	Reverse	299715	298795	0.28913	flagellar assembly protein	fliH	GCCTTTGCCT--TAGCTTCTTC	lp5
T05TC319		Chrom	303740	Forward	BB0294	Reverse	303740	303333	0	flagellar basal-body rod protein	flgB	AAATCATTCA--(TATG)GAAACC	cp9,lp5		possible genome sequence error (AATT-->TATG)
T07TC058		Chrom	303827	Forward	BB0295	Reverse	305141	303774	0.961229	heat shock protein HslVU, ATPase subunit HslU	hslU	ATTTTTTTAT--TAACATAGTC	lp5
T04TC283		Chrom	303832	Reverse	BB0295	Reverse	305141	303774	0.95684	heat shock protein HslVU, ATPase subunit HslU	hslU	TTTATTAACA--TAGTCCAAGT	Complete
T06TC546		Chrom	303900	Forward	BB0295	Reverse	305141	303774	0.907827	heat shock protein HslVU, ATPase subunit HslU	hslU	CTGCAAGCAC--TATTTCCATA	Not done
T03TC241		Chrom	304039	Reverse	BB0295	Reverse	305141	303774	0.805413	heat shock protein HslVU, ATPase subunit HslU	hslU	CATCGCAACA--TATTGTTTTA	lp5
T05TC246		Chrom	304149	Reverse	BB0295	Reverse	305141	303774	0.724945	heat shock protein HslVU, ATPase subunit HslU	hslU	GCTCGGGTAT--TAAATCAGAA	lp5
T09TC066		Chrom	304713	Forward	BB0295	Reverse	305141	303774	0.313094	heat shock protein HslVU, ATPase subunit HslU	hslU	GACTATCAAC--TATTCTCTCC	lp5
T03TC273		Chrom	304759	Reverse	BB0295	Reverse	305141	303774	0.278713	heat shock protein HslVU, ATPase subunit HslU	hslU	TACAGTACTA--TACATCTCTT	cp32-6,lp5
T05TC056		Chrom	305052	Reverse	BB0295	Reverse	305141	303774	0.0643745	heat shock protein HslVU, ATPase subunit HslU	hslU	CGTCTTGACC--TATTATATAT	lp5
T08TC279		Chrom	305154	Reverse	BB0296	Reverse	305661	305113	0.923358	ATP-dependent protease HslV	hslV	TTAGAATTAG--TATATATACA		lp5
T03TC016		Chrom	305158	Forward	BB0296	Reverse	305661	305113	0.917883	ATP-dependent protease HslV	hslV	AATTAGTATA--TATACACACT	cp32-3,cp9,lp5
T09TC058		Chrom	305331	Reverse	BB0296	Reverse	305661	305113	0.600365	ATP-dependent protease HslV	hslV	ATCAAAAGAA--TATTGTTAGA	cp9
T06TC027		Chrom	305484	Reverse	BB0296	Reverse	305661	305113	0.321168	ATP-dependent protease HslV	hslV	TCAAAAAGAG--TAATTGCATC	lp28-1,lp5
T11TC368		Chrom	305882	Forward	BB0297	Reverse	306618	305671	0.777191	smg protein		ATCATAAACA--TAAACATCAA	Not done
T06TC062		Chrom	305948	Reverse	BB0297	Reverse	306618	305671	0.706441	smg protein		CAAGGGTGCA--TATGTTATAA	lp5
T07TC214		Chrom	306154	Reverse	BB0297	Reverse	306618	305671	0.488912	smg protein		TATTCTCATT--TATTGCTGCT	lp5
T11TC358		Chrom	306375	Forward	BB0297	Reverse	306618	305671	0.2566	smg protein		TTAAGCTTAT--TAGGATAAGA	Complete
T05TC032		Chrom	306537	Forward	BB0297	Reverse	306618	305671	0.0855333	smg protein		ATAACATTAT--TAAAATCAAA	cp32-7
T04TC309	same site:T04TC309, T06TC098	Chrom	321395	Reverse	BB0315	Forward	321352	322038	0.0641399	conserved hypothetical protein		GGCTTGATAA--TAAATGTTTG	lp5
T06TC098	same site:T04TC309, T06TC098	Chrom	321395	Reverse	BB0315	Forward	321352	322038	0.0641399	conserved hypothetical protein		GGCTTGATAA--TAAATGTTTG	Complete
T05TC543		Chrom	321684	Forward	BB0315	Forward	321352	322038	0.483965	conserved hypothetical protein		ACTTTTTAGA--TATCTCTTGG	lp5
T07TC142	same site: T07TC142, T08TC129	Chrom	323207	Reverse	BB0317	Reverse	323779	322847	0.612661	conserved hypothetical integral membrane protein		TATTGCTTAA--TATTTCAAGC	lp28-1,lp5
T08TC129	same site: T07TC142, T08TC129	Chrom	323207	Forward	BB0317	Reverse	323779	322847	0.613734	conserved hypothetical integral membrane protein		TATTGCTTAA--TATTTCAAGC		lp5
T05TC132	same site: T05TC132, T07TC486	Chrom	323719	Reverse	BB0317	Reverse	323779	322847	0.0633047	conserved hypothetical integral membrane protein		AAAAAATAGC--TAATACTTAA	lp5
T07TC486	same site: T05TC132, T07TC486	Chrom	323719	Reverse	BB0317	Reverse	323779	322847	0.0633047	conserved hypothetical integral membrane protein		AAAAAATAGC--TAATACTTAA	lp5	lp17
T05TC471		Chrom	323827	Reverse	BB0318	Reverse	325236	323776	0.964384	methylgalactoside ABC transporter, ATP-binding protein	mglA	TTTCTCTAGA--TACGTTTAAC	lp5
T10P01G10	T10P01G10, T10P01H10	Chrom	323937	Forward	BB0318	Reverse	325236	323776	0.889726	methylgalactoside ABC transporter, ATP-binding protein	mglA	TTTGAATAAT--TACGAATAGC	Not done
T10P01H10	T10P01G10, T10P01H10	Chrom	323937	Forward	BB0318	Reverse	325236	323776	0.889726	methylgalactoside ABC transporter, ATP-binding protein	mglA	TTTGAATAAT--TACGAATAGC	Not done
T05TC113		Chrom	324161	Forward	BB0318	Reverse	325236	323776	0.736301	methylgalactoside ABC transporter, ATP-binding protein	mglA	CTGATTAATG--TAAGATTGCC	lp28-1,lp28-2,lp5
T10TC044		Chrom	324814	Forward	BB0318	Reverse	325236	323776	0.289041	methylgalactoside ABC transporter, ATP-binding protein	mglA	CTTTAATATT--TAAATCTTTA	cp9,lp5
T10TC055		Chrom	325021	Forward	BB0318	Reverse	325236	323776	0.14726	methylgalactoside ABC transporter, ATP-binding protein	mglA	TAGCTTTATC--TACATTCCAA		lp5
T04TC292		Chrom	325274	Forward	BB0319	Reverse	326288	325236	0.963878	exported protein	tpn38b	CCATTTGCAC--TAACCTCTTC	lp28-1	lp5
T07TC294		Chrom	325529	Forward	BB0319	Reverse	326288	325236	0.721483	exported protein	tpn38b	ACTGCAGAGA--TATTATTCTC	lp5	lp17
T06TC392		Chrom	325858	Forward	BB0319	Reverse	326288	325236	0.408745	exported protein	tpn38b	TGCTACATTA--TAAGAAACTG	Not done
T06TC369		Chrom	325930	Forward	BB0319	Reverse	326288	325236	0.340304	exported protein	tpn38b	AGTATAAGGA--TAATTACTTG	lp5
T07TC296	T07TC296, T07TC359	Chrom	326125	Forward	BB0319	Reverse	326288	325236	0.154943	exported protein	tpn38b	CATTTCTTTA--TAAGATGGAG	lp5
T07TC359	see T07TC296	Chrom	326125	Forward	BB0319	Reverse	326288	325236	0.154943	exported protein	tpn38b	CATTTCTTTA--TAAGATGGAG		lp38,lp5
T05TC100		Chrom	326310	Reverse	IR BB0319-BB0320	0	326289	326324	0.628571	Intergenic Region	0	ATCCTTTTAT--TAATTATTAT	cp32-6,cp9,lp5
T10P02E06		Chrom	326339	Reverse	BB0320	Reverse	326432	326325	0.859813	conserved hypothetical protein		TTTAATGCCA--TAAAAGTTAA	cp32-1, lp28-1, lp5	lp17
T07TC019		Chrom	327328	Forward	BB0322	Reverse	327757	326699	0.405482	conserved hypothetical protein		TGTCTGATGC--TACCCTTGTA	Complete
T09TC208		Chrom	327694	Reverse	BB0322	Reverse	327757	326699	0.0586011	conserved hypothetical protein		CTAACAACAC--TAACTCTACC	lp5
T06P01B08	same site: T06P01B08, T09TC462	Chrom	327716	Reverse	BB0322	Reverse	327757	326699	0.0378072	conserved hypothetical protein		CTATTTCTTT--TACAACTGCC	Not done
T09TC462	same site: T06P01B08, T09TC462	Chrom	327716	Forward	BB0322	Reverse	327757	326699	0.0387524	conserved hypothetical protein		CTATTTCTTT--TACAACTGCC	Complete
T07TC501		Chrom	329412	Forward	BB0324	Forward	329262	329621	0.417827	conserved hypothetical protein		TTTAAAAGCA--TACGAAAAAA	lp5
T07TC228		Chrom	329860	Forward	BB0325	Reverse	330752	329643	0.804328	conserved hypothetical protein		AACATTAACA--TACTTAAGAA	Complete
T08TC011		Chrom	330336	Forward	BB0325	Reverse	330752	329643	0.375113	conserved hypothetical protein		TTAATACTTC--TAAGTCAATA	lp38
T07TC188	primer 5275	Chrom	330404	Forward	BB0325	Reverse	330752	329643	0.313796	conserved hypothetical protein		GGAATCAATA--TATGAAAAGC	Complete
T08TC090		Chrom	334827	Reverse	IR BB0327-BB0328	0	334516	334918	0.778055	Intergenic Region	0	ACTGGAGGCA--TACATATTTA	Complete		Revised 3' end to match GenBank NC_001318.1 (110513)
T11TC050		Chrom	335198	Forward	BB0328	Forward	334919	336508	0.176322	oligopeptide ABC transporter, periplasmic binding protein	oppA-1	TGGAATTATT--TACACATTTA	cp9		Revised 5' end to match GenBank NC_001318.1 (110513)
T03TC095		Chrom	335334	Reverse	BB0328	Forward	334919	336508	0.261965	oligopeptide ABC transporter, periplasmic binding protein	oppA-1	AAATCTACAA--TAAAAAATGC	Complete		Revised 5' end to match GenBank NC_001318.1 (110513)
T08P01C07	T08P01C07, T08P01E03, T08P02H02	Chrom	335491	Forward	BB0328	Forward	334919	336508	0.360831	oligopeptide ABC transporter, periplasmic binding protein	oppA-1	TTCCAATGCA--TATTGTTGAA	Not done		Revised 5' end to match GenBank NC_001318.1 (110513)
T08P01E03	T08P01C07, T08P01E03, T08P02H02	Chrom	335491	Forward	BB0328	Forward	334919	336508	0.360831	oligopeptide ABC transporter, periplasmic binding protein	oppA-1	TTCCAATGCA--TATTGTTGAA	Not done		Revised 5' end to match GenBank NC_001318.1 (110513)
T08P02H02	T08P01C07, T08P01E03, T08P02H02	Chrom	335491	Forward	BB0328	Forward	334919	336508	0.360831	oligopeptide ABC transporter, periplasmic binding protein	oppA-1	TTCCAATGCA--TATTGTTGAA	Not done		Revised 5' end to match GenBank NC_001318.1 (110513)
T06TC172		Chrom	335793	Forward	BB0328	Forward	334919	336508	0.551008	oligopeptide ABC transporter, periplasmic binding protein	oppA-1	ATGGCATACA--TAGCATTCAA	Complete		Revised 5' end to match GenBank NC_001318.1 (110513)
T08TC111		Chrom	335878	Forward	BB0328	Forward	334919	336508	0.604534	oligopeptide ABC transporter, periplasmic binding protein	oppA-1	AAACTTTAAC--TAAAGTAGTT		lp5	Revised 5' end to match GenBank NC_001318.1 (110513)
T05TC102		Chrom	335961	Reverse	BB0328	Forward	334919	336508	0.656801	oligopeptide ABC transporter, periplasmic binding protein	oppA-1	AAAAATTTAA--TACTATTTGA	lp5		Revised 5' end to match GenBank NC_001318.1 (110513)
T04TC011		Chrom	336241	Reverse	BB0328	Forward	334919	336508	0.833123	oligopeptide ABC transporter, periplasmic binding protein	oppA-1	ACAGCTTATT--TACAACAGAA	cp9		Revised 5' end to match GenBank NC_001318.1 (110513)
T06TC543		Chrom	336406	Forward	BB0328	Forward	334919	336508	0.937028	oligopeptide ABC transporter, periplasmic binding protein	oppA-1	CACCTTTATA--TATACCCAAA	Not done		Revised 5' end to match GenBank NC_001318.1 (110513)
T08TC622		Chrom	336463	Forward	BB0328	Forward	334919	336508	0.972922	oligopeptide ABC transporter, periplasmic binding protein	oppA-1	GGGTACCAAA--TATCGCAGAA	Complete		Revised 5' end to match GenBank NC_001318.1 (110513)
T05TC551		Chrom	336493	Forward	BB0328	Forward	334919	336508	0.991814	oligopeptide ABC transporter, periplasmic binding protein	oppA-1	ATGAAGATAT--TAAAACTAAA	cp9,lp5		Revised 5' end to match GenBank NC_001318.1 (110513)
T11P01B06	T11P01B06, T11P02A07, T11P02C02, T11P02C09, T11P01H03, T11P01H11	Chrom	336524	Reverse	IR BB0328-BB0329	0	336509	336628	0.134454	Intergenic Region	0	TTAAGTAAAA--TAAGTAATTT	cp32-6
T11P01H03	see T11P01B06	Chrom	336524	Reverse	IR BB0328-BB0329	0	336509	336628	0.134454	Intergenic Region	0	TTAAGTAAAA--TAAGTAATTT	Not done
T11P01H11	see T11P01B06	Chrom	336524	Reverse	IR BB0328-BB0329	0	336509	336628	0.134454	Intergenic Region	0	TTAAGTAAAA--TAAGTAATTT	Not done
T11P02A07	see T11P01B06	Chrom	336524	Reverse	IR BB0328-BB0329	0	336509	336628	0.134454	Intergenic Region	0	TTAAGTAAAA--TAAGTAATTT	Not done
T11P02C02	see T11P01B06	Chrom	336524	Reverse	IR BB0328-BB0329	0	336509	336628	0.134454	Intergenic Region	0	TTAAGTAAAA--TAAGTAATTT	Not done
T11P02C09	see T11P01B06	Chrom	336524	Reverse	IR BB0328-BB0329	0	336509	336628	0.134454	Intergenic Region	0	TTAAGTAAAA--TAAGTAATTT	Not done
T06TC269		Chrom	337152	Reverse	BB0329	Forward	336629	338215	0.330391	oligopeptide ABC transporter, periplasmic binding protein	oppA-2	ATTGATATGT--TAGTACACCA	lp21
T07TC487		Chrom	337398	Forward	BB0329	Forward	336629	338215	0.484868	oligopeptide ABC transporter, periplasmic binding protein	oppA-2	AATGAAGAGC--TAGATGCAAT	cp9,lp5
T11TC145		Chrom	337853	Reverse	BB0329	Forward	336629	338215	0.772383	oligopeptide ABC transporter, periplasmic binding protein	oppA-2	ATGGACAACA--TACTTAAACA		cp9
T05TC429	see T08TC301	Chrom	337857	Reverse	BB0329	Forward	336629	338215	0.774905	oligopeptide ABC transporter, periplasmic binding protein	oppA-2	ACAACATACT--TAAACACTAA		lp5
T08TC301	Same site T05TC429; T08TC301, T08TC302	Chrom	337857	Forward	BB0329	Forward	336629	338215	0.774275	oligopeptide ABC transporter, periplasmic binding protein	oppA-2	ACAACATACT--TAAACACTAA		cp9
T08TC302	see T08TC301	Chrom	337857	Forward	BB0329	Forward	336629	338215	0.774275	oligopeptide ABC transporter, periplasmic binding protein	oppA-2	ACAACATACT--TAAACACTAA		lp5
T06TC569		Chrom	338108	Reverse	BB0329	Forward	336629	338215	0.933165	oligopeptide ABC transporter, periplasmic binding protein	oppA-2	AGCACCAATA--TACATATATG	Not done
T06TC265		Chrom	338112	Forward	BB0329	Forward	336629	338215	0.935057	oligopeptide ABC transporter, periplasmic binding protein	oppA-2	CCAATATACA--TATATGGGAA	lp5
T09TC114		Chrom	338756	Forward	BB0330	Forward	338358	339983	0.244923	oligopeptide ABC transporter, periplasmic binding protein	oppA-3	AAACAGGATC--TACAAATGTT	Complete
T11TC181		Chrom	340259	Forward	IR BB0331-BB0332	0	340218	340340	0.336066	Intergenic Region	0	AATTATCAAC--TATAGCTTGA	cp9,lp5	lp28-1
T04TC097		Chrom	344356	Forward	BB0336	Reverse	344947	344192	0.782781	P26		AGCTTAATAG--TATAAATTCC	Complete
T07TC143		Chrom	344803	Forward	BB0336	Reverse	344947	344192	0.190728	P26		GAATCAACCA--TAGGCTCAAG	cp32-7,lp28-1,lp5
T11TC297		Chrom	344924	Reverse	BB0336	Reverse	344947	344192	0.0291391	P26		CAAAAACCAA--TAAATACAAA	Not done
T04TC298		Chrom	344947	Forward	BB0336	Reverse	344947	344192	0	P26		CTTTCTTTCA--TAGATTATAC		lp5
T07TC179		Chrom	351478	Reverse	BB0344	Reverse	353440	351341	0.934254	DNA helicase	uvrD	TTATAAATTA--TATAATCTCC	lp21
T07TC421		Chrom	351622	Reverse	BB0344	Reverse	353440	351341	0.86565	DNA helicase	uvrD	AAAGTGCCCT--TATAAGAACC	lp5
T10TC209		Chrom	353286	Forward	BB0344	Reverse	353440	351341	0.0733683	DNA helicase	uvrD	TATATTCATA--TATTTGATTA	Complete
T09TC171		Chrom	355452	Forward	IR BB0346-BB0347	0	355299	355481	0.840659	Intergenic Region	0	ATTTAAAGCT--TAGATATAAA	lp5
T05TC626		Chrom	355858	Reverse	BB0347	Forward	355482	356909	0.264191	fibronectin/fibrinogen-binding protein, putative		TCGCCCAATA--TAATAGCTAC	lp38,cp9
T03TC026		Chrom	355865	Reverse	BB0347	Forward	355482	356909	0.269096	fibronectin/fibrinogen-binding protein, putative		ATATAATAGC--TACAAATTCA	lp5
T06TC534		Chrom	356010	Reverse	BB0347	Forward	355482	356909	0.370708	fibronectin/fibrinogen-binding protein, putative		AAAGGAAGAA--TATAATAATA	Not done
T05TC568		Chrom	356174	Forward	BB0347	Forward	355482	356909	0.484933	fibronectin/fibrinogen-binding protein, putative		AACAACAAAT--TAAACTGCTT	Complete
T08TC094		Chrom	356357	Reverse	BB0347	Forward	355482	356909	0.613875	fibronectin/fibrinogen-binding protein, putative		TTAAAGCATA--TAAAAAGGGC	cp32-7	lp28-3,lp38,lp5
T03TC130		Chrom	356639	Forward	BB0347	Forward	355482	356909	0.810792	fibronectin/fibrinogen-binding protein, putative		ATTGGCTTCA--TACAAGAGAT	lp5
T05TC017		Chrom	360982	Forward	BB0351	Reverse	361081	359513	0.0631378	conserved hypothetical protein		AAACTAACTT--TAACTTCTTT	lp38
T05TC030		Chrom	361141	Reverse	IR BB0351-BB0352	0	361082	361187	0.571429	Intergenic Region	0	GAAATTAATA--TAACTATAAA	Not done
T03TC295		Chrom	362288	Reverse	BB0352	Forward	361188	362321	0.971756	conserved hypothetical protein		GGTTTTTCTC--TAAAGCTAAT	lp21
T11TC272		Chrom	366717	Reverse	BB0358	Reverse	366960	366229	0.331053	RNA methyltransferase, RsmE family		AAACTAGAAA--TAAAAATACT	Complete
T06TC006		Chrom	366965	Forward	BB0359	Reverse	368391	366964	0.999299	carboxyl-terminal protease	ctp	CTTCACAATT--TAATTACCTA	lp28-1	lp5
T07TC279		Chrom	368614	Reverse	BB0360	Forward	368456	368881	0.374118	conserved hypothetical protein		TGTTAACATT--TATCTTATAC		lp17
T05TC417		Chrom	368657	Reverse	BB0360	Forward	368456	368881	0.475294	conserved hypothetical protein		TTTAACAACC--TATTACTTTA		lp28-1,lp5
T06TC013		Chrom	368736	Reverse	BB0360	Forward	368456	368881	0.661176	conserved hypothetical protein		ATATTAACAT--TATTATTATT	lp28-1
T04TC236		Chrom	368814	Forward	BB0360	Forward	368456	368881	0.842353	conserved hypothetical protein		GGAATTACAG--TAGTTTACCT	lp5	cp9
T05TC205		Chrom	368835	Reverse	BB0360	Forward	368456	368881	0.894118	conserved hypothetical protein		GTATTTAATG--TAACAATATT	lp28-2
T07TC375		Chrom	368850	Reverse	BB0360	Forward	368456	368881	0.929412	conserved hypothetical protein		ATATTAGTGC--TAATTAAAGC	Complete
T06TC468		Chrom	369013	Forward	BB0361	Forward	368885	370027	0.112084	minD-related ATP-binding protein	ylxH-2	TCGGAGCATC--TAATTTGCAC	Not done
T04TC204		Chrom	369225	Reverse	BB0361	Forward	368885	370027	0.298599	minD-related ATP-binding protein	ylxH-2	TATGATTACT--TAGTGATTGA	Complete
T05TC500		Chrom	369357	Forward	BB0361	Forward	368885	370027	0.41331	minD-related ATP-binding protein	ylxH-2	AAAAATATAA--TATTTAGATT	lp5
T04TC228	same site T04TC228, T10TC455	Chrom	369452	Forward	BB0361	Forward	368885	370027	0.496497	minD-related ATP-binding protein	ylxH-2	TCAAAGGGTT--TATATACCTA	lp5
T10TC455	same site T04TC228, T10TC455	Chrom	369452	Reverse	BB0361	Forward	368885	370027	0.497373	minD-related ATP-binding protein	ylxH-2	TCAAAGGGTT--TATATACCTA	lp5
T11TC284		Chrom	369460	Reverse	BB0361	Forward	368885	370027	0.504378	minD-related ATP-binding protein	ylxH-2	TTTATATACC--TAATTTGTTG	lp5
T09TC146		Chrom	369550	Forward	BB0361	Forward	368885	370027	0.582312	minD-related ATP-binding protein	ylxH-2	TCATGATATT--TAATATGCTC	cp9,lp5
T06TC033		Chrom	369704	Forward	BB0361	Forward	368885	370027	0.717163	minD-related ATP-binding protein	ylxH-2	CATCACTATA--TACAAACCTA	lp5
T05TC151		Chrom	371285	Forward	BB0363	Forward	371034	373046	0.124751	periplasmic protein		AAATCCATTC--TATCATAATT	lp5
T09TC153	same site T09TC153, T10TC492	Chrom	371365	Forward	BB0363	Forward	371034	373046	0.164513	periplasmic protein		ATAAGCGAAT--TAGAATATAA	lp38,lp5
T10TC492	same site T09TC153, T10TC492	Chrom	371365	Forward	BB0363	Forward	371034	373046	0.164513	periplasmic protein		ATAAGCGAAT--TAGAATATAA	Complete
T07TC057		Chrom	371558	Reverse	BB0363	Forward	371034	373046	0.260934	periplasmic protein		CCTCTGGAAA--TATAATCAAA	cp9,lp5
T05TC053	T08TC453, T08TC590; same site:T05TC053, T06TC521	Chrom	371578	Reverse	BB0363	Forward	371034	373046	0.270875	periplasmic protein		GTAACCGACA--TAGATATCAG	cp9,lp28-2	lp5
T06TC521	T08TC453, T08TC590; same site:T05TC053, T06TC521	Chrom	371578	Forward	BB0363	Forward	371034	373046	0.270378	periplasmic protein		GTAACCGACA--TAGATATCAG	Not done
T08TC453	T08TC453, T08TC590; same site:T05TC053, T06TC521	Chrom	371578	Forward	BB0363	Forward	371034	373046	0.270378	periplasmic protein		GTAACCGACA--TAGATATCAG	lp5
T08TC590	T08TC453, T08TC590; same site:T05TC053, T06TC521	Chrom	371578	Reverse	BB0363	Forward	371034	373046	0.270875	periplasmic protein		GTAACCGACA--TAGATATCAG	lp5
T04TC278		Chrom	371654	Forward	BB0363	Forward	371034	373046	0.308151	periplasmic protein		AATTTAAAAA--TATATTAATA	Complete
T08TC613		Chrom	371656	Reverse	BB0363	Forward	371034	373046	0.309642	periplasmic protein		TTTAAAAATA--TATTAATAAC	lp5
T11TC255		Chrom	371798	Reverse	BB0363	Forward	371034	373046	0.380219	periplasmic protein		TAGAAAACTA--TAAATATCTA	Complete
T03TC202		Chrom	371863	Forward	BB0363	Forward	371034	373046	0.412028	periplasmic protein		GAAAAATTAC--TAGTAAACCA	cp32-6,lp28-1,lp5
T05TC411		Chrom	371879	Reverse	BB0363	Forward	371034	373046	0.420477	periplasmic protein		ACCATATGGA--TATTTACAAA	lp28-1,lp5
T10TC353		Chrom	371901	Reverse	BB0363	Forward	371034	373046	0.431412	periplasmic protein		AAAAAGCATA--TATTTACTTA		lp5
T06TC460		Chrom	372010	Reverse	BB0363	Forward	371034	373046	0.485586	periplasmic protein		AATGTCATTA--TACTCTGAAT	Not done
T08TC155		Chrom	372049	Forward	BB0363	Forward	371034	373046	0.504473	periplasmic protein		CACAACAATT--TAATAGTAAT	Complete
T10P01C06	T10P01C06, T10P01F02	Chrom	372272	Reverse	BB0363	Forward	371034	373046	0.615805	periplasmic protein		CTAATCCCAC--TATATACAAA	Not done
T10P01F02	T10P01C06, T10P01F02	Chrom	372272	Reverse	BB0363	Forward	371034	373046	0.615805	periplasmic protein		CTAATCCCAC--TATATACAAA	lp5
T08TC456		Chrom	372549	Forward	BB0363	Forward	371034	373046	0.752982	periplasmic protein		TTTAAGAGAA--TACAAAAGCT	lp5
T07TC273		Chrom	372813	Reverse	BB0363	Forward	371034	373046	0.884692	periplasmic protein		ATCACTCTCA--TATATTAAAA	lp5
T10TC349		Chrom	372832	Forward	BB0363	Forward	371034	373046	0.893638	periplasmic protein		ACACTACCAA--TAGACTTACT	lp5
T04TC398		Chrom	372960	Reverse	BB0363	Forward	371034	373046	0.957753	periplasmic protein		CGAATTTGTG--TATAATGAGG	cp32-6
T10TC324		Chrom	373005	Forward	BB0363	Forward	371034	373046	0.979622	periplasmic protein		AGAAATAGAC--TATGGGCAAG	lp5
T11TC154		Chrom	373078	Forward	IR BB0363-BB0364	0	373047	373139	0.336957	Intergenic Region	0	AAAATATACT--TATGCCTAAA		cp9
T06TC162		Chrom	373581	Reverse	BB0365	Reverse	374151	373567	0.974315	outer surface 22 kda lipoprotein (antigen IpLA7)		TTCGTTAACA--TAGGTGAAAT	cp9,lp28-1
T08TC050		Chrom	373650	Reverse	BB0365	Reverse	374151	373567	0.856164	outer surface 22 kda lipoprotein (antigen IpLA7)		GCATCTGAAT--TATTCTCATC	Complete
T10TC357		Chrom	374013	Forward	BB0365	Reverse	374151	373567	0.236301	outer surface 22 kda lipoprotein (antigen IpLA7)		TCATCTATTT--TAGAATCATC		lp5
T09TC042		Chrom	375833	Reverse	BB0367	Forward	375661	375939	0.622302	putative phosphotransferase enzyme IIb component		GACAACATAA--TAGGAACTAT	lp5
T05TC542		Chrom	376028	Reverse	BB0368	Reverse	377052	375961	0.937672	glycerol-3-phosphate dehydrogenase, NAD(P)+	gpsA	CAAAATTTTA--TATATAACGC	lp5
T07TC456		Chrom	376069	Reverse	BB0368	Reverse	377052	375961	0.900092	glycerol-3-phosphate dehydrogenase, NAD(P)+	gpsA	GATCACGATT--TAATTGTTTA	lp5
T05TC189		Chrom	376509	Reverse	BB0368	Reverse	377052	375961	0.496792	glycerol-3-phosphate dehydrogenase, NAD(P)+	gpsA	CTAAATAAAT--TAATAAACAA	Complete
T08P01E10		Chrom	385422	Forward	BB0374	Forward	384287	385426	0.996488	HD domain protein		ATAGATATTA--TATAAGACAC	lp21, lp5
T11TC310		Chrom	387434	Reverse	BB0377	Forward	387334	387807	0.213983	S-ribosylhomocysteinase	luxS	TTTACTACAA--TAGACATTAG	Not done		Revised 5' end to match GenBank NC_001318.1 (110513)
T06TC451		Chrom	387492	Reverse	BB0377	Forward	387334	387807	0.336864	S-ribosylhomocysteinase	luxS	CAGCAATACA--TACAATAGAG	Not done		Revised 5' end to match GenBank NC_001318.1 (110513)
T05P01F05		Chrom	387738	Forward	BB0377	Forward	387334	387807	0.858051	S-ribosylhomocysteinase	luxS	TTGATATGGC--TAAATATGAA	Not done		Revised 5' end to match GenBank NC_001318.1 (110513)
T04TC081		Chrom	387742	Forward	BB0377	Forward	387334	387807	0.866525	S-ribosylhomocysteinase	luxS	TATGGCTAAA--TATGAATCTT	Complete		Revised 5' end to match GenBank NC_001318.1 (110513)
T08P01F05		Chrom	388122	Forward	BB0378	Reverse	388480	387818	0.540785	conserved hypothetical protein		TAAAAAGAAA--TAATTACCAT	Not done
T03TC329		Chrom	388214	Reverse	BB0378	Reverse	388480	387818	0.400302	conserved hypothetical protein		CCAACATAAA--TATAATCTCA	lp5
T06TC469		Chrom	388230	Reverse	BB0378	Reverse	388480	387818	0.376133	conserved hypothetical protein		CTCATTGGTA--TAAGGAGTAT	Not done
T11TC407		Chrom	388329	Reverse	BB0378	Reverse	388480	387818	0.226586	conserved hypothetical protein		GAAAAATTGA--TACTTAAGTC	Not done
T05TC195		Chrom	391871	Forward	IR BB0381-BB0382	0	391820	391931	0.459459	Intergenic Region	0	TATAACACAA--TAAATATAAC	cp9,lp21
T04TC314		Chrom	394233	Reverse	BB0384	Reverse	395166	394105	0.878417	basic membrane protein C	bmpC	TCGGGATCCT--TAACAATTTC	lp5
T09TC084		Chrom	394382	Forward	BB0384	Reverse	395166	394105	0.738926	basic membrane protein C	bmpC	AGGCGCAATA--TATGATTGAT	cp9,lp28-1,lp5
T10TC149		Chrom	394786	Reverse	BB0384	Reverse	395166	394105	0.35721	basic membrane protein C	bmpC	CAAAAGCATC--TATAATACCA		lp5
T09TC375		Chrom	394998	Reverse	BB0384	Reverse	395166	394105	0.157399	basic membrane protein C	bmpC	AAATTATCCC--TAAGTTTTAC	Complete
T03TC215		Chrom	410661	Forward	IR BB0398-BB0399	0	410448	410786	0.630178	Intergenic Region	0	AACTGACAAT--TATGACCACA	Complete
T07TC244		Chrom	411697	Forward	BB0400	Reverse	413006	411456	0.844516	conserved hypothetical protein		ATAATAATCG--TAATATTGGC		lp5
T08TC127		Chrom	412038	Reverse	BB0400	Reverse	413006	411456	0.623871	conserved hypothetical protein		GGTTAGCAAC--TACATTATTT		lp5
T05TC549		Chrom	412682	Reverse	BB0400	Reverse	413006	411456	0.208387	conserved hypothetical protein		GCGGCAAATC--TAAATAAAAT	cp9,lp28-1,lp5
T05TC019		Chrom	416912	Reverse	BB0404	Forward	416689	417105	0.538462	conserved hypothetical protein		AGTAGTATAA--TAATAGCTGT	Complete
T03TC192		Chrom	417533	Forward	BB0405	Forward	417102	417713	0.705401	conserved hypothetical protein		CTCTTCAAAA--TAGAATAGGG	lp28-2,lp5
T05TC147		Chrom	417565	Forward	BB0405	Forward	417102	417713	0.757774	conserved hypothetical protein		TTGCCTTTGG--TAATAGAGTA	lp21
T06TC526		Chrom	417668	Forward	BB0405	Forward	417102	417713	0.92635	conserved hypothetical protein		TTGAAGGAGC--TAGATTTAAT	Not done
T06TC236		Chrom	417880	Reverse	BB0406	Forward	417724	418335	0.256956	conserved hypothetical protein		AAAGAAAAAT--TATGACTTAT	cp9
T06TC360		Chrom	418057	Reverse	BB0406	Forward	417724	418335	0.546645	conserved hypothetical protein		AATTGGACAA--TATATGAAAA	lp5
T07TC463		Chrom	420447	Reverse	BB0408	Reverse	421380	419503	0.496537	PTS system, fructose-specific IIABC component	fruA-1	AAAGCAATGC--TAAGAGCAAT	Complete
T11TC520		Chrom	420789	Forward	BB0408	Reverse	421380	419503	0.314864	PTS system, fructose-specific IIABC component	fruA-1	GTTTCTACTC--TAATGCTATA	Not done
T04TC410		Chrom	420810	Forward	BB0408	Reverse	421380	419503	0.303676	PTS system, fructose-specific IIABC component	fruA-1	CCCTGCTTTT--TAGCTTCATT	lp5	lp38
T09TC273		Chrom	421017	Reverse	BB0408	Reverse	421380	419503	0.192861	PTS system, fructose-specific IIABC component	fruA-1	TCAAATAGTT--TAGCTATAAA	cp9,lp5
T07TC473		Chrom	421164	Forward	BB0408	Reverse	421380	419503	0.115077	PTS system, fructose-specific IIABC component	fruA-1	AAACTAGTCT--TAACAACATC	lp5
T08P01G11		Chrom	421348	Forward	BB0408	Reverse	421380	419503	0.0170485	PTS system, fructose-specific IIABC component	fruA-1	GCAAAACAAA--TACAAGATCT	lp21,lp5
T07TC503		Chrom	421407	Reverse	IR BB0408-BB0409	0	421381	421553	0.156977	Intergenic Region	0	TAATTAAACA--TATTGTATAA	Complete
T10TC490		Chrom	422481	Reverse	BB0411	Forward	422471	423058	0.0187394	DNA/RNA non-specific endonuclease	nucA	ATGGTAGAAC--TAGCATTAAC	Complete
T09TC436		Chrom	422727	Reverse	BB0411	Forward	422471	423058	0.437819	DNA/RNA non-specific endonuclease	nucA	CTTGAAAAAT--TAGTAAGAGA	Complete
T05TC193		Chrom	422756	Reverse	BB0411	Forward	422471	423058	0.487223	DNA/RNA non-specific endonuclease	nucA	CTCAAAAGGA--TATATATATA	cp9,lp28-1
T04TC174	same site T04TC174, T08TC472	Chrom	422758	Reverse	BB0411	Forward	422471	423058	0.49063	DNA/RNA non-specific endonuclease	nucA	CAAAAGGATA--TATATATATT	cp9,lp5
T08TC472	same site T04TC174, T08TC472	Chrom	422758	Reverse	BB0411	Forward	422471	423058	0.49063	DNA/RNA non-specific endonuclease	nucA	CAAAAGGATA--TATATATATT		lp5
T05TC345		Chrom	422759	Forward	BB0411	Forward	422471	423058	0.49063	DNA/RNA non-specific endonuclease	nucA	AAAAGGATAT--ATATATATTA	lp5		anomolous transposition event
T08P01E06	T08P01E06, T08P01F11	Chrom	422847	Reverse	BB0411	Forward	422471	423058	0.642249	DNA/RNA non-specific endonuclease	nucA	TTTTATAAAA--TAGTACTGGC	Not done
T08P01F11	T08P01E06, T08P01F11	Chrom	422847	Reverse	BB0411	Forward	422471	423058	0.642249	DNA/RNA non-specific endonuclease	nucA	TTTTATAAAA--TAGTACTGGC	Not done
T04TC186		Chrom	422883	Forward	BB0411	Forward	422471	423058	0.701874	DNA/RNA non-specific endonuclease	nucA	TATTATGACA--TAATCTCTTT	lp5
T09TC334		Chrom	422893	Forward	BB0411	Forward	422471	423058	0.71891	DNA/RNA non-specific endonuclease	nucA	TAATCTCTTT--TATTATCCCA	lp5
T05TC547		Chrom	423471	Reverse	BB0412	Forward	423055	423834	0.535302	membrane protein, putative		TCAGTTTATA--TATATGCGAT	lp28-1
T06TC510		Chrom	423473	Reverse	BB0412	Forward	423055	423834	0.537869	membrane protein, putative		AGTTTATATA--TATGCGATTT	Not done
T03TC010	T03TC010, T03TC084	Chrom	423540	Reverse	BB0412	Forward	423055	423834	0.623877	membrane protein, putative		CCTGCATATA--TAGTTACACA	Complete
T03TC084	see T03TC010	Chrom	423540	Forward	BB0412	Forward	423055	423834	0.622593	membrane protein, putative		CCTGCATATA--TAGTTACACA		lp5
T11TC256		Chrom	423544	Forward	BB0412	Forward	423055	423834	0.627728	membrane protein, putative		CATATATAGT--TACACAATGC	lp5
T07TC257		Chrom	423555	Reverse	BB0412	Forward	423055	423834	0.643132	membrane protein, putative		ACACAATGCC--TATTAATTCG		lp5
T05TC588	same site:T07TC500, T05TC588	Chrom	423620	Forward	BB0412	Forward	423055	423834	0.725289	membrane protein, putative		AAATTTTACA--TAGATGCATT	lp5
T07TC500	same site:T07TC500, T05TC588	Chrom	423620	Reverse	BB0412	Forward	423055	423834	0.726573	membrane protein, putative		AAATTTTACA--TAGATGCATT	lp5
T08TC344		Chrom	424152	Reverse	BB0413	Reverse	424445	423822	0.4687	conserved hypothetical integral membrane protein		ATGATATCAA--TATACCTAAA	cp9,lp28-2
T06TC295		Chrom	424556	Forward	IR BB0413-BB0414	0	424446	424693	0.445344	Intergenic Region	0	AAAACCTTTT--TATAAACCTA	Complete
T08TC168		Chrom	425011	Forward	BB0414	Forward	424694	425551	0.369895	chemotaxis protein methyltransferase	cheR-2	AAAATAGGAT--TATCATCTGG	cp9
T11TC527		Chrom	425058	Forward	BB0414	Forward	424694	425551	0.424737	chemotaxis protein methyltransferase	cheR-2	CCTTATTCAT--TAGCATTTGT	lp5
T11TC418		Chrom	425094	Forward	BB0414	Forward	424694	425551	0.470245	chemotaxis protein methyltransferase	cheR-2	CCAAAAGAAA--TA(G)ATTTTGTT	Not done		possible genome sequence error (G at 425096)
T08TC139		Chrom	425339	Reverse	BB0414	Forward	424694	425551	0.753792	chemotaxis protein methyltransferase	cheR-2	TGTTTTAATA--TACTTTGATG		lp5
T05TC332		Chrom	425807	Reverse	BB0415	Forward	425584	426711	0.198758	protein-glutamate methylesterase	cheB-1	AAAAACAGTT--TAAACAAAAC		lp5
T04TC055		Chrom	425819	Reverse	BB0415	Forward	425584	426711	0.209406	protein-glutamate methylesterase	cheB-1	AACAAAACAA--TACCAATTGT	lp5
T05TC550		Chrom	425889	Reverse	BB0415	Forward	425584	426711	0.271517	protein-glutamate methylesterase	cheB-1	CCGATGATCT--TATATTAGTA	Complete
T08TC619		Chrom	426246	Reverse	BB0415	Forward	425584	426711	0.588287	protein-glutamate methylesterase	cheB-1	TTGTTCAACA--TATGCCTAAA	Complete
T06TC106		Chrom	426261	Forward	BB0415	Forward	425584	426711	0.60071	protein-glutamate methylesterase	cheB-1	CTAAAGGATT--TACAGAAGAA	lp5
T08TC614		Chrom	426352	Forward	BB0415	Forward	425584	426711	0.681455	protein-glutamate methylesterase	cheB-1	AGGATATGCA--TACATTAGCT		lp5
T04TC378		Chrom	426474	Reverse	BB0415	Forward	425584	426711	0.790594	protein-glutamate methylesterase	cheB-1	TATTTCAATC--TATTGCAGAG	lp21
T10TC237		Chrom	426645	Forward	BB0415	Forward	425584	426711	0.941437	protein-glutamate methylesterase	cheB-1	AGGAAAACAA--TATAGACTAT	Complete
T06TC001		Chrom	429055	Forward	BB0418	Forward	428646	429674	0.39786	conserved hypothetical protein		TTTTTAAATT--TATATGCATC	Complete
T11TC190		Chrom	429494	Reverse	BB0418	Forward	428646	429674	0.825875	conserved hypothetical protein		ACAACATTTC--TATTGTTGCT	lp5	lp28-1
T09TC402		Chrom	429701	Reverse	BB0419	Reverse	430616	429693	0.990249	response regulatory protein-1	rrp-1	ATTTAATATC--TAAACTGATT	cp32-6	lp5
T11TC306		Chrom	430361	Reverse	BB0419	Reverse	430616	429693	0.27519	response regulatory protein-1	rrp-1	GGAATCTCTT--TAGTATCGGG	Not done
T10TC452		Chrom	430422	Forward	BB0419	Reverse	430616	429693	0.210184	response regulatory protein-1	rrp-1	CTGGAAGACC--TATGTCAAGA	lp5
T05TC185		Chrom	430520	Forward	BB0419	Reverse	430616	429693	0.104009	response regulatory protein-1	rrp-1	CCTTGCAATA--TATTTACCAA	Complete
T08TC534		Chrom	430524	Reverse	BB0419	Reverse	430616	429693	0.0985915	response regulatory protein	rrp-1	GCAATATATT--TACCAATAAA	lp5
T09TC391		Chrom	430623	Reverse	BB0420	Reverse	435103	430619	0.998885	sensory transduction histidine kinase/response regulator-1	hk1	CCACTGCTAA--TATCTCTTAT	cp32-6,lp21	lp5
T10TC488		Chrom	430630	Reverse	BB0420	Reverse	435103	430619	0.997324	sensory transduction histidine kinase/response regulator-1	hk1	TAATATCTCT--TATTATTAAG	Complete
T10TC395		Chrom	430916	Forward	BB0420	Reverse	435103	430619	0.933764	sensory transduction histidine kinase/response regulator-1	hk1	TGTCGCTTAT--TAGTTGAAAT		lp5
T05TC427		Chrom	431110	Reverse	BB0420	Reverse	435103	430619	0.890277	sensory transduction histidine kinase/response regulator-1	hk1	AAATCAATAA--TATTAATAGA	lp21
T07TC469	same site: T07TC469, T08TC109, T11TC189	Chrom	431159	Forward	BB0420	Reverse	435103	430619	0.879572	sensory transduction histidine kinase/response regulator-1	hk1	CAGAATATGA--TACATATGAA	lp5
T08TC109	same site: T07TC469, T08TC109, T11TC189	Chrom	431159	Reverse	BB0420	Reverse	435103	430619	0.879349	sensory transduction histidine kinase/response regulator-1	hk1	CAGAATATGA--TACATATGAA	lp5
T11TC189	same site: T07TC469, T08TC109, T11TC189	Chrom	431159	Forward	BB0420	Reverse	435103	430619	0.879572	sensory transduction histidine kinase/response regulator-1	hk1	CAGAATATGA--TACATATGAA	cp32-3,lp5	lp28-1
T05TC410		Chrom	431165	Reverse	BB0420	Reverse	435103	430619	0.878011	sensory transduction histidine kinase/response regulator-1	hk1	ATGATACATA--TGAAAGATTT	cp9,lp28-1,lp5		anomolous transposition event
T10TC502		Chrom	431174	Forward	BB0420	Reverse	435103	430619	0.876227	sensory transduction histidine kinase/response regulator-1	hk1	ATGAAAGATT--TAATTCTTTT		lp5
T06TC381		Chrom	431279	Forward	BB0420	Reverse	435103	430619	0.85281	sensory transduction histidine kinase/response regulator-1	hk1	AGTATTTTTT--TAATATAGTT	Not done
T10TC476		Chrom	431306	Forward	BB0420	Reverse	435103	430619	0.846789	sensory transduction histidine kinase/response regulator-1	hk1	AACTTATGTG--TATTGGTTTT	lp5
T07TC023		Chrom	431572	Reverse	BB0420	Reverse	435103	430619	0.787244	sensory transduction histidine kinase/response regulator-1	hk1	TTAATGCCTA--TAACAACAAG	lp28-1
T08TC530		Chrom	431614	Reverse	BB0420	Reverse	435103	430619	0.777877	sensory transduction histidine kinase/response regulator-1	hk1	TTTACCTGAT--TATCTTCAGC	lp5
T11TC188		Chrom	431624	Forward	BB0420	Reverse	435103	430619	0.77587	sensory transduction histidine kinase/response regulator-1	hk1	TATCTTCAGC--TATTAAAACA	lp5
T05TC170		Chrom	431729	Forward	BB0420	Reverse	435103	430619	0.752453	sensory transduction histidine kinase/response regulator-1	hk1	GAATAGAGCA--TATACCAAGC	cp9
T05TC270		Chrom	431760	Reverse	BB0420	Reverse	435103	430619	0.745317	sensory transduction histidine kinase/response regulator-1	hk1	CTTTTTAACA--TAACCATATT	cp32-7,lp5
T09TC395		Chrom	431896	Reverse	BB0420	Reverse	435103	430619	0.714987	sensory transduction histidine kinase/response regulator-1	hk1	TTTACATTTA--TATAAACAAA	cp9	lp5
T11TC218	T11TC218, T11TC226	Chrom	431971	Forward	BB0420	Reverse	435103	430619	0.698483	sensory transduction histidine kinase/response regulator-1	hk1	TAGCGCACAT--TAGAAGAGCA	lp5
T11TC226	T11TC218, T11TC226	Chrom	431971	Forward	BB0420	Reverse	435103	430619	0.698483	sensory transduction histidine kinase/response regulator-1	hk1	TAGCGCACAT--TAGAAGAGCA	lp21
T10TC099		Chrom	432163	Reverse	BB0420	Reverse	435103	430619	0.655442	sensory transduction histidine kinase/response regulator-1	hk1	CCCACCTTGC--TATCAACAGC	lp5
T07TC089		Chrom	432379	Reverse	BB0420	Reverse	435103	430619	0.60727	sensory transduction histidine kinase/response regulator-1	hk1	GTTCTTGTTC--TACATACTTC	lp21,lp5
T04TC194		Chrom	432427	Forward	BB0420	Reverse	435103	430619	0.596789	sensory transduction histidine kinase/response regulator-1	hk1	TCTGTAAACT--TAAAAGCATT	cp9,lp28-2
T07TC521		Chrom	432487	Forward	BB0420	Reverse	435103	430619	0.583408	sensory transduction histidine kinase/response regulator-1	hk1	TCACCCTTTA--TATAATTATT		lp5
T07TC099		Chrom	432489	Forward	BB0420	Reverse	435103	430619	0.582962	sensory transduction histidine kinase/response regulator-1	hk1	ACCCTTTATA--TAATTATTAA	Complete
T09P01D01	T09P01D01, T09P01E01, T09P01E09, T09P02G02	Chrom	432587	Forward	BB0420	Reverse	435103	430619	0.561106	sensory transduction histidine kinase/response regulator-1	hk1	TTTCACTCTC--TAAATCAATC	Not done
T09P01E01	see T09P01D01	Chrom	432587	Forward	BB0420	Reverse	435103	430619	0.561106	sensory transduction histidine kinase/response regulator-1	hk1	TTTCACTCTC--TAAATCAATC	Complete
T09P01E09	see T09P01D01	Chrom	432587	Forward	BB0420	Reverse	435103	430619	0.561106	sensory transduction histidine kinase/response regulator-1	hk1	TTTCACTCTC--TAAATCAATC	Not done
T09P02G02	see T09P01D01	Chrom	432587	Forward	BB0420	Reverse	435103	430619	0.561106	sensory transduction histidine kinase/response regulator-1	hk1	TTTCACTCTC--TAAATCAATC	Not done
T10TC433		Chrom	432659	Forward	BB0420	Reverse	435103	430619	0.545049	sensory transduction histidine kinase/response regulator-1	hk1	TATCATCAAT--TAAAGAAAGC	cp32-6,lp5
T07TC390		Chrom	432727	Reverse	BB0420	Reverse	435103	430619	0.529661	sensory transduction histidine kinase/response regulator-1		TCTGTAAGAA--TAGTTGTATC	Complete
T10TC436		Chrom	432758	Reverse	BB0420	Reverse	435103	430619	0.522748	sensory transduction histidine kinase/response regulator-1	hk1	TAGCCGCCAT--TATTCCGTTA	lp21
T07TC348		Chrom	432947	Reverse	BB0420	Reverse	435103	430619	0.480598	sensory transduction histidine kinase/response regulator-1	hk1	TAATGAATGT--TATCACTAAA	cp32-6
T07TC230		Chrom	432996	Forward	BB0420	Reverse	435103	430619	0.469893	sensory transduction histidine kinase/response regulator-1	hk1	GGATTTATAA--TAAATATCAA	Complete
T08TC601		Chrom	433305	Reverse	BB0420	Reverse	435103	430619	0.400758	sensory transduction histidine kinase/response regulator-1	hk1	ATTTTTACTA--TATAAAAAAT	Complete
T11P01E04	T11P02D01, T11P01E04, T11P01E07, T11P01E09	Chrom	433342	Reverse	BB0420	Reverse	435103	430619	0.60727	sensory transduction histidine kinase/response regulator-1	hk1	TCTAAAGATC--TAGATGGAAG	Not done
T11P01E07	see T11P01E04	Chrom	433342	Reverse	BB0420	Reverse	435103	430619	0.392507	sensory transduction histidine kinase/response regulator-1	hk1	TCTAAAGATC--TAGATGGAAG	cp9,lp5
T11P01E09	see T11P01E04	Chrom	433342	Reverse	BB0420	Reverse	435103	430619	0.60727	sensory transduction histidine kinase/response regulator-1	hk1	TCTAAAGATC--TAGATGGAAG	Not done
T11P02D01	see T11P01E04	Chrom	433342	Reverse	BB0420	Reverse	435103	430619	0.60727	sensory transduction histidine kinase/response regulator-1	hk1	TCTAAAGATC--TAGATGGAAG	Not done
T10TC477		Chrom	433403	Reverse	BB0420	Reverse	435103	430619	0.378903	sensory transduction histidine kinase/response regulator-1	hk1	AATTTAATTT--TATGTTGAAA	lp5
T05TC111		Chrom	433441	Reverse	BB0420	Reverse	435103	430619	0.370428	sensory transduction histidine kinase/response regulator-1	hk1	TCGGTTGCAT--TAGTATTTAG	lp38,lp5
T05TC541	same site:T05TC541, T09TC425	Chrom	433448	Reverse	BB0420	Reverse	435103	430619	0.368867	sensory transduction histidine kinase/response regulator-1	hk1	CATTAGTATT--TAGCATATCG	cp9
T09TC425	same site:T05TC541, T09TC425	Chrom	433448	Forward	BB0420	Reverse	435103	430619	0.36909	sensory transduction histidine kinase/response regulator-1	hk1	CATTAGTATT--TAGCATATCG		lp5
T05TC489	same site:T05TC489, T09TC413	Chrom	433490	Forward	BB0420	Reverse	435103	430619	0.359723	sensory transduction histidine kinase/response regulator-1	hk1	TTTTAAGATC--TAAACTGCTG	Complete
T09TC413	same site:T05TC489, T09TC413	Chrom	433490	Reverse	BB0420	Reverse	435103	430619	0.3595	sensory transduction histidine kinase/response regulator-1	hk1	TTTTAAGATC--TAAACTGCTG	cp32-6	lp5
T08TC543		Chrom	433786	Reverse	BB0420	Reverse	435103	430619	0.293488	sensory transduction histidine kinase/response regulator-1	hk1	TCATCAAATA--TAGAATTGAG	cp9
T10TC449		Chrom	433990	Reverse	BB0420	Reverse	435103	430619	0.247993	sensory transduction histidine kinase/response regulator-1	hk1	ACAATATCTT--TATTCTTATT	lp5
T08TC562		Chrom	434097	Forward	BB0420	Reverse	435103	430619	0.224353	sensory transduction histidine kinase/response regulator-1	hk1	ATTAAGAGGA--TATATTGGCT	Complete
T07TC216		Chrom	434107	Forward	BB0420	Reverse	435103	430619	0.222123	sensory transduction histidine kinase/response regulator-1	hk1	TATATTGGCT--TACTTACTAC	lp5
T07TC234		Chrom	434197	Forward	BB0420	Reverse	435103	430619	0.202052	sensory transduction histidine kinase/response regulator-1	hk1	AATGATTTCT--TAATATCCTC	lp5
T05TC097		Chrom	434233	Forward	BB0420	Reverse	435103	430619	0.194023	sensory transduction histidine kinase/response regulator-1	hk1	AAAATAGGTT--TAAAGATATG	cp32-6,lp5
T05TC108		Chrom	434322	Reverse	BB0420	Reverse	435103	430619	0.173952	sensory transduction histidine kinase/response regulator-1	hk1	TAAAGGAGGA--TAATCATTAT	lp5
T07TC191	same site: T07TC191, T08TC529, T09TC485	Chrom	434329	Reverse	BB0420	Reverse	435103	430619	0.172391	sensory transduction histidine kinase/response regulator-1	hk1	GGATAATCAT--TATATAAACC	lp5
T08TC529	same site: T07TC191, T08TC529, T09TC485	Chrom	434329	Reverse	BB0420	Reverse	435103	430619	0.172391	sensory transduction histidine kinase/response regulator-1	hk1	GGATAATCAT--TATATAAACC	lp5
T09TC485	same site: T07TC191, T08TC529, T09TC485	Chrom	434329	Forward	BB0420	Reverse	435103	430619	0.172614	sensory transduction histidine kinase/response regulator-1	hk1	GGATAATCAT--TATATAAACC	lp5
T09TC024		Chrom	434331	Forward	BB0420	Reverse	435103	430619	0.172168	sensory transduction histidine kinase/response regulator-1	hk1	ATAATCATTA--TATAAACCAA	lp38,lp5
T10TC335		Chrom	434368	Reverse	BB0420	Reverse	435103	430619	0.163693	sensory transduction histidine kinase/response regulator-1	hk1	TTAGCATTGC--TATCTAAAAA	cp32-6
T08TC357		Chrom	434441	Forward	BB0420	Reverse	435103	430619	0.147636	sensory transduction histidine kinase/response regulator-1	hk1	TCAAATTCTT--TACTATCTCA	lp5
T09TC030		Chrom	434464	Forward	BB0420	Reverse	435103	430619	0.142507	sensory transduction histidine kinase/response regulator-1	hk1	GCATTTCTAC--TAATAGCCAC	Complete
T10TC397		Chrom	434488	Forward	BB0420	Reverse	435103	430619	0.137154	sensory transduction histidine kinase/response regulator-1	hk1	TTTTTGATAC--TATAAAAAAC	Complete
T05TC554	same site: T05TC554, T06TC464	Chrom	434573	Reverse	BB0420	Reverse	435103	430619	0.117975	sensory transduction histidine kinase/response regulator-1	hk1	AATCACCATA--TATATAATCA	lp5
T06TC464	same site: T05TC554, T06TC464	Chrom	434573	Forward	BB0420	Reverse	435103	430619	0.118198	sensory transduction histidine kinase/response regulator-1	hk1	AATCACCATA--TATATAATCA	Not done
T04P01A08		Chrom	434674	Reverse	BB0420	Reverse	435103	430619	0.0956735	sensory transduction histidine kinase/response regulator-1	hk1	ATATCTTCA--TATATTGTAT	lp28-1,lp5
T09TC507	T09TC507, T09TC509	Chrom	434965	Forward	BB0420	Reverse	435103	430619	0.0307761	sensory transduction histidine kinase/response regulator-1	hk1	TATTCTCCTT--TATTATTCTT		lp5
T09TC509	T09TC507, T09TC509	Chrom	434965	Forward	BB0420	Reverse	435103	430619	0.0307761	sensory transduction histidine kinase/response regulator-1	hk1	TATTCTCCTT--TATTATTCTT	lp5	cp32-9,cp9,lp28-1,lp38
T09TC071		Chrom	435278	Reverse	GBBBb5SF	0	435312	435201	0.297297	5S rRNA	5S rrlA	TTCGGAATGA--TAACAGGTGT	cp9
T09TC112		Chrom	435834	Reverse	GBBBb23SB	0	438263	435345	0.832077	23S rRNA	23S rrlA	GCCAGATCAC--TAAGACCTAC	lp5	cp9
T03TC029		Chrom	435871	Forward	GBBBb23SB	0	438263	435345	0.81974	23S rRNA	23S rrlA	TTGTCAGTCT--TACAGTTAAG	Complete
T06TC455	T06TC455, T06TC553	Chrom	436106	Reverse	GBBBb23SB	0	438263	435345	0.738862	23S rRNA	23S rrlA	ATCCTACACA--TATTTAATCA	Not done
T06TC553	T06TC455, T06TC553	Chrom	436106	Reverse	GBBBb23SB	0	438263	435345	0.738862	23S rRNA	23S rrlA	ATCCTACACA--TATTTAATCA	Not done
T10TC052		Chrom	436474	Forward	GBBBb23SB	0	438263	435345	0.613091	23S rRNA	23S rrlA	CCTAATTGCT--TAGGTCGTAC	Complete
T08TC031		Chrom	436594	Forward	GBBBb23SB	0	438263	435345	0.571967	23S rRNA	23S rrlA	CGGTCCCTTA--TAGCCTAACC	Complete
T08TC337		Chrom	436635	Forward	GBBBb23SB	0	438263	435345	0.557916	23S rRNA	23S rrlA	CTTGACTACC--TACATTTCAT	lp5
T10TC068		Chrom	436796	Forward	GBBBb23SB	0	438263	435345	0.502742	23S rRNA	23S rrlA	GGTACGGGAA--TATTAACCCG		lp5
T05TC004		Chrom	438251	Forward	GBBBb23SB	0	438263	435345	0.00411241	23S rRNA	23S rrlA	CATAGACTCT--TATTACTTTG	lp5
T10TC333		Chrom	438315	Forward	GBBBb23SB	0	438263	435345	0.0178204	23S rRNA	23S rrlA	CAACATAAAA--TAATATATAT	lp5
T09TC445		Chrom	438335	Reverse	GBBBb23SB	0	438263	435345	0.0250171	23S rRNA	23S rrlA	CTTTGTTTAA--TACATGTCAA	Complete
T05TC361		Chrom	438347	Forward	GBBBb23SB	0	438263	435345	0.0287868	23S rRNA	23S rrlA	CATGTCAATA--TATATTTTAT	cp32-6	lp5
T11TC228		Chrom	439079	Forward	GBBBb23SD	0	441508	438590	0.832419	23S rRNA	23S rrlB	GCCAGATCAC--TAAGACCTAC	Complete
T03TC145		Chrom	439086	Forward	GBBBb23SD	0	441508	438590	0.830021	23S rRNA	23S rrlB	CACTAAGACC--TACTTTCGTA	lp5		may be either locus
T05TC449	T05TC449, T05TC479	Chrom	440434	Reverse	GBBBb23SD	0	441508	438590	0.367718	23S rRNA	23S rrlB	TTTGAGACCT--TAGCTGTTGG	cp32-6
T05TC479	see T05TC449	Chrom	440434	Forward	GBBBb23SD	0	441508	438590	0.36806	23S rRNA	23S rrlB	TTTGAGACCT--TAGCTGTTGG	cp32-6
T05TC187		Chrom	440571	Forward	GBBBb23SD	0	441508	438590	0.32111	23S rRNA	23S rrlB	ATTAGTGCTC--TACCTCTATT	lp5
T06TC448		Chrom	440585	Forward	GBBBb23SD	0	441508	438590	0.316313	23S rRNA	23S rrlB	TCTATTAAAC--TAAAATAAGG	Not done
T06TC259		Chrom	440789	Reverse	GBBBb23SD	0	441508	438590	0.246059	23S rRNA	23S rrlB	ATCGCCCTTT--TAAGACTCGC	lp28-1
T07TC439		Chrom	440933	Reverse	GBBBb23SD	0	441508	438590	0.19671	23S rRNA	23S rrlB	GTTTCAGTTC--TATTTCACTC	lp5		may be either locus
T07TC079		Chrom	441004	Forward	GBBBb23SD	0	441508	438590	0.172721	23S rRNA	23S rrlB	AGCTTTCTAG--TATTTAGCCT	cp9,lp21,lp5
T04TC386		Chrom	441146	Forward	GBBBb23SD	0	441508	438590	0.124058	23S rRNA	23S rrlB	ATTATTCTTC--TATATAAATA	lp5
T09TC307		Chrom	441154	Forward	GBBBb23SD	0	441508	438590	0.121316	23S rRNA	23S rrlB	TCTATATAAA--TATTTTGTAA	lp28-1
T09TC525		Chrom	441177	Forward	GBBBb23SD	0	441508	438590	0.113434	23S rRNA	23S rrlB	TTTTGCTTAT--TACAGACTAA	lp5
T08TC545		Chrom	442200	Forward	BB0421	Reverse	442552	441713	0.419547	haloacid dehalogenase-like hydrolase		TGCATTAGAA--TACCAAGTGT	Complete
T04TC140		Chrom	442344	Forward	BB0421	Reverse	442552	441713	0.247914	haloacid dehalogenase-like hydrolase		CGTTACAAGA--TAATTTTCAT	lp5
T04TC287		Chrom	442357	Reverse	BB0421	Reverse	442552	441713	0.231228	haloacid dehalogenase-like hydrolase		TTTTCATTAA--TACTAATTTC	Complete
T08TC655		Chrom	442574	Reverse	IR BB0421-BB0422	0	442553	442687	0.164179	Intergenic Region	0	TCTTTTAAGA--TATACTATCA	Complete
T10TC015		Chrom	442576	Forward	IR BB0421-BB0422	0	442553	442687	0.171642	Intergenic Region	0	TTTTAAGATA--TACTATCACA		lp5
T08TC088		Chrom	442588	Forward	IR BB0421-BB0422	0	442553	442687	0.261194	Intergenic Region	0	CTATCACAAA--TAATTTATTC	lp5
T06TC280		Chrom	442644	Forward	IR BB0421-BB0422	0	442553	442687	0.679104	Intergenic Region	0	TTAATAATAT--TATATTTTTT	lp21
T07TC125		Chrom	442790	Reverse	BB0422	Reverse	443248	442688	0.816071	DNA-3-methyladenine glycosylase	mag	TTGAACAAAC--TATATTAAAA	cp9,lp28-1
T06TC244		Chrom	443010	Forward	BB0422	Reverse	443248	442688	0.425	DNA-3-methyladenine glycosylase	mag	GTTAAACATA--TAATGCATAC	lp28-1
T07TC140		Chrom	443027	Forward	BB0422	Reverse	443248	442688	0.394643	DNA-3-methyladenine glycosylase	mag	TACCATATAT--TATATACACA	cp9,lp28-1
T06TC076		Chrom	443029	Reverse	BB0422	Reverse	443248	442688	0.389286	DNA-3-methyladenine glycosylase	mag	CCATATATTA--TATACACATA	cp32-4
T05TC485		Chrom	443218	Reverse	BB0422	Reverse	443248	442688	0.0517857	DNA-3-methyladenine glycosylase	mag	GCAACGGTAG--TAGCATCTTG	lp21
T08TC331		Chrom	443740	Forward	IR BBtRNA-Ile-1-BB0423	0	443697	443762	0.661538	Intergenic Region	0	TTTTAAGCTA--TAATTAATAA	Complete
T08P01D06	T08P01D06, T08P02F01	Chrom	446256	Forward	IR BB0425-BB0426	0	446206	446326	0.416667	Intergenic Region	0	ATATTGTCAA--TACCTTTGCA	Not done
T08P02F01	T08P01D06, T08P02F01	Chrom	446256	Forward	IR BB0425-BB0426	0	446206	446326	0.416667	Intergenic Region	0	ATATTGTCAA--TACCTTTGCA	Not done
T05TC074		Chrom	446899	Reverse	IR BB0426-BB0427	0	446891	446968	0.116883	Intergenic Region	0	AAAATTCAAG--TATAACACAA	cp9,lp21,lp17,lp28-2,lp5	cp32-8
T06TC482		Chrom	448243	Forward	BB0429	Reverse	448591	448202	0.894602	conserved hypothetical protein		ATCATATACT--TATAAACCTC		lp28-1
T04TC151		Chrom	449128	Reverse	BB0430	Forward	448705	449310	0.700826	conserved hypothetical protein		AAATTTAACT--TACAACCAAT		lp5
T06TC141		Chrom	449738	Reverse	BB0431	Forward	449419	450171	0.425532	CobQ/CobB/MinD/ParA nucleotide binding domain, putative		AAAAATGCAT--TAACACTGTA	lp5
T08TC023		Chrom	449900	Reverse	BB0431	Forward	449419	450171	0.640957	CobQ/CobB/MinD/ParA nucleotide binding domain, putative		ATAGATACAA--TAACTACTGT	lp5
T06TC139		Chrom	449959	Forward	BB0431	Forward	449419	450171	0.718085	CobQ/CobB/MinD/ParA nucleotide binding domain, putative		TATAAATAAA--TACGACATAA		cp9
T08TC269		Chrom	450053	Forward	BB0431	Forward	449419	450171	0.843085	CobQ/CobB/MinD/ParA nucleotide binding domain, putative		AGGAAAAATA--TAACTATCTC	lp5
T11TC469		Chrom	450089	Forward	BB0431	Forward	449419	450171	0.890957	CobQ/CobB/MinD/ParA nucleotide binding domain, putative		AAAATGCCTG--TATATGAATA	Not done
T06TC166		Chrom	450149	Forward	BB0431	Forward	449419	450171	0.970745	CobQ/CobB/MinD/ParA nucleotide binding domain, putative		TCAAAAGAGA--TAATAAACAA	lp5	cp9
T08TC228		Chrom	450299	Reverse	BB0432	Forward	450174	450887	0.176718	conserved hypothetical protein		TTGACTACAA--TAAGCTAGAT	cp32-6,cp9,lp5
T05TC340		Chrom	450748	Forward	BB0432	Forward	450174	450887	0.805049	conserved hypothetical protein		AAAGAAGTAT--TAGATTTTAT	lp28-1
T04TC385		Chrom	450979	Reverse	BB0433	Reverse	451070	450972	0.918367	conserved hypothetical protein		TAACTACAAA--TAACAAAATA	lp5
T07TC193		Chrom	451234	Forward	BB0434	Reverse	451921	451139	0.878517	stage 0 sporulation protein J	spo0J	TTCCCTTTGA--TATCTATTTT	lp5
T08TC159		Chrom	451432	Forward	BB0434	Reverse	451921	451139	0.62532	stage 0 sporulation protein J	spo0J	AAGGATAAAA--TAACTTTAGC	Complete
T05TC456		Chrom	451579	Forward	BB0434	Reverse	451921	451139	0.43734	stage 0 sporulation protein J	spo0J	AACGAATATT--TATTCATTAT	cp9
T08TC454		Chrom	451765	Forward	BB0434	Reverse	451921	451139	0.199488	stage 0 sporulation protein J	spo0J	ATTTTATATC--TATCATTTGC	Complete
T08TC243		Chrom	451879	Reverse	BB0434	Reverse	451921	451139	0.0524297	stage 0 sporulation protein J	spo0J	TCATTATCAA--TATCTAAAAG	cp32-7,lp38
T08TC441		Chrom	456530	Forward	IR BB0436-BB0437	0	456404	456575	0.736842	Intergenic Region	0	AACATTATAC--TATATAATGT	Complete
T06TC119		Chrom	459643	Forward	BB0439	Forward	459525	459824	0.394649	conserved hypothetical protein		TGGAATCAGA--TATTTGAGGC		cp9
T07TC334		Chrom	465290	Reverse	IR BB0445-BB0446	0	465133	465517	0.411458	Intergenic Region	0	ACCTGAATAA--TAGATTAATT	Complete
T10TC030		Chrom	467642	Reverse	BB0447	Reverse	469387	467282	0.828504	Na+/H+ antiporter	napA	GCTCTCTTAT--TACATCAGCC	Complete
T07TC241		Chrom	468035	Reverse	BB0447	Reverse	469387	467282	0.641805	Na+/H+ antiporter	napA	ATTCAAATGA--TACGCATATG	lp5
T05TC245		Chrom	468329	Reverse	BB0447	Reverse	469387	467282	0.502138	Na+/H+ antiporter	napA	TAATTATTGC--TATTGCGCTA	cp32-3,lp5
T08TC009		Chrom	468563	Forward	BB0447	Reverse	469387	467282	0.391449	Na+/H+ antiporter	napA	TAGTAAGGGC--TAGAGAGAGC	cp9,lp5
T05TC045		Chrom	469412	Forward	BB0448	Reverse	469665	469390	0.92	phosphocarrier protein HPr	ptsH-1	TGAAAAATTA--TATTTTAGCA	Complete
T11TC264		Chrom	469488	Reverse	BB0448	Reverse	469665	469390	0.64	phosphocarrier protein HPr	ptsH-1	ATTTTTTCTT--TGTATATTAT	lp5		anomolous transposition event
T07TC346		Chrom	469777	Reverse	BB0449	Reverse	469971	469678	0.658703	conserved hypothetical protein		CATCTTCTCT--TATATGTATT	cp9,lp21,lp5
T03TC219		Chrom	470341	Reverse	BB0450	Reverse	471220	469961	0.697379	RNA polymerase sigma-54 factor	rpoN	AATGTATATA--TAGCTATTCC	lp5
T10TC045	T10TC045, T10TC355	Chrom	470345	Reverse	BB0450	Reverse	471220	469961	0.694202	RNA polymerase sigma-54 factor	rpoN	TATATATAGC--TATTCCTATT	lp5
T10TC355	T10TC045, T10TC355	Chrom	470345	Forward	BB0450	Reverse	471220	469961	0.694996	RNA polymerase sigma-54 factor	rpoN	TATATATAGC--TATTCCTATT	cp32-6	cp9
T10TC025		Chrom	470962	Reverse	BB0450	Reverse	471220	469961	0.20413	RNA polymerase sigma-54 factor	rpoN	TTTAAAGAAG--TATTTGTTTG	cp9,lp5
T08TC153		Chrom	476096	Forward	BB0456	Forward	475606	476211	0.809917	conserved hypothetical protein		TTTTTTAGAG--TAGTTAAGAG	lp21,lp38
T05TC116		Chrom	477018	Reverse	BB0457	Reverse	478074	476263	0.582551	excinuclease ABC, subunit C	uvrC	AATTCAGCAT--TAGATATGGC	lp28-2
T07TC408		Chrom	477584	Reverse	BB0457	Reverse	478074	476263	0.270017	excinuclease ABC, subunit C	uvrC	CATATGGTAA--TATAGGCAAG		lp5
T10TC161		Chrom	477982	Forward	BB0457	Reverse	478074	476263	0.0508007	excinuclease ABC, subunit C	uvrC	CAATATAGAG--TATTTTTTTA	cp9,lp21,lp5
T10TC160		Chrom	479483	Reverse	BB0458	Forward	478139	479716	0.852885	fibronectin type III domain protein		TGAGGGGTAT--TACATTTATA	cp9,lp5
T07TC227		Chrom	480438	Reverse	BB0459	Forward	479709	481019	0.557252	tetratricopeptide repeat domain protein		CACAACATCT--TATGTTAAAG	Complete
T08TC082		Chrom	480467	Reverse	BB0459	Forward	479709	481019	0.579389	tetratricopeptide repeat domain protein		ATTTTCCTAA--TATTTATACG	Complete
T10TC064		Chrom	480592	Reverse	BB0459	Forward	479709	481019	0.674809	tetratricopeptide repeat domain protein		TATGCAACCT--TATTTTTTCT	Complete
T08TC476		Chrom	481492	Reverse	BB0460	Reverse	482057	481344	0.791024	lipoprotein, putative		TTTAAAATAA--TATTTATATC	cp9,lp5
T09TC111		Chrom	481498	Forward	BB0460	Reverse	482057	481344	0.784011	lipoprotein, putative		ATAATATTTA--TATCTTGGAA	lp5
T04TC344		Chrom	481556	Forward	BB0460	Reverse	482057	481344	0.702665	lipoprotein, putative		TGTTTTCCTT--TAACATAAAA	lp28-1
T08TC631		Chrom	484337	Forward	BB0462	Forward	484254	484586	0.25	putative DNA-binding protein	ebfC	GCGTTAAGAA--TAATATTGAC		lp5
T06TC358		Chrom	484720	Reverse	IR BB0462-BB0463	0	484587	484756	0.792899	Intergenic Region	0	TTTATTTAAT--TATTTTTAAA	cp9,lp5
T09TC052		Chrom	484782	Reverse	BB0463	Forward	484757	485266	0.0510806	nucleoside-diphosphate kinase	ndk	CAAAAAACTT--TATGTATTGT	lp38,lp5
T08TC233		Chrom	484837	Reverse	BB0463	Forward	484757	485266	0.159136	nucleoside-diphosphate kinase	ndk	ATGTAGTTTC--TAGATTTGAA	cp9,lp5
T05TC180		Chrom	484917	Reverse	BB0463	Forward	484757	485266	0.316306	nucleoside-diphosphate kinase	ndk	AAACATTATT--TATATGATGA	cp9,lp5
T11TC547		Chrom	485255	Forward	BB0463	Forward	484757	485266	0.978389	nucleoside-diphosphate kinase	ndk	ATGTGAGCAT--TATTATTGTT	Not done
T09P01B12	T09P01B12, T09P02A02	Chrom	485279	Forward	IR BB0463-BB0464	0	485267	485549	0.0425532	Intergenic Region	0	TTTATAAGTC--TATCTCTTAA	Not done
T09P02A02	T09P01B12, T09P02A02	Chrom	485279	Forward	IR BB0463-BB0464	0	485267	485549	0.0425532	Intergenic Region	0	TTTATAAGTC--TATCTCTTAA	Not done
T11TC365		Chrom	485313	Reverse	IR BB0463-BB0464	0	485267	485549	0.166667	Intergenic Region	0	AAATTACCCT--TATGTTATTC	Not done
T03TC103		Chrom	492228	Reverse	IR BB0472-BB0473	0	491927	490599	0.226316	Intergenic Region	0	TTTTTATTTT--TATAATATTA	Complete		Revised 5' end to match GenBank NC_001318.1 (110513)
T06TC517		Chrom	492322	Reverse	IR BB0472-BB0473	0	491927	490599	0.296992	Intergenic Region	0	TATTTATGAT--TAGTATTAGA	Not done		Revised 5' end to match GenBank NC_001318.1 (110513)
T04TC218	same site: T04TC218, T09TC001	Chrom	493861	Reverse	BB0473	Forward	492588	493952	0.934018	conserved hypothetical integral membrane protein		TATGCTTTTA--TAATTTCAAA	cp9
T09TC001	same site: T04TC218, T09TC001	Chrom	493861	Reverse	BB0473	Forward	492588	493952	0.934018	conserved hypothetical integral membrane protein		TATGCTTTTA--TAATTTCAAA	lp5
T03TC175		Chrom	493891	Reverse	BB0473	Forward	492588	493952	0.956012	conserved hypothetical integral membrane protein		ATTATAATTT--TAATTGCTTT	lp21,lp5
T04TC295		Chrom	494480	Reverse	BB0475	Reverse	494542	494150	0.155612	lipoprotein, putative		TAAAAACAAT--TAAAATGCCA	lp21
T03TC305		Chrom	494781	Forward	IR BB0475-BB0476	0	494543	495033	0.488753	Intergenic Region	0	TTAATGCTAT--TATATGTGTA	lp5		Revised 3' end to match GenBank NC_001318.1 (110513)
T07TC100		Chrom	510844	Forward	BB0505	Forward	510836	511624	0.0101523	conserved hypothetical protein		ATATGCAAGA--TAGCACTATT	lp21,lp5
T09P02A03		Chrom	511063	Forward	BB0505	Forward	510836	511624	0.288071	conserved hypothetical protein		ATGTGTATTC--TAATTGCAAA	cp32-6,cp9
T09TC344		Chrom	511082	Forward	BB0505	Forward	510836	511624	0.312183	conserved hypothetical protein		AATAAATGAT--TACCTAAATA		lp5
T05TC337	see T10P01A03	Chrom	511100	Reverse	BB0505	Forward	510836	511624	0.336294	conserved hypothetical protein		TAAGCAAACA--TATATCTTAA	cp32-7
T10P01A03	T10P01A03, T10P01A07, T10P01A08, T10P01A09, T10P01A10, T10P01A11, T10P01E04, T10P01E07, T10P01F03, T10P01F06, T10P02A05; same site T05TC337	Chrom	511100	Forward	BB0505	Forward	510836	511624	0.335025	conserved hypothetical protein		TAAGCAAACA--TATATCTTAA	Not done
T10P01A07	see T10P01A03	Chrom	511100	Forward	BB0505	Forward	510836	511624	0.335025	conserved hypothetical protein		TAAGCAAACA--TATATCTTAA	Not done
T10P01A08	see T10P01A03	Chrom	511100	Forward	BB0505	Forward	510836	511624	0.335025	conserved hypothetical protein		TAAGCAAACA--TATATCTTAA	Not done
T10P01A09	see T10P01A03	Chrom	511100	Forward	BB0505	Forward	510836	511624	0.335025	conserved hypothetical protein		TAAGCAAACA--TATATCTTAA	Not done
T10P01A10	see T10P01A03	Chrom	511100	Forward	BB0505	Forward	510836	511624	0.335025	conserved hypothetical protein		TAAGCAAACA--TATATCTTAA	Not done
T10P01A11	see T10P01A03	Chrom	511100	Forward	BB0505	Forward	510836	511624	0.335025	conserved hypothetical protein		TAAGCAAACA--TATATCTTAA	Not done
T10P01E04	see T10P01A03	Chrom	511100	Forward	BB0505	Forward	510836	511624	0.335025	conserved hypothetical protein		TAAGCAAACA--TATATCTTAA	Not done
T10P01E07	see T10P01A03	Chrom	511100	Forward	BB0505	Forward	510836	511624	0.335025	conserved hypothetical protein		TAAGCAAACA--TATATCTTAA	Not done
T10P01F03	see T10P01A03	Chrom	511100	Forward	BB0505	Forward	510836	511624	0.335025	conserved hypothetical protein		TAAGCAAACA--TATATCTTAA	Not done
T10P01F06	see T10P01A03	Chrom	511100	Forward	BB0505	Forward	510836	511624	0.335025	conserved hypothetical protein		TAAGCAAACA--TATATCTTAA	Not done
T10P02A05	see T10P01A03	Chrom	511100	Forward	BB0505	Forward	510836	511624	0.335025	conserved hypothetical protein		TAAGCAAACA--TATATCTTAA	Not done
T11P01G01		Chrom	511102	Forward	BB0505	Forward	510836	511624	0.337563	conserved hypothetical protein		AGCAAACATA--TATCTTAAGG	lp21,lp5	cp9
T10TC508		Chrom	511206	Forward	BB0505	Forward	510836	511624	0.469543	conserved hypothetical protein		CAAGGGGTTT--TAAATATGAA		lp5
T05TC386		Chrom	511387	Forward	BB0505	Forward	510836	511624	0.699239	conserved hypothetical protein		ATACCCATGT--TATGACTCAA	cp32-7	lp5
T10P01A12	T10P01A12, T10P01B05, T10P01B10, T10P01C02, T10P01E11, T10P01H05, T10P02H05	Chrom	511427	Reverse	BB0505	Forward	510836	511624	0.751269	conserved hypothetical protein		GGGGACAGCC--TATATTAGTG	Not done
T10P01B05	see T10P01A12	Chrom	511427	Reverse	BB0505	Forward	510836	511624	0.751269	conserved hypothetical protein		GGGGACAGCC--TATATTAGTG	Not done
T10P01B10	see T10P01A12	Chrom	511427	Reverse	BB0505	Forward	510836	511624	0.751269	conserved hypothetical protein		GGGGACAGCC--TATATTAGTG	Not done
T10P01C02	see T10P01A12	Chrom	511427	Reverse	BB0505	Forward	510836	511624	0.751269	conserved hypothetical protein		GGGGACAGCC--TATATTAGTG	Not done
T10P01E11	see T10P01A12	Chrom	511427	Reverse	BB0505	Forward	510836	511624	0.751269	conserved hypothetical protein		GGGGACAGCC--TATATTAGTG	Not done
T10P01H05	see T10P01A12	Chrom	511427	Reverse	BB0505	Forward	510836	511624	0.751269	conserved hypothetical protein		GGGGACAGCC--TATATTAGTG	Not done
T10P02H05	see T10P01A12	Chrom	511427	Reverse	BB0505	Forward	510836	511624	0.751269	conserved hypothetical protein		GGGGACAGCC--TATATTAGTG	Complete
T06TC290		Chrom	511429	Forward	BB0505	Forward	510836	511624	0.752538	conserved hypothetical protein		GGACAGCCTA--TATTAGTGAT	Complete
T03TC017		Chrom	511503	Reverse	BB0505	Forward	510836	511624	0.847716	conserved hypothetical protein		CTTAAGGGCT--TACTTGAATA	lp21,lp28-1
T09TC356		Chrom	511690	Reverse	BB0506	Forward	511605	512396	0.108723	ribosomal RNA large subunit methyltransferase J	tlyA	ATCTTAATTC--TAAAAGGCAA		lp5
T03TC211	T03TC211, T03TC289	Chrom	511702	Reverse	BB0506	Forward	511605	512396	0.123894	ribosomal RNA large subunit methyltransferase J	tlyA	AAAGGCAATA--TATATGTAAA	lp5	lp28-1
T03TC289	see T03TC211	Chrom	511702	Forward	BB0506	Forward	511605	512396	0.12263	ribosomal RNA large subunit methyltransferase J	tlyA	AAAGGCAATA--TATATGTAAA	lp5	cp9
T06TC165		Chrom	511704	Forward	BB0506	Forward	511605	512396	0.125158	ribosomal RNA large subunit methyltransferase J	tlyA	AGGCAATATA--TATGTAAATT	lp5
T10TC372		Chrom	511708	Reverse	BB0506	Forward	511605	512396	0.131479	ribosomal RNA large subunit methyltransferase J	tlyA	AATATATATG--TAAATTCTCA		lp5
T10TC317		Chrom	511738	Reverse	BB0506	Forward	511605	512396	0.169406	ribosomal RNA large subunit methyltransferase J	tlyA	AATCCTAAAA--TATTAATAAA	lp28-1
T10TC409		Chrom	512033	Forward	BB0506	Forward	511605	512396	0.541087	ribosomal RNA large subunit methyltransferase J	tlyA	TTACAGAATT--TAAGATTGTT	lp5
T07TC363		Chrom	512087	Reverse	BB0506	Forward	511605	512396	0.610619	ribosomal RNA large subunit methyltransferase J	tlyA	CATCAATAAG--TATATGTGTA	Complete
T07TC113		Chrom	512281	Reverse	BB0506	Forward	511605	512396	0.855879	ribosomal RNA large subunit methyltransferase J	tlyA	AAAAAGATAT--TAAAGTTAAA	lp28-2,lp5
T08P01A05	T08P01F02, T08P01A05	Chrom	512336	Reverse	BB0506	Forward	511605	512396	0.924147	ribosomal RNA large subunit methyltransferase J	tlyA	TTTTAGTTGT--TAAGTCAAGT	cp9,lp21
T08P01F02	see T08P01A05	Chrom	512336	Reverse	BB0506	Forward	511605	512396	0.925411	ribosomal RNA large subunit methyltransferase J	tlyA	TTTTAGTTGT--TAAGTCAAGT	Not done
T11TC301		Chrom	527481	Reverse	BB0516	Reverse	528047	527361	0.823615	RNA methyltransferase, TrmH family, group 3	yacO	AATTTTCTTT--TATTAGCTTA	Not done
T07TC114		Chrom	527723	Reverse	BB0516	Reverse	528047	527361	0.470845	RNA methyltransferase, TrmH family, group 3	yacO	TTTTGAGTAG--TAATTACAAG	lp5
T08P01H02		Chrom	527736	Reverse	BB0516	Reverse	528047	527361	0.451895	RNA methyltransferase, TrmH family, group 3	yacO	TTACAAGATC--TATACTAAAC	Not done
T09TC135		Chrom	528036	Reverse	BB0516	Reverse	528047	527361	0.0145773	RNA methyltransferase, TrmH family, group 3	yacO	TTTTTTGATA--TATAAAGTTC	lp5		Genomic sequence error - T at 528031 should not be there
T08TC339		Chrom	528038	Forward	BB0516	Reverse	528047	527361	0.0131195	RNA methyltransferase, TrmH family, group 3	yacO	TTTTGATATA--TAAAGTTCAA	lp28-1,lp5
T05TC467		Chrom	528102	Forward	IR BB0516-BB0517	0	528048	528103	0.981818	Intergenic Region	0	GTTATATACA--TATTATGCTT	cp9,lp5
T06TC442		Chrom	531908	Forward	BB0520	Reverse	531967	531851	0.508621	hypothetical protein		TTTTTTTATT--TATAAGAATA	cp9, lp28-1	lp5
T04TC403		Chrom	533599	Forward	BB0522	Forward	532938	533606	0.992504	NH(3)-dependent NAD+ synthetase		TTAAATAATA--TAATTTGAAA	lp28-1		Changed 5' end to match GenBank NC_001318 (110513)
T03TC068		Chrom	533657	Forward	IR BB0522-BB0523	0	533607	533979	0.134409	Intergenic Region	0	TTTTAAATTT--TATTAATAAT	lp5
T06TC275		Chrom	533788	Forward	IR BB0522-BB0523	0	533607	533979	0.486559	Intergenic Region	0	TTTCTTAGTG--TATTAATATT	cp9,lp5
T07TC040		Chrom	534279	Forward	IR BB0523-BB0524	0	534073	534300	0.907489	Intergenic Region	0	AATTTATTAT--TAATAAGAGA	cp9
T07TC483		Chrom	535050	Reverse	BB0524	Forward	534301	535155	0.87822	inositol monophosphatase		TTTTAGAGCC--TAATAATCAT	lp5
T08TC223		Chrom	535153	Reverse	BB0524	Forward	534301	535155	0.998829	inositol monophosphatase		AATCAATAAG--TAAGGTATAA	cp9,lp5
T07TC091		Chrom	538284	Forward	BB0527	Forward	537520	538308	0.969543	transcriptional activator, putative, Baf family		TAGGAAATTC--TATTGACTTT	Complete
T05TC229		Chrom	538409	Forward	BB0528	Reverse	539275	538328	0.914467	aldose reductase, putative		TCTCTTCATA--TACTTTATCA	cp9
T07TC320		Chrom	538937	Forward	BB0528	Reverse	539275	538328	0.356917	aldose reductase, putative		TAGGCCAGTG--TATATAGTAA	cp32-6,cp9
T04TC444		Chrom	538952	Forward	BB0528	Reverse	539275	538328	0.341077	aldose reductase, putative		AGTAAATATC--TATATAATCA	cp9,lp28-1
T06TC573		Chrom	539370	Forward	BB0530	Reverse	540020	539367	0.995406	conserved hypothetical protein		TAAAATTTTA--TAGTTTGTTA	Not done
T05TC257		Chrom	539537	Forward	BB0530	Reverse	540020	539367	0.739663	conserved hypothetical protein		TCTTTGATTT--TAAATAGTTT	cp9
T10TC197		Chrom	539757	Reverse	BB0530	Reverse	540020	539367	0.401225	conserved hypothetical protein		TTAATTCATC--TATGCTAAGT	lp21,lp5
T10TC041		Chrom	539762	Forward	BB0530	Reverse	540020	539367	0.3951	conserved hypothetical protein		TCATCTATGC--TAAGTATAAA	lp28-1,lp5
T07TC261		Chrom	539788	Reverse	BB0530	Reverse	540020	539367	0.353752	conserved hypothetical protein		GTTTTTATAA--TAAATACTGT	lp28-1,lp5
T09TC241		Chrom	540126	Reverse	IR BB0530-BB0531	0	540021	540158	0.773723	Intergenic Region	0	GTATTTTGAA--TATATCTTTT	lp28-1,lp5
T03TC181		Chrom	540722	Forward	BB0531	Reverse	540773	540159	0.0830619	conserved hypothetical protein		CTATGAGCTT--TATTTGTTAA	cp9,lp5
T04TC155		Chrom	541211	Forward	BB0532	Reverse	542069	541182	0.967306	conserved hypothetical protein		TCAGTTTCAG--TAGATGCAAT	Complete
T11TC466		Chrom	541491	Forward	BB0532	Reverse	542069	541182	0.651635	conserved hypothetical protein		CTTTTTTATA--TATGTTATTC	lp5
T10TC034		Chrom	544921	Forward	BB0536	Forward	544586	547387	0.1196	zinc protease, putative		GTGCTGACAT--TAATGCTGCT	lp5
T10P01G02		Chrom	545431	Reverse	BB0536	Forward	544586	547387	0.302035	zinc protease, putative		TTGGAGAGCC--TAGTTTAATG	Not done
T10TC270		Chrom	546409	Forward	BB0536	Forward	544586	547387	0.650839	zinc protease, putative		AAGAATCATA--TATTTCTGGA	cp9,lp28-1,lp5
T07TC157		Chrom	546560	Forward	BB0536	Forward	544586	547387	0.704748	zinc protease, putative		TAGTTCTGAT--TATCATTTTC	cp9,lp5
T06TC328		Chrom	546797	Reverse	BB0536	Forward	544586	547387	0.789718	zinc protease, putative		AATAAACGAG--TATAAAGATT	Complete
T07TC292		Chrom	546909	Forward	BB0536	Forward	544586	547387	0.829347	zinc protease, putative		TTTAATTATT--TAGCAGAGAC	lp5
T06TC462		Chrom	547072	Forward	BB0536	Forward	544586	547387	0.88754	zinc protease, putative		CTATTTTTTT--TACTACCGAG	Not done
T11TC136		Chrom	548299	Forward	BB0537	Reverse	548490	547846	0.296584	tetratricopeptide repeat domain protein		TCCATATCAA--TATTGTCCTA	lp21
T08TC134		Chrom	552068	Reverse	BB0541	Forward	552007	552225	0.284404	hypothetical protein		ATATCACAAG--TAGATTACGA	cp9,lp28-1,lp5
T07TC489		Chrom	552156	Reverse	BB0541	Forward	552007	552225	0.688073	hypothetical protein		CAAGACATTT--TAGCGCAATA	lp28-1,lp5
T05TC330		Chrom	553009	Forward	BB0542	Forward	552440	553018	0.984429	tetratricopeptide repeat domain protein		CTTCTATTCT--TAAGAGTTAA	cp32-7
T03TC312		Chrom	556559	Forward	BB0545	Forward	555216	556580	0.984604	xylulokinase	xylB	TTAATAATTA--TAGTCTATTT	lp28-1
T09TC390		Chrom	562116	Forward	IR BB0551-BB0552	0	561965	562184	0.689498	Intergenic Region	0	ACAGTTTGTA--TAGTAAAGTC		lp5
T05TC508		Chrom	564193	Reverse	BB0553	Reverse	565681	564188	0.995981	conserved hypothetical protein		TATTTTTATT--TAATTATTTT	lp5
T10TC101		Chrom	564542	Forward	BB0553	Reverse	565681	564188	0.762894	conserved hypothetical protein		TATTTTCTTC--TAGATCTCGG	lp21	cp32-8,lp5
T11TC473		Chrom	565489	Reverse	BB0553	Reverse	565681	564188	0.12793	conserved hypothetical protein		TCATAAGAAA--CTATGTTTTT	Not done		anomolous transposition event
T03TC280		Chrom	565681	Forward	BB0553	Reverse	565681	564188	0	conserved hypothetical protein		GTTTTATTCA--TAAGGTCCTT	lp5
T05TC511		Chrom	565711	Forward	IR BB0553-BB0554	0	565682	565942	0.111538	Intergenic Region	0	AGAAAACATC--TATAATTTAT	cp9,lp5
T06TC495		Chrom	566083	Forward	BB0554	Forward	565943	567823	0.0744681	conserved hypothetical protein		GCATCAGTTA--TAAAGATAAT	Not done
T08TC448		Chrom	566089	Forward	BB0554	Forward	565943	567823	0.0776596	conserved hypothetical protein		GTTATAAAGA--TAATATAACT	lp5
T07TC330		Chrom	566094	Reverse	BB0554	Forward	565943	567823	0.0808511	conserved hypothetical protein		AAAGATAATA--TAACTTTAAA	lp21
T09TC312		Chrom	566269	Forward	BB0554	Forward	565943	567823	0.173404	conserved hypothetical protein		ATGCGAATAG--TAGTTATTCT	lp5
T07TC341		Chrom	566350	Forward	BB0554	Forward	565943	567823	0.216489	conserved hypothetical protein		GCGATTACAA--TAGTTTTTCA	Complete
T05TC244		Chrom	566503	Reverse	BB0554	Forward	565943	567823	0.298404	conserved hypothetical protein		ATTCTCTTGA--TAATTACTGG	lp5
T07TC335	same site: T07TC335, T09TC532	Chrom	566965	Forward	BB0554	Forward	565943	567823	0.543617	conserved hypothetical protein		GTGATTATGC--TAGTTTTTTA	lp28-1
T09TC532	same site: T07TC335, T09TC532	Chrom	566965	Forward	BB0554	Forward	565943	567823	0.543617	conserved hypothetical protein		GTGATTATGC--TAGTTTTTTA		lp5
T06TC293	same site: T06TC293, T08TC103	Chrom	567089	Reverse	BB0554	Forward	565943	567823	0.610106	conserved hypothetical protein		TGGTTTTGCT--TATTTGAATT	cp9,lp5
T08TC103	same site: T06TC293, T08TC103	Chrom	567089	Forward	BB0554	Forward	565943	567823	0.609574	conserved hypothetical protein		TGGTTTTGCT--TATTTGAATT		lp5
T08TC046		Chrom	567423	Reverse	BB0554	Forward	565943	567823	0.787766	conserved hypothetical protein		AAGGAAAAAA--TAGCTATTAG	cp9,lp38
T09TC345		Chrom	567741	Forward	BB0554	Forward	565943	567823	0.956383	conserved hypothetical protein		TTGATTCAGG--TATTTGATTT	Complete
T05TC469		Chrom	567802	Reverse	BB0554	Forward	565943	567823	0.989362	conserved hypothetical protein		ATAGTTGGAG--TATAAAAATT	Complete
T07TC018		Chrom	567917	Reverse	BB0555	Forward	567810	568277	0.231263	conserved hypothetical protein		CTAAGAGCAA--TAGTTTGGAG	Complete
T11TC371		Chrom	567988	Reverse	BB0555	Forward	567810	568277	0.383298	conserved hypothetical protein		TATTCTGATT--TAATTCCCGC	lp28-1, lp5
T05TC323	same site: T05TC323, T08TC045	Chrom	568021	Reverse	BB0555	Forward	567810	568277	0.453961	conserved hypothetical protein		GGTCGGAATG--TAGTTACCCT	Complete
T08TC045	same site: T05TC323, T08TC045	Chrom	568021	Reverse	BB0555	Forward	567810	568277	0.453961	conserved hypothetical protein		GGTCGGAATG--TAGTTACCCT	Complete
T09TC418		Chrom	568211	Reverse	BB0555	Forward	567810	568277	0.860814	conserved hypothetical protein		AATGTAATTG--TATGGATGTT	Not done
T05TC357		Chrom	568220	Forward	BB0555	Forward	567810	568277	0.877944	conserved hypothetical protein		GTATGGATGT--TAATACTTTT	cp32-7,cp32-9
T10TC417		Chrom	568223	Reverse	BB0555	Forward	567810	568277	0.88651	conserved hypothetical protein		TGGATGTTAA--TACTTTTTTA	lp5
T08TC422		Chrom	568275	Reverse	BB0556	Forward	568270	569139	0.00690449	conserved hypothetical protein		AAAAAATGGC--TAATGTTAAG	lp28-1,lp5
T10TC010		Chrom	568449	Forward	BB0556	Forward	568270	569139	0.205984	conserved hypothetical protein		AAAAATTTAA--TAAGGTATCT	cp9,lp5
T08TC444	T08TC444, T08TC669	Chrom	568583	Reverse	BB0556	Forward	568270	569139	0.361335	conserved hypothetical protein		AAAATATATT--TAAATAGTAT	Complete
T08TC669	see T08TC444	Chrom	568583	Reverse	BB0556	Forward	568270	569139	0.361335	conserved hypothetical protein		AAAATATATT--TAAATAGTAT	lp5
T05TC188		Chrom	568719	Reverse	BB0556	Forward	568270	569139	0.517837	conserved hypothetical protein		TTAGTGCTTA--TAATTTAAAT	cp9
T05TC138		Chrom	568740	Reverse	BB0556	Forward	568270	569139	0.542002	conserved hypothetical protein		GAGCTGAATA--TATTGCAAAT	lp5
T09TC414		Chrom	569072	Reverse	BB0556	Forward	568270	569139	0.924051	conserved hypothetical protein		AATTTCAACA--TAGGAGAGAG	lp21
T06TC498		Chrom	572234	Reverse	BB0560	Reverse	573842	571890	0.823258	heat shock protein 90	htpG	TTTACTTTTG--TAAGGGTATC	Not done
T04TC449		Chrom	572418	Forward	BB0560	Reverse	573842	571890	0.729508	heat shock protein 90	htpG	TATAAGCAGC--TACTATTGGG	cp9	lp38
T07TC283		Chrom	572550	Forward	BB0560	Reverse	573842	571890	0.661885	heat shock protein 90	htpG	ATTTAAACCT--TATTAATGAT	cp9
T04TC129		Chrom	572679	Reverse	BB0560	Reverse	573842	571890	0.595287	heat shock protein 90	htpG	CAAGCTCGCT--TAGTATTTTT	Complete
T06P01B03		Chrom	572775	Reverse	BB0560	Reverse	573842	571890	0.546107	heat shock protein 90	htpG	CTTGGCAGTC--TATAATTCCT	cp9,lp5	lp38
T10TC211		Chrom	572796	Reverse	BB0560	Reverse	573842	571890	0.535348	heat shock protein 90	htpG	TTATAAATCT--TAGATAGTTT	lp5
T05TC354		Chrom	572927	Reverse	BB0560	Reverse	573842	571890	0.468238	heat shock protein 90	htpG	AATAAATTAG--TATATTCCAA	Complete
T09TC283		Chrom	576238	Reverse	BB0563	Reverse	576526	575981	0.526606	conserved hypothetical protein		TCCAAAATAT--TAGCAGCTCC	lp38,lp28-1,lp5
T09P01A02	T08P01A02, T08P01D04	Chrom	576258	Reverse	BB0563	Reverse	576526	575981	0.489908	conserved hypothetical protein		CGGGAATGTG--TATATGTAGA	cp9
T09P01D04	T08P01A02, T08P01D04	Chrom	576258	Reverse	BB0563	Reverse	576526	575981	0.489908	conserved hypothetical protein		CGGGAATGTG--TATATGTAGA	Not done
T03TC007		Chrom	576316	Forward	BB0563	Reverse	576526	575981	0.385321	conserved hypothetical protein		GAAAACAAAT--TATTTACTCC	cp9
T09TC115		Chrom	576469	Reverse	BB0563	Reverse	576526	575981	0.102752	conserved hypothetical protein		AATAAAATAA--TAATTGTCAT	Complete
T11P01H04		Chrom	576508	Forward	BB0563	Reverse	576526	575981	0.0330275	conserved hypothetical protein		ATTGCTTTAT--TATCTCCTAA	Complete
T05TC540		Chrom	576569	Forward	IR BB0563-BB0564	0	576527	576581	0.777778	Intergenic Region	0	TTTTTTTATC--TAAAAAGTGA	cp9,lp5
T07TC133		Chrom	577086	Reverse	BB0564	Reverse	577187	576582	0.165289	conserved hypothetical protein		TTTGTCCAGT--TATATTGTTT	lp17,lp28-2,lp5
T03TC108	same site:T03TC108, T04TC431,T05TC338	Chrom	577479	Forward	BB0565	Forward	577395	577937	0.154982	purine-binding chemotaxis protein	cheW-2	TGAGATTAAA--TATGTTGTTG	lp21,lp5
T04TC431	see T03TC108	Chrom	577479	Forward	BB0565	Forward	577395	577937	0.154982	purine-binding chemotaxis protein	cheW-2	TGAGATTAAA--TATGTTGTTG	Complete
T05TC338	see T03TC108	Chrom	577479	Forward	BB0565	Forward	577395	577937	0.154982	purine-binding chemotaxis protein	cheW-2	TGAGATTAAA--TATGTTGTTG	lp5
T05TC182		Chrom	577796	Reverse	BB0565	Forward	577395	577937	0.741697	purine-binding chemotaxis protein	cheW-2	GATCAGGGTT--TAATTCAAAA	Complete
T06TC019		Chrom	577909	Forward	BB0565	Forward	577395	577937	0.948339	purine-binding chemotaxis protein	cheW-2	AATACAACAA--TATATGATCC	Complete
T05TC474		Chrom	577945	Reverse	IR BB0565-BB0566	0	577938	577949	0.727273	Intergenic Region	0	TAGGAGTTTT--TAGTCATGAT	Complete
T06TC224		Chrom	578117	Reverse	BB0566	Forward	577950	578261	0.540193	Sulphate transporter and anti-Sigma factor (STAS) antagonist domain protein	sulP	ATGCATCTAA--TAAATATGCT	lp5
T07TC415		Chrom	578419	Forward	BB0567	Forward	578277	580421	0.0662313	chemotaxis histidine kinase	cheA-1	TTTAGAAATT--TACATACCAT	Complete
T09P01B07		Chrom	578422	Reverse	BB0567	Forward	578277	580421	0.0685634	chemotaxis histidine kinase	cheA-1	GAAATTTACA--TACCATAAAG		lp5
T10P01B09		Chrom	578444	Forward	BB0567	Forward	578277	580421	0.0778918	chemotaxis histidine kinase	cheA-1	GAAGTTCTGG--TATGTTTGGC	lp5
T05TC515		Chrom	578621	Reverse	BB0567	Forward	578277	580421	0.160914	chemotaxis histidine kinase	cheA-1	TCGACTTTGA--TAAGCGTAAA	lp28-1,lp5
T06TC235		Chrom	579078	Forward	BB0567	Forward	578277	580421	0.373601	chemotaxis histidine kinase	cheA-1	ATTGGATAAA--TGTTTAGAGG	Complete		anomolous transposition event
T04TC006		Chrom	579263	Reverse	BB0567	Forward	578277	580421	0.460354	chemotaxis histidine kinase	cheA-1	GCAAGGTTAA--TATTGCTAGT	Complete
T07TC398		Chrom	579329	Forward	BB0567	Forward	578277	580421	0.490672	chemotaxis histidine kinase	cheA-1	GAGAACTTGT--TACAATACAA	Complete
T04TC229	same site: T04TC229, T09TC016	Chrom	580357	Forward	BB0567	Forward	578277	580421	0.970149	chemotaxis histidine kinase	cheA-1	GGAGCTACTA--TACTTGGTGA	cp9,lp28-1,lp5
T09TC016	same site: T04TC229, T09TC016	Chrom	580357	Forward	BB0567	Forward	578277	580421	0.970149	chemotaxis histidine kinase	cheA-1	GGAGCTACTA--TACTTGGTGA	lp5
T11TC448		Chrom	580493	Forward	BB0568	Forward	580486	581643	0.00605013	chemotaxis response regulator protein-glutamate methylesterase	cheB-2	ATAATGAAGA--TATTAGTAAT	Not done
T07TC003		Chrom	580784	Reverse	BB0568	Forward	580486	581643	0.258427	chemotaxis response regulator protein-glutamate methylesterase	cheB-2	AAGGTTAAAT--TAATAATAAA	Complete
T03TC149		Chrom	581301	Reverse	BB0568	Forward	580486	581643	0.705272	chemotaxis response regulator protein-glutamate methylesterase	cheB-2	TAATAATTGC--TAATGGAAGT	cp9
T04TC187		Chrom	581360	Reverse	BB0568	Forward	580486	581643	0.756266	chemotaxis response regulator protein-glutamate methylesterase	cheB-2	GTAAACCTAT--TAGATGGACC	lp5
T04TC362		Chrom	581376	Forward	BB0568	Forward	580486	581643	0.769231	chemotaxis response regulator protein-glutamate methylesterase	cheB-2	GACCTCTTGT--TAGTAGACAT	Complete
T05TC073	T05TC073, T05TC176	Chrom	582414	Forward	BB0569	Forward	581645	583417	0.433973	conserved hypothetical protein		TTGCAACATT--TAAATATTAT	lp17,lp28-2,lp5	cp32-8
T05TC176	see T05TC073	Chrom	582414	Forward	BB0569	Forward	581645	583417	0.433973	conserved hypothetical protein		TTGCAACATT--TAAATATTAT	Complete
T03TC174		Chrom	583084	Forward	BB0569	Forward	581645	583417	0.812077	conserved hypothetical protein		AGAATATAGC--TATTGATAAT	Complete
T06TC289		Chrom	583191	Forward	BB0569	Forward	581645	583417	0.87246	conserved hypothetical protein		AATTCTCTTT--TAGATATAGA	Complete
T11TC382		Chrom	583404	Forward	BB0569	Forward	581645	583417	0.992664	conserved hypothetical protein		GAGGGTAGTG--TAATTTTGTT	Not done
T04TC356		Chrom	583498	Reverse	BB0570	Forward	583458	583832	0.109626	chemotaxis response regulator	cheY-2	AATAGGGCAA--TAAGGCAAAG	lp5
T05TC099		Chrom	583576	Reverse	BB0570	Forward	583458	583832	0.318182	chemotaxis response regulator	cheY-2	GAAGGGGTTT--TAAGGTTTAA	lp28-1,lp5
T05TC230		Chrom	583678	Reverse	BB0570	Forward	583458	583832	0.590909	chemotaxis response regulator	cheY-2	ATTAAGCAGA--TAAGAGAATT	Complete
T08TC524		Chrom	586201	Forward	IR BB0572-BB0573	0	586157	586211	0.814815	Intergenic Region	0	TAACTTTTAA--TATATTAAGG	Complete		Poor quality sequence
T03TC310		Chrom	586735	Reverse	BB0573	Forward	586212	587024	0.64532	ABC transporter, ATP-binding protein		CTTTCTAATT--TAAAGGATAG	lp5
T10TC028		Chrom	587692	Forward	BB0574	Forward	587031	587882	0.776733	conserved hypothetical integral membrane protein		TTAGGCGACC--TATTTTTTAA	lp5
T05TC565		Chrom	589846	Forward	BB0576	Reverse	590232	589684	0.70438	conserved hypothetical protein		TTTCATAGAT--TATATCGTTT	cp9
T09TC269		Chrom	589915	Reverse	BB0576	Reverse	590232	589684	0.576642	conserved hypothetical protein		TTGCAGATAA--TATATTATAA	lp38
T08P01F04		Chrom	589956	Forward	BB0576	Reverse	590232	589684	0.50365	conserved hypothetical protein		AGAGAGTTGT--TAGTAAGAGT	Not done
T03TC171		Chrom	590050	Reverse	BB0576	Reverse	590232	589684	0.330292	conserved hypothetical protein		AGATAACAAT--TATTTTATAT	lp5
T06TC282		Chrom	590203	Reverse	BB0576	Reverse	590232	589684	0.0510949	conserved hypothetical protein		TGAATTTGAT--TAACATAATT	Complete
T11TC250		Chrom	590248	Reverse	IR BB0576-BB0577	0	590233	590347	0.140351	Intergenic Region	0	TAATTATAAT--TAGTATATAA		lp5
T11TC326		Chrom	590478	Forward	BB0577	Forward	590348	590935	0.221465	conserved hypothetical protein		ACTAAGTACA--TACTTCTCAA	Not done
T11TC455		Chrom	590769	Reverse	BB0577	Forward	590348	590935	0.71891	conserved hypothetical protein		TTATTTACAG--TAGAATCAGA	Not done
T09TC035		Chrom	591002	Forward	IR BB0577-BB0578	0	590936	591187	0.262948	Intergenic Region	0	TTTGTATCTT--TAGATGGTTT	lp5
T11TC532		Chrom	591287	Forward	BB0578	Forward	591188	592357	0.0846878	methyl-accepting chemotaxis protein	mcp1	TACTTACGAA--TATAAGGCTC	Not done
T09TC032		Chrom	591778	Forward	BB0578	Forward	591188	592357	0.504705	methyl-accepting chemotaxis protein	mcp1	TTGATATTGA--TAAGTTCTTT	lp5
T03TC194		Chrom	591895	Forward	BB0578	Forward	591188	592357	0.60479	methyl-accepting chemotaxis protein	mcp1	GTATAGATGC--TAATATGGCT	cp9,lp5
T08TC289		Chrom	592317	Forward	BB0578	Forward	591188	592357	0.965783	methyl-accepting chemotaxis protein	mcp1	AAAAAGATGG--TAATTGAATT	lp5	cp9
T04TC277		Chrom	596862	Forward	BB0581	Forward	596531	598591	0.16068	DNA recombinase	recG	GTTTTTAAAA--TAGATAAAAA	lp5
T05TC221		Chrom	597030	Reverse	BB0581	Forward	596531	598591	0.242718	DNA recombinase	recG	AAAATTTCAT--TATATGTAAA	cp9
T08TC146		Chrom	597036	Forward	BB0581	Forward	596531	598591	0.245146	DNA recombinase	recG	TCATTATATG--TAAAAGAAGC	cp32-7,cp32-6,cp9,lp21
T05TC583	T05TC583, T05TC585	Chrom	597790	Forward	BB0581	Forward	596531	598591	0.611165	DNA recombinase	recG	CTGCAACACC--TATTCCTAGA	cp9,lp5
T05TC585	see T05TC583	Chrom	597790	Forward	BB0581	Forward	596531	598591	0.611165	DNA recombinase	recG	CTGCAACACC--TATTCCTAGA	Complete
T06TC410		Chrom	598565	Reverse	BB0581	Forward	596531	598591	0.987864	DNA recombinase	recG	TTTTTGTTCT--TATTTGAATG	Not done
T09P01F08	T09P01F08, T09P02H02	Chrom	598714	Forward	BB0582	Reverse	599376	598588	0.840102	carboxypeptidase, putative		GTCCTATGTA--TAAGTAGTGC	lp28-1
T09P02H02	T09P01F08, T09P02H02	Chrom	598714	Forward	BB0582	Reverse	599376	598588	0.840102	carboxypeptidase, putative		GTCCTATGTA--TAAGTAGTGC	lp28-1,lp5
T10P01C03		Chrom	598737	Forward	BB0582	Reverse	599376	598588	0.810914	carboxypeptidase, putative		GGCTCTGCTT--TATATCCAGT	Not done
T05TC305		Chrom	598846	Reverse	BB0582	Reverse	599376	598588	0.67132	carboxypeptidase, putative		AATTATCATC--TATATTTATA	cp9,lp5
T03TC167		Chrom	599353	Reverse	BB0582	Reverse	599376	598588	0.0279188	carboxypeptidase, putative		TAAATAGAAA--TAATAAAGCA	lp5
T04TC424		Chrom	599376	Reverse	IR BB0582-BB0583	0	599377	599494	0	Intergenic Region	0	ATTGATTTCA--TATTATTTAA	Complete
T11TC481		Chrom	599427	Reverse	IR BB0582-BB0583	0	599377	599494	0.435897	Intergenic Region	0	ATTCTAAATA--TATGTATATT	Not done
T11TC391		Chrom	599485	Forward	IR BB0582-BB0583	0	599377	599494	0.923077	Intergenic Region	0	GGAGACTGTA--TATAAGGAAT	Not done
T06TC473		Chrom	599847	Reverse	BB0583	Forward	599495	600844	0.261675	conserved hypothetical protein		AGAAACATTA--TAAAGCTATT	lp5
T06TC132		Chrom	600888	Forward	IR BB0583-BB0584	0	600845	600997	0.282895	Intergenic Region	0	AAGATTTTAA--TAATCTTGGT	lp28-1,lp5
T06TC450		Chrom	601240	Forward	BB0584	Forward	600998	602344	0.179792	conserved hypothetical integral membrane protein		ATATAATTGC--TACAAGACAA	Complete
T07TC014		Chrom	601299	Reverse	BB0584	Forward	600998	602344	0.224368	conserved hypothetical integral membrane protein		TTTATTAGTA--TATTAACTAT	Complete
T11P01D05		Chrom	601452	Reverse	BB0584	Forward	600998	602344	0.337296	conserved hypothetical integral membrane protein		TTTGCAATCA--TAAAAGGACT	lp21
T06TC592		Chrom	602010	Forward	BB0584	Forward	600998	602344	0.751857	conserved hypothetical integral membrane protein		GTATTGTTTA--TATTTTCATT	Not done
T08TC446		Chrom	603714	Reverse	BB0585	Forward	602374	603729	0.989668	UDP-N-acetylmuramoylalanine--D-glutamate ligase	murD	AAAATTTAGT--TAATAATCTT	cp9
T11TC513		Chrom	607172	Reverse	BB0588	Forward	607138	607935	0.0439147	5-methylthioadenosine/S-adenosylhomocysteine nucleosidase, putative	pfs-2	TTTATTTTTT--TATTAGTTTT	Not done
T06TC532		Chrom	607226	Reverse	BB0588	Forward	607138	607935	0.111669	5-methylthioadenosine/S-adenosylhomocysteine nucleosidase, putative	pfs-2	AATGTTTTAA--TAGTAACTGC	Not done
T04TC305		Chrom	607303	Reverse	BB0588	Forward	607138	607935	0.208281	5-methylthioadenosine/S-adenosylhomocysteine nucleosidase, putative	pfs-2	TCTTAAGGAG--TATGGTCTTA	lp5
T06TC117		Chrom	607440	Forward	BB0588	Forward	607138	607935	0.378921	5-methylthioadenosine/S-adenosylhomocysteine nucleosidase, putative	pfs-2	GTCATGTCAT--TAATTCTGGC	lp5
T05TC447		Chrom	607477	Reverse	BB0588	Forward	607138	607935	0.4266	5-methylthioadenosine/S-adenosylhomocysteine nucleosidase, putative	pfs-2	TAGTGCTAAA--TACAAAGATA	lp21
T10TC422		Chrom	607968	Forward	IR BB0588-BB0589	0	607936	608019	0.385542	Intergenic Region	0	GAAAATCATG--TATGAAAAAA	Complete
T04TC046		Chrom	609797	Forward	BB0590	Reverse	609906	609061	0.128994	dimethyladenosine transferase	ksgA	GTTGATTAAA--TAGTTTTGTC	lp5
T06TC223		Chrom	609982	Reverse	BB0591	Reverse	611193	609943	0.968	competence locus E, putative		TAATGTAAGT--TATAAGAAAA	lp28-1
T05TC209		Chrom	609997	Forward	BB0591	Reverse	611193	609943	0.9568	competence locus E, putative		GAAAAATACT--TAATATTAAA	Complete
T08TC055		Chrom	610138	Reverse	BB0591	Reverse	611193	609943	0.8432	competence locus E, putative		AAAAGTAAGT--TATTAAGCTT	lp5
T09TC366		Chrom	610238	Reverse	BB0591	Reverse	611193	609943	0.7632	competence locus E, putative		ATTATTGATA--TAAATTACTG	lp21	lp28-1,lp5
T11TC451		Chrom	610469	Reverse	BB0591	Reverse	611193	609943	0.5784	competence locus E, putative		AATTAGTTTG--TATATTATAA	Not done
T04TC123		Chrom	610531	Forward	BB0591	Reverse	611193	609943	0.5296	competence locus E, putative		ATCCAGTTAA--TATTAGATAA	Complete
T10TC293		Chrom	610902	Forward	BB0591	Reverse	611193	609943	0.2328	competence locus E, putative		TTTTTGAAGC--TATATTTGTA	Complete
T05TC022		Chrom	611123	Forward	BB0591	Reverse	611193	609943	0.056	competence locus E, putative		TGTGTTAAAA--TAAATTAAAT	lp5
T08TC106		Chrom	618755	Forward	IR BB0596-BB0597	0	618560	618827	0.730337	Intergenic Region	0	TAATTATTTA--TATATGATTT	cp9,lp5
T06TC580		Chrom	619071	Reverse	BB0597	Forward	618828	621035	0.110557	methyl-accepting chemotaxis protein	mcp3	AAGAGATAGC--TATAGGTTTG	Not done
T05TC575		Chrom	619190	Forward	BB0597	Forward	618828	621035	0.164024	methyl-accepting chemotaxis protein	mcp3	AATTTAACTC--TATAGATAAA	Complete
T09TC354		Chrom	619650	Forward	BB0597	Forward	618828	621035	0.372451	methyl-accepting chemotaxis protein	mcp3	AGTTATAGCT--TATGCTAAAA	lp21
T05TC433		Chrom	620570	Forward	BB0597	Forward	618828	621035	0.789307	methyl-accepting chemotaxis protein	mcp3	GAAAGCTTGC--TATTAATTCT	lp5
T11TC259		Chrom	620591	Reverse	BB0597	Forward	618828	621035	0.799275	methyl-accepting chemotaxis protein	mcp3	GAAAATATTC--TAAAACCATT	Complete
T08TC349		Chrom	620630	Forward	BB0597	Forward	618828	621035	0.816493	methyl-accepting chemotaxis protein	mcp3	TCGACAGCAT--TATTGCAGTA	lp21,lp5
T05TC458		Chrom	627036	Reverse	BB0602	Forward	626286	627038	0.99867	chaperonin, putative		AAATATAAGG--TAATCCTCAA	lp5
T09TC412		Chrom	629236	Reverse	BB0604	Reverse	630698	629196	0.972703	L-lactate permease	lctP	TAAAATGTAG--TATAAAGCAT	lp21	lp5
T09TC500		Chrom	629250	Forward	BB0604	Reverse	630698	629196	0.964048	L-lactate permease	lctP	AAGCATAAAT--TATTGTTTTT	Complete
T08TC492		Chrom	629307	Reverse	BB0604	Reverse	630698	629196	0.925433	L-lactate permease	lctP	TTGTTGTTGC--TATTGTGATG	Complete
T11TC275		Chrom	629762	Forward	BB0604	Reverse	630698	629196	0.623169	L-lactate permease	lctP	GGATAAATGC--TAATAGTGCT		lp5
T03TC223		Chrom	630654	Forward	BB0604	Reverse	630698	629196	0.0292943	L-lactate permease	lctP	CAATAATTAT--TAGGATTATT		lp5
T08TC458		Chrom	630781	Reverse	BB0605	Forward	630769	631986	0.010682	serine-type D-Ala-D-Ala carboxypeptidase	dacA	GAATAGTATC--TATGTTATTG	lp5	lp28-3,lp38
T04TC359		Chrom	630835	Reverse	BB0605	Forward	630769	631986	0.0550534	serine-type D-Ala-D-Ala carboxypeptidase	dacA	CCCGTTTTGT--TATAATCTTT	cp9,lp5
T09TC288		Chrom	630918	Reverse	BB0605	Forward	630769	631986	0.123254	serine-type D-Ala-D-Ala carboxypeptidase	dacA	ATTTTGATAC--TAAGCGAATA	lp5
T08TC493		Chrom	631066	Forward	BB0605	Forward	630769	631986	0.244043	serine-type D-Ala-D-Ala carboxypeptidase	dacA	TTCTGCTTCA--TATTATAATG	Complete
T07TC226		Chrom	631802	Forward	BB0605	Forward	630769	631986	0.848809	serine-type D-Ala-D-Ala carboxypeptidase	dacA	AAAATTAATA--TAAGTTATAC	cp9
T06TC509		Chrom	632037	Forward	BB0606	Forward	631991	632482	0.0936864	chemoreceptor glutamine deamidase	cheD	GTTACAATAA--TAGTTCCTGG	Complete
T10P01G11		Chrom	632960	Forward	BB0607	Forward	632485	634464	0.24002	rep helicase, single-stranded DNA-dependent ATPase	rep	CTTAATGATT--TAAAGGAAGA	Not done
T05TC556		Chrom	633078	Forward	BB0607	Forward	632485	634464	0.299646	rep helicase, single-stranded DNA-dependent ATPase	rep	ATAATTCTGA--TATTAGAAAT		lp5
T09TC278		Chrom	633081	Forward	BB0607	Forward	632485	634464	0.301162	rep helicase, single-stranded DNA-dependent ATPase	rep	ATTCTGATAT--TAGAAATAAA	lp5
T08TC658		Chrom	633087	Reverse	BB0607	Forward	632485	634464	0.304699	rep helicase, single-stranded DNA-dependent ATPase	rep	ATATTAGAAA--TAAATATTCT	lp5
T11TC416		Chrom	633561	Forward	BB0607	Forward	632485	634464	0.543709	rep helicase, single-stranded DNA-dependent ATPase	rep	AAATGATTTT--TAGAAGACAA	Not done
T07TC110		Chrom	634201	Reverse	BB0607	Forward	632485	634464	0.86761	rep helicase, single-stranded DNA-dependent ATPase	rep	AGAATTTGAT--TATGTATTTT	cp9,lp28-1,lp5
T10TC037		Chrom	634353	Reverse	BB0607	Forward	632485	634464	0.944416	rep helicase, single-stranded DNA-dependent ATPase	rep	CTAATAAGCG--TAAAAAAGAT		lp5
T05TC522		Chrom	634506	Reverse	IR BB0607-BB0608	0	634465	634580	0.365217	Intergenic Region	0	AAGATTAATT--TAGTATATTA	lp5
T05TC321		Chrom	634514	Forward	IR BB0607-BB0608	0	634465	634580	0.426087	Intergenic Region	0	TTTAGTATAT--TATATTATTA		lp5
T06TC018		Chrom	634545	Forward	IR BB0607-BB0608	0	634465	634580	0.695652	Intergenic Region	0	AATCCAAGTA--TATTTATGGA	Complete
T09TC385		Chrom	634718	Forward	BB0608	Forward	634581	636011	0.0958042	aminoacyl-histidine dipeptidase	pepD	GTGTTGGTAA--TATTGTAGTG	Complete
T09TC096		Chrom	635005	Reverse	BB0608	Forward	634581	636011	0.297203	aminoacyl-histidine dipeptidase	pepD	ATAGGTTTAA--TAGGTGCTCT	lp28-1
T10P02B05		Chrom	635132	Reverse	BB0608	Forward	634581	636011	0.386014	aminoacyl-histidine dipeptidase	pepD	TTTTTTCTCC--TAAGTATAGC	cp9
T08TC024		Chrom	635408	Reverse	BB0608	Forward	634581	636011	0.579021	aminoacyl-histidine dipeptidase	pepD	TGTTCGTACT--TAAAGTTAAA	cp9,lp5
T08TC191		Chrom	635958	Forward	BB0608	Forward	634581	636011	0.962937	aminoacyl-histidine dipeptidase	pepD	TTCTTCAACT--ATTAGAGTTT	cp9,lp5		anomolous transposition event
T05TC454	same site: T05TC454, T06TC544	Chrom	641196	Reverse	BB0613	Forward	639808	642249	0.569029	ATP-dependent protease LA	lon-2	AGCAAAATTA--TAAGTTTATA		cp9
T06TC544	same site: T05TC454, T06TC544	Chrom	641196	Reverse	BB0613	Forward	639808	642249	0.569029	ATP-dependent protease LA	lon-2	AGCAAAATTA--TAAGTTTATA	Not done
T09TC072		Chrom	643917	Reverse	BB0616	Reverse	644650	643295	0.540221	conserved hypothetical integral membrane protein		GTCATGTTCA--TATATAGTAT	lp5
T10TC102		Chrom	644035	Reverse	BB0616	Reverse	644650	643295	0.453137	conserved hypothetical integral membrane protein		AATCCTGTCA--TAAGTATAAT	Complete
T07TC438		Chrom	644071	Reverse	BB0616	Reverse	644650	643295	0.426568	conserved hypothetical integral membrane protein		GCTATTAAGC--TTTCCATTAG	Not done		anomolous transposition event
T10TC326		Chrom	644294	Reverse	BB0616	Reverse	644650	643295	0.261993	conserved hypothetical integral membrane protein		CAAATTTATC--TTCTTCTATT	lp21		anomolous transposition event
T10P01D04	T10P01D04, T10P01E06, T10P01F01; same site T10TC498	Chrom	644656	Forward	IR BB0616-BB0617	0	644651	644771	0.0416667	Intergenic Region	0	ACCATAATTG--TAACATTCTC	Not done
T10P01E06	see T10P01D04	Chrom	644656	Forward	IR BB0616-BB0617	0	644651	644771	0.0416667	Intergenic Region	0	ACCATAATTG--TAACATTCTC	Not done
T10P01F01	see T10P01D04	Chrom	644656	Forward	IR BB0616-BB0617	0	644651	644771	0.0416667	Intergenic Region	0	ACCATAATTG--TAACATTCTC	Not done
T10TC498	see T10P01D04	Chrom	644656	Forward	IR BB0616-BB0617	0	644651	644771	0.0416667	Intergenic Region	0	ACCATAATTG--TAACATTCTC	Complete
T03TC288		Chrom	644945	Forward	BB0617	Forward	644772	645140	0.470109	conserved hypothetical protein		ATGATATTAA--TAATAGTTTA	lp21,lp5
T05TC475		Chrom	645074	Reverse	BB0617	Forward	644772	645140	0.82337	conserved hypothetical protein		TATCTGCTCA--TACTCTTGAA	Complete
T08TC514		Chrom	645325	Reverse	BB0618	Reverse	645601	645137	0.592672	cytidine deaminase	cdd	TGCAGGCATA--TAGCGCACGG	Complete
T11TC503		Chrom	645400	Forward	BB0618	Reverse	645601	645137	0.43319	cytidine deaminase	cdd	TTTGCAATCA--TATTTAAAAT	cp9, lp5
T04TC012		Chrom	646673	Reverse	BB0620	Reverse	648326	646659	0.991002	beta-glucosidase, putative		GGATAATATT--TATTTATAAT	lp28-1,lp5
T08TC075		Chrom	646981	Reverse	BB0620	Reverse	648326	646659	0.806239	beta-glucosidase, putative		TAAGGGATAA--TAGTTGTAAT	Complete
T07TC252		Chrom	646987	Reverse	BB0620	Reverse	648326	646659	0.802639	beta-glucosidase, putative		ATAATAGTTG--TAATAATAAG	lp5
T10TC126		Chrom	647057	Reverse	BB0620	Reverse	648326	646659	0.760648	beta-glucosidase, putative		GGAGATATTA--TAAGTGTTTT	lp5
T08TC124		Chrom	647249	Reverse	BB0620	Reverse	648326	646659	0.645471	beta-glucosidase, putative		ATTCTTTTAT--TAGATTCAAT	cp9
T03TC036		Chrom	647327	Reverse	BB0620	Reverse	648326	646659	0.59868	beta-glucosidase, putative		TTTTGTTGTA--TATTTTCATT	Complete
T11TC129		Chrom	647633	Forward	BB0620	Reverse	648326	646659	0.415717	beta-glucosidase, putative		TCTAGTAAAT--TAGAATTTAT	lp5
T06TC560		Chrom	647821	Forward	BB0620	Reverse	648326	646659	0.302939	beta-glucosidase, putative		TTCATGGCTG--TATATATCTA	Not done
T09TC075		Chrom	647825	Forward	BB0620	Reverse	648326	646659	0.30054	beta-glucosidase, putative		TGGCTGTATA--TATCTACTAT	Complete
T11TC341		Chrom	647884	Reverse	BB0620	Reverse	648326	646659	0.264547	beta-glucosidase, putative		TTGTGCTATG--TAATATCCTG	Not done
T11TC346		Chrom	648177	Reverse	BB0620	Reverse	648326	646659	0.0887822	beta-glucosidase, putative		TTGGGTAGCT--TATCATGAAC	Not done
T09TC333		Chrom	648355	Reverse	IR BB0620-BB0621	0	648327	648552	0.128889	Intergenic Region	0	AATGCTAATT--TAGTAATTTA	Complete
T05TC615		Chrom	649064	Reverse	BB0621	Forward	648553	649107	0.924188	4-methyl-5(b-hydroxyethyl)-thiazole monophosphate biosynthesis protein	thiJ	GGAAAACAAA--TAATGGAAGA	lp28-1
T11TC105		Chrom	649135	Reverse	IR BB0621-BB0622	0	649108	649169	0.459016	Intergenic Region	0	ATGATTATAA--TAAATAAACC	lp5
T03TC035		Chrom	650584	Reverse	BB0623	Reverse	653790	650413	0.949067	transcription-repair coupling factor	mfd	GAATGCTTTC--TATATTTTTG	Complete
T07TC365		Chrom	651066	Reverse	BB0623	Reverse	653790	650413	0.806337	transcription-repair coupling factor	mfd	AATCTTTCAA--TAGAGCGTTC	Complete
T07TC508		Chrom	651118	Reverse	BB0623	Reverse	653790	650413	0.790939	transcription-repair coupling factor	mfd	AAGCATAAGC--TTTCTGAGAT	lp5		anomolous transposition event
T08TC033		Chrom	651235	Reverse	BB0623	Reverse	653790	650413	0.756293	transcription-repair coupling factor	mfd	CATTTTCAAT--TATTGTTGTT	lp5
T09TC332		Chrom	651286	Forward	BB0623	Reverse	653790	650413	0.741487	transcription-repair coupling factor	mfd	AATTGTGCAT--TATATTTTCA		lp5
T07TC088		Chrom	652078	Forward	BB0623	Reverse	653790	650413	0.506959	transcription-repair coupling factor	mfd	ACAACAATTG--TAATTCATTA	lp5
T05TC513		Chrom	652138	Forward	BB0623	Reverse	653790	650413	0.489192	transcription-repair coupling factor	mfd	AATAAAGTTC--TATTAATTTG	lp5
T05TC171		Chrom	652592	Reverse	BB0623	Reverse	653790	650413	0.354457	transcription-repair coupling factor	mfd	TTTGAAAATA--TATTTAAGTT	Complete
T10TC519		Chrom	657157	Forward	BB0626	Reverse	657543	656998	0.708257	small primase-like protein		AGTTTTCTCC--TATTATGCCA	Complete
T08TC662		Chrom	657291	Reverse	BB0626	Reverse	657543	656998	0.46055	small primase-like protein		TCTTTAGTAT--TAAGATATGC	Complete
T09TC251		Chrom	657296	Reverse	BB0626	Reverse	657543	656998	0.451376	small primase-like protein		AGTATTAAGA--TATGCATGTT	Complete
T11TC005		Chrom	658716	Reverse	BB0627	Reverse	658817	657546	0.0786782	vacuolar X-prolyl dipeptidyl aminopeptidase I	pepX	TAAAATAATT--TATTAATTTC	cp9,lp5
T04TC312		Chrom	659700	Reverse	BB0629	Reverse	661524	659644	0.969681	PTS system, fructose-specific IIABC component	fruA-2	ACAGCTGTTA--TAATAGATCC	lp28-1,lp5
T10TC390		Chrom	659836	Forward	BB0629	Reverse	661524	659644	0.897872	PTS system, fructose-specific IIABC component	fruA-2	ATGAGCCTAG--TATACATGCG	lp5
T10TC009		Chrom	659838	Forward	BB0629	Reverse	661524	659644	0.896809	PTS system, fructose-specific IIABC component	fruA-2	GAGCCTAGTA--TACATGCGGG		lp5
T07TC295		Chrom	660150	Reverse	BB0629	Reverse	661524	659644	0.730319	PTS system, fructose-specific IIABC component	fruA-2	ATTGCCATAT--TAGTACCGCT	lp5
T06TC053		Chrom	660192	Reverse	BB0629	Reverse	661524	659644	0.707979	PTS system, fructose-specific IIABC component	fruA-2	ATTGATTCAT--TAATAACAGA	Complete
T05TC436		Chrom	660210	Forward	BB0629	Reverse	661524	659644	0.698936	PTS system, fructose-specific IIABC component	fruA-2	GATATTGGAC--TAAGCATTCC	cp9
T08TC431		Chrom	660348	Forward	BB0629	Reverse	661524	659644	0.625532	PTS system, fructose-specific IIABC component	fruA-2	TAGCCTGAAA--TAAATCCTGC	cp9
T11P01D12	T11P01D12, T11P02A09	Chrom	661152	Reverse	BB0629	Reverse	659644	661524	0.197872	PTS system, fructose-specific IIABC component	fruA-2	CTAAAAGTAT--TACTTAGGTA	Not done
T11P02A09	T11P01D12, T11P02A09	Chrom	661152	Reverse	BB0629	Reverse	661524	659644	0.19734	PTS system, fructose-specific IIABC component	fruA-2	CTAAAAGTAT--TACTTAGGTA	Complete
T05TC025		Chrom	661156	Reverse	BB0629	Reverse	661524	659644	0.195213	PTS system, fructose-specific IIABC component	fruA-2	AAGTATTACT--TAGGTATGAT	Complete
T09TC063		Chrom	661544	Reverse	IR BB0629-BB0630	0	661525	661605	0.25	Intergenic Region	0	TTATATAGTG--TATATACATT	lp28-2,lp5
T09TC250		Chrom	661801	Reverse	BB0630	Forward	661606	662529	0.212351	1-phosphofructokinase	fruK	TACGGGTGAT--TATATAAGAT	cp9,lp5
T09TC094		Chrom	662375	Reverse	BB0630	Forward	661606	662529	0.834236	1-phosphofructokinase	fruK	GCCGGGTTTG--TATATGCTTT	cp9,lp5
T10TC080		Chrom	662571	Forward	IR BB0630-BB0631	0	662530	662602	0.569444	Intergenic Region	0	AAACTTTACT--GTAGCTTTTA		lp5	anomolous transposition event
T11TC377		Chrom	662586	Forward	IR BB0630-BB0631	0	662530	662602	0.777778	Intergenic Region	0	TTTTAAAAGC--TACAGTATTT	Not done
T08P01B02	T08P01B02, T08P02A03	Chrom	662623	Reverse	BB0631	Reverse	662917	662603	0.933121	conserved hypothetical protein		AATTTTGATT--TATATAATTT	cp32-6, cp9, lp21, lp28-1
T08P02A03	T08P01B02, T08P02A03	Chrom	662623	Reverse	BB0631	Reverse	662917	662603	0.933121	conserved hypothetical protein		AATTTTGATT--TATATAATTT	Not done
T04TC459		Chrom	662959	Forward	IR BB0631-BB0632	0	662918	663178	0.157692	Intergenic Region	0	TTATTTAAAT--TATAACCTTT	Complete
T03TC193		Chrom	663766	Reverse	BB0632	Reverse	665011	663179	0.679039	exodeoxyribonuclease V, alpha chain	recD	AAATTGTTTG--TATATTCTAT	Not done
T04TC028		Chrom	674841	Reverse	IR BB0636-BB0637	0	674779	675028	0.253012	Intergenic Region	0	TTATATAATT--TATTCCTATC	lp5
T04TC415		Chrom	675844	Forward	BB0637	Forward	675029	676378	0.604151	Na+/H+ antiporter	nhaC-1	CTATATGTCT--TATTAGCGTT		lp5
T06TC391	same site: T06TC391, T07TC315	Chrom	676105	Forward	BB0637	Forward	675029	676378	0.797628	Na+/H+ antiporter	nhaC-1	TTGCCATACT--TATTTGCGGC	Not done
T07TC315	same site: T06TC391, T07TC315	Chrom	676105	Reverse	BB0637	Forward	675029	676378	0.798369	Na+/H+ antiporter	nhaC-1	TTGCCATACT--TATTTGCGGC		lp17
T05TC275		Chrom	676806	Reverse	BB0638	Forward	676472	677860	0.241354	Na+/H+ antiporter	nhaC-2	GTTGATGCTG--TAGTAAATAT	lp5
T03TC062		Chrom	676848	Reverse	BB0638	Forward	676472	677860	0.271614	Na+/H+ antiporter	nhaC-2	AATTTAATAG--TATGTGGCAT	Complete
T05TC194		Chrom	677157	Forward	BB0638	Forward	676472	677860	0.493516	Na+/H+ antiporter	nhaC-2	GGTTCTTATT--ATTGCAAGGT	Complete		anomolous transposition event
T03TC122		Chrom	677230	Reverse	BB0638	Forward	676472	677860	0.54683	Na+/H+ antiporter	nhaC-2	ATATTTTTGT--TATGGTTTTT	cp9
T11TC428		Chrom	677586	Forward	BB0638	Forward	676472	677860	0.802594	Na+/H+ antiporter	nhaC-2	GTAAGATCAA--TAACTAAGGA	Not done
T05TC495		Chrom	677685	Reverse	BB0638	Forward	676472	677860	0.87464	Na+/H+ antiporter	nhaC-2	ATGCATGTTA--TAGCTCTTGT	lp5
T06TC343		Chrom	677797	Reverse	BB0638	Forward	676472	677860	0.955331	Na+/H+ antiporter	nhaC-2	TTGGACTTGA--TATTAAGTTA	cp32-7,cp9,lp5
T10TC291		Chrom	684111	Forward	BB0645	Forward	683423	684967	0.445596	PTS system, glucose-specific IIBC component	ptsG	CTTCATCATA--TATTTTATTT	lp28-2,lp5
T09TC107		Chrom	684634	Reverse	BB0645	Forward	683423	684967	0.784974	PTS system, glucose-specific IIBC component	ptsG	ACTTTACTTT--TATATTTTTA	lp38,lp5
T06TC515		Chrom	684981	Reverse	IR BB0645-BB0646	0	684968	684996	0.5	Intergenic Region	0	TTTTAATAAG--TAATAGCTTA	Not done
T04TC171		Chrom	684984	Reverse	IR BB0645-BB0646	0	684968	684996	0.607143	Intergenic Region	0	TAATAAGTAA--TAGCTTAAGG		lp5
T04TC389		Chrom	688391	Forward	IR BB0648-BB0649	0	688296	688489	0.492228	Intergenic Region	0	TTTTGATGCA--TAGAAGTAAT	lp28-1, lp5
T08TC019		Chrom	694711	Reverse	BB0655	Reverse	695523	694693	0.977108	heat shock protein	dnaJ-2	ATATCTCTTT--TAATCTTTCG	lp28-1,lp5
T07TC071		Chrom	695475	Forward	BB0655	Reverse	695523	694693	0.0578313	heat shock protein	dnaJ-2	ATTTCCTCAT--TACTAGCATT	cp32-3,lp5
T08TC063		Chrom	695500	Forward	BB0655	Reverse	695523	694693	0.0277108	heat shock protein	dnaJ-2	GTATTCCAAG--TATATTGTAG	lp5
T08P01B05	T08P01B05, T08P01C06, T08P01C08, T08P01F09, T08P02B02	Chrom	695507	Forward	BB0655	Reverse	695523	694693	0.0192771	heat shock protein	dnaJ-2	AAGTATATTG--TAGTAGTCTT	Not done
T08P01C06	see T08P01B05	Chrom	695507	Forward	BB0655	Reverse	695523	694693	0.0192771	heat shock protein	dnaJ-2	AAGTATATTG--TAGTAGTCTT	cp9	lp5
T08P01C08	see T08P01B05	Chrom	695507	Forward	BB0655	Reverse	695523	694693	0.0192771	heat shock protein	dnaJ-2	AAGTATATTG--TAGTAGTCTT	Not done
T08P01F09	see T08P01B05	Chrom	695507	Forward	BB0655	Reverse	695523	694693	0.0192771	heat shock protein	dnaJ-2	AAGTATATTG--TAGTAGTCTT	Not done
T08P02B02	see T08P01B05	Chrom	695507	Forward	BB0655	Reverse	695523	694693	0.0192771	heat shock protein	dnaJ-2	AAGTATATTG--TAGTAGTCTT	Not done
T04TC366		Chrom	695783	Reverse	BB0656	Forward	695631	696764	0.13504	oxygen-independent coproporphyrinogen III oxidase, putative		CACTTTACAT--TAAGCACGTA	Complete
T05TC505		Chrom	696472	Forward	BB0656	Forward	695631	696764	0.742277	oxygen-independent coproporphyrinogen III oxidase, putative		AATAATCACT--TAGTAACGTT	cp32-7,lp5
T08TC335		Chrom	702261	Reverse	BB0663	Forward	701825	702274	0.973274	conserved hypothetical protein		GTTAATTCTT--TATTAGTAGA	lp5
T07TC264		Chrom	703701	Forward	BB0665	Forward	703009	703968	0.721585	conserved hypothetical protein		GAATCCAGTA--TACTGCATTA		lp28-3,lp17,lp5
T06TC135		Chrom	705809	Forward	BB0668	Forward	705571	706605	0.230174	flagellar filament outer layer protein	flaA	GATATGGTTG--TAGATCTTGG	lp21
T10TC330		Chrom	707346	Forward	BB0669	Forward	706673	709267	0.259445	chemotaxis histidine kinase	cheA-2	TATTATCTGA--TATATTCAGA	lp5
T05TC021		Chrom	707720	Forward	BB0669	Forward	706673	709267	0.403624	chemotaxis histidine kinase	cheA-2	TTTTGTAATA--TATTACTTAA	lp21
T09TC222		Chrom	708417	Forward	BB0669	Forward	706673	709267	0.672321	chemotaxis histidine kinase	cheA-2	AAGTCTGTTA--TAGATGACCT	lp21,lp5	cp9
T11P01C01	T11P01C01, T11P01C06	Chrom	710035	Reverse	BB0670	Forward	709274	710674	0.544286	purine-binding chemotaxis protein	cheW-3	TAAAATTTAA--TATGGTTGAT	Not done
T11P01C06	T11P01C01, T11P01C06	Chrom	710035	Reverse	BB0670	Forward	709274	710674	0.544286	purine-binding chemotaxis protein	cheW-3	TAAAATTTAA--TATGGTTGAT	lp21,lp5
T06TC501		Chrom	710275	Forward	BB0670	Forward	709274	710674	0.715	purine-binding chemotaxis protein	cheW-3	TAAAACCTTT--TAAGTTGACG	Not done
T09TC389		Chrom	710424	Reverse	BB0670	Forward	709274	710674	0.822143	purine-binding chemotaxis protein	cheW-3	TCAGAAATCC--TAAGTAATGT	lp38	lp5
T04TC419		Chrom	710566	Forward	BB0670	Forward	709274	710674	0.922857	purine-binding chemotaxis protein	cheW-3	CTTCCAAAGC--TATTAAAGGG	lp5
T10TC510		Chrom	710822	Forward	BB0671	Forward	710686	711171	0.280412	chemotaxis operon protein	cheX	GTTTCTGTAA--TAGTAGGGCT	lp5
T11TC295		Chrom	710855	Forward	BB0671	Forward	710686	711171	0.348454	chemotaxis operon protein	cheX	GAGGGCAGTA--TAATTATTGA	Complete
T10TC076		Chrom	710873	Reverse	BB0671	Forward	710686	711171	0.387629	chemotaxis operon protein	cheX	GATATGGACA--TAGAAACAGC		lp5
T08TC293		Chrom	710917	Reverse	BB0671	Forward	710686	711171	0.478351	chemotaxis operon protein	cheX	TTTTGAAGAG--TATGATGATT	cp32-6,lp21,lp5
T09TC433		Chrom	711003	Reverse	BB0671	Forward	710686	711171	0.65567	chemotaxis operon protein	cheX	GAAATTTTGT--TACCACTTTG	lp5
T10TC346		Chrom	711054	Forward	BB0671	Forward	710686	711171	0.758763	chemotaxis operon protein	cheX	CCCCAGCTTT--TATTTATGGA	lp5
T09TC397		Chrom	711077	Forward	BB0671	Forward	710686	711171	0.806186	chemotaxis operon protein	cheX	AATATGAAAA--TAAGTAATAA		lp5
T10TC219		Chrom	712575	Reverse	BB0674	Reverse	713250	712204	0.644359	membrane protein, putative		TCTATTACTC--TATATTCACT	cp32-6,lp28-2,lp5
T08TC030		Chrom	713026	Forward	BB0674	Reverse	713250	712204	0.214149	membrane protein, putative		TATCGAAGAA--TAGATTGTTT	Complete
T08TC180		Chrom	713131	Reverse	BB0674	Reverse	713250	712204	0.112811	membrane protein, putative		ACCCAAGAAA--TATTAGTGCA	cp9,lp5
T11TC268		Chrom	713607	Reverse	BB0675	Reverse	714107	713244	0.578216	conserved hypothetical protein; appears to be in operon with BB_0676, phosphoglycolate phosphatase		TTAAGAGAAG--TAGTATCTTT	Complete
T10P01C09	T10P01C09, T10P01C10, T10P01H06	Chrom	713798	Forward	BB0675	Reverse	714107	713244	0.358053	conserved hypothetical protein; appears to be in operon with BB_0676, phosphoglycolate phosphatase		TTGACAAAGT--TAAATATCAA	cp9, lp5
T10P01C10	see T10P01C09	Chrom	713798	Forward	BB0675	Reverse	714107	713244	0.358053	conserved hypothetical protein; appears to be in operon with BB_0676, phosphoglycolate phosphatase		TTGACAAAGT--TAAATATCAA	Not done
T10P01H06	see T10P01C09	Chrom	713798	Forward	BB0675	Reverse	714107	713244	0.358053	conserved hypothetical protein; appears to be in operon with BB_0676, phosphoglycolate phosphatase		TTGACAAAGT--TAAATATCAA	Not done
T10TC158	T10TC158, T10TC186	Chrom	713906	Forward	BB0675	Reverse	714107	713244	0.232908	conserved hypothetical protein; appears to be in operon with BB_0676, phosphoglycolate phosphatase		GTAATCATTA--TATCTGTTTT		lp5
T10TC186	see T10TC158	Chrom	713906	Forward	BB0675	Reverse	714107	713244	0.232908	conserved hypothetical protein; appears to be in operon with BB_0676, phosphoglycolate phosphatase		GTAATCATTA--TATCTGTTTT	lp5
T06TC308	same site: T06TC308, T08TC523	Chrom	713934	Forward	BB0675	Reverse	714107	713244	0.200463	conserved hypothetical protein; appears to be in operon with BB_0676, phosphoglycolate phosphatase		CGTATTGAAT--TAGGTCTTTT	lp5
T08TC523	same site: T06TC308, T08TC523	Chrom	713934	Reverse	BB0675	Reverse	714107	713244	0.199305	conserved hypothetical protein; appears to be in operon with BB_0676, phosphoglycolate phosphatase		CGTATTGAAT--TAGGTCTTTT	lp5
T06TC425		Chrom	714140	Reverse	BB0676	Reverse	714766	714104	0.944109	phosphoglycolate phosphatase	gph	GTGGATTGTG--TATTATATGT	Not done
T11TC440		Chrom	714143	Reverse	BB0676	Reverse	714766	714104	0.939577	phosphoglycolate phosphatase	gph	GATTGTGTAT--TATATGTTTT	Not done
T05TC488		Chrom	714184	Reverse	BB0676	Reverse	714766	714104	0.877644	phosphoglycolate phosphatase	gph	TGAACACTTC--TAAATCCCCA	lp5
T08P01B03	T08P01B03, T08P01D02, T08P01F01	Chrom	714259	Reverse	BB0676	Reverse	714766	714104	0.76435	phosphoglycolate phosphatase	gph	CTGTCTCCAA--TATATGCAAT	Not done
T08P01D02	see T08P01B03	Chrom	714259	Reverse	BB0676	Reverse	714766	714104	0.76435	phosphoglycolate phosphatase	gph	CTGTCTCCAA--TATATGCAAT	lp5
T08P01F01	see T08P01B03	Chrom	714259	Reverse	BB0676	Reverse	714766	714104	0.76435	phosphoglycolate phosphatase	gph	CTGTCTCCAA--TATATGCAAT	Not done
T07TC199		Chrom	718677	Reverse	IR BB0679-BB0680	0	718670	718826	0.0512821	Intergenic Region	0	TAGCAGTTAA--TAATAATAGT	lp5	lp28-1
T09TC506		Chrom	718798	Reverse	IR BB0679-BB0680	0	718670	718826	0.826923	Intergenic Region	0	TTTGATTAAA--TAAGTAGGTG		lp5
T11TC260		Chrom	718823	Forward	IR BB0679-BB0680	0	718670	718826	0.980769	Intergenic Region	0	TGAGGTAGTT--TATTATGTTA		lp5
T07TC173		Chrom	718826	Reverse	BB0680	Forward	718827	721088	0	methyl-accepting chemotaxis protein	mcp4	GGTAGTTTAT--TATGTTATTG	lp5
T09P01C06		Chrom	718941	Forward	BB0680	Forward	718827	721088	0.0504202	methyl-accepting chemotaxis protein	mcp4	TTTAGAAGAT--TATTATAAGC	lp21,lp5
T11P01C12	T11P01C12, T11P01H01	Chrom	718944	Reverse	BB0680	Forward	718827	721088	0.0521893	methyl-accepting chemotaxis protein	mcp4	AGAAGATTAT--TATAAGCAGC	Not done
T11P01H01	T11P01C12, T11P01H01	Chrom	718944	Reverse	BB0680	Forward	718827	721088	0.0521893	methyl-accepting chemotaxis protein	mcp4	AGAAGATTAT--TATAAGCAGC	lp5
T05TC145		Chrom	719181	Reverse	BB0680	Forward	718827	721088	0.15701	methyl-accepting chemotaxis protein	mcp4	ATATCGACAA--TACTTATACA	Complete
T08TC695		Chrom	719420	Forward	BB0680	Forward	718827	721088	0.262273	methyl-accepting chemotaxis protein	mcp4	AAGTTGCTAT--TAGGTCTAAA	lp5
T10TC507		Chrom	719461	Forward	BB0680	Forward	718827	721088	0.280407	methyl-accepting chemotaxis protein	mcp4	GCAATAATTG--TACCTGTATA		lp5
T10TC021		Chrom	719467	Forward	BB0680	Forward	718827	721088	0.283061	methyl-accepting chemotaxis protein	mcp4	ATTGTACCTG--TATATTCCCC	lp38	lp5
T06TC476	see T11P01A11	Chrom	719746	Forward	BB0680	Forward	718827	721088	0.406457	methyl-accepting chemotaxis protein	mcp4	ATTGATAGAA--TACTTTTGTC	Not done
T11P01A11	T11P01A11, T11P02A12, T11P02B01; same site T06TC476	Chrom	719746	Forward	BB0680	Forward	718827	721088	0.406457	methyl-accepting chemotaxis protein	mcp4	ATTGATAGAA--TACTTTTGTC	Complete
T11P02A12	see T11P01A11	Chrom	719746	Forward	BB0680	Forward	718827	721088	0.406457	methyl-accepting chemotaxis protein	mcp4	ATTGATAGAA--TACTTTTGTC	Not done
T11P02B01	see T11P01A11	Chrom	719746	Forward	BB0680	Forward	718827	721088	0.406457	methyl-accepting chemotaxis protein	mcp4	ATTGATAGAA--TACTTTTGTC	Not done
T06TC601		Chrom	719920	Reverse	BB0680	Forward	718827	721088	0.483857	methyl-accepting chemotaxis protein	mcp4	ATTATAGCAT--TAAGTATTGT	Not done
T06TC480		Chrom	720013	Forward	BB0680	Forward	718827	721088	0.524547	methyl-accepting chemotaxis protein	mcp4	AAGGGCAATT--TAGATAAAGA	Not done
T11TC089		Chrom	720236	Reverse	BB0680	Forward	718827	721088	0.623618	methyl-accepting chemotaxis protein	mcp4	AAATGTCAGC--TAATGTTGAG	Complete
T07TC209		Chrom	720365	Reverse	BB0680	Forward	718827	721088	0.680672	methyl-accepting chemotaxis protein	mcp4	CTGTTATTGC--TATGCAAGAC	cp32-6
T08TC048		Chrom	720563	Reverse	BB0680	Forward	718827	721088	0.768244	methyl-accepting chemotaxis protein	mcp4	TAGTTGAAGA--TAACTCTAAG	lp5
T08P01B04	T08P01B04, T08P02F03	Chrom	721277	Forward	BB0681	Forward	721110	723020	0.0874346	methyl-accepting chemotaxis protein	mcp5	AAAGTTCTTT--TAATCTTTAC	Not done
T08P02F03	T08P01B04, T08P02F03	Chrom	721277	Forward	BB0681	Forward	721110	723020	0.0874346	methyl-accepting chemotaxis protein	mcp5	AAAGTTCTTT--TAATCTTTAC	Not done
T08TC314		Chrom	721466	Reverse	BB0681	Forward	721110	723020	0.186911	methyl-accepting chemotaxis protein	mcp5	AAATAGTGTT--TACTACGGCG	lp5
T09TC431		Chrom	721663	Reverse	BB0681	Forward	721110	723020	0.290052	methyl-accepting chemotaxis protein	mcp5	TACATATTAA--TAGGTATGCC	Complete
T11P01E05	T11P01E05, T11TC419	Chrom	721740	Reverse	BB0681	Forward	721110	723020	0.330366	methyl-accepting chemotaxis protein	mcp5	GGATTATATA--TATAGGTCTT	Not done
T11TC419	T11P01E05, T11TC419	Chrom	721740	Forward	BB0681	Forward	721110	723020	0.329843	methyl-accepting chemotaxis protein	mcp5	GGATTATATA--TATAGGTCTT	Not done
T07TC386		Chrom	721831	Reverse	BB0681	Forward	721110	723020	0.37801	methyl-accepting chemotaxis protein	mcp5	GTTCATCATG--TAGTATTGCC	lp5
T11TC367		Chrom	722077	Forward	BB0681	Forward	721110	723020	0.506283	methyl-accepting chemotaxis protein	mcp5	GCTACAACTA--TAATCTTAGC	Not done
T11TC484		Chrom	722250	Reverse	BB0681	Forward	721110	723020	0.597382	methyl-accepting chemotaxis protein	mcp5	TGTAGAGCTT--TACAGTTTGT	Not done
T08P01C10	T08P01C10, T08P01D01, T08P01D07, T08P01E04, T08P01E11, T08P01H10	Chrom	722495	Forward	BB0681	Forward	721110	723020	0.725131	methyl-accepting chemotaxis protein	mcp5	AAATTGCTGT--TAATACTAAT	Not done
T08P01D01	see T08P01C10	Chrom	722495	Forward	BB0681	Forward	721110	723020	0.725131	methyl-accepting chemotaxis protein	mcp5	AAATTGCTGT--TAATACTAAT	Not done
T08P01D07	see T08P01C10	Chrom	722495	Forward	BB0681	Forward	721110	723020	0.725131	methyl-accepting chemotaxis protein	mcp5	AAATTGCTGT--TAATACTAAT	Not done
T08P01E04	see T08P01C10	Chrom	722495	Forward	BB0681	Forward	721110	723020	0.725131	methyl-accepting chemotaxis protein	mcp5	AAATTGCTGT--TAATACTAAT	Not done
T08P01E11	see T08P01C10	Chrom	722495	Forward	BB0681	Forward	721110	723020	0.725131	methyl-accepting chemotaxis protein	mcp5	AAATTGCTGT--TAATACTAAT	Not done
T08P01H10	see T08P01C10	Chrom	722495	Forward	BB0681	Forward	721110	723020	0.725131	methyl-accepting chemotaxis protein	mcp5	AAATTGCTGT--TAATACTAAT	Not done
T08TC209		Chrom	722755	Forward	BB0681	Forward	721110	723020	0.861257	methyl-accepting chemotaxis protein	mcp5	AACAGAAGTT--TAACTGTTGC	Complete
T06TC547		Chrom	730665	Reverse	BB0689	Reverse	731099	730632	0.927195	lipoprotein, putative		CAAAAAGAAC--TACAAATATA	lp28-1, lp5
T06TC535		Chrom	742715	Forward	BB0707	Forward	742690	744516	0.0136911	conserved hypothetical protein		AGTAGTACTT--TATTTTTTAA	Not done
T03TC244		Chrom	742958	Forward	BB0707	Forward	742690	744516	0.146769	conserved hypothetical protein		AGAATGTGGT--TAACTATTTT	Complete
T11TC499		Chrom	743652	Forward	BB0707	Forward	742690	744516	0.526835	conserved hypothetical protein		ATGATATTAG--TAATTCAGAG	Not done
T06TC232		Chrom	743698	Forward	BB0707	Forward	742690	744516	0.552026	conserved hypothetical protein		TCGGGTAGAA--TATGTATTTA	lp5
T07TC185		Chrom	743952	Forward	BB0707	Forward	742690	744516	0.691128	conserved hypothetical protein		TTAGAGATCC--TAGTTTAATT	Complete
T11TC183		Chrom	744131	Forward	BB0707	Forward	742690	744516	0.789157	conserved hypothetical protein		TTGAGAAATA--TATATGTTGA	lp5
T10TC213		Chrom	744425	Reverse	BB0707	Forward	742690	744516	0.950712	conserved hypothetical protein		AAATCAATGG--TAACTGAAAA	cp9
T07P01B06		Chrom	744879	Reverse	IR BB0708-BB0709	0	744846	745301	0.0747253	Intergenic Region	0	TATTTATCAT--TATTCTATTG	lp38,lp5
T06TC415		Chrom	760801	Reverse	BB0722	Forward	760202	761647	0.415225	conserved hypothetical protein		TTAATAGAAA--TATTACTAAT	lp21, lp5
T11TC309		Chrom	760939	Reverse	BB0722	Forward	760202	761647	0.510727	conserved hypothetical protein		GGATTGATAT--TAGTCCTGGT	Not done
T10TC545		Chrom	761435	Reverse	BB0722	Forward	760202	761647	0.853979	conserved hypothetical protein		CATTGGGCTT--TATAAAAATA		lp5
T04TC175		Chrom	761542	Forward	BB0722	Forward	760202	761647	0.927336	conserved hypothetical protein		ATTTTAAGAG--TAATGTTAAA		cp9
T08TC498		Chrom	761661	Forward	BB0723	Reverse	762154	761621	0.924953	adenylyl cyclase, CyaB-type, putative		TAATTCAGAG--TAAGGTCTAG	lp5	lp38
T11TC373		Chrom	762143	Forward	BB0723	Reverse	762154	761621	0.0206379	adenylyl cyclase, CyaB-type, putative		CTTTTGATTC--TATTTCAAAC	cp32-4
T07TC229		Chrom	762154	Reverse	IR BB0723-BB0724	0	762155	762241	0	Intergenic Region	0	ATTTCAAACA--TATATTAAAA	Complete
T03TC112	same site: T03TC112, T08TC383	Chrom	764507	Forward	BB0726	Forward	764371	765342	0.140062	minD-related ATP-binding protein	ylxH-3	GGCTCTAATC--TACATACGTG	Complete
T08TC383	same site: T03TC112, T08TC383	Chrom	764507	Reverse	BB0726	Forward	764371	765342	0.141092	minD-related ATP-binding protein	ylxH-3	GGCTCTAATC--TACATACGTG	Complete
T10TC456		Chrom	765283	Forward	BB0726	Forward	764371	765342	0.939238	minD-related ATP-binding protein	ylxH-3	AGGGTCTCCT--TATATTTACG	Complete
T03TC333		Chrom	768111	Forward	BB0729	Reverse	769470	768079	0.976995	glutamate transporter	gltP	TGGTTGTATA--TATTATGGTT	cp32-6,lp5
T08TC345		Chrom	768516	Reverse	BB0729	Reverse	769470	768079	0.685119	glutamate transporter	gltP	ATTTCTATAT--TAATGGGTAT	Complete
T04TC122		Chrom	769400	Reverse	BB0729	Reverse	769470	768079	0.0496046	glutamate transporter	gltP	TTTACAAAGA--TAAACTATGC	lp28-1,lp5
T09TC447		Chrom	769586	Reverse	BB0730	Reverse	771145	769547	0.974969	glucose-6-phosphate isomerase	pgi	AAGATTCTAT--TACTTCATCT	lp5
T08TC240		Chrom	771416	Reverse	BB0731	Reverse	771563	771162	0.36409	conserved hypothetical protein		TGATATCTTC--TAAGTCCTGC	lp5
T06TC046		Chrom	774573	Reverse	IR BB0732-BB0733	0	774369	774631	0.782443	Intergenic Region	0	AGCGTGTTTA--TAGCTTAATT		lp28-1
T11P01A09	T11P01A09, T11P01B11, T11P01E01, T11P01F11, T11P01H10	Chrom	775396		BB0733	Forward	774632	775462	0.920482	conserved hypothetical protein		TTGCGCTTGG--TATTGCTTTT	lp5
T11P01B11	see T11P01A09	Chrom	775396	Forward	BB0733	Forward	774632	775462	0.920482	conserved hypothetical protein		TTGCGCTTGG--TATTGCTTTT	Not done
T11P01E01	see T11P01A09	Chrom	775396	Forward	BB0733	Forward	774632	775462	0.920482	conserved hypothetical protein		TTGCGCTTGG--TATTGCTTTT	lp5
T11P01F11	see T11P01A09	Chrom	775396	Forward	BB0733	Forward	774632	775462	0.920482	conserved hypothetical protein		TTGCGCTTGG--TATTGCTTTT	Not done
T11P01H10	see T11P01A09	Chrom	775396	Forward	BB0733	Forward	774632	775462	0.920482	conserved hypothetical protein		TTGCGCTTGG--TATTGCTTTT	Not done
T07TC028		Chrom	777185	Forward	BB0735	Forward	776746	777573	0.530834	rare lipoprotein A	rlpA	AGACCTTCTG--TATCAAAATC	Complete
T06TC246		Chrom	781571	Forward	BB0739	Reverse	782073	781486	0.855196	conserved hypothetical protein		TTCTTTGATG--TAAATTGATG	lp5
T08TC067		Chrom	781797	Reverse	BB0739	Reverse	782073	781486	0.468484	conserved hypothetical protein		TTGATTATAT--TACTAGTATT	Complete
T05TC430		Chrom	781884	Reverse	BB0739	Reverse	782073	781486	0.320273	conserved hypothetical protein		TCGTGATCTT--TAATGTATGG	lp5
T07TC343		Chrom	781972	Reverse	BB0739	Reverse	782073	781486	0.170358	conserved hypothetical protein		TTTTTATTAG--TATATCTTGT	Complete
T11TC509		Chrom	782352	Reverse	BB0740	Reverse	782829	782152	0.703102	conserved hypothetical protein		TTTTTGGGAT--TAAATCCGTC	Not done
T07TC410		Chrom	782500	Reverse	BB0740	Reverse	782829	782152	0.48449	conserved hypothetical protein		TTTTCAACAT--TAATTTAAAA	Complete
T11TC378		Chrom	782795	Reverse	BB0740	Reverse	782829	782152	0.0487445	conserved hypothetical protein		TTTGCTTGAA--TATATGGTAT	Not done
T11P01H09		Chrom	782802	Forward	BB0740	Reverse	782829	782152	0.0398818	conserved hypothetical protein		GAATATATGG--TATTTTCTTT	cp9
T04TC409		Chrom	782907	Forward	IR BB0740-BB0741	0	782830	782975	0.531034	Intergenic Region	0	AATAAGTTTT--TATGTATAAA	lp5	lp38
T06TC113	same site: T06TC113, T10TC258	Chrom	782935	Forward	IR BB0740-BB0741	0	782830	782975	0.724138	Intergenic Region	0	TTTTATTAAA--TATTTAATAA	lp5
T10TC258	same site: T06TC113, T10TC258	Chrom	782935	Forward	IR BB0740-BB0741	0	782830	782975	0.724138	Intergenic Region	0	TTTTATTAAA--TATTTAATAA	lp5	cp9
T05TC553		Chrom	784934	Reverse	BB0742	Forward	783324	785021	0.949322	ABC transporter, ATP-binding protein		TTGATCGATA--TATGACTTTT	lp5
T03TC217		Chrom	785649	Forward	BB0743	Forward	785057	786754	0.348851	conserved hypothetical protein		TTGTTAATGA--TAAATACAAA	lp28-2
T06TC506		Chrom	785893	Reverse	BB0743	Forward	785057	786754	0.493223	conserved hypothetical protein		TTCTTTATAA--TAATAGAAAT	Not done
T06TC409		Chrom	786118	Reverse	BB0743	Forward	785057	786754	0.62581	conserved hypothetical protein		GTAATAAATA--TAATCAAGGC	Not done
T03TC141		Chrom	786196	Forward	BB0743	Forward	785057	786754	0.671184	conserved hypothetical protein		AAGAGATCCT--TAATTCTAAT	lp5
T04TC432		Chrom	786451	Reverse	BB0743	Forward	785057	786754	0.822039	conserved hypothetical protein		ATATTAATAA--TATAATTACC	cp32-6,lp5
T04TC154	T04TC154, T04TC161	Chrom	786521	Reverse	BB0743	Forward	785057	786754	0.863288	conserved hypothetical protein		TATATACAAT--TACATCCAAA	cp32-3,lp5
T04TC161	T04TC154, T04TC161	Chrom	786521	Reverse	BB0743	Forward	785057	786754	0.863288	conserved hypothetical protein		TATATACAAT--TACATCCAAA	lp5
T10TC275		Chrom	787632	Forward	BB0744	Forward	786860	788962	0.367269	antigen, p83/100		GATTCCAATA--TAACAGAAAC	cp9,lp21,lp5
T06TC398		Chrom	787822	Forward	BB0744	Forward	786860	788962	0.457659	antigen, p83/100		TTCAAAGAAA--TACTGTTAGA	Not done
T04TC133		Chrom	787896	Forward	BB0744	Forward	786860	788962	0.492864	antigen, p83/100		CCTGGTGATG--TAAGTTCTCC		lp28-1
T06TC170	same site: T06TC170, T07TC323	Chrom	788464	Forward	BB0744	Forward	786860	788962	0.763083	antigen, p83/100		ATTTGACTAC--TATGTCTATA	lp5
T07TC323	same site: T06TC170, T07TC323	Chrom	788464	Forward	BB0744	Forward	786860	788962	0.763083	antigen, p83/100		ATTTGACTAC--TATGTCTATA	lp28-1,lp5
T09TC038		Chrom	788960	Reverse	BB0744	Forward	786860	788962	0.999524	antigen, p83/100		GAAAGTTAAG--TAACTTTACA	Complete
T06TC230		Chrom	789273	Reverse	BB0745	Forward	789270	789938	0.00598802	endonuclease III	nth	CTTTACTTTG--TATATTTTTT	lp5
T06TC345		Chrom	789650	Reverse	BB0745	Forward	789270	789938	0.570359	endonuclease III	nth	TTGATCTTAT--TAAGCTACCT	lp5
T11TC381		Chrom	789848	Forward	BB0745	Forward	789270	789938	0.865269	endonuclease III	nth	TTTCTATGGC--TATTAATAAG	Not done
T07TC288		Chrom	789851	Reverse	BB0745	Forward	789270	789938	0.871257	endonuclease III	nth	CTATGGCTAT--TAATAAGCAT		lp28-1,lp17,lp5
T03TC210		Chrom	793109	Reverse	BB0749	Forward	792333	793625	0.601393	conserved hypothetical protein		TTGTAGATAA--TAATAAACAA	lp5
T10TC221		Chrom	793359	Forward	BB0749	Forward	792333	793625	0.794118	conserved hypothetical protein		TGTTGCTAAT--TATGAAAAGC	cp9,lp5
T10TC474		Chrom	793388	Forward	BB0749	Forward	792333	793625	0.816563	conserved hypothetical protein		AAAGCATAAC--TAAGGACCCT	Complete
T10TC072		Chrom	793803	Reverse	BB0750	Forward	793693	793836	0.776224	hypothetical protein		TATTTATTTT--TATATGTTTT	lp5
T05TC412		Chrom	799153	Reverse	IR BB0755-BB0756	0	799017	799207	0.721053	Intergenic Region	0	TTTATGAATT--TAGAAATATT	lp5
T10TC411		Chrom	800064	Forward	BB0756	Reverse	800275	799208	0.197751	FAD dependent oxidoreductase, putative		AATTTCTTGA--TAGTAGTTTT	lp5
T08P01C03	T08P01C03, T08P01E09	Chrom	800131	Forward	BB0756	Reverse	800275	799208	0.134958	FAD dependent oxidoreductase, putative		CTACCCATAA--TAGGATTAAT	Not done
T08P01E09	T08P01C03, T08P01E09	Chrom	800131	Forward	BB0756	Reverse	800275	799208	0.134958	FAD dependent oxidoreductase, putative		CTACCCATAA--TAGGATTAAT	Not done
T04TC149		Chrom	801286	Reverse	BB0758	Forward	800996	801778	0.372123	conserved hypothetical protein		TTAGAGCTTT--TAAGAATGCT	cp32-3,lp28-2	lp5
T11TC331		Chrom	801802	Reverse	IR BB0758-BB0759	0	801779	801940	0.149068	Intergenic Region	0	TTTTCTTATT--TAACTTGACA	Not done
T11P01D02	T11P01D02, T11P01F07	Chrom	803239	Reverse	IR BB0760-BB0761	0	803213	803277	0.421875	Intergenic Region	0	TTATGTTTTT--TATTATATTT	Not done
T11P01F07	T11P01D02, T11P01F07	Chrom	803239	Reverse	IR BB0760-BB0761	0	803213	803277	0.421875	Intergenic Region	0	TTATGTTTTT--TATTATATTT	Not done
T07TC344		Chrom	803430	Reverse	BB0761	Forward	803278	804165	0.172492	conserved hypothetical protein		AAAAACAACA--TATTCCTCTG	cp9
T09TC399		Chrom	803876	Forward	BB0761	Forward	803278	804165	0.674183	conserved hypothetical protein		CATACAGGAA--TAGATCTTGC	Complete
T04TC203		Chrom	808494	Reverse	BB0767	Reverse	809552	808461	0.968836	undecaprenyldiphospho-muramoylpentapeptide beta-N-acetylglucosaminyltransferase	murG	TATCTTTTAT--TAGCAATTTG	cp9
T06TC577		Chrom	809626	Forward	IR BB0767-BB0768	0	809553	809700	0.496599	Intergenic Region	0	TTTAATAATA--TATTGCAATA	Not done
T11TC487		Chrom	812616	Forward	BB0771	Reverse	813239	812439	0.77875	RNA polymerase sigma factor	rpoS	TTGTTTCAAG--TATATAATTC	Not done
T11TC109		Chrom	812769	Forward	BB0771	Reverse	813239	812439	0.5875	RNA polymerase sigma factor	rpoS	GAATAATTTT--TATATACTGA	Complete
T06TC557		Chrom	813177	Reverse	BB0771	Reverse	813239	812439	0.07625	RNA polymerase sigma factor	rpoS	CGTGAGTAAT--TAGCTTGTGT	Not done
T07TC502		Chrom	813207	Forward	BB0771	Reverse	813239	812439	0.04	RNA polymerase sigma factor	rpoS	ATTTTAAATA--TATGTTTAAA	lp38
T11TC185		Chrom	813286	Reverse	IR BB0771-BB0772	0	813240	813689	0.104677	Intergenic Region	0	ATTAAGTTTT--TACTACTTAA	lp5	lp28-1
T06TC173		Chrom	813293	Reverse	IR BB0771-BB0772	0	813240	813689	0.120267	Intergenic Region	0	TTTTACTACT--TAATTTCCAT	Complete
T10TC459		Chrom	813782	Forward	BB0772	Reverse	814697	813690	0.90864	flagellar P-ring protein	flgI	ATTAATTCTT--TATTGCTAAG	Complete
T03TC042		Chrom	813788	Reverse	BB0772	Reverse	814697	813690	0.901688	flagellar P-ring protein	flgI	TCTTTATTGC--TAAGATTGTT	Complete
T06TC061		Chrom	814008	Reverse	BB0772	Reverse	814697	813690	0.683217	flagellar P-ring protein	flgI	CAATCTCTTC--TAATAGGCTT	lp5
T09P01H08	T09P01H08, T09P02B03	Chrom	814017	Reverse	BB0772	Reverse	814697	813690	0.67428	flagellar P-ring protein	flgI	CTAATAGGCT--TATGTTTTTT	cp32-7,cp9,lp5
T09P02B03	T09P01H08, T09P02B03	Chrom	814017	Reverse	BB0772	Reverse	814697	813690	0.67428	flagellar P-ring protein	flgI	CTAATAGGCT--TATGTTTTTT	Not done
T09TC368		Chrom	814086	Forward	BB0772	Reverse	814697	813690	0.606753	flagellar P-ring protein	flgI	TAGAGGTTAA--TATTTTATGA	Complete
T05TC352		Chrom	814173	Reverse	BB0772	Reverse	814697	813690	0.519364	flagellar P-ring protein	flgI	TCTCATTTAT--TATTACACTA	Complete
T06TC055	same site T06TC055, T11TC201	Chrom	814185	Reverse	BB0772	Reverse	814697	813690	0.507448	flagellar P-ring protein	flgI	TTACACTATC--TATAGTATAT	Complete
T11TC201	same site T06TC055, T11TC201	Chrom	814185	Forward	BB0772	Reverse	814697	813690	0.508441	flagellar P-ring protein	flgI	TTACACTATC--TATAGTATAT	Complete
T09TC059		Chrom	814460	Reverse	BB0772	Reverse	814697	813690	0.234359	flagellar P-ring protein	flgI	TCTAAAATTT--TAATTATAAG	Complete
T07TC290		Chrom	814530	Reverse	BB0772	Reverse	814697	813690	0.164846	flagellar P-ring protein	flgI	CAATACCTGT--TAAAAAATTT	lp5	lp17
T11TC450		Chrom	814552	Reverse	BB0772	Reverse	814697	813690	0.142999	flagellar P-ring protein	flgI	ATTTGTGGGA--TAAATATCCG	Not done
T10TC070		Chrom	814686	Forward	BB0772	Reverse	814697	813690	0.0109235	flagellar P-ring protein	flgI	ACATCAACAT--TAGTTTGTTC	cp9,lp28-2
T06TC432		Chrom	814727	Forward	IR BB0772-BB0773	0	814698	814867	0.171598	Intergenic Region	0	ATTTCTTTAA--TATCTATTAT	Not done
T06TC454		Chrom	814995	Forward	BB0773	Reverse	815302	814868	0.707373	conserved hypothetical protein		GTTAATTTTG--TATTTAAAGT	Not done
T05TC110		Chrom	815082	Reverse	BB0773	Reverse	815302	814868	0.504608	conserved hypothetical protein		TACATCAATG--TACATATTGA	Complete
T11TC038		Chrom	827548	Forward	BB0789	Forward	825701	827620	0.96248	cell division protein	ftsH	TTGAAGCTAA--TAAGGATGAA	Complete
T08TC177		Chrom	828671	Forward	BB0790	Forward	827625	829112	0.70343	conserved hypothetical protein		TGCTTGGTTA--TAAAATAAAT	Complete
T08TC426		Chrom	830394	Reverse	BB0792	Reverse	830941	830318	0.876404	conserved hypothetical protein		AATAATGTCA--TAGTAATTAA	lp5
T08TC694		Chrom	830397	Reverse	BB0792	Reverse	830941	830318	0.871589	conserved hypothetical protein		AATGTCATAG--TAATTAAGCT	Complete
T03TC147		Chrom	839114	Reverse	IR BB0796-BB0797	0	839081	839243	0.209877	Intergenic Region	0	GGCTTTTTAA--TAATTAAATA	Complete
T07TC030		Chrom	839210	Reverse	IR BB0796-BB0797	0	839081	839243	0.802469	Intergenic Region	0	TATTTTATAA--TATCAATTGT	lp5
T09TC065		Chrom	839326	Reverse	BB0797	Forward	839244	841832	0.0320711	DNA mismatch repair protein	mutS	TTTTTCAGAG--TAGGAAGTTT	cp9,lp5
T10TC062		Chrom	839792	Forward	BB0797	Forward	839244	841832	0.211747	DNA mismatch repair protein	mutS	CAGAGAAGCT--TAATCTTAGT	lp5
T08TC083		Chrom	839922	Reverse	BB0797	Forward	839244	841832	0.262365	DNA mismatch repair protein	mutS	GGAAAAGCCC--TATTACATTT	lp5
T11TC055		Chrom	839998	Forward	BB0797	Forward	839244	841832	0.291345	DNA mismatch repair protein	mutS	ATTGATAAAA--TAGATATCAA	Not done
T05TC001		Chrom	840050	Forward	BB0797	Forward	839244	841832	0.311437	DNA mismatch repair protein	mutS	TAACTCAAGT--TAATCTTGAA	cp9,lp5
T07TC444		Chrom	840269	Reverse	BB0797	Forward	839244	841832	0.396445	DNA mismatch repair protein	mutS	CTTTTATTAA--TATATGGGAT		lp5
T11TC516		Chrom	840599	Reverse	BB0797	Forward	839244	841832	0.523957	DNA mismatch repair protein	mutS	TTAGCAAGAT--TAATAACCTA	Not done
T09TC154		Chrom	840845	Forward	BB0797	Forward	839244	841832	0.618624	DNA mismatch repair protein	mutS	ATAAAGTTCT--TAAAAAGGTT	lp21,lp5
T09TC163		Chrom	841047	Reverse	BB0797	Forward	839244	841832	0.697063	DNA mismatch repair protein	mutS	TAAAGAAAAG--TATTTTTGTT	lp38	lp5
T05P01C02		Chrom	841132	Reverse	BB0797	Forward	839244	841832	0.729521	DNA mismatch repair protein	mutS	ATGGCGCATA--TAGGCTCTTT	Complete
T08TC174		Chrom	841162	Forward	BB0797	Forward	839244	841832	0.741113	DNA mismatch repair protein	mutS	TCTAAAGCTT--TAATAGGTAT	cp9
T06TC128		Chrom	841379	Forward	BB0797	Forward	839244	841832	0.824961	DNA mismatch repair protein	mutS	TTTTAGAGTA--TATTAAAGCT	lp21
T05TC269		Chrom	841586	Forward	BB0797	Forward	839244	841832	0.904946	DNA mismatch repair protein	mutS	TAGATAGAGC--TAATGTTATT		lp28-1
T07TC092		Chrom	841597	Forward	BB0797	Forward	839244	841832	0.909196	DNA mismatch repair protein	mutS	AATGTTATTC--TAGAAAGTTT	lp5
T11TC246		Chrom	841703	Reverse	BB0797	Forward	839244	841832	0.950541	DNA mismatch repair protein	mutS	CTGATATTCA--TATTAAATTA		cp9
T10P01D06		Chrom	841754	Forward	BB0797	Forward	839244	841832	0.969861	DNA mismatch repair protein	mutS	CTAACATAGA--TATTAATAAT	Not done
T08TC365		Chrom	848006	Reverse	BB0803	Forward	847491	848339	0.608491	tRNA pseudouridine synthase B	truB	AAGGTACTTA--TATTAGGAGT	Complete
T11P01A08	T11P01B03, T11P01D09, T11P01D10, T11P01A08, T11P02B10, T11P02B11	Chrom	848240	Reverse	BB0803	Forward	847491	848339	0.884434	tRNA pseudouridine synthase B	truB	TTGAAATCAA--TATTAATGAA	cp9,lp28-1
T11P01B03	see T11P01A08	Chrom	848240	Reverse	BB0803	Forward	847491	848339	0.883255	tRNA pseudouridine synthase B	truB	TTGAAATCAA--TATTAATGAA	Not done
T11P01D09	see T11P01A08	Chrom	848240	Reverse	BB0803	Forward	847491	848339	0.883255	tRNA pseudouridine synthase B	truB	TTGAAATCAA--TATTAATGAA	Not done
T11P01D10	see T11P01A08	Chrom	848240	Reverse	BB0803	Forward	847491	848339	0.883255	tRNA pseudouridine synthase B	truB	TTGAAATCAA--TATTAATGAA	Not done
T11P02B10	see T11P01A08	Chrom	848240	Reverse	BB0803	Forward	847491	848339	0.884434	tRNA pseudouridine synthase B	truB	TTGAAATCAA--TATTAATGAA	Not done
T11P02B11	see T11P01A08	Chrom	848240	Reverse	BB0803	Forward	847491	848339	0.884434	tRNA pseudouridine synthase B	truB	TTGAAATCAA--TATTAATGAA	Not done
T04TC090		Chrom	848318	Forward	BB0803	Forward	847491	848339	0.975236	tRNA pseudouridine 55 synthase	truB	TGAATAAATA--TAAATATGTC	lp21,lp5
T06TC445		Chrom	857683	Forward	BB0811	Forward	857506	858915	0.125621	conserved hypothetical protein		AGATGGTAAG--TATGTTAACG	lp5
T08TC157		Chrom	858027	Reverse	BB0811	Forward	857506	858915	0.370476	conserved hypothetical protein		ATGTGGTATC--TATTGCAGCT	cp9,lp28-1
T07TC345		Chrom	858174	Reverse	BB0811	Forward	857506	858915	0.474805	conserved hypothetical protein		ATTATCAGGA--TAGAATTTAT	lp38
T09TC347		Chrom	858444	Forward	BB0811	Forward	857506	858915	0.66572	conserved hypothetical protein		TCAAAGGACA--TAGGGACTCT	Complete
T05TC201		Chrom	858707	Reverse	BB0811	Forward	857506	858915	0.853087	conserved hypothetical protein		TCAAATGTTT--TAAGGGGCGT	Complete
T09P02C03		Chrom	858888	Reverse	BB0811	Forward	857506	858915	0.981547	conserved hypothetical protein		ACTCCGAATA--TATTAAAATG	Not done
T09TC008		Chrom	858940	Reverse	BB0812	Reverse	860111	858939	0.998294	phosphopantothenoylcysteine decarboxylase/phosphopantothenate--cysteine ligase	dfp	TTAAGCATAT--TAGTATAAAA	lp5
T09TC139		Chrom	860380	Forward	IR BB0813-BB0814	0	860363	860439	0.223684	Intergenic Region	0	TAAAACTTGA--TACATTATTG	Complete
T06TC081		Chrom	861759	Reverse	BB0814	Forward	860440	861774	0.989505	pantothenate permease	panF	GTAAAAAAAA--TAGTAAGGTT	cp9,lp5
T11TC007		Chrom	861842	Reverse	BB0815	Forward	861784	862677	0.0660694	conserved hypothetical protein		GGCAAGCGAC--TAGATTCAAT	cp9,lp28-1,lp5
T06TC276		Chrom	862514	Reverse	BB0815	Forward	861784	862677	0.818589	conserved hypothetical protein		ACCCATCAAA--TAAGGTCTCA	cp9
T08TC676		Chrom	865103	Reverse	BB0818	Forward	865053	865919	0.0588915	conserved hypothetical protein		TTGGTAACTA--TATGTTTAGT	Complete
T06TC215		Chrom	865195	Reverse	BB0818	Forward	865053	865919	0.165127	conserved hypothetical protein		GATCTTGATA--TAAGAAATTT	Complete
T09TC534		Chrom	865246	Reverse	BB0818	Forward	865053	865919	0.224018	conserved hypothetical protein		TTTTTAAATG--TAGGATATAA	Complete
T04TC350		Chrom	867778	Reverse	BB0823	Reverse	868114	867743	0.902965	lipoprotein, putative		TTGTTGACTA--TATTGATGTC	cp9,lp5
T10TC078		Chrom	868624	Forward	BB0824	Forward	868189	868740	0.789474	conserved hypothetical protein		TGATGGTTTA--TATATTAGGC	lp5
T11P02A03	same site T11P02A03, T11TC383	Chrom	869190	Reverse	BB0825	Reverse	869515	868733	0.414322	conserved hypothetical protein		TTTTTTATTA--TATATGTATA	cp9,lp5
T11TC383	see T11P02A03	Chrom	869190	Reverse	BB0825	Reverse	869515	868733	0.414322	conserved hypothetical protein		TTTTTTATTA--TATATGTATA	Not done
T07TC389		Chrom	869192	Reverse	BB0825	Reverse	869515	868733	0.411765	conserved hypothetical protein		TTTTATTATA--TATGTATAGT	Complete
T04TC045		Chrom	869365	Reverse	BB0825	Reverse	869515	868733	0.190537	conserved hypothetical protein		TTTAGATCTT--TATTTTCAAT	lp5
T03TC227		Chrom	869565	Reverse	BB0826	Reverse	870023	869508	0.887379	conserved hypothetical protein		TTGTTAGTAT--TATGTTTTTA	lp21,lp5
T09P01G10		Chrom	869631	Forward	BB0826	Reverse	870023	869508	0.761165	conserved hypothetical protein		TTTGATAAAT--TATTTTGACA	Not done
T04TC245		Chrom	869693	Reverse	BB0826	Reverse	870023	869508	0.638835	conserved hypothetical protein		TCATTAATAT--TATCTTCATT	cp9,lp5
T06TC160		Chrom	870073	Forward	IR BB0826-BB0827	0	870024	870111	0.563218	Intergenic Region	0	ATTTGATTAT--TATATTTTAT	Complete
T05TC080		Chrom	870080	Reverse	IR BB0826-BB0827	0	870024	870111	0.655172	Intergenic Region	0	TATTATATTT--TATATTATAA	lp5
T04TC435		Chrom	870178	Reverse	BB0827	Reverse	872583	870112	0.972885	ATP-dependent helicase	hrpA	GTAACTTTTG--TATGTATTCT	Complete
T04TC185		Chrom	870492	Forward	BB0827	Reverse	872583	870112	0.846216	ATP-dependent helicase	hrpA	GTTATATTTT--TATGCATCAA	cp32-4,lp5
T11TC177		Chrom	872241	Forward	BB0827	Reverse	872583	870112	0.138406	ATP-dependent helicase	hrpA	TAAAGCAGTG--TATCTTTTTT	cp9,lp38
T08TC036		Chrom	872328	Reverse	BB0827	Reverse	872583	870112	0.102792	ATP-dependent helicase	hrpA	AATCTTATCT--TATAGCCAAC	lp5
T04TC180		Chrom	872601	Reverse	BB0828	Reverse	875132	872586	0.993716	DNA topoisomerase I	topA	ACAAGCTGAA--TACATATTTC	lp5
T07TC460		Chrom	873158	Reverse	BB0828	Reverse	875132	872586	0.774941	DNA topoisomerase I	topA	ACCCCAAGTA--TATTGGGTTT		lp28-1, lp5
T09TC373		Chrom	875166	Reverse	IR BB0828-BB0829	0	875133	875206	0.465753	Intergenic Region	0	TATTATAATA--TATAAATATA	Complete
T08TC401		Chrom	875593	Reverse	BB0829	Forward	875207	876448	0.311845	exonuclease SbcD	sbcD	ATCTTAAGTT--TATTGTTGTT	lp5
T03TC024		Chrom	875773	Forward	BB0829	Forward	875207	876448	0.456084	exonuclease SbcD	sbcD	AAGGAATTCC--TAAGATATTA	lp5
T07TC394		Chrom	876442	Reverse	BB0830	Forward	876429	879281	0.00490884	exonuclease SbcC	sbcC	AATATGAGGA--TAAATAAGCT		lp17
T09TC087		Chrom	876663	Reverse	BB0830	Forward	876429	879281	0.0823983	exonuclease SbcC	sbcC	GACTAGCGCT--TATGTTAAAT	cp32-6,lp21,lp5
T06TC247		Chrom	876673	Reverse	BB0830	Forward	876429	879281	0.0859046	exonuclease SbcC	sbcC	TATGTTAAAT--TAACGTTTAC	lp21
T06TC022		Chrom	876758	Reverse	BB0830	Forward	876429	879281	0.115708	exonuclease SbcC	sbcC	GCATGTTGCT--TAATTGTTTT	lp5
T06TC474		Chrom	876815	Forward	BB0830	Forward	876429	879281	0.135344	exonuclease SbcC	sbcC	TAGAGCATAT--TAAAAGTCTT	Not done
T10TC131		Chrom	876859	Reverse	BB0830	Forward	876429	879281	0.151122	exonuclease SbcC	sbcC	TGTCAAACTG--TAATTTTACC		lp5
T06P01F09		Chrom	878579	Reverse	BB0830	Forward	876429	879281	0.754208	exonuclease SbcC	sbcC	TAGAGCAAAT--TAATAAGAAT	Not done
T04TC317		Chrom	878974	Forward	BB0830	Forward	876429	879281	0.892356	exonuclease SbcC	sbcC	GTTAATAAAA--TAAGAACGGT	Complete
T11TC439		Chrom	879350	Forward	BB0831	Forward	879303	880250	0.0496304	xylose operon regulatory protein	xylR-2	TTGGCGGGAC--TAGTACCAAA	Not done
T05TC384		Chrom	879406	Forward	BB0831	Forward	879303	880250	0.108765	xylose operon regulatory protein	xylR-2	AAAAATGAAA--TAAGCACAGG	Complete
T10TC073		Chrom	879465	Reverse	BB0831	Forward	879303	880250	0.172122	xylose operon regulatory protein	xylR-2	TATTAATTCT--TACAAAGAAT		lp5
T11TC542		Chrom	879785	Reverse	BB0831	Forward	879303	880250	0.510032	xylose operon regulatory protein	xylR-2	AGGTTGGATT--TATGATTACT	Not done
T06TC008		Chrom	880235	Reverse	BB0831	Forward	879303	880250	0.985216	xylose operon regulatory protein	xylR-2	AAAATCAAAA--TAATACCTCA	lp5
T05TC519	same site T05TC519, T07TC414	Chrom	888221	Reverse	IR BB0835-BB0836	0	888183	888296	0.345133	Intergenic Region	0	TTAATTAAAT--TATATTGATT	cp9,lp5
T07TC414	see T05TC519	Chrom	888221	Reverse	IR BB0835-BB0836	0	888183	888296	0.345133	Intergenic Region	0	TTAATTAAAT--TATATTGATT	cp32-6
T07TC436		Chrom	888271	Forward	IR BB0835-BB0836	0	888183	888296	0.778761	Intergenic Region	0	TATTATCATA--TAATTTATAA	cp32-6,lp5
T07TC422		Chrom	889334	Forward	BB0836	Forward	888297	890318	0.513112	excinuclease ABC, subunit B	uvrB	AATCTCATGT--TACATTGCCT		lp5
T04TC313		Chrom	889954	Reverse	BB0836	Forward	888297	890318	0.820386	excinuclease ABC, subunit B	uvrB	AATGGACTTG--TAATAATGTA	cp9
T05TC566		Chrom	889976	Forward	BB0836	Forward	888297	890318	0.830777	excinuclease ABC, subunit B	uvrB	ACGACAAAAT--TAGTTTAGCT	Complete
T07TC121		Chrom	890063	Reverse	BB0836	Forward	888297	890318	0.87432	excinuclease ABC, subunit B	uvrB	ATATTACTCC--TAAGACAATT	lp5
T10TC328		Chrom	890108	Reverse	BB0836	Forward	888297	890318	0.896586	excinuclease ABC, subunit B	uvrB	AAAAGGAACT--TAATAATAAA	cp32-6,lp5
T04TC044		Chrom	897078	Reverse	IR BB0838-BB0839	0	896570	897095	0.969524	Intergenic Region	0	TGTTTTTATG--TATTTTTTGA		lp5
T09TC031		Chrom	897146	Forward	BB0839	Reverse	897740	897096	0.92236	conserved hypothetical protein		TTTCCTGGAA--TAAAAGAAAT	Complete
T09TC009	same site: T09TC009, T11TC323	Chrom	897244	Reverse	BB0839	Reverse	897740	897096	0.768634	conserved hypothetical protein		TTTGCTATTA--TAGATTCCTT		lp5
T11TC323	see T09TC009	Chrom	897244	Forward	BB0839	Reverse	897740	897096	0.770186	conserved hypothetical protein		TTTGCTATTA--TAGATTCCTT	Not done
T10TC207		Chrom	897914	Reverse	BB0840	Reverse	899320	897704	0.869431	lipoprotein, putative		CTGCTGCATT--TATTTCTCCA	Complete
T05TC023		Chrom	898784	Reverse	BB0840	Reverse	899320	897704	0.331064	lipoprotein, putative		GACTTAATTG--TATATATCCT	Complete
T11TC318		Chrom	899186	Reverse	BB0840	Reverse	899320	897704	0.082302	lipoprotein, putative		AAGAGCTTTC--TAGTAGTGTT	Not done
T03TC019		Chrom	899609	Forward	BB0841	Forward	899499	900731	0.0892857	arginine deiminase	arcA	CACCCTTGAT--TATGAAAAAT	Complete
T04TC102		Chrom	899815	Reverse	BB0841	Forward	899499	900731	0.257305	arginine deiminase	arcA	ACAGATGGTG--TAATTAATAT	Complete
T08TC264		Chrom	903956	Reverse	BB0844	Reverse	904900	903929	0.971164	hypothetical protein		AAAAATCATA--TAATCTATCG	Complete
T08TC482		Chrom	904177	Forward	BB0844	Reverse	904900	903929	0.744593	hypothetical protein		TTACGTTTGT--TATTTAATCT	lp5
T05TC529	same site:T05TC529, T09TC034	Chrom	904268	Forward	BB0844	Reverse	904900	903929	0.650875	hypothetical protein		GTCCACTATT--TAATTGAGTA	lp38,lp5
T09TC034	see T05TC529	Chrom	904268	Reverse	BB0844	Reverse	904900	903929	0.649846	hypothetical protein		GTCCACTATT--TAATTGAGTA	cp9
T05TC628		Chrom	905028	Reverse	BB0845.1	Reverse	905255	905025	0.982609	hypothetical protein, pseudogene		TTTGACTATG--TAACTTATAA	cp9,lp5	cp32-9,lp28-1
T09TC428		Chrom	905095	Reverse	BB0845.1	Reverse	905255	905025	0.691304	hypothetical protein, pseudogene		ATTGTGTAAT--TAGTAGATGT		lp5
T09TC020		Chrom	905117	Reverse	BB0845.1	Reverse	905255	905025	0.595652	hypothetical protein, pseudogene		TAATGAAGGG--TATGTGCAAA		lp5
T06TC575		Chrom	905335	Reverse	IR BB0845.1-BB0845.2	0	905256	905474	0.366972	Intergenic Region	0	CTTCACCCAA--TATGTTTGAT	Not done
T06TC024		Chrom	905410	Forward	IR BB0845.1-BB0845.2	0	905256	905474	0.706422	Intergenic Region	0	AAAATAAGTA--TATGGTGTTT	Complete
T06TC416		Chrom	905495	Reverse	BB0845.2	Forward	905475	905775	0.07	hypothetical protein, pseudogene		TTATTTTAGC--TATTATATTT	Not done
T09TC316		Chrom	905664	Forward	BB0845.2	Forward	905475	905775	0.63	hypothetical protein, pseudogene		AATAGCATAT--TATCTTGTAC	Complete
T08P01F06		Chrom	906235	Reverse	BB0849	Forward	906162	906263	0.732673	hypothetical protein		TTAAGCCAAG--TAAGTATAAA	lp5
T11P01H08		Chrom	906897	Forward	IR BB0849.1-BB0849.2	0	906726	907224	0.343373	Intergenic Region	0	ATCTTAAGTA--TAGAGCATTA	Not done
T04TC221		Chrom	907089	Reverse	IR BB0849.1-BB0849.2	0	906726	907224	0.730924	Intergenic Region	0	ATAGCAACCT--TATTTAAGGT	Complete
T04TC057		Chrom	907311	Forward	BB0849.2	Forward	907225	908225	0.086	conserved hypothetical protein, pseudogene		CATTAAATTT--TAAAGCAAAA	Complete
T05TC535		Chrom	908221	Forward	BB0849.2	Forward	907225	908225	0.996	conserved hypothetical protein, pseudogene		AATTATTCGC--TAAATACTAA	lp38,cp9
T11TC453		Chrom	908548	Reverse	BB0852	Forward	908407	909591	0.119932	type I restriction enzyme r protein n terminus (hsdr_n)		TGCGATGGGC--TATGATCATA	lp5	cp9
T08TC114		Chrom	908556	Forward	BB0852	Forward	908407	909591	0.125845	type I restriction enzyme r protein n terminus (hsdr_n)		GCTATGATCA--TACTGATATT	lp5
T06TC568		cp09	36	Forward	IR -BBC01	0	0	162	0.222222	Intergenic Region	0	TTTATATTTA--TATAATCTTG	Not done
T03TC107	same site: T03TC107, T09TC468, T10TC144	cp09	38	Reverse	IR -BBC01	0	0	162	0.240741	Intergenic Region	0	TATATTTATA--TAATCTTGTA	Complete
T09TC468	same site: T03TC107, T09TC468, T10TC144	cp09	38	Reverse	IR -BBC01	0	0	162	0.240741	Intergenic Region	0	TATATTTATA--TAATCTTGTA	Complete
T10TC144	same site: T03TC107, T09TC468, T10TC144	cp09	38	Forward	IR -BBC01	0	0	162	0.234568	Intergenic Region	0	TATATTTATA--TAATCTTGTA	cp32-6,lp21,lp5
T11P02D03		cp09	1257	Reverse	BBC01	Forward	163	1272	0.987376	paralogous family 57 protein	PF57	AAGAATTAGA--TAGAAAGGCT	Complete
T04TC106		cp09	1268	Forward	BBC01	Forward	163	1272	0.996393	paralogous family 57 protein	PF57	AGAAAGGCTA--TATAAGGATT	lp5
T10TC303		cp09	1278	Forward	IR BBC01-BBC02	0	1273	1281	0.625	Intergenic Region	0	TATAAGGATT--TAATATGGAA	lp5
T11TC217		cp09	1295	Forward	BBC02	Forward	1282	1839	0.0233393	paralogous family 50 protein	PF50	GAAAATTCAC--TAAAAGTTGG	lp5
T09TC300		cp09	1312	Reverse	BBC02	Forward	1282	1839	0.0556553	paralogous family 50 protein	PF50	TGGGCAAACA--TATAAAGAAA	Complete
T09TC370		cp09	1384	Forward	BBC02	Forward	1282	1839	0.183124	paralogous family 50 protein	PF50	TAAAACTGTG--TATCACACTA		lp5
T06TC017		cp09	1397	Forward	BBC02	Forward	1282	1839	0.206463	paralogous family 50 protein	PF50	CACACTAAGA--TAATGATGGA	Complete
T04TC066	T04TC066, T04TC112; same site: T06TC084, T09TC492, T10TC478	cp09	1469	Reverse	BBC02	Forward	1282	1839	0.337522	paralogous family 50 protein	PF50	TTTAGAGAAT--TATATAATCA	Complete
T04TC112	see T04TC066	cp09	1469	Reverse	BBC02	Forward	1282	1839	0.337522	paralogous family 50 protein	PF50	TTTAGAGAAT--TATATAATCA	lp5
T06TC084	see T04TC066	cp09	1469	Reverse	BBC02	Forward	1282	1839	0.337522	paralogous family 50 protein	PF50	TTTAGAGAAT--TATATAATCA	lp5
T09TC492	see T04TC066	cp09	1469	Reverse	BBC02	Forward	1282	1839	0.337522	paralogous family 50 protein	PF50	TTTAGAGAAT--TATATAATCA	Complete
T10TC478	see T04TC066	cp09	1469	Reverse	BBC02	Forward	1282	1839	0.337522	paralogous family 50 protein	PF50	TTTAGAGAAT--TATATAATCA	lp5
T08TC282	same site: T08TC282, T09TC434	cp09	1509	Reverse	BBC02	Forward	1282	1839	0.409336	paralogous family 50 protein	PF50	GCCTATATCC--TATAAGGAAA	Complete
T09TC434	same site: T08TC282, T09TC434	cp09	1509	Forward	BBC02	Forward	1282	1839	0.40754	paralogous family 50 protein	PF50	GCCTATATCC--TATAAGGAAA	Complete
T07TC443		cp09	1551	Reverse	BBC02	Forward	1282	1839	0.48474	paralogous family 50 protein	PF50	TTTATGGCTA--TAGAAAACCA	lp5
T09TC439	T09TC439, T09TC440	cp09	1584	Forward	BBC02	Forward	1282	1839	0.54219	paralogous family 50 protein	PF50	TTGTAAGATA--TACAATGGAT	Complete
T09TC440	T09TC439, T09TC440	cp09	1584	Forward	BBC02	Forward	1282	1839	0.54219	paralogous family 50 protein	PF50	TTGTAAGATA--TACAATGGAT	Complete
T08TC536		cp09	1607	Forward	BBC02	Forward	1282	1839	0.583483	paralogous family 50 protein	PF50	GTTAAAAAAG--TATATTCATT	lp5
T09TC053		cp09	1641	Reverse	BBC02	Forward	1282	1839	0.64632	paralogous family 50 protein	PF50	ACATAGAGTT--TAGATTTAAA	Complete
T07TC332		cp09	1709	Reverse	BBC02	Forward	1282	1839	0.768402	paralogous family 50 protein	PF50	AAAGAAAAGA--TAGATACACC		lp5
T05TC012		cp09	1713	Forward	BBC02	Forward	1282	1839	0.773788	paralogous family 50 protein	PF50	AAAAGATAGA--TACACCCTAT	lp5
T10TC011		cp09	1720	Reverse	BBC02	Forward	1282	1839	0.788151	paralogous family 50 protein	PF50	AGATACACCC--TATAATAAAG	lp5
T03TC119	T03TC119, T03TC134	cp09	1766	Reverse	BBC02	Forward	1282	1839	0.870736	paralogous family 50 protein	PF50	GAAAAACATG--TATATGAATT	Complete
T03TC134	see T03TC119	cp09	1766	Reverse	BBC02	Forward	1282	1839	0.870736	paralogous family 50 protein	PF50	GAAAAACATG--TATATGAATT	Complete
T09TC202		cp09	1777	Forward	BBC02	Forward	1282	1839	0.888689	paralogous family 50 protein	PF50	ATATGAATTT--TACAATAAAA	lp5
T09TC336		cp09	1823	Forward	BBC02	Forward	1282	1839	0.971275	paralogous family 50 protein	PF50	AAGTGGATAT--TAAAAAATCT		lp38,lp5
T08P02A04	same site T08P02A04, T10TC368	cp09	1837	Reverse	BBC02	Forward	1282	1839	0.998205	paralogous family 50 protein	PF50	AAATCTAAAA--TAGTAACAAT	lp5
T10TC368	same site T08P02A04, T10TC368	cp09	1837	Reverse	BBC02	Forward	1282	1839	0.998205	paralogous family 50 protein	PF50	AAATCTAAAA--TAGTAACAAT		lp5
T08TC260		cp09	1840	Forward	IR BBC02-BBC03	0	1840	1891	0	Intergenic Region	0	TCTAAAATAG--TAACAATAAT	cp32-3,lp5
T03TC061	same site T03TC061, T05TC465	cp09	1852	Forward	IR BBC02-BBC03	0	1840	1891	0.235294	Intergenic Region	0	ACAATAATAT--TAATTAAGGA	Complete
T05TC465	see T03TC061	cp09	1852	Forward	IR BBC02-BBC03	0	1840	1891	0.235294	Intergenic Region	0	ACAATAATAT--TAATTAAGGA	lp5
T09TC127		cp09	1877	Forward	IR BBC02-BBC03	0	1840	1891	0.72549	Intergenic Region	0	TTGACAAAAA--TAAAGGAAAA	Complete
T04TC089	same site: T04TC089, T05TC146	cp09	1995	Forward	BBC03	Forward	1892	2452	0.183929	paralogous family 49 protein	PF49	TACAAGACAC--TAAAGGAAAA	lp5
T05TC146	same site: T04TC089, T05TC146	cp09	1995	Reverse	BBC03	Forward	1892	2452	0.185714	paralogous family 49 protein	PF49	TACAAGACAC--TAAAGGAAAA	lp5
T07TC243		cp09	2104	Reverse	BBC03	Forward	1892	2452	0.380357	paralogous family 49 protein	PF49	TTGATGGTTA--TAAAACTTTT	Complete
T03TC012		cp09	2158	Forward	BBC03	Forward	1892	2452	0.475	paralogous family 49 protein	PF49	CTCAAGCGTA--TAAGTATTTA	lp5
T11P01G02		cp09	2162	Reverse	BBC03	Forward	1892	2452	0.483929	paralogous family 49 protein	PF49	AGCGTATAAG--TATTTAAGAT	lp21
T10P01G12		cp09	2197	Forward	BBC03	Forward	1892	2452	0.544643	paralogous family 49 protein	PF49	AAGAAGGGCT--TATAAAAGAA	Not done
T08TC359		cp09	2210	Reverse	BBC03	Forward	1892	2452	0.569643	paralogous family 49 protein	PF49	AAAAGAAGAT--TATTTAATAG	lp5
T08TC039		cp09	2250	Forward	BBC03	Forward	1892	2452	0.639286	paralogous family 49 protein	PF49	TATAATTTTA--TAAAAGATAA	Complete
T10TC189		cp09	2298	Reverse	BBC03	Forward	1892	2452	0.726786	paralogous family 49 protein	PF49	CAAAATCCAA--TAAAACCATT	lp5
T09TC473		cp09	2450	Reverse	BBC03	Forward	1892	2452	0.998214	paralogous family 49 protein	PF49	ACTAAAAATC--TAATTTTAGA	Complete
T04TC115		cp09	2921	Forward	BBC05	Forward	2804	3712	0.128855	conserved hypothetical protein		TCTTAAAGGT--TATGGCTATA	Complete
T03TC110		cp09	2929	Reverse	BBC05	Forward	2804	3712	0.138767	conserved hypothetical protein		GTTATGGCTA--TAAGTATCAG	lp21,lp38
T03TC113		cp09	2933	Forward	BBC05	Forward	2804	3712	0.14207	conserved hypothetical protein		TGGCTATAAG--TATCAGAATT	lp5
T11TC477		cp09	3048	Forward	BBC05	Forward	2804	3712	0.268722	conserved hypothetical protein		CAACAAGTTC--TACATGTTGT	Not done
T09TC280		cp09	3076	Reverse	BBC05	Forward	2804	3712	0.300661	conserved hypothetical protein		CGTTTTATAG--TACAAACACT	lp5
T03TC033		cp09	3114	Forward	BBC05	Forward	2804	3712	0.34141	conserved hypothetical protein		GATACGCCAA--TACTTACAGA	Complete
T10TC323		cp09	3222	Forward	BBC05	Forward	2804	3712	0.460352	conserved hypothetical protein		AGATACGCAT--TAGTAGCATA	lp5
T10TC469		cp09	3230	Forward	BBC05	Forward	2804	3712	0.469163	conserved hypothetical protein		ATTAGTAGCA--TATCTTAACA	Complete
T06TC041		cp09	3275	Reverse	BBC05	Forward	2804	3712	0.519824	conserved hypothetical protein		AGCTCCTATT--TACAATAACC	lp5
T09TC357		cp09	3325	Reverse	BBC05	Forward	2804	3712	0.57489	conserved hypothetical protein		AAGCTGGTGT--TAACCAAAAT	lp21
T06TC004		cp09	3377	Reverse	BBC05	Forward	2804	3712	0.632159	conserved hypothetical protein		CGGAAAGTAT--TATTGCTATG	lp5
T05TC622		cp09	3474	Forward	BBC05	Forward	2804	3712	0.737885	conserved hypothetical protein		ATTCGGGCAT--TATGTTTTGA	lp5
T08TC077		cp09	4246	Reverse	BBC06	Reverse	4377	3853	0.248092	exported protein A	eppA	TTTTGTTAAG--TAAATCATAA	Complete
T10P01B07		cp09	4300	Forward	BBC06	Reverse	4377	3853	0.146947	exported protein A	eppA	AATTTTTTTT--TATATCTTGA	lp21,lp17,lp28-2,lp5	lp28-1
T09TC037		cp09	4324	Forward	BBC06	Reverse	4377	3853	0.101145	exported protein A	eppA	TAAAAGCACT--TAAATCAATG	lp5
T10TC415		cp09	4345	Reverse	BBC06	Reverse	4377	3853	0.0591603	exported protein A	eppA	TTAACATAAA--TAATAAAAAT	Complete
T06TC370		cp09	4377	Forward	BBC06	Reverse	4377	3853	0	exported protein A	eppA	ATTTTTCTCA--TATCCTCTCC	lp21,lp5
T05TC559	same site T05TC559,T08TC600	cp09	4397	Reverse	IR BBC06-BBC07	0	4378	4503	0.16	Intergenic Region	0	TAGGCTTTAT--TATATACATT	lp5
T08TC600	see T05TC559	cp09	4397	Forward	IR BBC06-BBC07	0	4378	4503	0.152	Intergenic Region	0	TAGGCTTTAT--TATATACATT	Complete
T11TC257		cp09	4401	Reverse	IR BBC06-BBC07	0	4378	4503	0.192	Intergenic Region	0	CTTTATTATA--TACATTCTTA		lp5
T04TC076		cp09	4412	Reverse	IR BBC06-BBC07	0	4378	4503	0.28	Intergenic Region	0	ACATTCTTAT--TAGCAATACT	Complete
T07TC026		cp09	4449	Forward	IR BBC06-BBC07	0	4378	4503	0.568	Intergenic Region	0	GACTAACAAA--TAGTCTTATT	lp28-1
T03TC096		cp09	4573	Forward	BBC07	Reverse	4788	4504	0.757042	hypothetical protein		AGGGGGTTAT--TATTGTGAAA	lp5
T09P01B01		cp09	4604	Reverse	BBC07	Reverse	4788	4504	0.644366	hypothetical protein		CTTTCTATGG--TACGCATTAA	Not done
T05TC197		cp09	4641	Reverse	BBC07	Reverse	4788	4504	0.514085	hypothetical protein		GCTTTAGTTT--TATAAAGATT	Complete
T08P01H01		cp09	4692	Forward	BBC07	Reverse	4788	4504	0.338028	hypothetical protein		TTAAATATTT--TAGTCTCTAA	Not done
T08TC416		cp09	4893	Forward	IR BBC07-BBC08	0	4789	5533	0.139785	Intergenic Region	0	ATTAAAAACA--TAATAAGAAT	Complete
T10TC445		cp09	4896	Forward	IR BBC07-BBC08	0	4789	5533	0.143817	Intergenic Region	0	AAAAACATAA--TAAGAATACA	lp21	lp5
T03TC004	same site: T03TC004, T08TC618	cp09	4964	Forward	IR BBC07-BBC08	0	4789	5533	0.235215	Intergenic Region	0	AAAGCAAAAT--TATTTAATTG		lp5
T08TC618	same site: T03TC004, T08TC618	cp09	4964	Forward	IR BBC07-BBC08	0	4789	5533	0.235215	Intergenic Region	0	AAAGCAAAAT--TATTTAATTG	lp5
T09TC089		cp09	4994	Forward	IR BBC07-BBC08	0	4789	5533	0.275538	Intergenic Region	0	AATTTCAAGA--TATATTATTG	Complete
T06TC234	same site: T06TC234, T07TC471, T10TC481	cp09	4996	Forward	IR BBC07-BBC08	0	4789	5533	0.278226	Intergenic Region	0	TTTCAAGATA--TATTATTGAA	Complete
T07TC471	see T06TC234	cp09	4996	Reverse	IR BBC07-BBC08	0	4789	5533	0.27957	Intergenic Region	0	TTTCAAGATA--TATTATTGAA	lp5
T10TC481	see T06TC234	cp09	4996	Forward	IR BBC07-BBC08	0	4789	5533	0.278226	Intergenic Region	0	TTTCAAGATA--TATTATTGAA		cp32-9,cp9,lp28-1
T07TC300		cp09	5042	Forward	IR BBC07-BBC08	0	4789	5533	0.340054	Intergenic Region	0	ATAGTTTATA--TATTTTTGCA		lp17
T09TC441		cp09	5124	Reverse	IR BBC07-BBC08	0	4789	5533	0.451613	Intergenic Region	0	ATTAACAAAC--TATAAATATA		lp5
T11TC238		cp09	5231	Forward	IR BBC07-BBC08	0	4789	5533	0.594086	Intergenic Region	0	GTTTTTTATA--TAAAATAGTC	Complete
T09TC477		cp09	5242	Forward	IR BBC07-BBC08	0	4789	5533	0.608871	Intergenic Region	0	AAAATAGTCG--TAGTATATCA	Complete
T07TC376		cp09	5340	Reverse	IR BBC07-BBC08	0	4789	5533	0.741935	Intergenic Region	0	TTAGCACTAC--TAGCTATTCT	lp28-1,lp5	lp38
T06TC511		cp09	5521	Forward	IR BBC07-BBC08	0	4789	5533	0.983871	Intergenic Region	0	ACTACTACTT--TAGAGTAGCC	Not done
T10TC163		cp09	5578	Forward	BBC08	Forward	5534	5980	0.0986547	TM2 domain family		TTACAAGTTT--TATTTATAAA	lp5
T08TC522		cp09	5614	Forward	BBC08	Forward	5534	5980	0.179372	TM2 domain family		CTCAATATTT--TAATGATGAT	lp5
T04TC217		cp09	5625	Reverse	BBC08	Forward	5534	5980	0.206278	TM2 domain family		AATGATGATA--TACCATGCAA	lp28-2
T10TC204		cp09	5649	Forward	BBC08	Forward	5534	5980	0.257848	TM2 domain family		TGCAATAGAT--TAATTAGAAA	lp5
T03TC094		cp09	5717	Forward	BBC08	Forward	5534	5980	0.410314	TM2 domain family		AAAATCTTAT--TATGGATTAA	Complete
T06TC243		cp09	5724	Reverse	BBC08	Forward	5534	5980	0.428251	TM2 domain family		TATTATGGAT--TAATAGCATT	lp5
T10P01H02	T10P01H02, T10P01H03	cp09	5756	Forward	BBC08	Forward	5534	5980	0.497758	TM2 domain family		ATTTTTTGGC--TATTTAGGAT	Not done
T10P01H03	T10P01H02, T10P01H03	cp09	5756	Forward	BBC08	Forward	5534	5980	0.497758	TM2 domain family		ATTTTTTGGC--TATTTAGGAT	Not done
T08TC241		cp09	5818	Forward	BBC08	Forward	5534	5980	0.636771	TM2 domain family		CATTTTTATT--TATATCTATT	lp5
T10TC003		cp09	5880	Reverse	BBC08	Forward	5534	5980	0.778027	TM2 domain family		ACTAATTATT--TATTAGTCTT		lp5
T07TC324	T07TC324, T07TC399	cp09	5883	Forward	BBC08	Forward	5534	5980	0.782511	TM2 domain family		AATTATTTAT--TAGTCTTGTT	cp32-9	lp5
T07TC399	see T07TC324	cp09	5883	Forward	BBC08	Forward	5534	5980	0.782511	TM2 domain family		AATTATTTAT--TAGTCTTGTT	Complete
T07TC259		cp09	6018	Forward	IR BBC08-BBC10	0	5981	6280	0.123746	Intergenic Region	0	ATTTTCATAG--TAGTTACAAT	lp5
T03TC132	same site: T03TC132, T09TC309, T09TC323	cp09	6062	Forward	IR BBC08-BBC10	0	5981	6280	0.270903	Intergenic Region	0	CAAAAATATA--TAAATATCAT	lp5
T09TC309	same site: T03TC132, T09TC309, T09TC323	cp09	6062	Reverse	IR BBC08-BBC10	0	5981	6280	0.274247	Intergenic Region	0	CAAAAATATA--TAAATATCAT	lp5
T09TC323	same site: T03TC132, T09TC309, T09TC323	cp09	6062	Forward	IR BBC08-BBC10	0	5981	6280	0.270903	Intergenic Region	0	CAAAAATATA--TAAATATCAT	lp5
T03TC081	same site: T03TC081, T04TC101	cp09	6071	Reverse	IR BBC08-BBC10	0	5981	6280	0.304348	Intergenic Region	0	ATAAATATCA--TATATATATC		lp5
T04TC101	same site: T03TC081, T04TC101	cp09	6071	Reverse	IR BBC08-BBC10	0	5981	6280	0.304348	Intergenic Region	0	ATAAATATCA--TATATATATC	lp5
T07TC145	same site: T07TC145, T09TC064, T09TC388	cp09	6073	Reverse	IR BBC08-BBC10	0	5981	6280	0.311037	Intergenic Region	0	AAATATCATA--TATATATCCT	lp5
T09TC064	see T07TC145	cp09	6073	Forward	IR BBC08-BBC10	0	5981	6280	0.307692	Intergenic Region	0	AAATATCATA--TATATATCCT	cp32-7
T09TC388	see T07TC145	cp09	6073	Forward	IR BBC08-BBC10	0	5981	6280	0.307692	Intergenic Region	0	AAATATCATA--TATATATCCT	lp5	lp28-1
T04TC048	same site: T04TC048, T05TC251, T07TC224, T10TC489, T11TC146, T11TC282	cp09	6075	Forward	IR BBC08-BBC10	0	5981	6280	0.314381	Intergenic Region	0	ATATCATATA--TATATCCTCT	Complete
T05TC251	see T04TC048	cp09	6075	Forward	IR BBC08-BBC10	0	5981	6280	0.314381	Intergenic Region	0	ATATCATATA--TATATCCTCT	Complete
T07TC224	see T04TC048	cp09	6075	Reverse	IR BBC08-BBC10	0	5981	6280	0.317726	Intergenic Region	0	ATATCATATA--TATATCCTCT	lp5
T10TC489	see T04TC048	cp09	6075	Reverse	IR BBC08-BBC10	0	5981	6280	0.317726	Intergenic Region	0	ATATCATATA--TATATCCTCT		lp5
T11TC146	see T04TC048	cp09	6075	Forward	IR BBC08-BBC10	0	5981	6280	0.314381	Intergenic Region	0	ATATCATATA--TATATCCTCT	lp5
T11TC282	see T04TC048	cp09	6075	Reverse	IR BBC08-BBC10	0	5981	6280	0.317726	Intergenic Region	0	ATATCATATA--TATATCCTCT		lp5
T03TC159		cp09	6077	Forward	IR BBC08-BBC10	0	5981	6280	0.32107	Intergenic Region	0	ATCATATATA--TATCCTCTTA		lp5
T08TC558	same site T08TC558, T11TC345	cp09	6085	Forward	IR BBC08-BBC10	0	5981	6280	0.347826	Intergenic Region	0	TATATCCTCT--TAATCTTCAA	lp5
T11TC345	see T08TC558	cp09	6085	Forward	IR BBC08-BBC10	0	5981	6280	0.347826	Intergenic Region	0	TATATCCTCT--TAATCTTCAA	Not done
T04TC103		cp09	6165	Forward	IR BBC08-BBC10	0	5981	6280	0.615385	Intergenic Region	0	TTTTACTTAC--TAAATTGCTC		lp5
T09TC313	T09TC313, T09TC342	cp09	6205	Forward	IR BBC08-BBC10	0	5981	6280	0.749164	Intergenic Region	0	TGCATACAAT--TAAAGTTAGA	cp32-9,lp5
T09TC342	T09TC313, T09TC342	cp09	6205	Reverse	IR BBC08-BBC10	0	5981	6280	0.752508	Intergenic Region	0	TGCATACAAT--TAAAGTTAGA		lp5
T05TC204		cp09	6211	Forward	IR BBC08-BBC10	0	5981	6280	0.769231	Intergenic Region	0	CAATTAAAGT--TAGATAACTA	Complete
T04TC373		cp09	6221	Reverse	IR BBC08-BBC10	0	5981	6280	0.80602	Intergenic Region	0	TAGATAACTA--TATTAAGTGT	Complete
T11TC053		cp09	6282	Reverse	BBC10	Reverse	6808	6281	0.996205	rev protein	rev	GTTCTTTATT--TAATCTTCTT	lp5
T09TC340		cp09	6302	Forward	BBC10	Reverse	6808	6281	0.960152	rev protein	rev	CAAGATATTT--TATTATACTG	cp32-7,lp38
T03TC152		cp09	6314	Reverse	BBC10	Reverse	6808	6281	0.935484	rev protein	rev	TTATACTGTC--TATATGTGCT	lp5
T11TC137	T11TC137, T11TC138	cp09	6352	Forward	BBC10	Reverse	6808	6281	0.865275	rev protein	rev	TCTTTTATGT--TAATAGCATG	lp5
T11TC138	T11TC137, T11TC138	cp09	6352	Forward	BBC10	Reverse	6808	6281	0.865275	rev protein	rev	TCTTTTATGT--TAATAGCATG	lp5
T11TC248		cp09	6355	Reverse	BBC10	Reverse	6808	6281	0.857685	rev protein	rev	TTTATGTTAA--TAGCATGGAG		lp5
T09TC324		cp09	6379	Reverse	BBC10	Reverse	6808	6281	0.812144	rev protein	rev	ATAGGACTGG--TATTTACTCC	Complete		Transposon insertion in cp9 PCR region
T10TC359		cp09	6401	Reverse	BBC10	Reverse	6808	6281	0.770398	rev protein	rev	CTGATAGAGC--TATTGAGCGT		lp5	Transposon insertion in cp9 PCR region
T08TC452		cp09	6494	Reverse	BBC10	Reverse	6808	6281	0.593928	rev protein	rev	TTAAGGCGTT--TAGTTTGGAT	lp5		Transposon insertion in cp9 PCR region
T08TC486		cp09	6565	Forward	BBC10	Reverse	6808	6281	0.461101	rev protein	rev	TCTTTAGCAT--TAGTTGCATA	lp5		Transposon insertion in cp9 PCR region
T05TC120		cp09	6578	Forward	BBC10	Reverse	6808	6281	0.436433	rev protein	rev	TTGCATATTT--TAAGTCTTCT	lp21,lp5		Transposon insertion in cp9 PCR region
T08TC668		cp09	6664	Forward	BBC10	Reverse	6808	6281	0.273245	rev protein	rev	GAGACACTCA--TAATAAGCCA		lp5
T07TC418		cp09	6667	Forward	BBC10	Reverse	6808	6281	0.267552	rev protein	rev	ACACTCATAA--TAAGCCAATT	lp5
T08TC651		cp09	6731	Reverse	BBC10	Reverse	6808	6281	0.144213	rev protein	rev	TCCTTTTTAT--TATAAATAGT	lp5
T03TC245	T06TC291, T06TC332, same site:T03TC245	cp09	6737	Forward	BBC10	Reverse	6808	6281	0.134725	rev protein	rev	TTATTATAAA--TAGTTCACAA	Complete
T06TC291	T06TC291, T06TC332, same site:T03TC245	cp09	6737	Reverse	BBC10	Reverse	6808	6281	0.132827	rev protein	rev	TTATTATAAA--TAGTTCACAA	lp21,lp28-1,lp5
T06TC332	T06TC291, T06TC332, same site:T03TC245	cp09	6737	Reverse	BBC10	Reverse	6808	6281	0.132827	rev protein	rev	TTATTATAAA--TAGTTCACAA	lp5
T03TC040		cp09	6752	Forward	BBC10	Reverse	6808	6281	0.106262	rev protein	rev	CACAAGATAT--TACAAATAAT	Complete
T10TC485		cp09	6758	Forward	BBC10	Reverse	6808	6281	0.0948767	rev protein	rev	ATATTACAAA--TAATGAAAAT	Complete
T10TC509		cp09	6821	Reverse	IR BBC10-BBC11	0	6809	6973	0.0792683	Intergenic Region	0	ATTTTTCCTT--TATTTAATAA	Complete
T06TC538		cp09	6888	Forward	IR BBC10-BBC11	0	6809	6973	0.481707	Intergenic Region	0	TTTGATATCA--TAGAAACTAT	Not done
T08P01F03		cp09	6902	Reverse	IR BBC10-BBC11	0	6809	6973	0.573171	Intergenic Region	0	AACTATGACA--TAGAATTAAT	Not done
T08P01H07	T08P01H07, T08P02F04	cp09	6913	Forward	IR BBC10-BBC11	0	6809	6973	0.634146	Intergenic Region	0	AGAATTAATA--TAAATTAATA	Not done
T08P02F04	T08P01H07, T08P02F04	cp09	6913	Forward	IR BBC10-BBC11	0	6809	6973	0.634146	Intergenic Region	0	AGAATTAATA--TAAATTAATA	Not done
T09TC249		cp09	6918	Forward	IR BBC10-BBC11	0	6809	6973	0.664634	Intergenic Region	0	TAATATAAAT--TAATATTATT	lp21
T05TC484		cp09	6924	Reverse	IR BBC10-BBC11	0	6809	6973	0.707317	Intergenic Region	0	AAATTAATAT--TATTTTATTT	Complete
T09TC267	T09TC267, T09TC293	cp09	6956	Reverse	IR BBC10-BBC11	0	6809	6973	0.902439	Intergenic Region	0	TTGTTTGATT--TAAAAGTGGA	cp9,lp5
T09TC293	T09TC267, T09TC293	cp09	6956	Reverse	IR BBC10-BBC11	0	6809	6973	0.902439	Intergenic Region	0	TTGTTTGATT--TAAAAGTGGA	lp38
T11TC182		cp09	7020	Forward	BBC11	Forward	6974	7771	0.0577164	conserved hypothetical protein		ACCGCAGAAG--TATTGCTTAA	lp5	lp28-1
T06TC408		cp09	7062	Reverse	BBC11	Forward	6974	7771	0.111669	conserved hypothetical protein		ATACTACAAA--TAATAGATAA	Not done
T08TC638	same site: T08TC638, T10TC347	cp09	7164	Reverse	BBC11	Forward	6974	7771	0.239649	conserved hypothetical protein		AAGTTGTACT--TAAATCCAAA	Complete
T10TC347	same site: T08TC638, T10TC347	cp09	7164	Forward	BBC11	Forward	6974	7771	0.238394	conserved hypothetical protein		AAGTTGTACT--TAAATCCAAA	Complete
T11TC412		cp09	7185	Reverse	BBC11	Forward	6974	7771	0.265997	conserved hypothetical protein		ACTAATCAAT--TAATTATAAA	Not done
T06TC307		cp09	7209	Forward	BBC11	Forward	6974	7771	0.294856	conserved hypothetical protein		GTCAAGACAT--TAAAACAAAT	lp28-1,lp5
T03TC072		cp09	7254	Reverse	BBC11	Forward	6974	7771	0.352572	conserved hypothetical protein		CACCTACTGG--TAATAAGTGG	lp5
T08TC406		cp09	7340	Forward	BBC11	Forward	6974	7771	0.459222	conserved hypothetical protein		AAAAACTTTA--TACAACATAA		lp28-3, lp36
T03TC265		cp09	7378	Forward	BBC11	Forward	6974	7771	0.506901	conserved hypothetical protein		AAAAATTTAC--TACTTGTACT	Complete
T07TC285		cp09	7399	Reverse	BBC11	Forward	6974	7771	0.534504	conserved hypothetical protein		GAGAATTTGT--TATAACCGAA	cp9,lp5	lp17
T05TC572		cp09	7417	Forward	BBC11	Forward	6974	7771	0.555834	conserved hypothetical protein		AAAAAGAATT--TAATGCTATT		lp5
T03TC015	same site T03TC015, T09TC328, T11TC253	cp09	7537	Reverse	BBC11	Forward	6974	7771	0.707654	conserved hypothetical protein		GCATTGACTG--TATTGCTAAA		lp5
T09TC328	see T03TC015	cp09	7537	Reverse	BBC11	Forward	6974	7771	0.707654	conserved hypothetical protein		GCATTGACTG--TATTGCTAAA		lp5
T11TC253	see T03TC015	cp09	7537	Forward	BBC11	Forward	6974	7771	0.706399	conserved hypothetical protein		GCATTGACTG--TATTGCTAAA	lp5
T09TC217		cp09	7589	Reverse	BBC11	Forward	6974	7771	0.772898	conserved hypothetical protein		TGAAGCACGT--AAATCACTTC	lp21,lp5		anomolous transposition event
T05TC057		cp09	7602	Forward	BBC11	Forward	6974	7771	0.787955	conserved hypothetical protein		TCACTTCATT--TATGTAGAAA	lp28-2	lp5
T08TC054		cp09	7669	Forward	BBC11	Forward	6974	7771	0.87202	conserved hypothetical protein		TTAAAGAACT--TATGAAATAT	Complete
T10TC541		cp09	7688	Reverse	BBC11	Forward	6974	7771	0.897114	conserved hypothetical protein		TTCTTCAACA--TATGAAATTG	Complete
T04TC374		cp09	7702	Forward	BBC11	Forward	6974	7771	0.913425	conserved hypothetical protein		AAATTGATAA--TATTTATGGA	Complete
T11P01A05	T11P01A05, T11P01B02, T11P01B08, T11P01C02, T11P01C011, T11P01E03, T11P01E08, T11P01F01, T11P01F02, T11P01G05, T11P02A02, T11P02A04, T11P02A06	cp09	7769	Reverse	BBC11	Forward	6974	7771	0.997491	conserved hypothetical protein		TATTGCCTTA--TAGCTTAACC	Complete
T11P01B02	see T11P01A05	cp09	7769	Reverse	BBC11	Forward	6974	7771	0.998745	conserved hypothetical protein		TATTGCCTTA--TAGCTTAACC	Not done
T11P01B08	see T11P01A05	cp09	7769	Reverse	BBC11	Forward	6974	7771	0.998745	conserved hypothetical protein		TATTGCCTTA--TAGCTTAACC	Not done
T11P01C02	see T11P01A05	cp09	7769	Reverse	BBC11	Forward	6974	7771	0.997491	conserved hypothetical protein		TATTGCCTTA--TAGCTTAACC	Not done
T11P01C11	see T11P01A05	cp09	7769	Reverse	BBC11	Forward	6974	7771	0.998745	conserved hypothetical protein		TATTGCCTTA--TAGCTTAACC	Not done
T11P01E03	see T11P01A05	cp09	7769	Forward	BBC11	Forward	6974	7771	0.997491	conserved hypothetical protein		TATTGCCTTA--TAGCTTAACC	lp28-1,lp5
T11P01E08	see T11P01A05	cp09	7769	Reverse	BBC11	Forward	6974	7771	0.998745	conserved hypothetical protein		TATTGCCTTA--TAGCTTAACC	Not done
T11P01F01	see T11P01A05	cp09	7769	Reverse	BBC11	Forward	6974	7771	0.998745	conserved hypothetical protein		TATTGCCTTA--TAGCTTAACC	Not done
T11P01G05	see T11P01A05	cp09	7769	Forward	BBC11	Forward	6974	7771	0.997491	conserved hypothetical protein		TATTGCCTTA--TAGCTTAACC	Not done
T11P02A02	see T11P01A05	cp09	7769	Reverse	BBC11	Forward	6974	7771	0.998745	conserved hypothetical protein		TATTGCCTTA--TAGCTTAACC	Not done
T11P02A04	see T11P01A05	cp09	7769	Reverse	BBC11	Forward	6974	7771	0.998745	conserved hypothetical protein		TATTGCCTTA--TAGCTTAACC	Not done
T11P02A06	see T11P01A05	cp09	7769	Forward	BBC11	Forward	6974	7771	0.997491	conserved hypothetical protein		TATTGCCTTA--TAGCTTAACC	Not done
T03TC196		cp09	7782	Reverse	IR BBC11-BBC12	0	7772	7910	0.0797101	Intergenic Region	0	CTTAACCAGT--TAAGCTTAAA		lp5
T09TC458	same site: T09TC458, T10TC086	cp09	7816	Forward	IR BBC11-BBC12	0	7772	7910	0.318841	Intergenic Region	0	ATTTTTGACA--TATACTCCTT	Complete
T10TC086	same site: T09TC458, T10TC086	cp09	7816	Forward	IR BBC11-BBC12	0	7772	7910	0.318841	Intergenic Region	0	ATTTTTGACA--TATACTCCTT	lp5
T11TC224	T11TC224, T11TC251	cp09	7818	Forward	IR BBC11-BBC12	0	7772	7910	0.333333	Intergenic Region	0	TTTTGACATA--TACTCCTTTA	Complete
T11TC251	T11TC224, T11TC251	cp09	7818	Reverse	IR BBC11-BBC12	0	7772	7910	0.34058	Intergenic Region	0	TTTTGACATA--TACTCCTTTA		lp5
T10TC363		cp09	7828	Reverse	IR BBC11-BBC12	0	7772	7910	0.413043	Intergenic Region	0	TACTCCTTTA--TAATCCTTTA		lp5
T11P01B05		cp09	7842	Reverse	IR BBC11-BBC12	0	7772	7910	0.514493	Intergenic Region	0	CCTTTACATT--TATTTATGTA	Not done
T06TC262		cp09	7884	Reverse	IR BBC11-BBC12	0	7772	7910	0.818841	Intergenic Region	0	TCCCAGTCAA--TAGGGGCACT	lp28-1,lp5
T03TC233		cp09	7899	Reverse	IR BBC11-BBC12	0	7772	7910	0.927536	Intergenic Region	0	GCACTGATAC--TATTTGTAAA	Complete
T08TC517		cp09	7920	Reverse	BBC12	Reverse	9203	7911	0.99226	conserved hypothetical protein		GCTATATTGC--TAAGAAAGAA		lp5
T10TC362		cp09	7930	Forward	BBC12	Reverse	9203	7911	0.985294	conserved hypothetical protein		TAAGAAAGAA--TACTTACTAC	lp5
T09TC125		cp09	7937	Reverse	BBC12	Reverse	9203	7911	0.979102	conserved hypothetical protein		GAATACTTAC--TACTTATTGG	lp5
T07TC223		cp09	7941	Forward	BBC12	Reverse	9203	7911	0.97678	conserved hypothetical protein		ACTTACTACT--TATTGGCAAA	cp32-6
T07TC208		cp09	7993	Forward	BBC12	Reverse	9203	7911	0.936533	conserved hypothetical protein		ATTCGGATCA--TAATTAAACA	Complete
T09TC469		cp09	8018	Forward	BBC12	Reverse	9203	7911	0.917183	conserved hypothetical protein		TCTCTAAATT--TATAATTCAC		lp5
T10TC365	T10TC365, T10TC429	cp09	8048	Reverse	BBC12	Reverse	9203	7911	0.893189	conserved hypothetical protein		AGTGGATATT--TATGCATAAT		lp5
T10TC429	T10TC365, T10TC429	cp09	8048	Forward	BBC12	Reverse	9203	7911	0.893963	conserved hypothetical protein		AGTGGATATT--TATGCATAAT	Complete
T04TC142		cp09	8088	Forward	BBC12	Reverse	9203	7911	0.863003	conserved hypothetical protein		GCAGTTCTTT--TATAGGATTT	Complete
T10TC453		cp09	8178	Reverse	BBC12	Reverse	9203	7911	0.79257	conserved hypothetical protein		ACTCAAGATT--TATAGCGGCC		lp5
T05TC606		cp09	8330	Forward	BBC12	Reverse	9203	7911	0.675697	conserved hypothetical protein		TTATTCCCAT--TATGAGATAT		lp5
T08TC621	T08TC621, T08TC700	cp09	8337	Reverse	BBC12	Reverse	9203	7911	0.669505	conserved hypothetical protein		CATTATGAGA--TATTAATAAA		lp28-1
T08TC700	T08TC621, T08TC700	cp09	8337	Reverse	BBC12	Reverse	9203	7911	0.669505	conserved hypothetical protein		CATTATGAGA--TATTAATAAA	lp28-1
T10TC431		cp09	8471	Forward	BBC12	Reverse	9203	7911	0.566563	conserved hypothetical protein		TTAATAGGTT--TATTACCTAT	lp5
T08TC122		cp09	8542	Reverse	BBC12	Reverse	9203	7911	0.510836	conserved hypothetical protein		TGCTTGTACA--TAATATTTGA		lp5
T08TC507		cp09	8561	Reverse	BBC12	Reverse	9203	7911	0.49613	conserved hypothetical protein		AAAAAATATT--TACTACTTAA	lp5
T07TC068		cp09	8640	Reverse	BBC12	Reverse	9203	7911	0.434985	conserved hypothetical protein		TTTTAATCTC--TAATAGTTCT	lp5
T09TC476		cp09	8728	Reverse	BBC12	Reverse	9203	7911	0.366873	conserved hypothetical protein		TTTTTTGAAA--TAGTTATACT	lp21	lp5
T08TC660		cp09	8732	Forward	BBC12	Reverse	9203	7911	0.364551	conserved hypothetical protein		TTGAAATAGT--TATACTTATC	Complete
T08TC184		cp09	8734	Reverse	BBC12	Reverse	9203	7911	0.362229	conserved hypothetical protein		GAAATAGTTA--TACTTATCAA	lp5
T10TC493		cp09	8755	Reverse	BBC12	Reverse	9203	7911	0.345975	conserved hypothetical protein		ACCGTTAGCA--TATTTGTTTT	Complete
T08TC636		cp09	8774	Reverse	BBC12	Reverse	9203	7911	0.331269	conserved hypothetical protein		TTATACAAAA--TATCAATATT	lp5
T09TC244	T09TC244, T09TC315; same site T11TC148	cp09	8846	Forward	BBC12	Reverse	9203	7911	0.276316	conserved hypothetical protein		CCCTTGAGCA--TATATAAATT	lp5
T09TC315	see T09TC244	cp09	8846	Forward	BBC12	Reverse	9203	7911	0.276316	conserved hypothetical protein		CCCTTGAGCA--TATATAAATT	cp32-6,lp5
T11TC148	see T09TC244	cp09	8846	Reverse	BBC12	Reverse	9203	7911	0.275542	conserved hypothetical protein		CCCTTGAGCA--TATATAAATT	Complete
T09TC175		cp09	8850	Reverse	BBC12	Reverse	9203	7911	0.272446	conserved hypothetical protein		TGAGCATATA--TAAATTCTCT	Complete
T07TC186		cp09	8907	Reverse	BBC12	Reverse	9203	7911	0.228328	conserved hypothetical protein		TATTCATCAT--TAAATCTTTT	Complete
T09TC466		cp09	9008	Forward	BBC12	Reverse	9203	7911	0.150929	conserved hypothetical protein		ATATTTCGAT--TAAATCTAAA		lp5
T08TC287		cp09	9033	Forward	BBC12	Reverse	9203	7911	0.131579	conserved hypothetical protein		CTTGACTGCT--TATTCCGGGT	lp5
T08TC140		cp09	9059	Forward	BBC12	Reverse	9203	7911	0.111455	conserved hypothetical protein		TTACCTATCT--TACTTAATTT	lp5
T09TC465		cp09	9223	Reverse	BBC12	Reverse	9203	7911	0.0162539	conserved hypothetical protein		TTCTTATATA--TAAATATATA	cp32-6,lp5
T08TC205		cp09	9229	Reverse	BBC12	Reverse	9203	7911	0.0208978	conserved hypothetical protein		TATATAAATA--TATAGCAAAA	Complete
T06TC390		cp09	9231	Forward	BBC12	Reverse	9203	7911	0.0216718	conserved hypothetical protein		TATAAATATA--TAGCAAAAAC	Not done
T05TC296	same site: T05TC296, T09TC191	cp09	9354	Reverse	BBC12	Reverse	9203	7911	0.117647	conserved hypothetical protein		TGATTATACT--TACGTAGTAA	lp5
T09TC191	same site: T05TC296, T09TC191	cp09	9354	Forward	BBC12	Reverse	9203	7911	0.116873	conserved hypothetical protein		TGATTATACT--TACGTAGTAA	lp38		sequence entered manually; at beginning of cp9 sequence
T09TC321		cp09	9385	Reverse	BBC12	Reverse	9203	7911	0.141641	conserved hypothetical protein		ATATTAATAG--TA		lp5	short sequence; 2 mismatches near end of sequence
T10TC471		cp26	44	Reverse	BBB01	Forward	16	324	0.0941558	acylphosphatase		AAGAAGGTAA--TAATGTATAA	lp28-1,lp5
T08TC474	same site: T08TC474, T09TC018	cp26	49	Forward	BBB01	Forward	16	324	0.107143	acylphosphatase		GGTAATAATG--TATAAACAAC	Complete
T09TC018	same site: T08TC474, T09TC018	cp26	49	Reverse	BBB01	Forward	16	324	0.11039	acylphosphatase		GGTAATAATG--TATAAACAAC	Complete
T05TC492		cp26	51	Reverse	BBB01	Forward	16	324	0.116883	acylphosphatase		TAATAATGTA--TAAACAACAA	Complete
T08TC144	T08TC144, T08TC172	cp26	66	Reverse	BBB01	Forward	16	324	0.165584	acylphosphatase		AACAATATTT--TATTTCTGGC	lp5
T08TC172	see T08TC144	cp26	66	Reverse	BBB01	Forward	16	324	0.165584	acylphosphatase		AACAATATTT--TATTTCTGGC	Complete
T04TC169	same site: T04TC169, T10P01B08	cp26	195	Reverse	BBB01	Forward	16	324	0.584416	acylphosphatase		TCTTTAATAC--TAAAGAACAA	cp32-9
T10P01B08	same site: T04TC169, T10P01B08	cp26	195	Reverse	BBB01	Forward	16	324	0.584416	acylphosphatase		TCTTTAATAC--TAAAGAACAA	Not done
T06TC458		cp26	237	Reverse	BBB01	Forward	16	324	0.720779	acylphosphatase		TAAATGGGAA--TAAGTATTCA	Not done
T04TC131		cp26	275	Reverse	BBB01	Forward	16	324	0.844156	acylphosphatase		AAAATAGTTT--TAGATGAAAA	lp5	cp9
T08TC473	same site T08TC473, T11TC153	cp26	347	Forward	BBB02	Reverse	751	308	0.911964	Conserved hypothetical protein		GTTTAACAAG--TACCTTAACC	cp9,lp5
T11TC153	same site T08TC473, T11TC153	cp26	347	Reverse	BBB02	Reverse	751	308	0.909707	Conserved hypothetical protein		GTTTAACAAG--TACCTTAACC	lp5
T10TC383		cp26	352	Reverse	BBB02	Reverse	751	308	0.89842	Conserved hypothetical protein		ACAAGTACCT--TAACCTTATT	lp5
T09TC523		cp26	373	Forward	BBB02	Reverse	751	308	0.853273	Conserved hypothetical protein		TTTGGTTTAA--TATTGTGCAC		lp5
T06TC274	T06TC274, T06TC296	cp26	384	Reverse	BBB02	Reverse	751	308	0.826185	Conserved hypothetical protein		ATTGTGCACA--TAAGAATTGT	lp5
T06TC296	see T06TC274	cp26	384	Reverse	BBB02	Reverse	751	308	0.826185	Conserved hypothetical protein		ATTGTGCACA--TAAGAATTGT	lp5
T03TC018	same site: T03TC018, T08TC370, T11TC235	cp26	402	Reverse	BBB02	Reverse	751	308	0.785553	Conserved hypothetical protein		GTTATTCTTA--TAGCAAGACA	lp5
T08TC370	same site: T03TC018, T08TC370, T11TC235	cp26	402	Reverse	BBB02	Reverse	751	308	0.785553	Conserved hypothetical protein		GTTATTCTTA--TAGCAAGACA	cp32-7,lp28-1
T11TC235	same site: T03TC018, T08TC370, T11TC235	cp26	402	Forward	BBB02	Reverse	751	308	0.78781	Conserved hypothetical protein		GTTATTCTTA--TAGCAAGACA		lp5
T03TC076		cp26	553	Reverse	BBB02	Reverse	751	308	0.444695	Conserved hypothetical protein		CTGCACGAAA--TAAAACTACC	lp21	lp5
T04TC198	same site: T04TC198, T06TC263	cp26	758	Reverse	IR BBB02-BBB03	0	752	836	0.0833333	Intergenic Region	0	TCATACAAAT--TATATAATAT	cp9,lp28-1
T06TC263	same site: T04TC198, T06TC263	cp26	758	Forward	IR BBB02-BBB03	0	752	836	0.0714286	Intergenic Region	0	TCATACAAAT--TATATAATAT	cp9,lp21
T05TC422		cp26	762	Forward	IR BBB02-BBB03	0	752	836	0.119048	Intergenic Region	0	ACAAATTATA--TAATATCTTA	lp28-1	lp5
T08TC298		cp26	922	Reverse	BBB03	Reverse	2186	837	0.936249	hypothetical protein		TTTAAAAGCT--TTGCGAATTT	cp9, lp5	lp28-3, lp36	Possible genome sequence error: 923 = AA
T03TC315	same site: T03TC315, T08TC690	cp26	2259	Reverse	IR BBB03-BBB04	0	2187	2475	0.253472	Intergenic Region	0	AATATGCTTA--TATATTAAAT	lp5
T08TC690	same site: T03TC315, T08TC690	cp26	2259	Forward	IR BBB03-BBB04	0	2187	2475	0.25	Intergenic Region	0	AATATGCTTA--TATATTAAAT	lp5
T11TC322		cp26	2274	Forward	IR BBB03-BBB04	0	2187	2475	0.302083	Intergenic Region	0	TAAATTAAAT--TATATAATAT	Not done
T03TC232		cp26	2278	Forward	IR BBB03-BBB04	0	2187	2475	0.315972	Intergenic Region	0	TTAAATTATA--TAATATGTAC	cp9,lp5
T04TC379		cp26	2288	Forward	IR BBB03-BBB04	0	2187	2475	0.350694	Intergenic Region	0	TAATATGTAC--TAGGATGCAT	lp5
T11TC387		cp26	2348	Forward	IR BBB03-BBB04	0	2187	2475	0.559028	Intergenic Region	0	TTTATTAATT--TAAATCATAA	Not done
T06TC304	same site T06TC304, T11TC197	cp26	2420	Reverse	IR BBB03-BBB04	0	2187	2475	0.8125	Intergenic Region	0	TATTTATAAA--TAGCTCTCTA	Complete
T11TC197	same site T06TC304, T11TC197	cp26	2420	Reverse	IR BBB03-BBB04	0	2187	2475	0.8125	Intergenic Region	0	TATTTATAAA--TAGCTCTCTA	Complete
T09TC231		cp26	2517	Forward	BBB04	Reverse	3807	2476	0.969196	PTS system IIC chitibiose transporter protein chbC	chbC	TCATACGCTT--TAATAAAGGG	cp9,lp5
T07TC085		cp26	2535	Reverse	BBB04	Reverse	3807	2476	0.954921	PTS system IIC chitibiose transporter protein chbC	chbC	GGTAAATACA--TAAATACTGA	cp9,lp5
T06TC249		cp26	2539	Reverse	BBB04	Reverse	3807	2476	0.951916	PTS system IIC chitibiose transporter protein chbC	chbC	AATACATAAA--TACTGAAATA	lp5	lp28-1
T05TC282		cp26	2658	Forward	BBB04	Reverse	3807	2476	0.863261	PTS system IIC chitibiose transporter protein chbC	chbC	ACCCTTTCAA--TAATTCCAAA	cp9,lp5
T06TC214		cp26	2692	Forward	BBB04	Reverse	3807	2476	0.837716	PTS system IIC chitibiose transporter protein chbC	chbC	ATGCAACAAT--TATATTAAAT	cp9,lp5
T09TC454		cp26	2697	Reverse	BBB04	Reverse	3807	2476	0.833208	PTS system IIC chitibiose transporter protein chbC	chbC	ACAATTATAT--TAAATATAGG	Complete
T04TC227		cp26	2766	Forward	BBB04	Reverse	3807	2476	0.782119	PTS system IIC chitibiose transporter protein chbC	chbC	CCGAACATAA--TAGGTTCATT	lp38,lp21
T07TC055		cp26	2853	Forward	BBB04	Reverse	3807	2476	0.716754	PTS system IIC chitibiose transporter protein chbC	chbC	ATCATAGCAA--TAGCAAGCCC	Complete
T09TC044		cp26	2886	Reverse	BBB04	Reverse	3807	2476	0.69121	PTS system IIC chitibiose transporter protein chbC	chbC	GCACCACCAA--TATACACAAA	Complete
T06TC522		cp26	2961	Forward	BBB04	Reverse	3807	2476	0.635612	PTS system IIC chitibiose transporter protein chbC	chbC	GCCCTAATAT--TAGAATCAAG	Not done
T03TC046		cp26	3040	Reverse	BBB04	Reverse	3807	2476	0.575507	PTS system IIC chitibiose transporter protein chbC	chbC	AAAACCATAA--TATATGAACA	Complete
T11TC232		cp26	3342	Reverse	BBB04	Reverse	3807	2476	0.34861	PTS system IIC chitibiose transporter protein chbC	chbC	CCTTGAGCAC--TAAAATATCT	Complete
T08P01C04		cp26	3501	Reverse	BBB04	Reverse	3807	2476	0.229151	PTS system IIC chitibiose transporter protein chbC	chbC	TTATAATGAT--TAGATAAGTT	lp21,lp5
T09TC043		cp26	3543	Reverse	BBB04	Reverse	3807	2476	0.197596	PTS system IIC chitibiose transporter protein chbC	chbC	AATATAGACA--TAATACCCAT	lp5
T11TC239		cp26	3685	Forward	BBB04	Reverse	3807	2476	0.0916604	PTS system IIC chitibiose transporter protein chbC	chbC	AACCAACTAT--TAAAAAGGGC	lp5
T10TC023		cp26	3859	Forward	IR BBB04-BBB05	0	3808	4083	0.185455	Intergenic Region	0	CAATATTTAT--TATAATATAA	lp28-1	lp5
T05TC295		cp26	4229	Reverse	BBB05	Forward	4084	4431	0.420749	PTS system IIA chitibiose transporter protein chbA	chbA	GAGCTTACTA--TACAAGAAAG	cp9,lp5
T11TC406		cp26	4352	Forward	BBB05	Forward	4084	4431	0.772334	PTS system IIA chitibiose transporter protein chbA	chbA	GAAGATCATT--TAATGTCTGC	Not done
T09TC387		cp26	4456	Forward	BBB06	Forward	4440	4757	0.0504732	PTS system IIB chitibiose transporter protein chbB	chbB	ATACTACTTG--TATGTGGAGC		lp5
T08TC580		cp26	4481	Reverse	BBB06	Forward	4440	4757	0.132492	PTS system IIB chitibiose transporter protein chbB	chbB	TGTCCACAAG--TATGCTGGTA	lp5
T04TC080		cp26	4594	Forward	BBB06	Forward	4440	4757	0.485804	PTS system IIB chitibiose transporter protein chbB	chbB	GACGTTGTTT--TACTTGCACC	Complete
T02P01C06		cp26	4714	Forward	BBB06	Forward	4440	4757	0.864353	PTS system IIB chitibiose transporter protein chbB	chbB	AAAAAGTAT--TACAACTTGCA	lp5
T09TC519		cp26	4810	Forward	BBB07	Forward	4769	5866	0.0373747	putative alpha3-beta1 integrin-binding outer surface protein		ATGTAAGTCC--TAAAAATAAA	Complete
T07TC077		cp26	4885	Forward	BBB07	Forward	4769	5866	0.105743	putative alpha3-beta1 integrin-binding outer surface protein		CTTTGCTCTA--TATTAACGGA	lp5
T11TC456		cp26	4957	Reverse	BBB07	Forward	4769	5866	0.172288	putative alpha3-beta1 integrin-binding outer surface protein		TGAAACCTAT--TATTGACGTA	Not done		In cp26 plasmid analysis amplicon
T03TC045	same site: T03TC045, T07TC184	cp26	5142	Forward	BBB07	Forward	4769	5866	0.340018	putative alpha3-beta1 integrin-binding outer surface protein		CAACTTAATA--TAAGCAATAT	lp5		In cp26 plasmid analysis amplicon
T07TC184	same site: T03TC045, T07TC184	cp26	5142	Forward	BBB07	Forward	4769	5866	0.340018	putative alpha3-beta1 integrin-binding outer surface protein		CAACTTAATA--TAAGCAATAT	Complete		In cp26 plasmid analysis amplicon
T10TC543		cp26	5161	Forward	BBB07	Forward	4769	5866	0.357338	putative alpha3-beta1 integrin-binding outer surface protein		TAAATAAACA--TATTGATACA	Complete		In cp26 plasmid analysis amplicon
T05TC064		cp26	5215	Forward	BBB07	Forward	4769	5866	0.406563	putative alpha3-beta1 integrin-binding outer surface protein		TTGGGTGTCA--TAATTTTTAT	Complete		In cp26 plasmid analysis amplicon
T08TC307		cp26	5234	Reverse	BBB07	Forward	4769	5866	0.424795	putative alpha3-beta1 integrin-binding outer surface protein		TCCTCACAAA--TATACAGGAC	lp5		In cp26 plasmid analysis amplicon
T07TC472		cp26	5235	Reverse	BBB07	Forward	4769	5866	0.425706	putative alpha3-beta1 integrin-binding outer surface protein		CCTCACAAAT--ATACAGGACT	Complete		anomolous transposition event. In cp26 plasmid analysis amplicon
T03TC160		cp26	5383	Forward	BBB07	Forward	4769	5866	0.559708	putative alpha3-beta1 integrin-binding outer surface protein		TAGAATCACA--TAGATCTAAA	cp9,lp5
T08TC478		cp26	5395	Reverse	BBB07	Forward	4769	5866	0.571559	putative alpha3-beta1 integrin-binding outer surface protein		GATCTAAAGA--TATAGAAACC	Complete
T04TC414		cp26	5437	Reverse	BBB07	Forward	4769	5866	0.609845	putative alpha3-beta1 integrin-binding outer surface protein		AAGGAATAGA--TACAGTCCTA	Complete
T06TC316	same site: T06TC316, T10TC234	cp26	5697	Reverse	BBB07	Forward	4769	5866	0.846855	putative alpha3-beta1 integrin-binding outer surface protein		GGAGACATCC--TAATAGATTC	lp28-1	cp9
T10TC234	same site: T06TC316, T10TC234	cp26	5697	Reverse	BBB07	Forward	4769	5866	0.846855	putative alpha3-beta1 integrin-binding outer surface protein		GGAGACATCC--TAATAGATTC	Complete
T07TC151		cp26	5742	Reverse	BBB07	Forward	4769	5866	0.887876	putative alpha3-beta1 integrin-binding outer surface protein		GAACTTCAAA--TAGCACTAAA	lp5
T05TC049		cp26	5810	Reverse	BBB07	Forward	4769	5866	0.949863	putative alpha3-beta1 integrin-binding outer surface protein		TGATGAAATA--TATCTACTTG	cp32-7,lp21
T06TC140		cp26	5814	Forward	BBB07	Forward	4769	5866	0.952598	putative alpha3-beta1 integrin-binding outer surface protein		GAAATATATC--TACTTGAAAA	lp21,lp5
T08TC213		cp26	5860	Reverse	BBB07	Forward	4769	5866	0.995442	putative alpha3-beta1 integrin-binding outer surface protein		TAATAGAAAA--TAAATAAATG	lp5
T10TC174		cp26	5873	Reverse	IR BBB07-BBB08	0	5867	5887	0.35	Intergenic Region	0	ATAAATGCAC--TAATAAAAAG	lp5
T08TC308		cp26	5922	Forward	BBB08	Reverse	6517	5888	0.945946	lipoprotein, putative		TTTAAGGACA--TAATAATAAA	lp5
T04TC170	same site: T04TC170, T07TC306	cp26	5925	Reverse	BBB08	Reverse	6517	5888	0.939587	lipoprotein, putative		AAGGACATAA--TAATAAACAG		lp28-3,lp38
T07TC306	same site: T04TC170, T07TC306	cp26	5925	Forward	BBB08	Reverse	6517	5888	0.941176	lipoprotein, putative		AAGGACATAA--TAATAAACAG	lp28-1,lp5	lp17
T08TC531		cp26	5935	Reverse	BBB08	Reverse	6517	5888	0.923688	lipoprotein, putative		TAATAAACAG--TAATGTAAGA	lp5
T06TC136		cp26	5940	Reverse	BBB08	Reverse	6517	5888	0.915739	lipoprotein, putative		AACAGTAATG--TAAGACTCTC	lp5
T09TC179		cp26	6142	Forward	BBB08	Reverse	6517	5888	0.596184	lipoprotein, putative		TTGTCAAAAC--TATCAATACC	Complete
T10TC462	same site T10TC462, T11TC010	cp26	6457	Reverse	BBB08	Reverse	6517	5888	0.0937997	lipoprotein, putative		GAAGAAACAC--TAATATTGCA		lp5
T11TC010	same site T10TC462, T11TC010	cp26	6457	Forward	BBB08	Reverse	6517	5888	0.0953895	lipoprotein, putative		GAAGAAACAC--TAATATTGCA	lp5
T04TC087		cp26	6536	Reverse	IR BBB08-BBB09	0	6518	6676	0.120253	Intergenic Region	0	TCTCATTAAA--TATACTAAAA	lp5
T04TC451		cp26	6580	Forward	IR BBB08-BBB09	0	6518	6676	0.392405	Intergenic Region	0	GCATAAAAAG--TATAACAAAT	lp28-1,lp5
T10TC256		cp26	6622	Forward	IR BBB08-BBB09	0	6518	6676	0.658228	Intergenic Region	0	AGAATATAAT--TATTGCACTA	Complete
T08TC506		cp26	6769	Forward	BBB09	Forward	6677	7714	0.0887175	lipoprotein, putative		ATACAAACCA--TAAATTAGGA	Complete
T09TC513		cp26	6846	Reverse	BBB09	Forward	6677	7714	0.163934	lipoprotein, putative		ATTGTGGGAG--TATACAACCC		lp5
T09TC494		cp26	6848	Forward	BBB09	Forward	6677	7714	0.164899	lipoprotein, putative		TGTGGGAGTA--TACAACCCTT	Complete
T08TC268		cp26	6956	Reverse	BBB09	Forward	6677	7714	0.27001	lipoprotein, putative		AAAAATTAAT--TATTCAAAAT		lp38
T03TC124		cp26	6965	Forward	BBB09	Forward	6677	7714	0.277724	lipoprotein, putative		TTATTCAAAA--TATAAAGCAG	Complete
T09TC136		cp26	7041	Reverse	BBB09	Forward	6677	7714	0.351977	lipoprotein, putative		TCAAGAGATC--TATTAACCTA	Complete
T05TC249		cp26	7044	Reverse	BBB09	Forward	6677	7714	0.35487	lipoprotein, putative		AGAGATCTAT--TAACCTACAT	lp5
T05TC442	same site: T05TC442, T06TC111, T07TC124, T08TC022, T09TC502	cp26	7151	Reverse	BBB09	Forward	6677	7714	0.458052	lipoprotein, putative		TATTTTAGCA--TATATAACAG	lp5
T06TC111	same site: T05TC442, T06TC111, T07TC124, T08TC022, T09TC502	cp26	7151	Forward	BBB09	Forward	6677	7714	0.457088	lipoprotein, putative		TATTTTAGCA--TATATAACAG	lp5
T07TC124	same site: T05TC442, T06TC111, T07TC124, T08TC022, T09TC502	cp26	7151	Forward	BBB09	Forward	6677	7714	0.457088	lipoprotein, putative		TATTTTAGCA--TATATAACAG	lp5
T08TC022	same site: T05TC442, T06TC111, T07TC124, T08TC022, T09TC502	cp26	7151	Reverse	BBB09	Forward	6677	7714	0.458052	lipoprotein, putative		TATTTTAGCA--TATATAACAG		lp5
T09TC502	same site: T05TC442, T06TC111, T07TC124, T08TC022, T09TC502	cp26	7151	Reverse	BBB09	Forward	6677	7714	0.458052	lipoprotein, putative		TATTTTAGCA--TATATAACAG	Complete
T10P01D03	same site T10P01D03, T10TC515	cp26	7256	Reverse	BBB09	Forward	6677	7714	0.559306	lipoprotein, putative		TAAAACAGAA--TATAATGAAA	Not done
T10TC515	same site T10P01D03, T10TC515	cp26	7256	Reverse	BBB09	Forward	6677	7714	0.559306	lipoprotein, putative		TAAAACAGAA--TATAATGAAA		lp5
T03TC186	same site T03TC186, T05TC491	cp26	7277	Forward	BBB09	Forward	6677	7714	0.578592	lipoprotein, putative		AGAGGATTAT--TACATCTACA	Complete
T05TC491	see T03TC186	cp26	7277	Reverse	BBB09	Forward	6677	7714	0.579556	lipoprotein, putative		AGAGGATTAT--TACATCTACA	cp32-7,lp5
T11TC178		cp26	7346	Forward	BBB09	Forward	6677	7714	0.64513	lipoprotein, putative		TTACGAAACA--TTTGTTATAG	cp9,lp5		anomolous transposition event
T04TC308		cp26	7361	Forward	BBB09	Forward	6677	7714	0.659595	lipoprotein, putative		TATAGCAAAT--TATTACCCCT	lp5
T11TC281		cp26	7521	Reverse	BBB09	Forward	6677	7714	0.814851	lipoprotein, putative		AAAGAAACAT--TAAATATAGT	Complete
T07TC312		cp26	7632	Forward	BBB09	Forward	6677	7714	0.920926	lipoprotein, putative		ACATTTGAAA--TATATAAACC		lp17
T10TC255		cp26	7705	Reverse	BBB09	Forward	6677	7714	0.992285	lipoprotein, putative		CAAGTAGGCA--TAAATTTTAA	cp9,lp5
T06TC130	same site: T06TC130, T08TC105	cp26	7727	Reverse	IR BBB09-BBB10	0	7715	7835	0.108333	Intergenic Region	0	TATTGACTCT--TACACATTTG	Complete
T08TC105	same site: T06TC130, T08TC105	cp26	7727	Forward	IR BBB09-BBB10	0	7715	7835	0.1	Intergenic Region	0	TATTGACTCT--TACACATTTG	cp9	lp5
T06TC031		cp26	9315	Reverse	BBB12	Forward	9275	10036	0.0538765	paralogous family 32 protein	PF32	ATTGCATCAA--TAAAAGGGGG	lp28-1,lp5
T05TC164		cp26	9390	Reverse	BBB12	Forward	9275	10036	0.152431	paralogous family 32 protein	PF32	AATAAAATAT--TATTAATAGA	cp32-7,cp9,lp5
T05TC277		cp26	9418	Forward	BBB12	Forward	9275	10036	0.187911	paralogous family 32 protein	PF32	CACAAGCAAG--TAGTACAAGT	lp28-2
T03TC311		cp26	9478	Reverse	BBB12	Forward	9275	10036	0.268068	paralogous family 32 protein	PF32	AAGATATCAA--TATATATAAA	lp5
T04TC184		cp26	9484	Reverse	BBB12	Forward	9275	10036	0.275953	paralogous family 32 protein	PF32	TCAATATATA--TAAAGTTCTT	lp28-2,lp5
T08TC438		cp26	9510	Forward	BBB12	Forward	9275	10036	0.308804	paralogous family 32 protein	PF32	GAAATAGACA--TAGAAAATTC	cp9,lp5
T09TC319		cp26	9697	Reverse	BBB12	Forward	9275	10036	0.555848	paralogous family 32 protein	PF32	GCTTGCTCAA--TAATAGTTTA	Complete
T04TC083		cp26	9705	Reverse	BBB12	Forward	9275	10036	0.56636	paralogous family 32 protein	PF32	AATAATAGTT--TAATCATCTC	Complete
T04TC232		cp26	9859	Reverse	BBB12	Forward	9275	10036	0.768725	paralogous family 32 protein	PF32	AAAATATTGA--TAAAGAACTT	cp9,lp5
T10TC117		cp26	10065	Reverse	IR BBB12-BBB13	0	10037	10103	0.439394	Intergenic Region	0	GTTCCATATG--GAACTAATTT	Complete		anomolous transposition event
T10TC205		cp26	10356	Reverse	BBB13	Forward	10104	10652	0.461679	paralogous family 49 protein	PF49	AACTACTGTT--TATAGATATA	lp5
T08TC251		cp26	10358	Reverse	BBB13	Forward	10104	10652	0.465328	paralogous family 49 protein	PF49	CTACTGTTTA--TAGATATATT	lp28-3, lp36, cp9, lp5
T03TC198		cp26	10431	Forward	BBB13	Forward	10104	10652	0.596715	paralogous family 49 protein	PF49	AAAAGGAATA--TATTATGCTA	cp9
T11TC095		cp26	10434	Forward	BBB13	Forward	10104	10652	0.60219	paralogous family 49 protein	PF49	AGGAATATAT--TATGCTATGC	lp5
T10TC394		cp26	10468	Forward	BBB13	Forward	10104	10652	0.664234	paralogous family 49 protein	PF49	AATGAGACTA--TAGTTAATTC	lp5
T06TC054		cp26	10502	Reverse	BBB13	Forward	10104	10652	0.728102	paralogous family 49 protein	PF49	ATAGATCACT--TAGGCTAAAA	lp5
T07TC245		cp26	10541	Forward	BBB13	Forward	10104	10652	0.797445	paralogous family 49 protein	PF49	TTAATTTTTA--TAAATCAAAT		lp17,lp5
T04TC002		cp26	10664	Forward	IR BBB13-BBB14	0	10653	10919	0.0413534	Intergenic Region	0	ATTCTATATT--TATAAAATAG	Complete
T10TC351	same site T10TC351, T11TC398	cp26	10841	Forward	IR BBB13-BBB14	0	10653	10919	0.706767	Intergenic Region	0	AAAATAGGAA--TAATATAGCC		lp5
T11TC398	see T10TC351	cp26	10841	Forward	IR BBB13-BBB14	0	10653	10919	0.706767	Intergenic Region	0	AAAATAGGAA--TAATATAGCC	Not done
T08P02H03		cp26	10898	Reverse	IR BBB13-BBB14	0	10653	10919	0.924812	Intergenic Region	0	AAACTGAAAA--TAAATACCAA	Not done
T11TC128		cp26	10962	Forward	BBB14	Reverse	11417	10920	0.915493	conserved hypothetical protein		CAACCATTAC--TAGAAAGTCC	lp5
T11TC505		cp26	10995	Forward	BBB14	Reverse	11417	10920	0.849095	conserved hypothetical protein		TTTTCAAGCT--TAAATCTTCT	Not done
T09TC230		cp26	11057	Forward	BBB14	Reverse	11417	10920	0.724346	conserved hypothetical protein		TCTTCTTCTT--TAATCATCCT	cp9,lp5
T11TC461		cp26	11143	Forward	BBB14	Reverse	11417	10920	0.551308	conserved hypothetical protein		ATCTCTTTTG--TAGCTTACTT	Not done
T03TC057	same site T03TC057, T10TC531	cp26	11184	Reverse	BBB14	Reverse	11417	10920	0.466801	conserved hypothetical protein		CCAGCAGCAA--TAAAGGATTC	cp9,lp5
T10TC531	same site T03TC057, T10TC531	cp26	11184	Reverse	BBB14	Reverse	11417	10920	0.466801	conserved hypothetical protein		CCAGCAGCAA--TAAAGGATTC	lp5
T06TC154		cp26	11204	Reverse	BBB14	Reverse	11417	10920	0.426559	conserved hypothetical protein		TGTTCTGTTA--TACTATGGTT	lp38,cp9
T06TC562	same site: T06TC562, T11TC324	cp26	11232	Reverse	BBB14	Reverse	11417	10920	0.370221	conserved hypothetical protein		TTGTGTATAA--TACTATTTTA	Not done
T11TC324	same site: T06TC562, T11TC324	cp26	11232	Forward	BBB14	Reverse	11417	10920	0.372233	conserved hypothetical protein		TTGTGTATAA--TACTATTTTA	Not done
T11TC500		cp26	11240	Reverse	BBB14	Reverse	11417	10920	0.354125	conserved hypothetical protein		AATACTATTT--TAGTTATTCC	Not done
T11TC032		cp26	11302	Forward	BBB14	Reverse	11417	10920	0.231388	conserved hypothetical protein		TAAGCTTTGG--TATATTCTAA	lp38,cp9
T11TC304		cp26	11304	Forward	BBB14	Reverse	11417	10920	0.227364	conserved hypothetical protein		AGCTTTGGTA--TATTCTAAAT	Not done
T07TC044		cp26	11361	Reverse	BBB14	Reverse	11417	10920	0.110664	conserved hypothetical protein		TGCAAGATAT--TAATAAAAAA	Complete
T05TC238		cp26	11407	Forward	BBB14	Reverse	11417	10920	0.0201207	conserved hypothetical protein		TTGATTTTGA--TATAATATCA	cp32-7,cp9
T10TC012		cp26	11409	Forward	BBB14	Reverse	11417	10920	0.0160966	conserved hypothetical protein		GATTTTGATA--TAATATCATA	lp28-1	lp5
T07TC258	same site: T07TC258, T08TC291	cp26	11412	Forward	BBB14	Reverse	11417	10920	0.0100604	conserved hypothetical protein		TTTGATATAA--TATCATATTC		lp5
T08TC291	same site: T07TC258, T08TC291	cp26	11412	Reverse	BBB14	Reverse	11417	10920	0.00804829	conserved hypothetical protein		TTTGATATAA--TATCATATTC	Complete
T11TC066		cp26	11458	Reverse	IR BBB14-BBB15	0	11418	11635	0.18894	Intergenic Region	0	CTAGTGAACA--TAATAATATA	lp5
T10TC538		cp26	11461	Forward	IR BBB14-BBB15	0	11418	11635	0.198157	Intergenic Region	0	GTGAACATAA--TAATATATTT	Complete
T07TC374		cp26	11466	Forward	IR BBB14-BBB15	0	11418	11635	0.221198	Intergenic Region	0	CATAATAATA--TATTTTTTAT	Complete
T11TC530		cp26	11641	Reverse	BBB15	Forward	11636	11740	0.0576923	hypothetical protein		AGTTCTTGTA--TAGAACTTTT	Complete
T10TC369		cp26	11814	Reverse	IR BBB15-BBB16	0	11741	12013	0.272059	Intergenic Region	0	TTTATATGTA--TAATAACCAT	Complete
T10TC274		cp26	11838	Reverse	IR BBB15-BBB16	0	11741	12013	0.360294	Intergenic Region	0	GAGCAAGCAA--TAAAAGATTA	lp5
T04TC370		cp26	11909	Reverse	IR BBB15-BBB16	0	11741	12013	0.621324	Intergenic Region	0	AATTTTATTT--TAGAATAATT	lp5
T11TC457		cp26	11965	Forward	IR BBB15-BBB16	0	11741	12013	0.823529	Intergenic Region	0	TCATATATAA--TAAAATATAG	Not done
T10P01A05	T10P01A05, T10P01A06; same site T10TC464	cp26	12112	Reverse	BBB16	Forward	12014	13606	0.0615578	oligopeptide ABC transporter, periplasmic binding protein	oppAIV	AATTGGTTTT--TAAGCTAAAT	Complete
T10P01A06	see T10P01A05	cp26	12112	Reverse	BBB16	Forward	12014	13606	0.0615578	oligopeptide ABC transporter, periplasmic binding protein	oppAIV	AATTGGTTTT--TAAGCTAAAT	Not done
T10TC464	see T10P01A05	cp26	12112	Forward	BBB16	Forward	12014	13606	0.0615578	oligopeptide ABC transporter, periplasmic binding protein	oppAIV	AATTGGTTTT--TAAGCTAAAT	Complete
T08TC532		cp26	12121	Reverse	BBB16	Forward	12014	13606	0.0678392	oligopeptide ABC transporter, periplasmic binding protein	oppAIV	TTAAGCTAAA--TATTGGAAGT	Complete
T09TC358		cp26	12156	Reverse	BBB16	Forward	12014	13606	0.0898241	oligopeptide ABC transporter, periplasmic binding protein	oppAIV	GATGCTCAAT--TAATAAACGA	Complete
T06TC037		cp26	12287	Forward	BBB16	Forward	12014	13606	0.171482	oligopeptide ABC transporter, periplasmic binding protein	oppAIV	CGGAGTAGTT--TATACGTTTC	Complete
T09TC467		cp26	12307	Forward	BBB16	Forward	12014	13606	0.184045	oligopeptide ABC transporter, periplasmic binding protein	oppAIV	ATTTAAGAGA--TAATCTTGTT	lp5	cp9
T10TC017		cp26	12337	Forward	BBB16	Forward	12014	13606	0.202889	oligopeptide ABC transporter, periplasmic binding protein	oppAIV	GAGTTTCCAT--TACTGCCGAA	lp5
T08TC390		cp26	12403	Forward	BBB16	Forward	12014	13606	0.244347	oligopeptide ABC transporter, periplasmic binding protein	oppAIV	CATCTTTTGT--TAACATGATT	cp9,lp5
T06TC542		cp26	12540	Forward	BBB16	Forward	12014	13606	0.330402	oligopeptide ABC transporter, periplasmic binding protein	oppAIV	TATTTTCTTG--ATATGTTAGT	Not done		anomolous transposition event
T09TC460		cp26	12694	Reverse	BBB16	Forward	12014	13606	0.427764	oligopeptide ABC transporter, periplasmic binding protein	oppAIV	AAAAGAATAA--TAAATATTAT	cp32-1
T04TC343		cp26	12698	Reverse	BBB16	Forward	12014	13606	0.430276	oligopeptide ABC transporter, periplasmic binding protein	oppAIV	GAATAATAAA--TATTATAATT	cp9,lp21
T05P01C03	T05P01C03, T05P01D02; same site T10TC340	cp26	12730	Forward	BBB16	Forward	12014	13606	0.449749	oligopeptide ABC transporter, periplasmic binding protein	oppAIV	TTCTTGACAG--TATTATATTT	Not done
T05P01D02	T05P01C03, T05P01D02; same site T10TC340	cp26	12730	Forward	BBB16	Forward	12014	13606	0.449749	oligopeptide ABC transporter, periplasmic binding protein	oppAIV	TTCTTGACAG--TATTATATTT	Complete
T10TC340	T05P01C03, T05P01D02; same site T10TC340	cp26	12730	Forward	BBB16	Forward	12014	13606	0.449749	oligopeptide ABC transporter, periplasmic binding protein	oppAIV	TTCTTGACAG--TATTATATTT		lp5
T09TC457		cp26	12751	Reverse	BBB16	Forward	12014	13606	0.463568	oligopeptide ABC transporter, periplasmic binding protein	oppAIV	TTGTCACAGA--TAATAGCATT		lp5
T08TC465		cp26	12767	Forward	BBB16	Forward	12014	13606	0.47299	oligopeptide ABC transporter, periplasmic binding protein	oppAIV	CATTACAGCT--TATAATATGT	lp5	lp28-1
T06TC382		cp26	12780	Forward	BBB16	Forward	12014	13606	0.481156	oligopeptide ABC transporter, periplasmic binding protein	oppAIV	AATATGTATT--TAAATGATGA	Not done
T05TC419		cp26	12829	Forward	BBB16	Forward	12014	13606	0.511935	oligopeptide ABC transporter, periplasmic binding protein	oppAIV	CAGATTTGCT--TAAGGATCTT	Complete
T08TC295		cp26	12871	Forward	BBB16	Forward	12014	13606	0.538317	oligopeptide ABC transporter, periplasmic binding protein	oppAIV	CAATGGGTAT--TAATTCAACC	lp5
T08TC396		cp26	12991	Reverse	BBB16	Forward	12014	13606	0.614322	oligopeptide ABC transporter, periplasmic binding protein	oppAIV	TTCTTAATGA--TAGTTCTATT	cp9	lp28-3, lp36
T05TC002	same site: T05TC002, T07TC412, T09TC166	cp26	13147	Reverse	BBB16	Forward	12014	13606	0.712312	oligopeptide ABC transporter, periplasmic binding protein	oppAIV	TAAAGTACAA--TACAAGTGAT	lp5	lp28-1
T07TC412	same site: T05TC002, T07TC412, T09TC166	cp26	13147	Forward	BBB16	Forward	12014	13606	0.711683	oligopeptide ABC transporter, periplasmic binding protein	oppAIV	TAAAGTACAA--TACAAGTGAT	cp32-6,cp9
T09TC166	same site: T05TC002, T07TC412, T09TC166	cp26	13147	Reverse	BBB16	Forward	12014	13606	0.712312	oligopeptide ABC transporter, periplasmic binding protein	oppAIV	TAAAGTACAA--TACAAGTGAT	lp5
T08TC463		cp26	13247	Reverse	BBB16	Forward	12014	13606	0.775126	oligopeptide ABC transporter, periplasmic binding protein	oppAIV	ATGGTCAACA--TATATAAATA	lp5
T10TC263		cp26	13249	Forward	BBB16	Forward	12014	13606	0.775754	oligopeptide ABC transporter, periplasmic binding protein	oppAIV	GGTCAACATA--TATAAATAGT	lp21,lp5
T09TC429		cp26	13251	Forward	BBB16	Forward	12014	13606	0.77701	oligopeptide ABC transporter, periplasmic binding protein	oppAIV	TCAACATATA--TAAATAGTAG	Complete
T04TC381	same site T04TC381, T09TC478	cp26	13255	Forward	BBB16	Forward	12014	13606	0.779523	oligopeptide ABC transporter, periplasmic binding protein	oppAIV	CATATATAAA--TAGTAGAGTA	cp9	lp5
T09TC478	see T04TC381	cp26	13255	Forward	BBB16	Forward	12014	13606	0.779523	oligopeptide ABC transporter, periplasmic binding protein	oppAIV	CATATATAAA--TAGTAGAGTA	Complete
T07TC225		cp26	13274	Reverse	BBB16	Forward	12014	13606	0.792085	oligopeptide ABC transporter, periplasmic binding protein	oppAIV	AAATGGTAAT--TATGAAATAA	lp21,lp5
T05TC602		cp26	13318	Forward	BBB16	Forward	12014	13606	0.819095	oligopeptide ABC transporter, periplasmic binding protein	oppAIV	ATGCTGATCC--TATGACGTTC	Complete
T08TC057		cp26	13467	Forward	BBB16	Forward	12014	13606	0.912688	oligopeptide ABC transporter, periplasmic binding protein	oppAIV	GCAGAAGCAA--TAATAATTGA	cp9
T06P01A01	T06P01A01, T06P01A03	cp26	13470	Reverse	BBB16	Forward	12014	13606	0.915201	oligopeptide ABC transporter, periplasmic binding protein	oppAIV	GAAGCAATAA--TAATTGAAAG	Not done
T06P01A03	see T06P01A01	cp26	13470	Reverse	BBB16	Forward	12014	13606	0.915201	oligopeptide ABC transporter, periplasmic binding protein	oppAIV	GAAGCAATAA--TAATTGAAAG	Not done
T10TC434		cp26	13506	Reverse	BBB16	Forward	12014	13606	0.937814	oligopeptide ABC transporter, periplasmic binding protein	oppAIV	TTTCTTAATA--TAACTTCTTC		lp5
T05TC372		cp26	13516	Reverse	BBB16	Forward	12014	13606	0.944095	oligopeptide ABC transporter, periplasmic binding protein	oppAIV	TAACTTCTTC--TAGTTATCTT	cp9	lp5
T10P01G09	T10P01G09, T11P01A04, T11P01B01, T11P01D01, T11P01F04, T11P01F12	cp26	13600	Reverse	BBB16	Forward	12014	13606	0.996859	oligopeptide ABC transporter, periplasmic binding protein	oppAIV	TAAAACCAAT--TAAATGATTT	Not done
T11P01A04	see T10P01G09	cp26	13600	Forward	BBB16	Forward	12014	13606	0.996231	oligopeptide ABC transporter, periplasmic binding protein	oppAIV	TAAAACCAAT--TAAATGATTT	Not done
T11P01B01	see T10P01G09	cp26	13600	Forward	BBB16	Forward	12014	13606	0.996231	oligopeptide ABC transporter, periplasmic binding protein	oppAIV	TAAAACCAAT--TAAATGATTT	Not done
T11P01D01	see T10P01G09	cp26	13600	Forward	BBB16	Forward	12014	13606	0.996231	oligopeptide ABC transporter, periplasmic binding protein	oppAIV	TAAAACCAAT--TAAATGATTT	Not done
T11P01F04	see T10P01G09	cp26	13600	Forward	BBB16	Forward	12014	13606	0.996231	oligopeptide ABC transporter, periplasmic binding protein	oppAIV	TAAAACCAAT--TAAATGATTT	Not done
T11P01F12	see T10P01G09	cp26	13600	Forward	BBB16	Forward	12014	13606	0.996231	oligopeptide ABC transporter, periplasmic binding protein	oppAIV	TAAAACCAAT--TAAATGATTT	Not done
T07TC302		cp26	13609	Forward	IR BBB16-BBB17	0	13607	13892	0.00701754	Intergenic Region	0	TTAAATGATT--TAAGTAAAAA		lp38,lp17
T08TC641		cp26	13701	Forward	IR BBB16-BBB17	0	13607	13892	0.329825	Intergenic Region	0	TTCTTTAACT--TAATTATTTT		lp5
T09TC481		cp26	13729	Reverse	IR BBB16-BBB17	0	13607	13892	0.431579	Intergenic Region	0	TATTTTTAAA--TAGAGTAAGC	lp5
T08TC017		cp26	13744	Reverse	IR BBB16-BBB17	0	13607	13892	0.484211	Intergenic Region	0	TAAGCATTAA--TATATTAATA	Complete
T04TC411		cp26	13749	Reverse	IR BBB16-BBB17	0	13607	13892	0.501754	Intergenic Region	0	ATTAATATAT--TAATACTAGA		lp38
T06TC585		cp26	13789	Reverse	IR BBB16-BBB17	0	13607	13892	0.642105	Intergenic Region	0	AAGCTATATT--TATTATTCTT	Not done
T05TC155		cp26	13877	Forward	IR BBB16-BBB17	0	13607	13892	0.947368	Intergenic Region	0	TTTAATTTGA--TAAATGTTTT	lp5
T05TC044		cp26	13932	Reverse	BBB17	Reverse	15107	13893	0.967051	inosine-5-monophosphate dehydrogenase	guaB	GGGATTCTTT--TAATGAAGAA		cp26,cp32-8,lp5
T07TC075		cp26	14182	Forward	BBB17	Reverse	15107	13893	0.761944	inosine-5-monophosphate dehydrogenase	guaB	CATTCCAACG--TAAGATTTGA	lp28-1,lp5
T03TC138		cp26	14348	Forward	BBB17	Reverse	15107	13893	0.625206	inosine-5-monophosphate dehydrogenase	guaB	ATATTTGTAT--TATTACAAGC	lp5
T05TC300		cp26	14426	Forward	BBB17	Reverse	15107	13893	0.560956	inosine-5-monophosphate dehydrogenase	guaB	GTTGTGCATA--TACTACCCGG	lp5
T04TC079		cp26	14472	Reverse	BBB17	Reverse	15107	13893	0.522241	inosine-5-monophosphate dehydrogenase	guaB	CTCCTACACT--TATTAAATCT	Complete
T06TC588	same site: T06TC588, T07TC201	cp26	14502	Forward	BBB17	Reverse	15107	13893	0.498353	inosine-5-monophosphate dehydrogenase	guaB	CTTTAGTTAC--TATGTTGCCA	Not done
T07TC201	same site: T06TC588, T07TC201	cp26	14502	Reverse	BBB17	Reverse	15107	13893	0.497529	inosine-5-monophosphate dehydrogenase	guaB	CTTTAGTTAC--TATGTTGCCA	lp5
T09TC221		cp26	14516	Forward	BBB17	Reverse	15107	13893	0.48682	inosine-5-monophosphate dehydrogenase	guaB	TTGCCAGCAA--TAAGGTCTAA	Complete
T05TC498		cp26	14604	Forward	BBB17	Reverse	15107	13893	0.414333	inosine-5-monophosphate dehydrogenase	guaB	CTATGACAAG--TATATCTACA	lp5
T06TC118		cp26	14610	Forward	BBB17	Reverse	15107	13893	0.40939	inosine-5-monophosphate dehydrogenase	guaB	CAAGTATATC--TACATGTGCT	cp32-3,lp5
T06TC406		cp26	15057	Forward	BBB17	Reverse	15107	13893	0.0411862	inosine-5-monophosphate dehydrogenase	guaB	TTCTTGGAAT--TAAAGACACA	Not done
T08TC428		cp26	15098	Forward	BBB17	Reverse	15107	13893	0.00741351	inosine-5-monophosphate dehydrogenase	guaB	TTTGTTATCT--TATTTGGCAT	lp5
T05TC239		cp26	15170	Forward	BBB18	Reverse	16718	15132	0.97604	GMP synthase	guaA	TTAGAAGATA--TATCATAACA	lp5
T10TC206		cp26	15206	Reverse	BBB18	Reverse	16718	15132	0.952711	GMP synthase	guaA	CGAACTTCAT--TAATTATTCT	Complete
T11TC084		cp26	15210	Forward	BBB18	Reverse	16718	15132	0.95082	GMP synthase	guaA	CTTCATTAAT--TATTCTTGAA	lp38,lp5	cp9
T10TC278		cp26	15285	Reverse	BBB18	Reverse	16718	15132	0.9029	GMP synthase	guaA	CTTGGGTATT--TACACATCTA	cp9,lp5
T05TC036		cp26	15297	Reverse	BBB18	Reverse	16718	15132	0.895334	GMP synthase	guaA	CACATCTAAT--TACAGCTGTA	Not done
T08TC324		cp26	15305	Reverse	BBB18	Reverse	16718	15132	0.89029	GMP synthase	guaA	ATTACAGCTG--TATATTCGTA	lp28-1,lp5
T04TC082		cp26	15482	Forward	BBB18	Reverse	16718	15132	0.779319	GMP synthase	guaA	ATTATTCTTA--TAGCTAGTCC	cp32-1
T04TC395	same site T04TC395, T07TC446	cp26	15591	Forward	BBB18	Reverse	16718	15132	0.710593	GMP synthase	guaA	TCAAAGGTTC--TAAGAGTTTT	lp5
T07TC446	same site T04TC395, T07TC446	cp26	15591	Reverse	BBB18	Reverse	16718	15132	0.709962	GMP synthase	guaA	TCAAAGGTTC--TAAGAGTTTT		lp5	TAAGGGGTTA--AAGCTTTTGA
T11TC159		cp26	15847	Forward	BBB18	Reverse	16718	15132	0.54918	GMP synthase	guaA	AGCATCAATA--TATTTTATAT	lp5	lp28-1
T05TC075		cp26	15854	Reverse	BBB18	Reverse	16718	15132	0.544136	GMP synthase	guaA	ATATATTTTA--TATTTAAATC	cp32-4	lp5
T04TC310		cp26	16008	Reverse	BBB18	Reverse	16718	15132	0.447037	GMP synthase	guaA	CAGAAAGTCC--TAAAATAACC	cp32-6
T03TC252	same site: T03TC252, T04TC237, T04TC288, T09TC172	cp26	16202	Forward	BBB18	Reverse	16718	15132	0.325347	GMP synthase	guaA	TCATTTGATA--TAGAAGCAAT		lp5
T04TC237	same site: T03TC252, T04TC237, T04TC288, T09TC172	cp26	16202	Forward	BBB18	Reverse	16718	15132	0.325347	GMP synthase	guaA	TCATTTGATA--TAGAAGCAAT	lp5
T04TC288	same site: T03TC252, T04TC237, T04TC288, T09TC172	cp26	16202	Reverse	BBB18	Reverse	16718	15132	0.324716	GMP synthase	guaA	TCATTTGATA--TAGAAGCAAT	lp28-1
T09TC172	same site: T03TC252, T04TC237, T04TC288, T09TC172	cp26	16202	Forward	BBB18	Reverse	16718	15132	0.325347	GMP synthase	guaA	TCATTTGATA--TAGAAGCAAT	cp9
T03TC209		cp26	16407	Forward	BBB18	Reverse	16718	15132	0.196091	GMP synthase	guaA	ATTTAACAAT--TATTTGCATT	cp32-6
T03TC148	same site: T03TC148, T04TC173, T07TC519, T08TC341	cp26	16425	Reverse	BBB18	Reverse	16718	15132	0.184111	GMP synthase	guaA	TTCCATAACA--TATACCCAAA	lp5
T04TC173	same site: T03TC148, T04TC173, T07TC519, T08TC341	cp26	16425	Forward	BBB18	Reverse	16718	15132	0.184741	GMP synthase	guaA	TTCCATAACA--TATACCCAAA	Complete
T07TC519	same site: T03TC148, T04TC173, T07TC519, T08TC341	cp26	16425	Forward	BBB18	Reverse	16718	15132	0.184741	GMP synthase	guaA	TTCCATAACA--TATACCCAAA	Complete
T08TC341	same site: T03TC148, T04TC173, T07TC519, T08TC341	cp26	16425	Forward	BBB18	Reverse	16718	15132	0.184741	GMP synthase	guaA	TTCCATAACA--TATACCCAAA	lp5
T10TC312		cp26	16561	Reverse	BBB18	Reverse	16718	15132	0.0983607	GMP synthase	guaA	TAAAGGAGTA--TAGTAAGGTA	cp9
T11TC300		cp26	16614	Forward	BBB18	Reverse	16718	15132	0.0655738	GMP synthase	guaA	TTCTTGCAAT--TAGTTGGCTA	Not done
T06TC023		cp26	16622	Reverse	BBB18	Reverse	16718	15132	0.0598991	GMP synthase	guaA	ATTAGTTGGC--TATATTGGGA	Complete
T08TC194		cp26	16644	Reverse	BBB18	Reverse	16718	15132	0.0460277	GMP synthase	guaA	CAAAATCTAA--TACAAGTATT	lp28-1
T05TC157		cp26	16672	Forward	BBB18	Reverse	16718	15132	0.0290038	GMP synthase	guaA	ATTCATTATA--TAAGTCCTTA	Complete
T06TC306		cp26	16928	Forward	BBB19	Forward	16903	17535	0.039557	outer surface protein C	ospC	TTAAGTGCAA--TATTAATGAC	lp5
T08TC072		cp26	16946	Reverse	BBB19	Forward	16903	17535	0.0696203	outer surface protein C	ospC	ACTTTATTTT--TATTTATATC	Complete
T08TC175		cp26	17225	Forward	BBB19	Forward	16903	17535	0.509494	outer surface protein C	ospC	TCAACCCTAA--TAAAACAAAA	Complete
T05TC297		cp26	17683	Forward	BBB20	Reverse	17733	17623	0.454545	conserved hypothetical protein		GCTCTTCTCT--TAAAGAATAA		cp9,lp5
T07TC104		cp26	17687	Reverse	BBB20	Reverse	17733	17623	0.409091	conserved hypothetical protein		TTCTCTTAAA--GAATAAAAAC	lp5		anomolous transposition event
T08TC648		cp26	17821	Reverse	BBB21	Forward	17750	17845	0.757895	conserved hypothetical protein		TTAAAGATAA--TAGTAGTTTC	lp5
T05TC480		cp26	17872	Forward	IR BBB21-BBB22	0	17846	17965	0.218487	Intergenic Region	0	TAAATAGACT--TAACTATTTA	Complete
T07TC516	same site: T07TC516, T08P01G06	cp26	18062	Forward	BBB22	Reverse	19321	17966	0.929151	purine permease P1	pbuG1	AATTAAGTAT--TATGTTTATT	lp5
T08P01G06	same site: T07TC516, T08P01G06	cp26	18062	Reverse	BBB22	Reverse	19321	17966	0.928413	purine permease P1	pbuG1	AATTAAGTAT--TATGTTTATT	Not done
T08TC069		cp26	18112	Reverse	BBB22	Reverse	19321	17966	0.891513	purine permease P1	pbuG1	CCCGAAGAGA--TATTGTATGT	Complete
T09TC188		cp26	18157	Reverse	BBB22	Reverse	19321	17966	0.858303	purine permease P1	pbuG1	AAACTGGGAA--TATTTTCTCT	lp5
T05TC011		cp26	18221	Forward	BBB22	Reverse	19321	17966	0.811808	purine permease P1	pbuG1	ATCCTACATA--TATTAGTGCT		lp5
T04TC024		cp26	18533	Reverse	BBB22	Reverse	19321	17966	0.580812	purine permease P1	pbuG1	TAAACAGCAA--TACCAATACA	Complete
T08TC047		cp26	18572	Reverse	BBB22	Reverse	19321	17966	0.55203	purine permease P1	pbuG1	AATGTTTGCT--TAATATGTAG	lp5
T07TC147	same site: T07TC147, T11TC039, T10TC499	cp26	18575	Reverse	BBB22	Reverse	19321	17966	0.549815	purine permease P1	pbuG1	GTTTGCTTAA--TATGTAGGAA	lp5
T10TC499	same site: T07TC147, T11TC039, T10TC499	cp26	18575	Reverse	BBB22	Reverse	19321	17966	0.549815	purine permease P1	pbuG1	GTTTGCTTAA--TATGTAGGAA	Complete
T11TC039	same site: T07TC147, T11TC039, T10TC499	cp26	18575	Forward	BBB22	Reverse	19321	17966	0.550554	purine permease P1	pbuG1	GTTTGCTTAA--TATGTAGGAA	lp28-2,lp5
T05TC052		cp26	18598	Reverse	BBB22	Reverse	19321	17966	0.532841	purine permease P1	pbuG1	TCTAACTGGT--TAAATATTGG	cp9
T04TC458		cp26	18687	Reverse	BBB22	Reverse	19321	17966	0.467159	purine permease P1	pbuG1	AAAGATTGCA--TATATCCAAG	Complete
T06TC015		cp26	18728	Reverse	BBB22	Reverse	19321	17966	0.4369	purine permease P1	pbuG1	TTGCCCAAAG--TATACTTCCC	lp5	lp28-1
T07TC196		cp26	18730	Reverse	BBB22	Reverse	19321	17966	0.435424	purine permease P1	pbuG1	GCCCAAAGTA--TACTTCCCCT	Complete
T03TC268		cp26	18742	Forward	BBB22	Reverse	19321	17966	0.427306	purine permease P1	pbuG1	CTTCCCCTTA--TATTTAATTG	lp28-1,lp5
T08TC585		cp26	19091	Forward	BBB22	Reverse	19321	17966	0.169742	purine permease P1	pbuG1	GTGCTAGTGA--TATAGGGGTA	Complete
T05TC517		cp26	19099	Reverse	BBB22	Reverse	19321	17966	0.1631	purine permease P1	pbuG1	GATATAGGGG--TATTAGTATA	cp32-6,lp28-1
T04TC088		cp26	19107	Reverse	BBB22	Reverse	19321	17966	0.157196	purine permease P1	pbuG1	GGTATTAGTA--TAAAGCCCCA	lp28-1
T07TC086		cp26	19118	Forward	BBB22	Reverse	19321	17966	0.149815	purine permease P1	pbuG1	AAAGCCCCAT--TAATATACTA	cp9,lp5
T05TC344		cp26	19121	Forward	BBB22	Reverse	19321	17966	0.147601	purine permease P1	pbuG1	GCCCCATTAA--TATACTAGAA	cp9	lp5
T08TC028		cp26	19190	Forward	BBB22	Reverse	19321	17966	0.096679	purine permease P1	pbuG1	CTGTGCTAGA--TAATATTGCC	Complete
T07TC451		cp26	19211	Reverse	BBB22	Reverse	19321	17966	0.0804428	purine permease P1	pbuG1	GATTAACAGC--TATTATGTAT	cp9	lp5
T10TC047		cp26	19266	Forward	BBB22	Reverse	19321	17966	0.0405904	purine permease P1	pbuG1	TTCTTTTTTA--TAATCAATGG	cp32-7,cp9,lp5
T08TC253		cp26	19580	Forward	BBB23	Reverse	20822	19431	0.892883	purine permease P2	pbuG2	GAAGAAATGC--TATAAGCTAA	lp5
T04TC216	same site: T04TC216, T07TC313	cp26	19680	Forward	BBB23	Reverse	20822	19431	0.820992	purine permease P2	pbuG2	TTGAAAATCC--TACATATATT	lp5
T07TC313	same site: T04TC216, T07TC313	cp26	19680	Forward	BBB23	Reverse	20822	19431	0.820992	purine permease P2	pbuG2	TTGAAAATCC--TACATATATT	lp5	lp17
T08TC519		cp26	19684	Forward	BBB23	Reverse	20822	19431	0.818116	purine permease P2	pbuG2	AAATCCTACA--TATATTAATG	Complete
T08TC475		cp26	19758	Reverse	BBB23	Reverse	20822	19431	0.764198	purine permease P2	pbuG2	CAAATAGAAA--TAATGTTCCA	cp9,lp5
T06TC342		cp26	19832	Reverse	BBB23	Reverse	20822	19431	0.710999	purine permease P2	pbuG2	TCAATATAAG--TAGTAACAGT	lp5
T06TC363		cp26	20000	Forward	BBB23	Reverse	20822	19431	0.590942	purine permease P2	pbuG2	AACAAGAGAA--TAAAAACTAT	lp5
T05TC285		cp26	20163	Forward	BBB23	Reverse	20822	19431	0.47376	purine permease P2	pbuG2	ATATCCAAGC--TATGGCAGTG	lp5
T08TC192		cp26	20195	Forward	BBB23	Reverse	20822	19431	0.450755	purine permease P2	pbuG2	GCCCAAAGTA--TACTTCCCCT	cp9,lp5
T09TC192		cp26	20297	Forward	BBB23	Reverse	20822	19431	0.377426	purine permease P2	pbuG2	CCAACCAATG--TAGCATCATT	lp21
T06TC449		cp26	20459	Forward	BBB23	Reverse	20822	19431	0.260963	purine permease P2	pbuG2	AGTCCTTCAA--TAAAAACAGC	Not done
T11TC298		cp26	20490	Reverse	BBB23	Reverse	20822	19431	0.237958	purine permease P2	pbuG2	CTTGCCAAGG--TATATTCATC	Not done
T03TC156		cp26	20556	Reverse	BBB23	Reverse	20822	19431	0.19051	purine permease P2	pbuG2	AAGCCAATGC--TAAAGGCGTA	cp9,lp5
T08TC386		cp26	20669	Forward	BBB23	Reverse	20822	19431	0.109993	purine permease P2	pbuG2	ATTGCTGGGT--TAACAGCTAT	lp5
T04TC280		cp26	20683	Forward	BBB23	Reverse	20822	19431	0.0999281	purine permease P2	pbuG2	AGCTATAATA--TATGACATAC	lp5
T03TC106		cp26	20729	Reverse	BBB23	Reverse	20822	19431	0.0661395	purine permease P2	pbuG2	ATTTCCTTTT--TATAGTTAAT	lp5
T10TC177		cp26	20735	Forward	BBB23	Reverse	20822	19431	0.0625449	purine permease P2	pbuG2	TTTTTATAGT--TAATATCACT	Complete
[truncated: 2,481 more rows]

## Sheet: Unique sites
Name of clone	Same Site Clones	Replicon	Insertion Site	Tn Or.	Gene	Gene Or.	5'	3'	Insertion Ratio	Description	Common Name	Insertion Site Sequence	Plasmid Content		Comments
													Absent	Intermediate
T08TC701		Chrom	1277	Reverse	BB0002	Reverse	1796	768	0.503891	glycosyl hydrolase family 3 N domain protein		ATACCCAATC--TACGCAATTG		lp5
T07TC470		Chrom	12770	Reverse	BB0014	Forward	12746	14728	0.0126135	primosomal protein N	priA	TCATTCAACT--TATTACTATG	Complete
T08TC309		Chrom	12776	Forward	BB0014	Forward	12746	14728	0.0151362	primosomal protein N	priA	AACTTATTAC--TATGAAATAG	lp5
T08TC351		Chrom	12789	Reverse	BB0014	Forward	12746	14728	0.0221998	primosomal protein N	priA	GAAATAGCAA--TAAATATTCC	lp21,lp5
T04TC135		Chrom	13668	Reverse	BB0014	Forward	12746	14728	0.465691	primosomal protein N	priA	AATAACCAAA--TAAAAAAAAT	Complete
T05TC356	same site T05TC356, T08TC311	Chrom	13772	Reverse	BB0014	Forward	12746	14728	0.518163	primosomal protein N	priA	AGAACTATTA--TACAGTATAC	cp9	lp5
T04TC038		Chrom	13945	Reverse	BB0014	Forward	12746	14728	0.605449	primosomal protein N	priA	GCCACTATTG--TAGTTATAAA	lp5
T09TC184		Chrom	14012	Reverse	BB0014	Forward	12746	14728	0.639253	primosomal protein N	priA	ATACAAAACT--TATGGAATTC	lp5
T07TC063	T07TC063, T07TC076	Chrom	14605	Forward	BB0014	Forward	12746	14728	0.937941	primosomal protein N	priA	ACAGATACAA--TATAATATAC	lp5
T08TC589		Chrom	15803	Forward	IR BB0016-BB0017	0	15723	15844	0.661157	Intergenic Region		AGAATTCAAG--TAAATTACTA		cp9,lp5
T10TC412		Chrom	15906	Reverse	BB0017	Forward	15845	16804	0.0646507	conserved hypothetical integral membrane protein		CTATTATTAC--TAATACTAAT		lp5
T05TC255		Chrom	15912	Forward	BB0017	Forward	15845	16804	0.0698644	conserved hypothetical integral membrane protein		TTACTAATAC--TAATAAAAAA	Complete
T10TC496	same site T10TC496, T11TC133	Chrom	15931	Forward	BB0017	Forward	15845	16804	0.0896767	conserved hypothetical integral membrane protein		AATTAAAGAC--TATAACTAAA	lp5
T08TC605		Chrom	15975	Forward	BB0017	Forward	15845	16804	0.135558	conserved hypothetical integral membrane protein		ACAATACAAA--TAACTTTAGG	lp5
T08TC643		Chrom	16083	Reverse	BB0017	Forward	15845	16804	0.249218	conserved hypothetical integral membrane protein		CATTACCTAT--TAAGCTTCAA	lp5
T08TC542		Chrom	16116	Forward	BB0017	Forward	15845	16804	0.282586	conserved hypothetical integral membrane protein		ATATTTGCAT--TAAACATACC	Complete
T04TC336		Chrom	16165	Forward	BB0017	Forward	15845	16804	0.333681	conserved hypothetical integral membrane protein		ACCTAACATT--TATAATTCAA	lp28-1
T09TC452		Chrom	16196	Forward	BB0017	Forward	15845	16804	0.366006	conserved hypothetical integral membrane protein		AATGGGATTA--TATTCTATTA		lp5
T05TC494		Chrom	16239	Forward	BB0017	Forward	15845	16804	0.410845	conserved hypothetical integral membrane protein		CAAAATAAAA--TACATCTTAA	cp9,lp5
T06TC174		Chrom	16246	Reverse	BB0017	Forward	15845	16804	0.419187	conserved hypothetical integral membrane protein		AAATACATCT--TAATGATATG	lp5
T09TC420		Chrom	16263	Forward	BB0017	Forward	15845	16804	0.435871	conserved hypothetical integral membrane protein		ATGATGCTTG--TATCAATACT	lp28-1
T04TC019		Chrom	16269	Forward	BB0017	Forward	15845	16804	0.442127	conserved hypothetical integral membrane protein		CTTGTATCAA--TACTAGCTGG	lp28-2,lp5
T11TC206		Chrom	16351	Reverse	BB0017	Forward	15845	16804	0.528676	conserved hypothetical integral membrane protein		ATATAATTGC--TATGATCATT		lp28-1,lp5
T09TC408		Chrom	16360	Reverse	BB0017	Forward	15845	16804	0.53806	conserved hypothetical integral membrane protein		CTATGATCAT--TAAAGAAAAA	Complete
T08TC026	T08TC026, T08TC160, T08TC178	Chrom	16470	Reverse	BB0017	Forward	15845	16804	0.652763	conserved hypothetical integral membrane protein		TATACACTAA--TAGCATCATT	Complete
T05TC552		Chrom	16489	Reverse	BB0017	Forward	15845	16804	0.672576	conserved hypothetical integral membrane protein		TTGTAACATC--TATCATGACA	lp5
T10TC461		Chrom	16536	Forward	BB0017	Forward	15845	16804	0.720542	conserved hypothetical integral membrane protein		CAAAAAGCAA--TATTAATCAT	lp5
T10TC526		Chrom	16571	Reverse	BB0017	Forward	15845	16804	0.758081	conserved hypothetical integral membrane protein		AGAAATTGCT--TATCTTCTTA	lp5
T10TC506		Chrom	16579	Forward	BB0017	Forward	15845	16804	0.765381	conserved hypothetical integral membrane protein		CTTATCTTCT--TACAAACAAG		lp5
T04TC072		Chrom	16611	Reverse	BB0017	Forward	15845	16804	0.799791	conserved hypothetical integral membrane protein		GCTACATTAA--TAGACGGAAA	Complete
T07TC148	T10TC418, T10TC468; same site T07TC148	Chrom	16653	Reverse	BB0017	Forward	15845	16804	0.843587	conserved hypothetical integral membrane protein		AAAACTATAG--TATTTATAGT	Complete
T06TC407		Chrom	16659	Forward	BB0017	Forward	15845	16804	0.848801	conserved hypothetical integral membrane protein		ATAGTATTTA--TAGTAGTTCC	Not done
T05TC306		Chrom	16662	Reverse	BB0017	Forward	15845	16804	0.852972	conserved hypothetical integral membrane protein		GTATTTATAG--TAGTTCCAAT	lp5
T11TC429		Chrom	16690	Reverse	BB0017	Forward	15845	16804	0.882169	conserved hypothetical integral membrane protein		TATCAAGAAT--TAAATATATA	lp28-1
T10TC511		Chrom	16696	Forward	BB0017	Forward	15845	16804	0.887383	conserved hypothetical integral membrane protein		GAATTAAATA--TATATCACAA	Complete
T09TC528		Chrom	16698	Reverse	BB0017	Forward	15845	16804	0.890511	conserved hypothetical integral membrane protein		ATTAAATATA--TATCACAAAA	lp5
T10TC156		Chrom	20054	Reverse	IR BB0020-BB0021	0	19980	20444	0.161638	Intergenic Region	0	CTAATATCTA--TATATTATTT	cp32-7
T05TC441		Chrom	20315	Reverse	IR BB0020-BB0021	0	19980	20444	0.724138	Intergenic Region	0	AAGATGACTC--TAAAGCCCTA	Complete
T08TC699		Chrom	20825	Forward	BB0021	Reverse	21092	20445	0.412674	S-adenosylmethionine: tRNA ribosyltransferase-isomerase	queA	GTGAATAAAT--TAGTGTCAAT	Complete
T10P01D01	T10P01D01, T10P01E01	Chrom	20884	Forward	BB0021	Reverse	21092	20445	0.321484	S-adenosylmethionine: tRNA ribosyltransferase-isomerase	queA	TGATTCTGCA--TATATTCTTG	lp5
T05TC143		Chrom	20886	Forward	BB0021	Reverse	21092	20445	0.318393	S-adenosylmethionine: tRNA ribosyltransferase-isomerase	queA	ATTCTGCATA--TATTCTTGAT	Complete
T09TC421		Chrom	20931	Forward	BB0021	Reverse	21092	20445	0.248841	S-adenosylmethionine: tRNA ribosyltransferase-isomerase	queA	TATTACTATT--TATATATTTT		lp5
T07TC120		Chrom	21039	Forward	BB0021	Reverse	21092	20445	0.0819165	S-adenosylmethionine: tRNA ribosyltransferase-isomerase	queA	GATATTGCTC--TATTAAAGAA	lp17,lp28-2,lp5	cp32-8
T06TC101		Chrom	21112	Reverse	BB0022	Reverse	22101	21058	0.947267	Holliday junction DNA helicase, subunit B	ruvB	TCTCTAAGTT--TAAGTGAAGG	lp28-1,lp5
T10TC486		Chrom	21176	Forward	BB0022	Reverse	22101	21058	0.886865	Holliday junction DNA helicase, subunit B	ruvB	AAATCCTTTC--ATAATTAAAT	Complete		anomolous transposition event
T04TC355		Chrom	21234	Reverse	BB0022	Reverse	22101	21058	0.830297	Holliday junction DNA helicase, subunit B	ruvB	CCTACAGAAA--TAGCTAAAGT	lp21,lp38
T03TC047		Chrom	21517	Reverse	BB0022	Reverse	22101	21058	0.558965	Holliday junction DNA helicase, subunit B	ruvB	AATTTCTCTT--TATTATCTCA	Complete
T03TC051		Chrom	21916	Reverse	BB0022	Reverse	22101	21058	0.176414	Holliday junction DNA helicase, subunit B	ruvB	GTGGGCCACT--TAAAAACACA	Complete
T11TC161		Chrom	22002	Reverse	BB0022	Reverse	22101	21058	0.0939597	Holliday junction DNA helicase, subunit B	ruvB	ACCTGACCTT--TAAAATCTTC	lp28-1,cp32-4
T05TC008		Chrom	22026	Reverse	BB0022	Reverse	22101	21058	0.0709492	Holliday junction DNA helicase, subunit B	ruvB	ACTTTAGGCC--TAAGCTCATT	lp21,lp38
T11P01A01		Chrom	22339	Reverse	BB0023	Reverse	22146	22739	0.674536	Holliday junction DNA helicase, subunit A	ruvA	GCTCGCTAT--TAATCAAAAGC	Not done
T08TC025		Chrom	22843	Forward	BB0024	Forward	22819	23958	0.0210711	conserved hypothetical protein		TTTAAATAGC--TATTTTCAAT	cp9,lp5
T09TC386		Chrom	22857	Reverse	BB0024	Forward	22819	23958	0.0342406	conserved hypothetical protein		TTCAATTAAT--TACAACTATT	Complete
T11TC199		Chrom	23006	Forward	BB0024	Forward	22819	23958	0.164179	conserved hypothetical protein		GATGGAAATA--TATTCATAGG	Complete	lp28-1
T05TC359		Chrom	23097	Forward	BB0024	Forward	22819	23958	0.244074	conserved hypothetical protein		AACCTATTGG--TATTGATTAT	cp9,lp5
T07TC240		Chrom	23186	Reverse	BB0024	Forward	22819	23958	0.32309	conserved hypothetical protein		AATAAAAGCA--TAAAATCACA	Complete
T11TC103		Chrom	23701	Reverse	BB0024	Forward	22819	23958	0.775241	conserved hypothetical protein		TCCAAAAGAA--TACATAAATA	lp28-1	lp5
T05TC122		Chrom	23720	Reverse	BB0024	Forward	22819	23958	0.791923	conserved hypothetical protein		AAATTATTCA--TAGCAGAACA	lp38,cp9,lp21,lp5
T11TC022		Chrom	23932	Forward	BB0024	Forward	22819	23958	0.977173	conserved hypothetical protein		AAATAAAATA--TACAGAGTTT	lp5
T11TC001		Chrom	24097	Forward	BB0025	Reverse	24696	23965	0.819425	conserved hypothetical protein		TTTCAGGAAT--TAAAGCTATC	lp21,lp5
T08P01E01	T08P01E01, T08P01E07, T08P02B04, T08P02C03, T08P02D02	Chrom	24428	Reverse	BB0025	Reverse	24696	23965	0.365253	conserved hypothetical protein		ATAAGGAGCA--TAAGCCTCAT	Not done
T06P01D03	T06P01D03, T06P01F07, T06P01H03	Chrom	24437	Forward	BB0025	Reverse	24696	23965	0.354309	conserved hypothetical protein		ATAAGCCTCA--TAAGTTATTT	lp21
T07TC336		Chrom	40790	Reverse	BB0042	Reverse	41432	40761	0.955291	phosphate transport system regulatory protein	phoU	TCACCTATTC--TAATAAAATA	Complete
T05TC153		Chrom	41271	Reverse	BB0042	Reverse	41432	40761	0.23845	phosphate transport system regulatory protein	phoU	GATAATCATC--TATTATTTTT	Complete
T03TC264		Chrom	41526	Forward	BB0043	Reverse	42483	41443	0.920192	conserved hypothetical protein		ATAACCAATT--TATAGTAATG	cp9,lp5
T05TC079		Chrom	41594	Reverse	BB0043	Reverse	42483	41443	0.853846	conserved hypothetical protein		TCCCAACAAA--TAACTATATT		lp28-1
T07TC130		Chrom	41631	Reverse	BB0043	Reverse	42483	41443	0.818269	conserved hypothetical protein		TTAATATACT--TAGGAAAGTA	cp9,lp28-1,lp5
T10TC024		Chrom	41799	Reverse	BB0043	Reverse	42483	41443	0.656731	conserved hypothetical protein		ATAGCAAGCC--TAATTAGATC	cp9	lp5
T05TC370		Chrom	41912	Forward	BB0043	Reverse	42483	41443	0.549038	conserved hypothetical protein		CAATAAAATA--TATTTATCGT	cp9,lp21	lp5
T09TC275		Chrom	42145	Reverse	BB0043	Reverse	42483	41443	0.324038	conserved hypothetical protein		TCAAGATAAT--TATTTTATTA	cp9,lp28-1,lp5
T07TC119		Chrom	42153	Forward	BB0043	Reverse	42483	41443	0.317308	conserved hypothetical protein		ATTATTTTAT--TAAATTCACT	cp9,lp5
T04TC318		Chrom	42352	Forward	BB0043	Reverse	42483	41443	0.125962	conserved hypothetical protein		AATTGGTATT--TACACTAATA	Complete
T09P01A04	same site T09P01A04, T11TC348	Chrom	42360	Forward	BB0043	Reverse	42483	41443	0.118269	conserved hypothetical protein		TTTACACTAA--TATCTACCTC	Not done
T03TC105		Chrom	42409	Forward	BB0043	Reverse	42483	41443	0.0711538	conserved hypothetical protein		CGTCTTGACT--TATAAAAGCT	Complete
T09TC254		Chrom	42994	Forward	BB0045	Reverse	45366	42907	0.96462	P115 protein		CATTATGGGT--TATTACTAAG	Not done
T07TC397		Chrom	43212	Forward	BB0045	Reverse	45366	42907	0.875966	P115 protein		AAATTTATTC--TAATCTCAAC	lp38
T06TC309		Chrom	44182	Forward	BB0045	Reverse	45366	42907	0.481497	P115 protein		TAAGAGAGTC--TAATATATGC	lp5
T04TC257	same site: T05TC115, T04TC257, T05TC616	Chrom	44939	Forward	BB0045	Reverse	45366	42907	0.173648	P115 protein		TATAAACATA--TAAGGCGATT	lp5
T07TC420		Chrom	45036	Forward	BB0045	Reverse	45366	42907	0.134201	P115 protein		GAACCATCCT--TATAAAGACG	Complete
T09TC343		Chrom	45174	Forward	BB0045	Reverse	45366	42907	0.0780805	P115 protein		AAATCAGAAA--TATCTTCAAC		lp5
T06TC431		Chrom	45430	Reverse	IR BB0045-BB0046	0	45367	45445	0.820513	Intergenic Region	0	AAAAATATTT--TAAAAAAAGG	Not done
T11P01F06		Chrom	45535	Forward	BB0046	Forward	45446	45991	0.163303	ribonuclease HII	rnhB	AGCCCAGCTT--TATAAAAGAA	lp5
T10TC020		Chrom	45588	Forward	BB0046	Forward	45446	45991	0.26055	ribonuclease HII	rnhB	AGAGAGTACC--TATCCTCATT	cp32-6,lp5
T09TC010		Chrom	45614	Reverse	BB0046	Forward	45446	45991	0.310092	ribonuclease HII	rnhB	TGAAAACTCA--TATTATGCAT		lp5
T08P02E02		Chrom	45640	Forward	BB0046	Forward	45446	45991	0.355963	ribonuclease HII	rnhB	AAATTTCAAA--TATAACAATA	cp9,lp5
T08P01A04		Chrom	45642	Forward	BB0046	Forward	45446	45991	0.359633	ribonuclease HII	rnhB	TTTCAAATA--TAACAATAGAA	cp9,lp5		Poor quality sequence
T09TC189		Chrom	45735	Forward	BB0046	Forward	45446	45991	0.530275	ribonuclease HII	rnhB	TTAGTACTTG--TAGATGGCAA	lp5
T07TC411		Chrom	45841	Reverse	BB0046	Forward	45446	45991	0.726606	ribonuclease HII	rnhB	TTGCTAAAGT--TAAAAGAGAC	lp5
T08TC527		Chrom	47135	Reverse	IR BB0049-BB0050	0	47041	47166	0.76	Intergenic Region	0	AATTTTATAA--TAGTAAATCA	lp5
T08TC467	T08TC467, T08TC576	Chrom	47138	Forward	IR BB0049-BB0050	0	47041	47166	0.776	Intergenic Region	0	TTTATAATAG--TAAATCAAAT	lp5
T07TC280		Chrom	47202	Forward	BB0050	Forward	47167	47841	0.0519288	putative transporter		GCGTGCTATT--TACCACTTAT	cp9
T05TC281		Chrom	47285	Reverse	BB0050	Forward	47167	47841	0.176558	putative transporter		GCAATTATTA--TAGCAAACAT	cp32-6
T09TC314	T09TC314, T09TC442	Chrom	47349	Reverse	BB0050	Forward	47167	47841	0.271513	putative transporter		TGGGCAACAT--TATTTATACA	cp32-6,cp9
T03TC089		Chrom	47365	Forward	BB0050	Forward	47167	47841	0.293769	putative transporter		TACATCATCA--TACATTGCAA	lp5
T05TC501	same site T05TC501, T07TC180	Chrom	47576	Forward	BB0050	Forward	47167	47841	0.606825	putative transporter		GTTGCATACC--TAATATCCCA	lp5	cp9
T08TC353		Chrom	47603	Forward	BB0050	Forward	47167	47841	0.646884	putative transporter		GATGTTTATC--TATATCAGCT	lp5
T10TC420		Chrom	47666	Forward	BB0050	Forward	47167	47841	0.740356	putative transporter		GGATCAACAT--TAATAAGTGG	lp5
T05TC506		Chrom	47891	Reverse	IR BB0050-BB0051	0	47842	47904	0.806452	Intergenic Region	0	ATCAATCTGC--TACAATTAAA	lp28-1
T10P02G05	T10P02G05, T10P02H06	Chrom	47951	Forward	BB0051	Forward	47905	48606	0.0656205	conserved hypothetical integral membrane protein		GGAATGTTTC--TATTTATATA	Complete
T04TC183		Chrom	47955	Forward	BB0051	Forward	47905	48606	0.0713267	conserved hypothetical integral membrane protein		TGTTTCTATT--TATATATACA	lp5
T05TC109	same site T05TC109, T08TC617	Chrom	47957	Reverse	BB0051	Forward	47905	48606	0.0756063	conserved hypothetical integral membrane protein		TTTCTATTTA--TATATACAGC	lp5
T05TC141	same site T05TC141, T11TC488	Chrom	48045	Forward	BB0051	Forward	47905	48606	0.199715	conserved hypothetical integral membrane protein		TGTCAAACAT--TATAATATTA	lp28-1,lp5
T04TC361		Chrom	48047	Forward	BB0051	Forward	47905	48606	0.202568	conserved hypothetical integral membrane protein		TCAAACATTA--TAATATTAAG	cp32-4,lp5
T06TC378		Chrom	48107	Reverse	BB0051	Forward	47905	48606	0.289586	conserved hypothetical integral membrane protein		ATTACCTTTT--TATCAGCAGC	Not done
T11TC459		Chrom	48197	Forward	BB0051	Forward	47905	48606	0.416548	conserved hypothetical integral membrane protein		TTGCTAAACA--TAACTTTTAC	Not done
T10TC447		Chrom	48210	Reverse	BB0051	Forward	47905	48606	0.436519	conserved hypothetical integral membrane protein		CTTTTACAAT--TATGCTTTAT	Complete
T08TC584		Chrom	48217	Reverse	BB0051	Forward	47905	48606	0.446505	conserved hypothetical integral membrane protein		AATTATGCTT--TATTTTACGA	Complete
T10TC451	T10TC451, T10TC458	Chrom	48230	Reverse	BB0051	Forward	47905	48606	0.46505	conserved hypothetical integral membrane protein		TTTACGATAC--TATTCAATCA	Complete
T10P01D10		Chrom	48243	Forward	BB0051	Forward	47905	48606	0.482168	conserved hypothetical integral membrane protein		TCAATCATAA--TAAATTAGAC	Not done
T10TC441		Chrom	48248	Forward	BB0051	Forward	47905	48606	0.489301	conserved hypothetical integral membrane protein		CATAATAAAT--TAGACACCGC	lp5
T08P01B01		Chrom	48282	Forward	BB0051	Forward	47905	48606	0.537803	conserved hypothetical integral membrane protein		AAATACTGTT--TAATAACTCT	Not done
T08TC334		Chrom	48345	Reverse	BB0051	Forward	47905	48606	0.629101	conserved hypothetical integral membrane protein		TATCCCAATA--TACAAACATC	lp5
T08TC038		Chrom	48356	Reverse	BB0051	Forward	47905	48606	0.644793	conserved hypothetical integral membrane protein		ACAAACATCT--TACTATATAA	cp9,lp21,lp5
T08TC126		Chrom	48367	Forward	BB0051	Forward	47905	48606	0.659058	conserved hypothetical integral membrane protein		ACTATATAAT--TATTTAAAGC	Complete
T02P01A01	T02P01A01, T02P01A06	Chrom	48458	Forward	BB0051	Forward	47905	48606	0.788873	conserved hypothetical integral membrane protein		TTCAATCTAG--TATTTAACTA	cp9
T06P01A08	T06P01A08, T06P01E07, T06P01E08	Chrom	48473	Reverse	BB0051	Forward	47905	48606	0.811698	conserved hypothetical integral membrane protein		ATAAATACAA--TACTTAAATT	Not done
T10P01A02	T10P01A02, T10P01E05, T10P01E08, T10P01H11, T10P02F06	Chrom	48477	Forward	BB0051	Forward	47905	48606	0.815977	conserved hypothetical integral membrane protein		ATACAATACT--TAAATTCTAC	Complete
T05TC607	same site: T05TC607, T08TC450	Chrom	48542	Forward	BB0051	Forward	47905	48606	0.908702	conserved hypothetical integral membrane protein		ACATTAATAA--TAATTGCAAT	Complete
T05TC062		Chrom	49715	Forward	BB0053	Forward	49341	50012	0.557377	uracil DNA glycosylase	ung	TTCTAATAAA--TACAATTTTA	cp9,lp5
T10P01D12		Chrom	49829	Reverse	BB0053	Forward	49341	50012	0.728763	uracil DNA glycosylase	ung	ACATTGTGTT--TATGCTTTGG	cp32-6
T05TC262		Chrom	65792	Reverse	BB0071	Forward	65768	67240	0.0169837	membrane protein, putative		AGGTTTTTTA--TATTTAATTA	cp9,lp5
T04TC428		Chrom	65900	Forward	BB0071	Forward	65768	67240	0.0896739	membrane protein, putative		TGCCAATGAA--TATATAAATT	lp5
T07TC016		Chrom	66300	Reverse	BB0071	Forward	65768	67240	0.362092	membrane protein, putative		GCTTTTATGA--TAAGCAAAGA	cp9
T08TC176		Chrom	66331	Reverse	BB0071	Forward	65768	67240	0.383152	membrane protein, putative		TTTATCCATT--TACAGTTCTC	Complete
T08TC148		Chrom	66508	Reverse	BB0071	Forward	65768	67240	0.503397	membrane protein, putative		TTACTACAAA--TATTGATCCC	Complete
T03TC304		Chrom	66779	Forward	BB0071	Forward	65768	67240	0.686821	membrane protein, putative		AAAATTAAAT--TACTTTGATT	Complete
T04TC351		Chrom	66813	Forward	BB0071	Forward	65768	67240	0.709918	membrane protein, putative		AACATTTATA--TAATGCTGGG	lp28-1,cp32-4,lp5
T05TC148		Chrom	69945	Forward	BB0073	Forward	69566	70126	0.676786	conserved hypothetical protein		TTTGAAGGAT--TAGAAATACT	cp32-6,cp9
T11TC113		Chrom	77893	Forward	BB0082	Reverse	79009	77711	0.859784	conserved hypothetical protein		TCCTTATCAA--TATAACCAAT	cp32-6	lp5
T09TC374		Chrom	79457	Forward	IR BB0083-BB0084	0	79377	79504	0.629921	Intergenic Region	0	AAAATAATGA--TATAATAATT	Complete
T05TC426		Chrom	80845	Reverse	IR BB0084-BB0085	0	80774	80982	0.346154	Intergenic Region	0	ATTTCAGGAT--TAATAAGAAT		lp28-1
T11P01A10		Chrom	80893	Forward	IR BB0084-BB0085	0	80774	80982	0.572115	Intergenic Region	0	ATTTCAACTG--TAATACTATA	Not done
T11TC194		Chrom	81399	Reverse	BB0085	Forward	80983	81408	0.981176	conserved hypothetical protein		TAAGGAGAAC--TATCAGATGA	Complete
T05TC072		Chrom	81971	Forward	BB0086	Forward	81405	82940	0.36873	putative Mg chelatase homolog		AAGATTATAT--TATAGATTAT	lp28-2,lp5
T07TC424		Chrom	82925	Reverse	BB0086	Forward	81405	82940	0.990879	putative Mg chelatase homolog		ACGGAGAAAA--TATGCTTGAA	lp5
T04TC332		Chrom	85045	Reverse	BB0088	Reverse	85720	84041	0.401429	GTP-binding membrane protein	lepA	ACATCTGATA--TATTTTTTAT	Complete
T07TC038		Chrom	85276	Forward	BB0088	Reverse	85720	84041	0.264443	GTP-binding membrane protein	lepA	AATGGATCCT--TAATACTTCC	Complete
T09P01B04	T9P01B04, T9P01C01	Chrom	85789	Forward	IR BB0088-BB0089	0	85721	85879	0.43038	Intergenic Region	0	AATGTAGATT--TACCATGATC	Complete
T09TC444		Chrom	85935	Reverse	BB0089	Reverse	86854	85880	0.942505	hypothetical protein		TTTAGCAATA--TAAGGAGAAA		lp5
T08TC330		Chrom	94829	Reverse	BB0098	Reverse	96953	94611	0.90649	homologous recombination suppressor protein MutS2	mutS2	CTCATACCCC--TAATATCAAT	Complete
T10TC244		Chrom	95445	Reverse	BB0098	Reverse	96953	94611	0.643467	homologous recombination suppressor protein MutS2	mutS2	CACGAATTAC--TATGCTCCTG	lp5
T10TC437		Chrom	95957	Forward	BB0098	Reverse	96953	94611	0.425278	homologous recombination suppressor protein MutS2	mutS2	TTAGGACCAG--TAATAATTAC	Complete
T08TC462		Chrom	95960	Forward	BB0098	Reverse	96953	94611	0.423997	homologous recombination suppressor protein MutS2	mutS2	GGACCAGTAA--TAATTACAAC	cp9
T05TC598		Chrom	96795	Reverse	BB0098	Reverse	96953	94611	0.0670367	homologous recombination suppressor protein MutS2	mutS2	TAATCAGACT--TACAAAGGAG	Complete
T06TC494		Chrom	97224	Forward	BB0099	Reverse	97866	96943	0.695558	ribosome small subunit-dependent GTPase A	rsgA	GAATAAACGG--TAGTATGTTT	Not done
T06TC126	same site: T06TC126, T10TC123	Chrom	97248	Forward	BB0099	Reverse	97866	96943	0.669556	ribosome small subunit-dependent GTPase A	rsgA	CTAGAATACT--TATGTGAAAT	lp5
T08TC466		Chrom	97697	Forward	BB0099	Reverse	97866	96943	0.183099	ribosome small subunit-dependent GTPase A	rsgA	GCGAGAACTA--TAAATATATC	lp21
T04TC153		Chrom	97762	Forward	BB0099	Reverse	97866	96943	0.112676	ribosome small subunit-dependent GTPase A	rsgA	CTGTTTCTAA--TACCTTACCC	cp9,lp28-2,lp5
T06TC440	same site: T06TC440, T08TC104	Chrom	97822	Reverse	BB0099	Reverse	97866	96943	0.0465872	ribosome small subunit-dependent GTPase A	rsgA	AAATAGAATA--TATATTATTA	Not done
T08P01D08		Chrom	100457	Reverse	BB0102	Forward	100228	100749	0.441459	conserved hypothetical protein		AATTCCAATA--TATACATACA	Not done
T03TC127		Chrom	100509	Reverse	BB0102	Forward	100228	100749	0.541267	conserved hypothetical protein		ATTTAGGCAA--TAATATCAAT	Complete
T07TC367		Chrom	100652	Reverse	BB0102	Forward	100228	100749	0.815739	conserved hypothetical protein		ACTCACATGC--TAATCGGCCC	lp5
T04TC417	same site: T04TC417, T05TC013	Chrom	100724	Reverse	BB0102	Forward	100228	100749	0.953935	conserved hypothetical protein		TACACTTTAA--TAGAATACAT	lp28-1
T11TC144		Chrom	108496	Forward	BB0110	Forward	108307	109671	0.138563	conserved hypothetical protein		TATTTTTACC--TATGTTTCAA	lp5
T03TC328		Chrom	108731	Reverse	BB0110	Forward	108307	109671	0.311584	conserved hypothetical protein		ATGCAAAGCA--TAATTCACCT	cp9
T04TC326		Chrom	108859	Reverse	BB0110	Forward	108307	109671	0.405425	conserved hypothetical protein		TTTAGAAAAT--TATATGGACT	lp5
T06TC500		Chrom	109564	Forward	BB0110	Forward	108307	109671	0.921554	conserved hypothetical protein		TTTCAAAATA--TATTCAAAAG	Not done
T03TC342		Chrom	109589	Forward	BB0110	Forward	108307	109671	0.939883	conserved hypothetical protein		TATATTCCTA--TAGCTTATAA	lp5
T06TC366		Chrom	109676	Reverse	BB0111	Reverse	111042	109675	0.998537	replicative DNA helicase	dnaB	AAATAACAAC--TAATACTGGT	lp5
T08P01C05	T08P01C05, T08P02E04	Chrom	113341	Forward	BB0116	Reverse	114633	112909	0.74942	PTS system, maltose and glucose-specific IIABC component	malX-1	CTGTAACAAA--TATCTGAAAA	Not done
T06TC105		Chrom	113730	Reverse	BB0116	Reverse	114633	112909	0.523202	PTS system, maltose and glucose-specific IIABC component	malX-1	AGTCCAAACA--TAATAGATAG	lp5
T08TC001		Chrom	114115	Reverse	BB0116	Reverse	114633	112909	0.299884	PTS system, maltose and glucose-specific IIABC component	malX-1	AAGGTTTGGG--TAGCTTCATA	cp9,lp5
T09TC132		Chrom	114471	Reverse	BB0116	Reverse	114633	112909	0.0933875	PTS system, maltose and glucose-specific IIABC component	malX-1	TAAACAATAC--TAGAAGAATT	lp28-1
T06TC049		Chrom	114544	Reverse	BB0116	Reverse	114633	112909	0.0510441	PTS system, maltose and glucose-specific IIABC component	malX-1	TAGGCACTCG--TAGTGCTTTA	Complete
T05TC381		Chrom	114679	Reverse	IR BB0116-BB0117	0	114634	114806	0.267442	Intergenic Region	0	AAACTTTACT--TACTACACAA	cp9	lp5
T04TC365		Chrom	114973	Reverse	BB0117	Forward	114807	115508	0.238231	membrane protein	yplQ	AAAAAAGATT--TACATGTAGT	Complete
T07TC284		Chrom	115015	Reverse	BB0117	Forward	114807	115508	0.298146	membrane protein	yplQ	TCAATGACCC--TATTATATGT	cp9,lp5	lp17
T06P01C08	T06P01C08, T06P01D06, T06P01E04, T06P01E05, T06P01E06, T06P01F04, T06P01G04; same site: T04TC181	Chrom	115018	Reverse	BB0117	Forward	114807	115508	0.302425	membrane protein	yplQ	ATGACCCTAT--TATATGTAAT	Not done
T08TC080		Chrom	116341	Reverse	BB0118	Reverse	116818	115505	0.362529	RIP metalloprotease	rseP	TTTTTATCAT--TAACCTTTAA	Complete
T10TC306		Chrom	116458	Reverse	BB0118	Reverse	116818	115505	0.27342	RIP metalloprotease	rseP	CTTATAAAAA--TAAAAACAAT	lp28-1
T11TC303		Chrom	132172	Reverse	BB0134	Forward	131277	132425	0.780488	tetratricopeptide repeat domain protein		GATCCATCAA--TATATTCAAA	Not done
T03TC163		Chrom	132235	Reverse	BB0134	Forward	131277	132425	0.835366	tetratricopeptide repeat domain protein		AAAGATAACA--TAATTCAATT	lp5
T07TC281		Chrom	132343	Reverse	BB0134	Forward	131277	132425	0.929443	tetratricopeptide repeat domain protein		AATGTTGAAA--TACTTGGACA	lp5
T05TC627		Chrom	137925	Reverse	BB0138	Reverse	138089	137880	0.779904	conserved hypothetical protein		AAAAATATTT--TAATAAAAAA	lp5
T06TC143		Chrom	139216	Reverse	BB0140	Reverse	141960	138850	0.881994	Borrelia efflux system protein B	BesB	CAAGAAAATG--TATAAGCACA	cp9
T05TC271		Chrom	139329	Reverse	BB0140	Reverse	141960	138850	0.845659	Borrelia efflux system protein B	BesB	ATAGCCATCA--TAATGATTAT	cp9
T06TC563		Chrom	139336	Reverse	BB0140	Reverse	141960	138850	0.843408	Borrelia efflux system protein B	BesB	TCATAATGAT--TATTTTAAAC	Complete
T04TC254		Chrom	139419	Forward	BB0140	Reverse	141960	138850	0.817042	Borrelia efflux system protein B	BesB	TGGGGCACCT--TATTATTAAT	Complete
T07TC392		Chrom	139659	Forward	BB0140	Reverse	141960	138850	0.739871	Borrelia efflux system protein B	BesB	TTAAGAACAA--TATCATAATT	lp5
T04TC346		Chrom	140092	Forward	BB0140	Reverse	141960	138850	0.600643	Borrelia efflux system protein B	BesB	CGTTGAAAGT--TATTCTATCA	cp9,lp5
T05TC350		Chrom	140118	Forward	BB0140	Reverse	141960	138850	0.592283	Borrelia efflux system protein B	BesB	AAAGTAGCAA--TAATACTTTT	lp21
T06TC058		Chrom	140388	Reverse	BB0140	Reverse	141960	138850	0.505145	Borrelia efflux system protein B	BesB	AAATAATAAA--TACTAGCAAA	lp5
T04TC401		Chrom	140634	Reverse	BB0140	Reverse	141960	138850	0.426045	Borrelia efflux system protein B	BesB	GTTGAAGATG--TAATAGGCAA	Complete
T09TC050		Chrom	140710	Forward	BB0140	Reverse	141960	138850	0.401929	Borrelia efflux system protein B	BesB	TATATTTGTA--TATATTGTCT	lp5
T09TC036		Chrom	141312	Reverse	BB0140	Reverse	141960	138850	0.208039	Borrelia efflux system protein B	BesB	TTCTCCAATA--TATTGCCAGC	cp9,lp5
T11TC385		Chrom	141500	Forward	BB0140	Reverse	141960	138850	0.14791	Borrelia efflux system protein B	BesB	TTCATCGGCA--TATCTTTTAA	lp5
T07TC263		Chrom	141943	Reverse	BB0140	Reverse	141960	138850	0.00514469	Borrelia efflux system protein B	BesB	GTTTGCCAAC--TATTCTCTTT	cp9	lp28-3,lp17
T08TC099		Chrom	142557	Reverse	BB0141	Reverse	142935	141979	0.394351	Borrelia efflux system protein A	BesA	ATATTTAAAA--TATATCCTGA	cp9,lp5
T08TC113		Chrom	142800	Reverse	BB0141	Reverse	142935	141979	0.140167	Borrelia efflux system protein A	BesA	ACTGGGAATC--TATAGGAACT		lp5
T06TC059		Chrom	142879	Reverse	BB0141	Reverse	142935	141979	0.0575314	Borrelia efflux system protein A	BesA	AAACTAAGAA--TAAAACTAAA	lp5
T05TC307		Chrom	143084	Forward	BB0142	Reverse	144266	142944	0.8941	Borrelia efflux system protein C	BesC	ACCCCGGAAT--TAAAAGCATT	lp21,lp28-1,lp5
T11TC359		Chrom	143235	Reverse	BB0142	Reverse	144266	142944	0.779123	Borrelia efflux system protein C	BesC	CATTGTTTTG--TAGTATTTTT	Not done
T10TC092		Chrom	143304	Forward	BB0142	Reverse	144266	142944	0.727685	Borrelia efflux system protein C	BesC	ATATTTCAGT--TAAACCATAA	lp5
T05TC630		Chrom	143826	Forward	BB0142	Reverse	144266	142944	0.332829	Borrelia efflux system protein C	BesC	TAAGAACATT--TAGCTTGATA	lp28-1,lp5
T08TC002		Chrom	144289	Forward	IR BB0142-BB0143	0	144267	144306	0.564103	Intergenic Region	0	ATTATTATAA--TATAATACAA	cp9,lp28-1
T06TC417		Chrom	144595	Reverse	BB0144	Reverse	145458	144586	0.988532	glycine betaine, L-proline ABC transporter, periplasmic binding protein	proX	ATTAATCAAA--TAAGGTCTTA	cp9, lp5
T03TC228		Chrom	145716	Reverse	BB0145	Reverse	146370	145471	0.726363	glycine betaine, L-proline ABC transporter, permease protein	proW	ATCATAGATA--TAGCCATCAT	Complete
T07TC340		Chrom	150836	Forward	BB0150	Reverse	150897	150805	0.663043	hypothetical protein		AAACAAAATA--TAATGTATAA	lp5
T06TC359		Chrom	150940	Forward	IR BB0150-BB0151	0	150898	150973	0.56	Intergenic Region	0	TTAATGCTTA--TAGTAAAATA	Complete
T07TC102		Chrom	153145	Forward	BB0153	Reverse	153719	153075	0.891304	superoxide dismutase	sodA	TGCATCAACA--TATTCAATTC	cp9,lp5
T03TC039		Chrom	153217	Reverse	BB0153	Reverse	153719	153075	0.77795	superoxide dismutase	sodA	AATCGGCTTA--TAAGAATTCA	lp28-1,lp5
T04TC042		Chrom	153326	Forward	BB0153	Reverse	153719	153075	0.610248	superoxide dismutase	sodA	TTCATTGCAG--TATCTTTCAA	lp21,lp38
T08TC433		Chrom	157928	Reverse	BB0156	Forward	157627	158061	0.695853	conserved hypothetical protein		TTGCTTTATA--TAAGCAGCAA	cp32-6,lp5
T09TC514		Chrom	157951	Reverse	BB0156	Forward	157627	158061	0.748848	conserved hypothetical protein		CTTTACAACA--TATGCTAATA	lp5
T11TC240		Chrom	157961	Reverse	BB0156	Forward	157627	158061	0.771889	conserved hypothetical protein		TATGCTAATA--TAATCTATCA		lp5
T04TC231	same site: T04TC231, T09TC262	Chrom	157994	Reverse	BB0156	Forward	157627	158061	0.847926	conserved hypothetical protein		TTAAGTATAA--TATTAAAGAG	cp32-3,cp32-6,lp5
T05TC360		Chrom	158215	Reverse	BB0157	Forward	158058	158474	0.379808	conserved hypothetical protein		ATTTTTGGAT--TATTATTTTT		lp5
T04TC060		Chrom	158429	Forward	BB0157	Forward	158058	158474	0.891827	conserved hypothetical protein		TATCAATCAC--TATAGGAATA	lp28-2
T06TC352		Chrom	158549	Reverse	IR BB0157-BB0158	0	158475	158627	0.493421	Intergenic Region	0	ATTAGCATTC--TATATTATTA	cp9,lp5
T08TC271		Chrom	158732	Forward	BB0158	Forward	158628	159344	0.145251	S2 lipoprotein		AAGACAGCAA--TACTGGCAAA	lp5
T08TC089		Chrom	158834	Forward	BB0158	Forward	158628	159344	0.287709	S2 lipoprotein		TAACTTGGAT--AAAAACAAAG		lp5	anomolous transposition event
T08TC640		Chrom	158917	Forward	BB0158	Forward	158628	159344	0.403631	S2 lipoprotein		TCTTATATAA--TATCTCCTGT	lp5
T05TC050		Chrom	159199	Forward	BB0158	Forward	158628	159344	0.797486	S2 lipoprotein		CTTGCAGATT--TAACTGTCAA	cp9	lp5
T04TC111		Chrom	159611	Forward	BB0159	Forward	159368	160042	0.360534	conserved hypothetical protein		AGGGATTAGT--TATTCATTTA		cp9
T10TC480		Chrom	159717	Reverse	BB0159	Forward	159368	160042	0.519288	conserved hypothetical protein		TTAGAATTTT--TAAGTCCAGA	lp5
T11TC107		Chrom	159760	Forward	BB0159	Forward	159368	160042	0.581602	conserved hypothetical protein		TAAGCAGCCT--TACTAGTGGA	lp5
T10TC134		Chrom	159962	Forward	BB0159	Forward	159368	160042	0.881306	conserved hypothetical protein		CCCTAAAATA--TATAATGATT	cp32-7
T09TC216		Chrom	160087	Reverse	IR BB0159-BB0160	0	160043	160089	0.978261	Intergenic Region	0	CTAAGAGAGC--TAAATGTATA	lp5
T05TC388		Chrom	161369	Reverse	BB0161	Reverse	162864	161200	0.897837	conserved hypothetical protein		TTCATATTTA--TAAACACTAA	lp28-1	lp5
T08TC078		Chrom	161654	Forward	BB0161	Reverse	162864	161200	0.727163	conserved hypothetical protein		GTCGTAAGAG--TATCTATAAA	Complete
T07TC440		Chrom	161952	Forward	BB0161	Reverse	162864	161200	0.548077	conserved hypothetical protein		TTGTCGTAAT--TATATTCCTT	Complete
T04TC116		Chrom	162002	Reverse	BB0161	Reverse	162864	161200	0.517428	conserved hypothetical protein		TTCATAACGA--TAAATTGCTA	lp5
T06P01F02	T06P01F02, T06P01G01	Chrom	162106		BB0161	Forward	161200	162864	0.544471	conserved hypothetical protein		TTAGTAGC--TACAGAAAATG	Complete
T08TC073		Chrom	162296	Forward	BB0161	Reverse	162864	161200	0.341346	conserved hypothetical protein		CTTTGTAAAA--TACACATTAT	Complete
T04TC396		Chrom	162373	Forward	BB0161	Reverse	162864	161200	0.295072	conserved hypothetical protein		CATTGTCGTA--TAAAAAATGA	Complete
T10TC287		Chrom	162472	Reverse	BB0161	Reverse	162864	161200	0.234976	conserved hypothetical protein		TCATATACTC--TATATGTTCA	Complete
T11TC116		Chrom	163769	Reverse	BB0163	Reverse	164820	163072	0.600686	conserved hypothetical protein		AAAAGGCTTG--TACAAATAAA	Complete
T05TC093		Chrom	164874	Forward	IR BB0163-BB0164	0	164821	164900	0.670886	Intergenic Region	0	AAAAATATAT--TAACAAGTCA	Complete
T11P02D04		Chrom	164997	Reverse	BB0164	Reverse	165914	164901	0.904245	Na+/Ca+ exchange protein, putative		ATTTAACCAC--TAAAAATAAA	cp32-6, lp5
T10TC404		Chrom	166239	Reverse	BB0165	Reverse	167759	165915	0.823753	conserved hypothetical protein		ACATAGGAGA--TATGACGTCA	Complete
T05TC451		Chrom	166286	Forward	BB0165	Reverse	167759	165915	0.798807	conserved hypothetical protein		TGCCCAATAC--TATTAGTAGG	Complete
T05TC448		Chrom	167396	Forward	BB0165	Reverse	167759	165915	0.196855	conserved hypothetical protein		CTAGATGTAA--TATATGCACC	Complete
T07TC032		Chrom	167689	Reverse	BB0165	Reverse	167759	165915	0.0374187	conserved hypothetical protein		GGTTAATGAA--TATATACTAA	lp28-1
T05TC531		Chrom	167770	Forward	IR BB0165-BB0166	0	167760	167878	0.0847458	Intergenic Region	0	TAATACATGA--TACTTGCAAA	lp28-1,lp5
T10TC505		Chrom	168540	Reverse	BB0166	Reverse	169399	167879	0.564474	4-alpha-glucanotransferase	malQ	CCACCATTCA--TACTTAAATT		lp5
T06TC271		Chrom	168892	Forward	BB0166	Reverse	169399	167879	0.333553	4-alpha-glucanotransferase	malQ	AAAAGAACAT--TAAAAGCATT	lp5
T05TC131	same site: T05TC131, T06TC167	Chrom	169314	Reverse	BB0166	Reverse	169399	167879	0.0552632	4-alpha-glucanotransferase	malQ	TCCAATGCCA--TATTTAGATG	cp9	lp5
T05TC504		Chrom	169454	Forward	IR BB0166-BB0167	0	169400	169538	0.391304	Intergenic Region	0	TTATAAATTA--TAATAAATAT	Complete
T06TC121		Chrom	169479	Reverse	IR BB0166-BB0167	0	169400	169538	0.57971	Intergenic Region	0	CAGAACAACA--TATTAAATAG	Complete
T06TC217		Chrom	169819	Reverse	BB0167	Forward	169539	170708	0.240376	outer membrane protein	tpn50	TACCTATTAA--ATGAAGAGTT	Complete		anomolous transposition event
T03TC114		Chrom	170027	Forward	BB0167	Forward	169539	170708	0.417451	outer membrane protein	tpn50	AATTTAATGT--TAACTACGAA	lp5
T03TC090		Chrom	170180	Reverse	BB0167	Forward	169539	170708	0.549187	outer membrane protein	tpn50	GCAATACATA--TAAATACAGC	lp5
T04TC113		Chrom	170294	Reverse	BB0167	Forward	169539	170708	0.646707	outer membrane protein	tpn50	ATGATAATCT--TATTGAAACT	lp21
T04TC003		Chrom	170539	Reverse	BB0167	Forward	169539	170708	0.856287	outer membrane protein	tpn50	ATGCACGAGC--TATCTGAAAA	lp38,cp9,lp28-1
T08P01C11		Chrom	179411	Reverse	BB0177	Reverse	179543	178917	0.209265	glucose inhibited division protein B	gidB	AAATTGCTAT--TACTATTTGA	Complete
T03TC242		Chrom	186790	Reverse	BB0183	Forward	186554	186946	0.604592	flagellar assembly protein	fliW-1	ATGAAAAAGT--TATACTATGC	lp5
T08TC211		Chrom	186795	Forward	BB0183	Forward	186554	186946	0.614796	flagellar assembly protein	fliW-1	AAAGTTATAC--TATGCATAAT	cp9,lp5
T04TC034		Chrom	191508	Reverse	IR BB0193-BB0194	0	191460	191517	0.859649	Intergenic Region	0	TAAATAATTA--TAAATAAAAT	cp9,lp5
T11TC479		Chrom	191552	Reverse	BB0194	Reverse	192327	191518	0.956737	hydrolase, TatD family		AAAGCTATTA--TATACTGCAA	Not done
T08TC647		Chrom	191871	Reverse	BB0194	Reverse	192327	191518	0.562423	hydrolase, TatD family		CTTACAATAT--TATAGACATC	lp5
T07TC427		Chrom	191896	Reverse	BB0194	Reverse	192327	191518	0.53152	hydrolase, TatD family		AGGCATCTCT--TATATGCAAA	Complete
T09TC398		Chrom	192221	Reverse	BB0194	Reverse	192327	191518	0.12979	hydrolase, TatD family		ATTAATAATG--TAATTGACAT		lp5
T04TC062		Chrom	192247	Reverse	BB0194	Reverse	192327	191518	0.0976514	hydrolase, TatD family		ATCTTTTCTT--TAATTCATAA	Complete
T09TC294		Chrom	192270	Reverse	BB0194	Reverse	192327	191518	0.0692213	hydrolase, TatD family		TGAACATGAG--TATCTATTAA	lp5
T07TC352		Chrom	194895	Forward	BB0197	Forward	194876	195736	0.022093	protoporphyrinogen oxidase, putative		AACGAAGTTA--TAAATTATGC		lp38
T11TC155		Chrom	195075	Forward	BB0197	Forward	194876	195736	0.231395	protoporphyrinogen oxidase, putative		ATTCACTACA--TACTTCAAAA	cp9	lp28-1
T07TC218		Chrom	195213	Forward	BB0197	Forward	194876	195736	0.39186	protoporphyrinogen oxidase, putative		ATATTAGACT--TATGCTGCGG	lp5
T05TC184		Chrom	195964	Reverse	BB0198	Forward	195693	197696	0.135796	guanosine-3,5-bis(diphosphate) 3-pyrophosphohydrolase	spoT	CTGCATGACG--TACTTGAAGA	Complete
T08TC487		Chrom	202768	Forward	IR BBtRNA-Cys-1-BB0202	0	202766	202849	0.0240964	Intergenic Region	0	CAGCGCCTTC--TAAGATCAAG	Complete
T11TC205		Chrom	202797	Forward	IR BBtRNA-Cys-1-BB0202	0	202766	202849	0.373494	Intergenic Region	0	TTTTTATACT--TAAGGACATA	lp5	lp28-1
T08TC535		Chrom	202830	Reverse	IR BBtRNA-Cys-1-BB0202	0	202766	202849	0.783133	Intergenic Region	0	TTATTAAAGA--TAAATTAAAA	lp5
T07TC262	same site T07TC262, T10TC470	Chrom	202847	Reverse	IR BBtRNA-Cys-1-BB0202	0	202766	202849	0.987952	Intergenic Region	0	AAATAATACA--TATATGCTAG	cp9
T09TC411		Chrom	202849	Forward	IR BBtRNA-Cys-1-BB0202	0	202766	202849	1	Intergenic Region	0	ATAATACATA--TATGCTAGAA		lp5
T10TC491		Chrom	202866	Reverse	BB0202	Forward	202850	204088	0.0137318	hemolysin, putative		GAATTAATCA--TAATACTACT	lp28-1
T03TC291		Chrom	202869	Forward	BB0202	Forward	202850	204088	0.0153473	hemolysin, putative		TTAATCATAA--TACTACTATT	Complete
T03TC345	same site: T03TC345, T08TC653	Chrom	202872	Forward	BB0202	Forward	202850	204088	0.0177706	hemolysin, putative		ATCATAATAC--TACTATTTAT	lp21	lp5
T08TC653	same site: T03TC345, T08TC653	Chrom	202894	Forward	BB0202	Forward	202850	204088	0.0355412	hemolysin, putative		TATTATCTGC--TATTTTCTCA	lp5
T09TC377	T09TC377, T09TC530; same site T10TC366, T10TC382, T10TC410, T06TC491	Chrom	202919	Forward	BB0202	Forward	202850	204088	0.0557351	hemolysin, putative		TGAAACAGCT--TATACTTCAT		cp9
T05TC304		Chrom	202977	Reverse	BB0202	Forward	202850	204088	0.103393	hemolysin, putative		AAATCGGGAA--TATCCGTGTA	lp38,lp21
T06TC338		Chrom	203023	Forward	BB0202	Forward	202850	204088	0.139742	hemolysin, putative		TAATTACTAC--TATTCTTATC	lp5
T08TC125		Chrom	203039	Forward	BB0202	Forward	202850	204088	0.152666	hemolysin, putative		TATCGGCAAC--AATATATCAA	cp9,lp5		anomolous transposition event
T01P01A02		Chrom	203068	Reverse	BB0202	Forward	202850	204088	0.17609	hemolysin, putative		CAAGCACACT--TACAACAAAA	cp9,lp5
T09TC049		Chrom	203258	Forward	BB0202	Forward	202850	204088	0.329564	hemolysin, putative		TCCACTAATA--TATATAATAA	Complete
T09TC383		Chrom	203427	Reverse	BB0202	Forward	202850	204088	0.466882	hemolysin, putative		ATAGATCAAG--TAAGAGCTTC	Complete
T08TC363		Chrom	203499	Forward	BB0202	Forward	202850	204088	0.524233	hemolysin, putative		CTAAAAGATG--TAATCAAATT	lp5
T06TC525		Chrom	203539	Reverse	BB0202	Forward	202850	204088	0.557351	hemolysin, putative		CTAGAATTCC--TATATACAAA	Not done
T09TC443		Chrom	203543	Forward	BB0202	Forward	202850	204088	0.559774	hemolysin, putative		AATTCCTATA--TACAAAGGAC	lp5
T10TC523		Chrom	203568	Forward	BB0202	Forward	202850	204088	0.579968	hemolysin, putative		AGAGAACAGA--TAATTGGGAT	cp32-1,cp32-7,lp38	lp28-3
T09TC406		Chrom	203688	Forward	BB0202	Forward	202850	204088	0.676898	hemolysin, putative		ATAAAAGACA--TACTAGATAT		lp5
T07TC207	same site: T07TC207, T08TC238	Chrom	203769	Forward	BB0202	Forward	202850	204088	0.742326	hemolysin, putative		ATACTTACAA--TAGAAGACAT	Complete
T10TC354		Chrom	203802	Forward	BB0202	Forward	202850	204088	0.768982	hemolysin, putative		TTTGGAGCAA--TATCTGACGA		cp32-8,lp5
T06TC283		Chrom	203821	Forward	BB0202	Forward	202850	204088	0.78433	hemolysin, putative		AATACGACAT--TAAAGAGGAA	cp9,lp28-1,lp5
T10TC413		Chrom	203860	Reverse	BB0202	Forward	202850	204088	0.81664	hemolysin, putative		TCAACGACAA--TACTTACTCA	lp5
T06TC531		Chrom	203864	Reverse	BB0202	Forward	202850	204088	0.819871	hemolysin, putative		CGACAATACT--TACTCAATAC	Not done
T10TC332		Chrom	203918	Reverse	BB0202	Forward	202850	204088	0.863489	hemolysin, putative		AATTGGGATA--TCCATTAAAC	lp5		anomolous transposition event
T10TC466		Chrom	203961	Forward	BB0202	Forward	202850	204088	0.897415	hemolysin, putative		GGTGGATACT--TAATAGATCT	Complete
T06TC284		Chrom	204237	Reverse	BB0203	Forward	204137	205072	0.108021	Lambda CII stability-governing protein	hflK	AACATATTCA--TAGTAGGGCC	lp28-1,lp5
T06TC518		Chrom	204384	Reverse	BB0203	Forward	204137	205072	0.265241	Lambda CII stability-governing protein	hflK	TTTGGATTTC--TAATATCTCC	Not done
T07TC220		Chrom	204592	Reverse	BB0203	Forward	204137	205072	0.487701	Lambda CII stability-governing protein	hflK	GGGATAATAC--TATTTTTGAA		cp9
T03TC003		Chrom	204673	Forward	BB0203	Forward	204137	205072	0.573262	Lambda CII stability-governing protein	hflK	TAGATAATTA--TAATTTAGGC	Complete
T03TC008	T03TC008, T03TC098; same site T04TC375	Chrom	204789	Forward	BB0203	Forward	204137	205072	0.697326	Lambda CII stability-governing protein	hflK	AATAAATACA--TAAACGAAGG	cp32-7,lp21	lp5
T04TC268		Chrom	205105	Forward	BB0204	Forward	205073	206044	0.0329557	Lambda CII stability-governing protein	hflC	TATTATCTAC--TATAAAGATT	Complete
T08TC040		Chrom	205114	Forward	BB0204	Forward	205073	206044	0.0422245	Lambda CII stability-governing protein	hflC	CTATAAAGAT--TATAACCTTT		lp5
T05TC393		Chrom	205528	Forward	BB0204	Forward	205073	206044	0.468589	Lambda CII stability-governing protein	hflC	CAAACGATCC--TATTCAACGT	Complete
T03TC054		Chrom	205635	Reverse	BB0204	Forward	205073	206044	0.579815	Lambda CII stability-governing protein	hflC	ATAATTCGTA--TAGCAAACAA	Complete
T07TC321		Chrom	206053	Forward	IR BB0204-BB0205	0	206045	206528	0.0165631	Intergenic Region	0	GAAAGTTTAT--TAGTATAAAT	lp5
T11TC464		Chrom	206104	Reverse	IR BB0204-BB0205	0	206045	206528	0.124224	Intergenic Region	0	ATTAATCTAT--TATTATAGAT	Not done
T09TC174		Chrom	209622	Forward	BB0208	Forward	209529	211274	0.0532951	conserved hypothetical protein		AGTTTTAAAA--TATAGCATTT	Complete
T11TC231		Chrom	209643	Reverse	BB0208	Forward	209529	211274	0.0659026	conserved hypothetical protein		TTCCCAGCTT--TACAAATTAG	Complete
T06TC227		Chrom	210001	Reverse	BB0208	Forward	209529	211274	0.27106	conserved hypothetical protein		GAACAAACAA--TAGATATTCT	cp32-9,cp9
T06TC241		Chrom	210348	Reverse	BB0208	Forward	209529	211274	0.469914	conserved hypothetical protein		TAGCTTTAAT--TATTTTTTTA	lp28-1
T05TC125		Chrom	210884	Forward	BB0208	Forward	209529	211274	0.776504	conserved hypothetical protein		ATTTCAAATT--TATATCAGAC	Complete
T08TC136	same site: T08TC136, T10TC223	Chrom	210895	Forward	BB0208	Forward	209529	211274	0.782808	conserved hypothetical protein		ATATCAGACA--TACTACTCTA	cp32-7,lp5
T10P01B12		Chrom	210898	Reverse	BB0208	Forward	209529	211274	0.7851	conserved hypothetical protein		TCAGACATAC--TACTCTACCT	Not done
T07TC118		Chrom	211286	Forward	IR BB0208-BB0209	0	211275	211300	0.44	Intergenic Region	0	CTAAAATAAG--TATAATGGGA	cp9,lp5
T06P01D01		Chrom	215546	Forward	BB0211	Forward	215427	217259	0.0649563	DNA mismatch repair protein	mutL	ATTCTGGAGC--TACTAAAATT	cp32-6,lp5	cp9
T03TC297		Chrom	215596	Reverse	BB0211	Forward	215427	217259	0.0927948	DNA mismatch repair protein	mutL	AAAATCTTAA--TAATAGATAA	lp21
T10TC315		Chrom	215800	Forward	BB0211	Forward	215427	217259	0.203603	DNA mismatch repair protein	mutL	CAAATAGAAG--TAGAAAATGG	lp21,lp5
T06TC456		Chrom	216161	Forward	BB0211	Forward	215427	217259	0.400655	DNA mismatch repair protein	mutL	CTAAAAAAAG--TAAAAGACAT	lp28-1
T08TC459		Chrom	216340	Reverse	BB0211	Forward	215427	217259	0.498908	DNA mismatch repair protein	mutL	AAAAAAGAAG--TAAGATTTTA	lp5
T04TC405		Chrom	216466	Reverse	BB0211	Forward	215427	217259	0.567686	DNA mismatch repair protein	mutL	GATGATCATT--TAATAGAAAT	cp9	lp5
T07TC054		Chrom	216865	Forward	BB0211	Forward	215427	217259	0.784934	DNA mismatch repair protein	mutL	AAACTTCTAG--TACCAATTGA	lp28-1,lp5
T06TC508		Chrom	217535	Forward	BB0212	Forward	217278	218312	0.248549	hypothetical protein		AATCTACTAG--TAAATCATAT	lp21
T11P01C07	T11P01E12, T11P01G07. T11P01C07, T11P02A08, T11P02C01	Chrom	217609	Reverse	BB0212	Forward	217278	218312	0.321083	hypothetical protein		CTAGAATTAA--TATCAAAATA	Complete
T04TC440		Chrom	217699	Reverse	BB0212	Forward	217278	218312	0.408124	hypothetical protein		AAAAATTATT--TACAAAGAAT	lp5
T08TC185		Chrom	218009	Forward	BB0212	Forward	217278	218312	0.706963	hypothetical protein		AAATCAATGT--TATTACAAAA	lp28-1,lp5
T05TC158		Chrom	226998	Forward	BB0221	Reverse	227836	226610	0.683524	flagellar motor switch protein	fliG-1	AAAATCCATA--TAGCTTAAAA	Complete
T08TC068		Chrom	227214	Forward	BB0221	Reverse	227836	226610	0.507341	flagellar motor switch protein	fliG-1	TAAATAATTA--TATAATATAA	Complete
T08TC546		Chrom	227357	Forward	BB0221	Reverse	227836	226610	0.390701	flagellar motor switch protein	fliG-1	TAGATTTTCC--TAACGTTTTA	lp5
T08TC645		Chrom	227365	Forward	BB0221	Reverse	227836	226610	0.384176	flagellar motor switch protein	fliG-1	CCTAACGTTT--TATTTAATAA	Complete
T04TC063		Chrom	227426	Forward	BB0221	Reverse	227836	226610	0.334421	flagellar motor switch protein	fliG-1	GATTTCTTAG--TAACTCTTCA	lp38
T08TC578		Chrom	228543	Reverse	BB0223	Reverse	228895	228542	0.994334	conserved hypothetical protein		TAATACATAT--TAATCTAAAT	lp5
T10TC435		Chrom	228555	Forward	BB0223	Reverse	228895	228542	0.963173	conserved hypothetical protein		ATCTAAATAA--TAATAAATAG	lp5
T11TC261		Chrom	228782	Reverse	BB0223	Reverse	228895	228542	0.31728	conserved hypothetical protein		AATAATATCT--TAAATCTCTA	lp5
T10TC516		Chrom	228889	Reverse	BB0224	Reverse	229148	228864	0.908451	lipoprotein, putative		ATTAAAGCAA--TATACATACA	Complete
T08TC632		Chrom	228891	Reverse	BB0224	Reverse	229148	228864	0.901408	lipoprotein, putative		TAAAGCAATA--TACATACATA	lp5
T06TC502	same site: T06TC502, T10TC427	Chrom	228895	Reverse	BB0224	Reverse	229148	228864	0.887324	lipoprotein, putative		GCAATATACA--TACATATTTA	Not done
T05P01G01		Chrom	228899	Reverse	BB0224	Reverse	228864	229148	0.876761	lipoprotein, putative		TATACATACA--TATTTAATAA	lp5
T04TC291		Chrom	228923	Forward	BB0224	Reverse	229148	228864	0.792254	lipoprotein, putative		GCTTTAATCT--TAGATAAATT	lp5
T08TC628		Chrom	229150	Forward	IR BB0224-BB0225	0	229149	229216	0.0149254	Intergenic Region	0	TCCAGGCATA--TAACAATTCC	lp28-1,lp5
T04P01A04		Chrom	229213	Forward	IR BB0224-BB0225	0	229149	229216	0.955224	Intergenic Region	0	TAACATATTA--TATAATGTTA	Complete
T10TC325		Chrom	229314	Forward	BB0225	Forward	229217	230224	0.0963257	tRNA-dihydrouridine synthase A		AAAGTTACAT--TATATACCCC	cp9,lp28-1,lp38
T03TC027		Chrom	229555	Forward	BB0225	Forward	229217	230224	0.33565	tRNA-dihydrouridine synthase A		TGGGCAATGC--TAATCAAGTA	Complete
T09TC361		Chrom	232335	Forward	IR BB0227-BB0228	0	232323	232337	0.857143	Intergenic Region	0	ATTAAAGACA--TAAATGAAAA	lp21	lp5
T06TC362		Chrom	232615	Forward	BB0228	Forward	232338	235253	0.0950257	peptidase M16 inactive domain family		AACACATTTT--TAAATGCAAT	lp21,lp5
T09TC296		Chrom	232709	Forward	BB0228	Forward	232338	235253	0.127273	peptidase M16 inactive domain family		ATGCCGATTC--TATATTTAAC	lp5
T07TC356		Chrom	232814	Forward	BB0228	Forward	232338	235253	0.163293	peptidase M16 inactive domain family		AAATGAAGGG--TAGCTATTCA	lp5
T09TC362		Chrom	232840	Reverse	BB0228	Forward	232338	235253	0.172556	peptidase M16 inactive domain family		AATTCTCTAA--TAAATGAAAT	lp21
T11TC390		Chrom	233078	Forward	BB0228	Forward	232338	235253	0.253859	peptidase M16 inactive domain family		GCAATGTCAA--TATTAACATA	Not done
T08TC455		Chrom	233332	Reverse	BB0228	Forward	232338	235253	0.341338	peptidase M16 inactive domain family		AATACAGATT--TAAAAGAATC	Complete
T08TC671		Chrom	233589	Forward	BB0228	Forward	232338	235253	0.42916	peptidase M16 inactive domain family		ACAAACAAGC--TACTATATAA	lp21
T08TC591		Chrom	233606	Reverse	BB0228	Forward	232338	235253	0.435334	peptidase M16 inactive domain family		TAAATGAAAT--TACAAATAAA		lp5
T08TC615		Chrom	233858	Forward	BB0228	Forward	232338	235253	0.521441	peptidase M16 inactive domain family		CTAAAGCAGA--TATAGCAAAA		lp5
T09TC076		Chrom	233932	Forward	BB0228	Forward	232338	235253	0.546827	peptidase M16 inactive domain family		CTTAATGAAA--TAAAAGAGCT	cp9
T07TC474		Chrom	234027	Forward	BB0228	Forward	232338	235253	0.579417	peptidase M16 inactive domain family		AAAAGAAGAT--TACATATACC	Complete
T08TC549	same site: T08TC549, T10P02G06	Chrom	234954	Reverse	BB0228	Forward	232338	235253	0.89777	peptidase M16 inactive domain family		TGATGAGATT--TATACCTATT	Complete
T10TC373		Chrom	234983	Reverse	BB0228	Forward	232338	235253	0.907719	peptidase M16 inactive domain family		TAATAGGAAC--TAACATCTAT		lp5
T10P01C11		Chrom	238777	Forward	BB0234	Reverse	239128	238301	0.424426	conserved hypothetical integral membrane protein		TTAAGCTCTT--TAAATAATTC	Not done
T08P02A01		Chrom	245552	Forward	IR BB0239-BB0240	0	245395	245789	0.398477	Intergenic Region	0	TTAAAATTCT--TAAATTATTG	Not done
T08TC322		Chrom	245783	Forward	IR BB0239-BB0240	0	245395	245789	0.984772	Intergenic Region	0	GATAAGGAGA--TATAATTATG	lp5
T08TC577		Chrom	245881	Reverse	BB0240	Forward	245790	246554	0.120419	glycerol uptake facilitator	glpF	GCAATGACAG--TATTATTTTC	lp5	lp28-1
T09TC379		Chrom	245917	Reverse	BB0240	Forward	245790	246554	0.167539	glycerol uptake facilitator	glpF	CCAGGAGAAA--TAATAAAAGG	Complete
T08TC132		Chrom	245939	Forward	BB0240	Forward	245790	246554	0.195026	glycerol uptake facilitator	glpF	GATATACAAA--TATAGTATTT	Complete
T09TC330	T09TC330, T09TC376	Chrom	246023	Forward	BB0240	Forward	245790	246554	0.304974	glycerol uptake facilitator	glpF	ACCCAGCTGT--TAGCATAGGA	Complete
T10TC407		Chrom	246328	Forward	BB0240	Forward	245790	246554	0.704188	glycerol uptake facilitator	glpF	CCTTTTATTG--TAGGAGCAGT		lp5
T11TC356		Chrom	246452	Forward	BB0240	Forward	245790	246554	0.866492	glycerol uptake facilitator	glpF	ATCACGGATT--TAACAATCTA	Not done
T06TC158	same site: T06TC158, T09TC416	Chrom	246460	Forward	BB0240	Forward	245790	246554	0.876963	glycerol uptake facilitator	glpF	TTTAACAATC--TAAGTATAGT	lp21
T08TC449		Chrom	246466	Forward	BB0240	Forward	245790	246554	0.884817	glycerol uptake facilitator	glpF	AATCTAAGTA--TAGTTATTGT	lp5
T11TC210		Chrom	246470	Reverse	BB0240	Forward	245790	246554	0.891361	glycerol uptake facilitator	glpF	TAAGTATAGT--TATTGTACCA		lp28-1
T11TC263		Chrom	246596	Reverse	BB0241	Forward	246597	248102	0	glycerol kinase	glpK	AAGGAAAAAC--TATGAAATAC	Complete
T06TC395		Chrom	246610	Forward	BB0241	Forward	246597	248102	0.00863787	glycerol kinase	glpK	AAATACATTT--TATCTATTGA	Not done
T08TC443		Chrom	246892	Reverse	BB0241	Forward	246597	248102	0.196678	glycerol kinase	glpK	TACAATGCAA--TAGTATGGCA	Complete
T09TC455		Chrom	247033	Forward	BB0241	Forward	246597	248102	0.289701	glycerol kinase	glpK	TTGGATAATG--TAGAAGGTGC	lp5
T09TC353		Chrom	247662	Forward	BB0241	Forward	246597	248102	0.707641	glycerol kinase	glpK	CTGGGATTCT--TATGCAAGAG	Complete
T06TC285		Chrom	247987	Forward	BB0241	Forward	246597	248102	0.923588	glycerol kinase	glpK	CTTTGGCAAG--TAGACAAGAT	lp5
T10TC402		Chrom	248140	Forward	IR BB0241-BB0242	0	248103	248155	0.711538	Intergenic Region	0	AACAAAAATA--TACTGGTAAC	lp5
T11TC163		Chrom	248196	Reverse	BB0242	Forward	248156	248434	0.147482	conserved hypothetical protein		AAACAACATA--TAATAAAAAT	lp5
T08TC663		Chrom	248262	Reverse	BB0242	Forward	248156	248434	0.384892	conserved hypothetical protein		TTTTTTCATC--TACATCTATT	Complete
T08TC547	same site: T08TC547, T09TC464	Chrom	248356	Reverse	BB0242	Forward	248156	248434	0.723022	conserved hypothetical protein		AAATGATTAA--TAATATATTA	lp5
T09TC415		Chrom	248417	Forward	BB0242	Forward	248156	248434	0.938849	conserved hypothetical protein		GCAATTGGTC--TATAGTGCTA		lp5
T03P01A04	T03P01A04, T03P01A05, T03P01A08, T03P01A10	Chrom	248474	Reverse	IR BB0242-BB0243	0	248435	248505	0.571429	Intergenic Region	0	TTCAATCTAG--TATTTAACTA	cp32-6,lp5
T09TC430		Chrom	248839	Forward	BB0243	Forward	248506	250089	0.21036	glycerol-3-phosphate dehydrogenase, anaerobic	glpA	CACGCCTATT--TATAATGTTT	lp5
T11TC141		Chrom	248863	Reverse	BB0243	Forward	248506	250089	0.226153	glycerol-3-phosphate dehydrogenase, anaerobic	glpA	AATACCTTAT--TATTATTTTG	Complete
T11TC511		Chrom	248973	Reverse	BB0243	Forward	248506	250089	0.295641	glycerol-3-phosphate dehydrogenase, anaerobic	glpA	CTCCCAATAT--TAAAACAGAG	Not done
T10TC465		Chrom	249002	Forward	BB0243	Forward	248506	250089	0.313329	glycerol-3-phosphate dehydrogenase, anaerobic	glpA	TGCTCTGTTC--TATATTACGA	Complete
T08TC285		Chrom	249084	Forward	BB0243	Forward	248506	250089	0.36513	glycerol-3-phosphate dehydrogenase, anaerobic	glpA	GCATTGCCCT--TAACTATACA	lp5
T08TC555	T08TC555, T08TC654	Chrom	249088	Reverse	BB0243	Forward	248506	250089	0.368288	glycerol-3-phosphate dehydrogenase, anaerobic	glpA	TGCCCTTAAC--TATACAGAAC	Complete
T11TC294	T11TC294, T11TC296	Chrom	249251	Forward	BB0243	Forward	248506	250089	0.470625	glycerol-3-phosphate dehydrogenase, anaerobic	glpA	GAAAAAGCCT--TAAACATCAT	lp28-1,lp5
T04TC219		Chrom	249605	Reverse	BB0243	Forward	248506	250089	0.694883	glycerol-3-phosphate dehydrogenase, anaerobic	glpA	AAAATATTTA--TATCAGATTC		lp5
T10TC361		Chrom	249621	Forward	BB0243	Forward	248506	250089	0.704359	glycerol-3-phosphate dehydrogenase, anaerobic	glpA	ATTCAAATCT--TATTACAATA	lp5
T11TC212		Chrom	249624	Reverse	BB0243	Forward	248506	250089	0.706886	glycerol-3-phosphate dehydrogenase, anaerobic	glpA	CAAATCTTAT--TACAATAGCG	lp5
T11TC204		Chrom	249689	Forward	BB0243	Forward	248506	250089	0.747315	glycerol-3-phosphate dehydrogenase, anaerobic	glpA	CTTAAGGCCA--TAGAACAAAA		lp28-1,lp5
T08TC689		Chrom	250672	Reverse	BB0245	Reverse	251211	250657	0.971119	hypothetical protein		TACTTTCATC--TATTTTGTTC	lp5
T06TC003		Chrom	252806	Reverse	BB0247	Forward	252434	253039	0.616529	non-canonical purine NTP pyrophosphatase, RdgB/HAM1 family		CAACATAAGC--TATATATCAA	lp28-1,lp5
T11TC517		Chrom	259038	Forward	BB0252	Forward	259000	261303	0.0165002	conserved hypothetical integral membrane protein		ATAAAGGAAT--TATATTCACA	Not done
T09TC384		Chrom	259758	Forward	BB0252	Forward	259000	261303	0.329136	conserved hypothetical integral membrane protein		TACAATCCCC--TATTACAGTG	lp21
T09TC378		Chrom	259794	Reverse	BB0252	Forward	259000	261303	0.345202	conserved hypothetical integral membrane protein		TTGTTTTACT--TATTTCAATC		lp5
T10TC140		Chrom	259820	Reverse	BB0252	Forward	259000	261303	0.356492	conserved hypothetical integral membrane protein		GCCAATGCTG--TACATATAAT	lp5
T08TC480		Chrom	259826	Reverse	BB0252	Forward	259000	261303	0.359097	conserved hypothetical integral membrane protein		GCTGTACATA--TAATAAATGA	lp5
T05TC444		Chrom	260598	Forward	BB0252	Forward	259000	261303	0.693878	conserved hypothetical integral membrane protein		CTAAGGACAA--TAAAAGAATG	cp9
T05TC510		Chrom	260637	Forward	BB0252	Forward	259000	261303	0.710812	conserved hypothetical integral membrane protein		CATTAATATC--TATCATAGTA	lp5
T06TC424		Chrom	260734	Forward	BB0252	Forward	259000	261303	0.752931	conserved hypothetical integral membrane protein		AAATAATAAA--TATCATTTCT	Not done
T05TC367		Chrom	260752	Forward	BB0252	Forward	259000	261303	0.760747	conserved hypothetical integral membrane protein		CTCAGGTGTT--TATGATAAGG		lp5
T04TC382		Chrom	260772	Reverse	BB0252	Forward	259000	261303	0.769865	conserved hypothetical integral membrane protein		TATTAATAGC--TAAAACAATG	Complete
T03TC216		Chrom	261083	Forward	BB0252	Forward	259000	261303	0.904472	conserved hypothetical integral membrane protein		ATACCCAATG--TATTTAATGG	cp9,lp5
T11TC490		Chrom	261260	Forward	BB0252	Forward	259000	261303	0.981329	conserved hypothetical integral membrane protein		AAACCTAGAG--TAAAGCTAGC	Not done
T11TC160		Chrom	261266	Reverse	BB0252	Forward	259000	261303	0.984368	conserved hypothetical integral membrane protein		AGAGTAAAGC--TAGCCTCAAA	lp5	lp28-1
T05TC512		Chrom	264054	Forward	BB0254	Forward	263988	266114	0.0310442	single-stranded-DNA-specific exonuclease	recJ	TGCTAAGCAA--TATAATATCA	lp21
T07TC387		Chrom	264274	Forward	BB0254	Forward	263988	266114	0.134525	single-stranded-DNA-specific exonuclease	recJ	GCAACAATAA--TAATGTACGA	Complete
T07TC022		Chrom	265453	Forward	BB0254	Forward	263988	266114	0.689087	single-stranded-DNA-specific exonuclease	recJ	TATGATAACA--ATACTCCAAA	Not done		anomolous tranposition event
T05TC051		Chrom	265655	Forward	BB0254	Forward	263988	266114	0.784102	single-stranded-DNA-specific exonuclease	recJ	CAGCTGGATT--TACGCTGCAT	lp28-1	lp5
T07TC129		Chrom	265756	Forward	BB0254	Forward	263988	266114	0.831609	single-stranded-DNA-specific exonuclease	recJ	TCAATACCAA--TAGATGCTAT	cp9,lp5
T05TC167		Chrom	266110	Forward	BB0255	Forward	266095	267051	0.0156904	M23 peptidase domain protein		CAAATCAATG--TATAGAATAC	lp5
T05TC597		Chrom	266184	Reverse	BB0255	Forward	266095	267051	0.0941423	M23 peptidase domain protein		TAATAAATAC--TATTCCTAAA	cp9,lp21,lp5
T09TC367		Chrom	266627	Reverse	BB0255	Forward	266095	267051	0.557531	M23 peptidase domain protein		CAATACATTG--TAACAAGCCT		lp5
T11TC311		Chrom	267273	Forward	BB0256	Forward	267066	267275	0.990431	ribosomal protein S21	rpsU	AACTAATAGA--TAGATCGCAC	lp5
T11P01B12	T11P01B12, T11P01F02, T11P01G12; same site: T06TC150, T08P01B06	Chrom	273891	Forward	BB0261	Forward	273854	275236	0.0267728	tetratricopeptide repeat domain protein		TCATTGACAG--TATTTATTTT	Not done
T05TC026		Chrom	274650	Reverse	BB0261	Forward	273854	275236	0.5767	tetratricopeptide repeat domain protein		AAAGAAATAA--TAAAAGTAAA		lp5
T11TC067		Chrom	275620	Forward	BB0262	Reverse	276496	275243	0.699122	M23 peptidase domain protein		ACAGGATAAA--TAAAAGTCTC	Complete
T11TC243		Chrom	276514	Forward	IR BB0262-BB0263	0	276497	276557	0.283333	Intergenic Region	0	TATTTCATTA--TACAATAGAA	lp5
T10TC090		Chrom	276901	Reverse	BB0263	Forward	276558	277064	0.679842	signal peptidase I	lepB-3	ATACATGATT--TAAACTTTAA		lp5
T06TC349		Chrom	277775	Forward	BB0264	Reverse	278565	277090	0.535593	heat shock protein 70	dnaK-1	TTTAAGATTA--TAATTCAAAT	lp5
T06TC583		Chrom	278130	Reverse	BB0264	Reverse	278565	277090	0.294237	heat shock protein 70	dnaK-1	GTTGGTTCAT--TAAGTATGGC	Not done
T05TC397		Chrom	278204	Forward	BB0264	Reverse	278565	277090	0.244746	heat shock protein 70	dnaK-1	CTCAGAAAAA--TAGGCAGGGA	Complete
T11TC234		Chrom	278479	Forward	BB0264	Reverse	278565	277090	0.0583051	heat shock protein 70	dnaK-1	CCCTTTCATT--TAATATTATC	Complete
T06TC353		Chrom	278545	Forward	BB0265	Reverse	279058	278537	0.984645	conserved hypothetical protein		GATCAATACC--TATCCATTTT	cp9
T10TC210		Chrom	278603	Reverse	BB0265	Reverse	279058	278537	0.871401	conserved hypothetical protein		CAACCTCACC--TAAATCTAAC	lp38
T09TC515		Chrom	278644	Forward	BB0265	Reverse	279058	278537	0.794626	conserved hypothetical protein		TCAAAAGACA--TACCTTGTTC	Complete
T04TC289		Chrom	278683	Forward	BB0265	Reverse	279058	278537	0.71977	conserved hypothetical protein		TTGCGAACAT--TATAACTTTC	cp32-6,cp9,lp5
T10TC533		Chrom	279052	Forward	BB0265	Reverse	279058	278537	0.0115163	conserved hypothetical protein		TAAAAAACAA--TAAACATATA	Complete
T05TC031		Chrom	279140	Reverse	BB0266	Reverse	279386	279078	0.795455	conserved hypothetical protein		GGATATAAAC--TAAGCATCAC	Not done
T03TC091		Chrom	279380	Forward	BB0266	Reverse	279386	279078	0.0194805	conserved hypothetical protein		AATGTATCCA--TATACAAATC	lp5
T06TC470		Chrom	279478	Reverse	BB0267	Reverse	281311	279407	0.962185	conserved hypothetical protein		GTAACGTTGT--TATAATCTTT	Not done
T09TC371		Chrom	279511	Reverse	BB0267	Reverse	281311	279407	0.944853	conserved hypothetical protein		AAAGCATTCT--TAATATAAAG	cp32-6,lp21
T07TC278		Chrom	280264	Forward	BB0267	Reverse	281311	279407	0.549895	conserved hypothetical protein		ACTAAATAAA--TATTATGAAC	lp5	cp9
T10P01E03	T10P01E03, T10P01F05	Chrom	280280	Forward	BB0267	Reverse	281311	279407	0.541492	conserved hypothetical protein		GAACAGATAT--TACACCATCT	Not done
T11TC147		Chrom	280599	Reverse	BB0267	Reverse	281311	279407	0.373424	conserved hypothetical protein		AGGCTCGCCA--TAAACAGGAT	lp5
T11TC174		Chrom	281469	Reverse	BB0268	Reverse	281793	281314	0.674322	conserved hypothetical protein		AAATCACCAC--TACTACTGAT	lp28-1,lp5
T09TC041		Chrom	289112	Forward	BB0276	Reverse	289583	288957	0.752396	flagellar biosynthesis protein	fliZ	GCAGAATCAT--TAATTTTGCT		lp5
T04TC041		Chrom	297188	Forward	BB0287	Reverse	297469	297038	0.651972	flagellar protein	flbA	TATATTTATC--TACATAAACA	Complete
T06TC447		Chrom	297211	Reverse	BB0287	Reverse	297469	297038	0.596288	flagellar protein	flbA	TAACATTTGT--TATAATGCTT	Not done
T10TC091		Chrom	297745	Forward	BB0288	Reverse	298776	297466	0.787023	flagellum-specific ATP synthase	fliI	TTGAAGGATA--TATTCCCCTG	lp28-2,lp5
T05TC243		Chrom	299448	Reverse	BB0289	Reverse	299715	298795	0.28913	flagellar assembly protein	fliH	GCCTTTGCCT--TAGCTTCTTC	lp5
T05TC319		Chrom	303740	Forward	BB0294	Reverse	303740	303333	0	flagellar basal-body rod protein	flgB	AAATCATTCA--(TATG)GAAACC	cp9,lp5		possible genome sequence error (AATT-->TATG)
T07TC058		Chrom	303827	Forward	BB0295	Reverse	305141	303774	0.961229	heat shock protein HslVU, ATPase subunit HslU	hslU	ATTTTTTTAT--TAACATAGTC	lp5
T04TC283		Chrom	303832	Reverse	BB0295	Reverse	305141	303774	0.95684	heat shock protein HslVU, ATPase subunit HslU	hslU	TTTATTAACA--TAGTCCAAGT	Complete
T06TC546		Chrom	303900	Forward	BB0295	Reverse	305141	303774	0.907827	heat shock protein HslVU, ATPase subunit HslU	hslU	CTGCAAGCAC--TATTTCCATA	Not done
T03TC241		Chrom	304039	Reverse	BB0295	Reverse	305141	303774	0.805413	heat shock protein HslVU, ATPase subunit HslU	hslU	CATCGCAACA--TATTGTTTTA	lp5
T05TC246		Chrom	304149	Reverse	BB0295	Reverse	305141	303774	0.724945	heat shock protein HslVU, ATPase subunit HslU	hslU	GCTCGGGTAT--TAAATCAGAA	lp5
T09TC066		Chrom	304713	Forward	BB0295	Reverse	305141	303774	0.313094	heat shock protein HslVU, ATPase subunit HslU	hslU	GACTATCAAC--TATTCTCTCC	lp5
T03TC273		Chrom	304759	Reverse	BB0295	Reverse	305141	303774	0.278713	heat shock protein HslVU, ATPase subunit HslU	hslU	TACAGTACTA--TACATCTCTT	cp32-6,lp5
T05TC056		Chrom	305052	Reverse	BB0295	Reverse	305141	303774	0.0643745	heat shock protein HslVU, ATPase subunit HslU	hslU	CGTCTTGACC--TATTATATAT	lp5
T08TC279		Chrom	305154	Reverse	BB0296	Reverse	305661	305113	0.923358	ATP-dependent protease HslV	hslV	TTAGAATTAG--TATATATACA		lp5
T03TC016		Chrom	305158	Forward	BB0296	Reverse	305661	305113	0.917883	ATP-dependent protease HslV	hslV	AATTAGTATA--TATACACACT	cp32-3,cp9,lp5
T09TC058		Chrom	305331	Reverse	BB0296	Reverse	305661	305113	0.600365	ATP-dependent protease HslV	hslV	ATCAAAAGAA--TATTGTTAGA	cp9
T06TC027		Chrom	305484	Reverse	BB0296	Reverse	305661	305113	0.321168	ATP-dependent protease HslV	hslV	TCAAAAAGAG--TAATTGCATC	lp28-1,lp5
T11TC368		Chrom	305882	Forward	BB0297	Reverse	306618	305671	0.777191	smg protein		ATCATAAACA--TAAACATCAA	Not done
T06TC062		Chrom	305948	Reverse	BB0297	Reverse	306618	305671	0.706441	smg protein		CAAGGGTGCA--TATGTTATAA	lp5
T07TC214		Chrom	306154	Reverse	BB0297	Reverse	306618	305671	0.488912	smg protein		TATTCTCATT--TATTGCTGCT	lp5
T11TC358		Chrom	306375	Forward	BB0297	Reverse	306618	305671	0.2566	smg protein		TTAAGCTTAT--TAGGATAAGA	Complete
T05TC032		Chrom	306537	Forward	BB0297	Reverse	306618	305671	0.0855333	smg protein		ATAACATTAT--TAAAATCAAA	cp32-7
T04TC309	same site:T04TC309, T06TC098	Chrom	321395	Reverse	BB0315	Forward	321352	322038	0.0641399	conserved hypothetical protein		GGCTTGATAA--TAAATGTTTG	lp5
T05TC543		Chrom	321684	Forward	BB0315	Forward	321352	322038	0.483965	conserved hypothetical protein		ACTTTTTAGA--TATCTCTTGG	lp5
T07TC142	same site: T07TC142, T08TC129	Chrom	323207	Reverse	BB0317	Reverse	323779	322847	0.612661	conserved hypothetical integral membrane protein		TATTGCTTAA--TATTTCAAGC	lp28-1,lp5
T05TC132	same site: T05TC132, T07TC486	Chrom	323719	Reverse	BB0317	Reverse	323779	322847	0.0633047	conserved hypothetical integral membrane protein		AAAAAATAGC--TAATACTTAA	lp5
T05TC471		Chrom	323827	Reverse	BB0318	Reverse	325236	323776	0.964384	methylgalactoside ABC transporter, ATP-binding protein	mglA	TTTCTCTAGA--TACGTTTAAC	lp5
T10P01G10	T10P01G10, T10P01H10	Chrom	323937	Forward	BB0318	Reverse	325236	323776	0.889726	methylgalactoside ABC transporter, ATP-binding protein	mglA	TTTGAATAAT--TACGAATAGC	Not done
T05TC113		Chrom	324161	Forward	BB0318	Reverse	325236	323776	0.736301	methylgalactoside ABC transporter, ATP-binding protein	mglA	CTGATTAATG--TAAGATTGCC	lp28-1,lp28-2,lp5
T10TC044		Chrom	324814	Forward	BB0318	Reverse	325236	323776	0.289041	methylgalactoside ABC transporter, ATP-binding protein	mglA	CTTTAATATT--TAAATCTTTA	cp9,lp5
T10TC055		Chrom	325021	Forward	BB0318	Reverse	325236	323776	0.14726	methylgalactoside ABC transporter, ATP-binding protein	mglA	TAGCTTTATC--TACATTCCAA		lp5
T04TC292		Chrom	325274	Forward	BB0319	Reverse	326288	325236	0.963878	exported protein	tpn38b	CCATTTGCAC--TAACCTCTTC	lp28-1	lp5
T07TC294		Chrom	325529	Forward	BB0319	Reverse	326288	325236	0.721483	exported protein	tpn38b	ACTGCAGAGA--TATTATTCTC	lp5	lp17
T06TC392		Chrom	325858	Forward	BB0319	Reverse	326288	325236	0.408745	exported protein	tpn38b	TGCTACATTA--TAAGAAACTG	Not done
T06TC369		Chrom	325930	Forward	BB0319	Reverse	326288	325236	0.340304	exported protein	tpn38b	AGTATAAGGA--TAATTACTTG	lp5
T07TC296	T07TC296, T07TC359	Chrom	326125	Forward	BB0319	Reverse	326288	325236	0.154943	exported protein	tpn38b	CATTTCTTTA--TAAGATGGAG	lp5
T05TC100		Chrom	326310	Reverse	IR BB0319-BB0320	0	326289	326324	0.628571	Intergenic Region	0	ATCCTTTTAT--TAATTATTAT	cp32-6,cp9,lp5
T10P02E06		Chrom	326339	Reverse	BB0320	Reverse	326432	326325	0.859813	conserved hypothetical protein		TTTAATGCCA--TAAAAGTTAA	cp32-1, lp28-1, lp5	lp17
T07TC019		Chrom	327328	Forward	BB0322	Reverse	327757	326699	0.405482	conserved hypothetical protein		TGTCTGATGC--TACCCTTGTA	Complete
T09TC208		Chrom	327694	Reverse	BB0322	Reverse	327757	326699	0.0586011	conserved hypothetical protein		CTAACAACAC--TAACTCTACC	lp5
T06P01B08	same site: T06P01B08, T09TC462	Chrom	327716	Reverse	BB0322	Reverse	327757	326699	0.0378072	conserved hypothetical protein		CTATTTCTTT--TACAACTGCC	Not done
T07TC501		Chrom	329412	Forward	BB0324	Forward	329262	329621	0.417827	conserved hypothetical protein		TTTAAAAGCA--TACGAAAAAA	lp5
T07TC228		Chrom	329860	Forward	BB0325	Reverse	330752	329643	0.804328	conserved hypothetical protein		AACATTAACA--TACTTAAGAA	Complete
T08TC011		Chrom	330336	Forward	BB0325	Reverse	330752	329643	0.375113	conserved hypothetical protein		TTAATACTTC--TAAGTCAATA	lp38
T07TC188	primer 5275	Chrom	330404	Forward	BB0325	Reverse	330752	329643	0.313796	conserved hypothetical protein		GGAATCAATA--TATGAAAAGC	Complete
T08TC090		Chrom	334827	Reverse	IR BB0327-BB0328	0	334516	334918	0.778055	Intergenic Region	0	ACTGGAGGCA--TACATATTTA	Complete		Revised 3' end to match GenBank NC_001318.1 (110513)
T11TC050		Chrom	335198	Forward	BB0328	Forward	334919	336508	0.176322	oligopeptide ABC transporter, periplasmic binding protein	oppA-1	TGGAATTATT--TACACATTTA	cp9		Revised 5' end to match GenBank NC_001318.1 (110513)
T03TC095		Chrom	335334	Reverse	BB0328	Forward	334919	336508	0.261965	oligopeptide ABC transporter, periplasmic binding protein	oppA-1	AAATCTACAA--TAAAAAATGC	Complete		Revised 5' end to match GenBank NC_001318.1 (110513)
T08P01C07	T08P01C07, T08P01E03, T08P02H02	Chrom	335491	Forward	BB0328	Forward	334919	336508	0.360831	oligopeptide ABC transporter, periplasmic binding protein	oppA-1	TTCCAATGCA--TATTGTTGAA	Not done		Revised 5' end to match GenBank NC_001318.1 (110513)
T06TC172		Chrom	335793	Forward	BB0328	Forward	334919	336508	0.551008	oligopeptide ABC transporter, periplasmic binding protein	oppA-1	ATGGCATACA--TAGCATTCAA	Complete		Revised 5' end to match GenBank NC_001318.1 (110513)
T08TC111		Chrom	335878	Forward	BB0328	Forward	334919	336508	0.604534	oligopeptide ABC transporter, periplasmic binding protein	oppA-1	AAACTTTAAC--TAAAGTAGTT		lp5	Revised 5' end to match GenBank NC_001318.1 (110513)
T05TC102		Chrom	335961	Reverse	BB0328	Forward	334919	336508	0.656801	oligopeptide ABC transporter, periplasmic binding protein	oppA-1	AAAAATTTAA--TACTATTTGA	lp5		Revised 5' end to match GenBank NC_001318.1 (110513)
T04TC011		Chrom	336241	Reverse	BB0328	Forward	334919	336508	0.833123	oligopeptide ABC transporter, periplasmic binding protein	oppA-1	ACAGCTTATT--TACAACAGAA	cp9		Revised 5' end to match GenBank NC_001318.1 (110513)
T06TC543		Chrom	336406	Forward	BB0328	Forward	334919	336508	0.937028	oligopeptide ABC transporter, periplasmic binding protein	oppA-1	CACCTTTATA--TATACCCAAA	Not done		Revised 5' end to match GenBank NC_001318.1 (110513)
T08TC622		Chrom	336463	Forward	BB0328	Forward	334919	336508	0.972922	oligopeptide ABC transporter, periplasmic binding protein	oppA-1	GGGTACCAAA--TATCGCAGAA	Complete		Revised 5' end to match GenBank NC_001318.1 (110513)
T05TC551		Chrom	336493	Forward	BB0328	Forward	334919	336508	0.991814	oligopeptide ABC transporter, periplasmic binding protein	oppA-1	ATGAAGATAT--TAAAACTAAA	cp9,lp5		Revised 5' end to match GenBank NC_001318.1 (110513)
T11P01B06	T11P01B06, T11P02A07, T11P02C02, T11P02C09, T11P01H03, T11P01H11	Chrom	336524	Reverse	IR BB0328-BB0329	0	336509	336628	0.134454	Intergenic Region	0	TTAAGTAAAA--TAAGTAATTT	cp32-6
T06TC269		Chrom	337152	Reverse	BB0329	Forward	336629	338215	0.330391	oligopeptide ABC transporter, periplasmic binding protein	oppA-2	ATTGATATGT--TAGTACACCA	lp21
T07TC487		Chrom	337398	Forward	BB0329	Forward	336629	338215	0.484868	oligopeptide ABC transporter, periplasmic binding protein	oppA-2	AATGAAGAGC--TAGATGCAAT	cp9,lp5
T11TC145		Chrom	337853	Reverse	BB0329	Forward	336629	338215	0.772383	oligopeptide ABC transporter, periplasmic binding protein	oppA-2	ATGGACAACA--TACTTAAACA		cp9
T08TC301	Same site T05TC429; T08TC301, T08TC302	Chrom	337857	Forward	BB0329	Forward	336629	338215	0.774275	oligopeptide ABC transporter, periplasmic binding protein	oppA-2	ACAACATACT--TAAACACTAA		cp9
T06TC569		Chrom	338108	Reverse	BB0329	Forward	336629	338215	0.933165	oligopeptide ABC transporter, periplasmic binding protein	oppA-2	AGCACCAATA--TACATATATG	Not done
T06TC265		Chrom	338112	Forward	BB0329	Forward	336629	338215	0.935057	oligopeptide ABC transporter, periplasmic binding protein	oppA-2	CCAATATACA--TATATGGGAA	lp5
T09TC114		Chrom	338756	Forward	BB0330	Forward	338358	339983	0.244923	oligopeptide ABC transporter, periplasmic binding protein	oppA-3	AAACAGGATC--TACAAATGTT	Complete
T11TC181		Chrom	340259	Forward	IR BB0331-BB0332	0	340218	340340	0.336066	Intergenic Region	0	AATTATCAAC--TATAGCTTGA	cp9,lp5	lp28-1
T04TC097		Chrom	344356	Forward	BB0336	Reverse	344947	344192	0.782781	P26		AGCTTAATAG--TATAAATTCC	Complete
T07TC143		Chrom	344803	Forward	BB0336	Reverse	344947	344192	0.190728	P26		GAATCAACCA--TAGGCTCAAG	cp32-7,lp28-1,lp5
T11TC297		Chrom	344924	Reverse	BB0336	Reverse	344947	344192	0.0291391	P26		CAAAAACCAA--TAAATACAAA	Not done
T04TC298		Chrom	344947	Forward	BB0336	Reverse	344947	344192	0	P26		CTTTCTTTCA--TAGATTATAC		lp5
T07TC179		Chrom	351478	Reverse	BB0344	Reverse	353440	351341	0.934254	DNA helicase	uvrD	TTATAAATTA--TATAATCTCC	lp21
T07TC421		Chrom	351622	Reverse	BB0344	Reverse	353440	351341	0.86565	DNA helicase	uvrD	AAAGTGCCCT--TATAAGAACC	lp5
T10TC209		Chrom	353286	Forward	BB0344	Reverse	353440	351341	0.0733683	DNA helicase	uvrD	TATATTCATA--TATTTGATTA	Complete
T09TC171		Chrom	355452	Forward	IR BB0346-BB0347	0	355299	355481	0.840659	Intergenic Region	0	ATTTAAAGCT--TAGATATAAA	lp5
T05TC626		Chrom	355858	Reverse	BB0347	Forward	355482	356909	0.264191	fibronectin/fibrinogen-binding protein, putative		TCGCCCAATA--TAATAGCTAC	lp38,cp9
T03TC026		Chrom	355865	Reverse	BB0347	Forward	355482	356909	0.269096	fibronectin/fibrinogen-binding protein, putative		ATATAATAGC--TACAAATTCA	lp5
T06TC534		Chrom	356010	Reverse	BB0347	Forward	355482	356909	0.370708	fibronectin/fibrinogen-binding protein, putative		AAAGGAAGAA--TATAATAATA	Not done
T05TC568		Chrom	356174	Forward	BB0347	Forward	355482	356909	0.484933	fibronectin/fibrinogen-binding protein, putative		AACAACAAAT--TAAACTGCTT	Complete
T08TC094		Chrom	356357	Reverse	BB0347	Forward	355482	356909	0.613875	fibronectin/fibrinogen-binding protein, putative		TTAAAGCATA--TAAAAAGGGC	cp32-7	lp28-3,lp38,lp5
T03TC130		Chrom	356639	Forward	BB0347	Forward	355482	356909	0.810792	fibronectin/fibrinogen-binding protein, putative		ATTGGCTTCA--TACAAGAGAT	lp5
T05TC017		Chrom	360982	Forward	BB0351	Reverse	361081	359513	0.0631378	conserved hypothetical protein		AAACTAACTT--TAACTTCTTT	lp38
T05TC030		Chrom	361141	Reverse	IR BB0351-BB0352	0	361082	361187	0.571429	Intergenic Region	0	GAAATTAATA--TAACTATAAA	Not done
T03TC295		Chrom	362288	Reverse	BB0352	Forward	361188	362321	0.971756	conserved hypothetical protein		GGTTTTTCTC--TAAAGCTAAT	lp21
T11TC272		Chrom	366717	Reverse	BB0358	Reverse	366960	366229	0.331053	RNA methyltransferase, RsmE family		AAACTAGAAA--TAAAAATACT	Complete
T06TC006		Chrom	366965	Forward	BB0359	Reverse	368391	366964	0.999299	carboxyl-terminal protease	ctp	CTTCACAATT--TAATTACCTA	lp28-1	lp5
T07TC279		Chrom	368614	Reverse	BB0360	Forward	368456	368881	0.374118	conserved hypothetical protein		TGTTAACATT--TATCTTATAC		lp17
T05TC417		Chrom	368657	Reverse	BB0360	Forward	368456	368881	0.475294	conserved hypothetical protein		TTTAACAACC--TATTACTTTA		lp28-1,lp5
T06TC013		Chrom	368736	Reverse	BB0360	Forward	368456	368881	0.661176	conserved hypothetical protein		ATATTAACAT--TATTATTATT	lp28-1
T04TC236		Chrom	368814	Forward	BB0360	Forward	368456	368881	0.842353	conserved hypothetical protein		GGAATTACAG--TAGTTTACCT	lp5	cp9
T05TC205		Chrom	368835	Reverse	BB0360	Forward	368456	368881	0.894118	conserved hypothetical protein		GTATTTAATG--TAACAATATT	lp28-2
T07TC375		Chrom	368850	Reverse	BB0360	Forward	368456	368881	0.929412	conserved hypothetical protein		ATATTAGTGC--TAATTAAAGC	Complete
T06TC468		Chrom	369013	Forward	BB0361	Forward	368885	370027	0.112084	minD-related ATP-binding protein	ylxH-2	TCGGAGCATC--TAATTTGCAC	Not done
T04TC204		Chrom	369225	Reverse	BB0361	Forward	368885	370027	0.298599	minD-related ATP-binding protein	ylxH-2	TATGATTACT--TAGTGATTGA	Complete
T05TC500		Chrom	369357	Forward	BB0361	Forward	368885	370027	0.41331	minD-related ATP-binding protein	ylxH-2	AAAAATATAA--TATTTAGATT	lp5
T04TC228	same site T04TC228, T10TC455	Chrom	369452	Forward	BB0361	Forward	368885	370027	0.496497	minD-related ATP-binding protein	ylxH-2	TCAAAGGGTT--TATATACCTA	lp5
T11TC284		Chrom	369460	Reverse	BB0361	Forward	368885	370027	0.504378	minD-related ATP-binding protein	ylxH-2	TTTATATACC--TAATTTGTTG	lp5
T09TC146		Chrom	369550	Forward	BB0361	Forward	368885	370027	0.582312	minD-related ATP-binding protein	ylxH-2	TCATGATATT--TAATATGCTC	cp9,lp5
T06TC033		Chrom	369704	Forward	BB0361	Forward	368885	370027	0.717163	minD-related ATP-binding protein	ylxH-2	CATCACTATA--TACAAACCTA	lp5
T05TC151		Chrom	371285	Forward	BB0363	Forward	371034	373046	0.124751	periplasmic protein		AAATCCATTC--TATCATAATT	lp5
T09TC153	same site T09TC153, T10TC492	Chrom	371365	Forward	BB0363	Forward	371034	373046	0.164513	periplasmic protein		ATAAGCGAAT--TAGAATATAA	lp38,lp5
T07TC057		Chrom	371558	Reverse	BB0363	Forward	371034	373046	0.260934	periplasmic protein		CCTCTGGAAA--TATAATCAAA	cp9,lp5
T08TC453	T08TC453, T08TC590; same site:T05TC053, T06TC521	Chrom	371578	Forward	BB0363	Forward	371034	373046	0.270378	periplasmic protein		GTAACCGACA--TAGATATCAG	lp5
T04TC278		Chrom	371654	Forward	BB0363	Forward	371034	373046	0.308151	periplasmic protein		AATTTAAAAA--TATATTAATA	Complete
T08TC613		Chrom	371656	Reverse	BB0363	Forward	371034	373046	0.309642	periplasmic protein		TTTAAAAATA--TATTAATAAC	lp5
T11TC255		Chrom	371798	Reverse	BB0363	Forward	371034	373046	0.380219	periplasmic protein		TAGAAAACTA--TAAATATCTA	Complete
T03TC202		Chrom	371863	Forward	BB0363	Forward	371034	373046	0.412028	periplasmic protein		GAAAAATTAC--TAGTAAACCA	cp32-6,lp28-1,lp5
T05TC411		Chrom	371879	Reverse	BB0363	Forward	371034	373046	0.420477	periplasmic protein		ACCATATGGA--TATTTACAAA	lp28-1,lp5
T10TC353		Chrom	371901	Reverse	BB0363	Forward	371034	373046	0.431412	periplasmic protein		AAAAAGCATA--TATTTACTTA		lp5
T06TC460		Chrom	372010	Reverse	BB0363	Forward	371034	373046	0.485586	periplasmic protein		AATGTCATTA--TACTCTGAAT	Not done
T08TC155		Chrom	372049	Forward	BB0363	Forward	371034	373046	0.504473	periplasmic protein		CACAACAATT--TAATAGTAAT	Complete
T10P01C06	T10P01C06, T10P01F02	Chrom	372272	Reverse	BB0363	Forward	371034	373046	0.615805	periplasmic protein		CTAATCCCAC--TATATACAAA	Not done
T08TC456		Chrom	372549	Forward	BB0363	Forward	371034	373046	0.752982	periplasmic protein		TTTAAGAGAA--TACAAAAGCT	lp5
T07TC273		Chrom	372813	Reverse	BB0363	Forward	371034	373046	0.884692	periplasmic protein		ATCACTCTCA--TATATTAAAA	lp5
T10TC349		Chrom	372832	Forward	BB0363	Forward	371034	373046	0.893638	periplasmic protein		ACACTACCAA--TAGACTTACT	lp5
T04TC398		Chrom	372960	Reverse	BB0363	Forward	371034	373046	0.957753	periplasmic protein		CGAATTTGTG--TATAATGAGG	cp32-6
T10TC324		Chrom	373005	Forward	BB0363	Forward	371034	373046	0.979622	periplasmic protein		AGAAATAGAC--TATGGGCAAG	lp5
T11TC154		Chrom	373078	Forward	IR BB0363-BB0364	0	373047	373139	0.336957	Intergenic Region	0	AAAATATACT--TATGCCTAAA		cp9
T06TC162		Chrom	373581	Reverse	BB0365	Reverse	374151	373567	0.974315	outer surface 22 kda lipoprotein (antigen IpLA7)		TTCGTTAACA--TAGGTGAAAT	cp9,lp28-1
T08TC050		Chrom	373650	Reverse	BB0365	Reverse	374151	373567	0.856164	outer surface 22 kda lipoprotein (antigen IpLA7)		GCATCTGAAT--TATTCTCATC	Complete
T10TC357		Chrom	374013	Forward	BB0365	Reverse	374151	373567	0.236301	outer surface 22 kda lipoprotein (antigen IpLA7)		TCATCTATTT--TAGAATCATC		lp5
T09TC042		Chrom	375833	Reverse	BB0367	Forward	375661	375939	0.622302	putative phosphotransferase enzyme IIb component		GACAACATAA--TAGGAACTAT	lp5
T05TC542		Chrom	376028	Reverse	BB0368	Reverse	377052	375961	0.937672	glycerol-3-phosphate dehydrogenase, NAD(P)+	gpsA	CAAAATTTTA--TATATAACGC	lp5
T07TC456		Chrom	376069	Reverse	BB0368	Reverse	377052	375961	0.900092	glycerol-3-phosphate dehydrogenase, NAD(P)+	gpsA	GATCACGATT--TAATTGTTTA	lp5
T05TC189		Chrom	376509	Reverse	BB0368	Reverse	377052	375961	0.496792	glycerol-3-phosphate dehydrogenase, NAD(P)+	gpsA	CTAAATAAAT--TAATAAACAA	Complete
T08P01E10		Chrom	385422	Forward	BB0374	Forward	384287	385426	0.996488	HD domain protein		ATAGATATTA--TATAAGACAC	lp21, lp5
T11TC310		Chrom	387434	Reverse	BB0377	Forward	387334	387807	0.213983	S-ribosylhomocysteinase	luxS	TTTACTACAA--TAGACATTAG	Not done		Revised 5' end to match GenBank NC_001318.1 (110513)
T06TC451		Chrom	387492	Reverse	BB0377	Forward	387334	387807	0.336864	S-ribosylhomocysteinase	luxS	CAGCAATACA--TACAATAGAG	Not done		Revised 5' end to match GenBank NC_001318.1 (110513)
T05P01F05		Chrom	387738	Forward	BB0377	Forward	387334	387807	0.858051	S-ribosylhomocysteinase	luxS	TTGATATGGC--TAAATATGAA	Not done		Revised 5' end to match GenBank NC_001318.1 (110513)
T04TC081		Chrom	387742	Forward	BB0377	Forward	387334	387807	0.866525	S-ribosylhomocysteinase	luxS	TATGGCTAAA--TATGAATCTT	Complete		Revised 5' end to match GenBank NC_001318.1 (110513)
T08P01F05		Chrom	388122	Forward	BB0378	Reverse	388480	387818	0.540785	conserved hypothetical protein		TAAAAAGAAA--TAATTACCAT	Not done
T03TC329		Chrom	388214	Reverse	BB0378	Reverse	388480	387818	0.400302	conserved hypothetical protein		CCAACATAAA--TATAATCTCA	lp5
T06TC469		Chrom	388230	Reverse	BB0378	Reverse	388480	387818	0.376133	conserved hypothetical protein		CTCATTGGTA--TAAGGAGTAT	Not done
T11TC407		Chrom	388329	Reverse	BB0378	Reverse	388480	387818	0.226586	conserved hypothetical protein		GAAAAATTGA--TACTTAAGTC	Not done
T05TC195		Chrom	391871	Forward	IR BB0381-BB0382	0	391820	391931	0.459459	Intergenic Region	0	TATAACACAA--TAAATATAAC	cp9,lp21
T04TC314		Chrom	394233	Reverse	BB0384	Reverse	395166	394105	0.878417	basic membrane protein C	bmpC	TCGGGATCCT--TAACAATTTC	lp5
T09TC084		Chrom	394382	Forward	BB0384	Reverse	395166	394105	0.738926	basic membrane protein C	bmpC	AGGCGCAATA--TATGATTGAT	cp9,lp28-1,lp5
T10TC149		Chrom	394786	Reverse	BB0384	Reverse	395166	394105	0.35721	basic membrane protein C	bmpC	CAAAAGCATC--TATAATACCA		lp5
T09TC375		Chrom	394998	Reverse	BB0384	Reverse	395166	394105	0.157399	basic membrane protein C	bmpC	AAATTATCCC--TAAGTTTTAC	Complete
T03TC215		Chrom	410661	Forward	IR BB0398-BB0399	0	410448	410786	0.630178	Intergenic Region	0	AACTGACAAT--TATGACCACA	Complete
T07TC244		Chrom	411697	Forward	BB0400	Reverse	413006	411456	0.844516	conserved hypothetical protein		ATAATAATCG--TAATATTGGC		lp5
T08TC127		Chrom	412038	Reverse	BB0400	Reverse	413006	411456	0.623871	conserved hypothetical protein		GGTTAGCAAC--TACATTATTT		lp5
T05TC549		Chrom	412682	Reverse	BB0400	Reverse	413006	411456	0.208387	conserved hypothetical protein		GCGGCAAATC--TAAATAAAAT	cp9,lp28-1,lp5
T05TC019		Chrom	416912	Reverse	BB0404	Forward	416689	417105	0.538462	conserved hypothetical protein		AGTAGTATAA--TAATAGCTGT	Complete
T03TC192		Chrom	417533	Forward	BB0405	Forward	417102	417713	0.705401	conserved hypothetical protein		CTCTTCAAAA--TAGAATAGGG	lp28-2,lp5
T05TC147		Chrom	417565	Forward	BB0405	Forward	417102	417713	0.757774	conserved hypothetical protein		TTGCCTTTGG--TAATAGAGTA	lp21
T06TC526		Chrom	417668	Forward	BB0405	Forward	417102	417713	0.92635	conserved hypothetical protein		TTGAAGGAGC--TAGATTTAAT	Not done
T06TC236		Chrom	417880	Reverse	BB0406	Forward	417724	418335	0.256956	conserved hypothetical protein		AAAGAAAAAT--TATGACTTAT	cp9
T06TC360		Chrom	418057	Reverse	BB0406	Forward	417724	418335	0.546645	conserved hypothetical protein		AATTGGACAA--TATATGAAAA	lp5
T07TC463		Chrom	420447	Reverse	BB0408	Reverse	421380	419503	0.496537	PTS system, fructose-specific IIABC component	fruA-1	AAAGCAATGC--TAAGAGCAAT	Complete
T11TC520		Chrom	420789	Forward	BB0408	Reverse	421380	419503	0.314864	PTS system, fructose-specific IIABC component	fruA-1	GTTTCTACTC--TAATGCTATA	Not done
T04TC410		Chrom	420810	Forward	BB0408	Reverse	421380	419503	0.303676	PTS system, fructose-specific IIABC component	fruA-1	CCCTGCTTTT--TAGCTTCATT	lp5	lp38
T09TC273		Chrom	421017	Reverse	BB0408	Reverse	421380	419503	0.192861	PTS system, fructose-specific IIABC component	fruA-1	TCAAATAGTT--TAGCTATAAA	cp9,lp5
T07TC473		Chrom	421164	Forward	BB0408	Reverse	421380	419503	0.115077	PTS system, fructose-specific IIABC component	fruA-1	AAACTAGTCT--TAACAACATC	lp5
T08P01G11		Chrom	421348	Forward	BB0408	Reverse	421380	419503	0.0170485	PTS system, fructose-specific IIABC component	fruA-1	GCAAAACAAA--TACAAGATCT	lp21,lp5
T07TC503		Chrom	421407	Reverse	IR BB0408-BB0409	0	421381	421553	0.156977	Intergenic Region	0	TAATTAAACA--TATTGTATAA	Complete
T10TC490		Chrom	422481	Reverse	BB0411	Forward	422471	423058	0.0187394	DNA/RNA non-specific endonuclease	nucA	ATGGTAGAAC--TAGCATTAAC	Complete
T09TC436		Chrom	422727	Reverse	BB0411	Forward	422471	423058	0.437819	DNA/RNA non-specific endonuclease	nucA	CTTGAAAAAT--TAGTAAGAGA	Complete
T05TC193		Chrom	422756	Reverse	BB0411	Forward	422471	423058	0.487223	DNA/RNA non-specific endonuclease	nucA	CTCAAAAGGA--TATATATATA	cp9,lp28-1
T04TC174	same site T04TC174, T08TC472	Chrom	422758	Reverse	BB0411	Forward	422471	423058	0.49063	DNA/RNA non-specific endonuclease	nucA	CAAAAGGATA--TATATATATT	cp9,lp5
T05TC345		Chrom	422759	Forward	BB0411	Forward	422471	423058	0.49063	DNA/RNA non-specific endonuclease	nucA	AAAAGGATAT--ATATATATTA	lp5		anomolous transposition event
T08P01E06	T08P01E06, T08P01F11	Chrom	422847	Reverse	BB0411	Forward	422471	423058	0.642249	DNA/RNA non-specific endonuclease	nucA	TTTTATAAAA--TAGTACTGGC	Not done
T04TC186		Chrom	422883	Forward	BB0411	Forward	422471	423058	0.701874	DNA/RNA non-specific endonuclease	nucA	TATTATGACA--TAATCTCTTT	lp5
T09TC334		Chrom	422893	Forward	BB0411	Forward	422471	423058	0.71891	DNA/RNA non-specific endonuclease	nucA	TAATCTCTTT--TATTATCCCA	lp5
T05TC547		Chrom	423471	Reverse	BB0412	Forward	423055	423834	0.535302	membrane protein, putative		TCAGTTTATA--TATATGCGAT	lp28-1
T06TC510		Chrom	423473	Reverse	BB0412	Forward	423055	423834	0.537869	membrane protein, putative		AGTTTATATA--TATGCGATTT	Not done
T03TC010	T03TC010, T03TC084	Chrom	423540	Reverse	BB0412	Forward	423055	423834	0.623877	membrane protein, putative		CCTGCATATA--TAGTTACACA	Complete
T11TC256		Chrom	423544	Forward	BB0412	Forward	423055	423834	0.627728	membrane protein, putative		CATATATAGT--TACACAATGC	lp5
T07TC257		Chrom	423555	Reverse	BB0412	Forward	423055	423834	0.643132	membrane protein, putative		ACACAATGCC--TATTAATTCG		lp5
T05TC588	same site:T07TC500, T05TC588	Chrom	423620	Forward	BB0412	Forward	423055	423834	0.725289	membrane protein, putative		AAATTTTACA--TAGATGCATT	lp5
T08TC344		Chrom	424152	Reverse	BB0413	Reverse	424445	423822	0.4687	conserved hypothetical integral membrane protein		ATGATATCAA--TATACCTAAA	cp9,lp28-2
T06TC295		Chrom	424556	Forward	IR BB0413-BB0414	0	424446	424693	0.445344	Intergenic Region	0	AAAACCTTTT--TATAAACCTA	Complete
T08TC168		Chrom	425011	Forward	BB0414	Forward	424694	425551	0.369895	chemotaxis protein methyltransferase	cheR-2	AAAATAGGAT--TATCATCTGG	cp9
T11TC527		Chrom	425058	Forward	BB0414	Forward	424694	425551	0.424737	chemotaxis protein methyltransferase	cheR-2	CCTTATTCAT--TAGCATTTGT	lp5
T11TC418		Chrom	425094	Forward	BB0414	Forward	424694	425551	0.470245	chemotaxis protein methyltransferase	cheR-2	CCAAAAGAAA--TA(G)ATTTTGTT	Not done		possible genome sequence error (G at 425096)
T08TC139		Chrom	425339	Reverse	BB0414	Forward	424694	425551	0.753792	chemotaxis protein methyltransferase	cheR-2	TGTTTTAATA--TACTTTGATG		lp5
T05TC332		Chrom	425807	Reverse	BB0415	Forward	425584	426711	0.198758	protein-glutamate methylesterase	cheB-1	AAAAACAGTT--TAAACAAAAC		lp5
T04TC055		Chrom	425819	Reverse	BB0415	Forward	425584	426711	0.209406	protein-glutamate methylesterase	cheB-1	AACAAAACAA--TACCAATTGT	lp5
T05TC550		Chrom	425889	Reverse	BB0415	Forward	425584	426711	0.271517	protein-glutamate methylesterase	cheB-1	CCGATGATCT--TATATTAGTA	Complete
T08TC619		Chrom	426246	Reverse	BB0415	Forward	425584	426711	0.588287	protein-glutamate methylesterase	cheB-1	TTGTTCAACA--TATGCCTAAA	Complete
T06TC106		Chrom	426261	Forward	BB0415	Forward	425584	426711	0.60071	protein-glutamate methylesterase	cheB-1	CTAAAGGATT--TACAGAAGAA	lp5
T08TC614		Chrom	426352	Forward	BB0415	Forward	425584	426711	0.681455	protein-glutamate methylesterase	cheB-1	AGGATATGCA--TACATTAGCT		lp5
T04TC378		Chrom	426474	Reverse	BB0415	Forward	425584	426711	0.790594	protein-glutamate methylesterase	cheB-1	TATTTCAATC--TATTGCAGAG	lp21
T10TC237		Chrom	426645	Forward	BB0415	Forward	425584	426711	0.941437	protein-glutamate methylesterase	cheB-1	AGGAAAACAA--TATAGACTAT	Complete
T06TC001		Chrom	429055	Forward	BB0418	Forward	428646	429674	0.39786	conserved hypothetical protein		TTTTTAAATT--TATATGCATC	Complete
T11TC190		Chrom	429494	Reverse	BB0418	Forward	428646	429674	0.825875	conserved hypothetical protein		ACAACATTTC--TATTGTTGCT	lp5	lp28-1
T09TC402		Chrom	429701	Reverse	BB0419	Reverse	430616	429693	0.990249	response regulatory protein-1	rrp-1	ATTTAATATC--TAAACTGATT	cp32-6	lp5
T11TC306		Chrom	430361	Reverse	BB0419	Reverse	430616	429693	0.27519	response regulatory protein-1	rrp-1	GGAATCTCTT--TAGTATCGGG	Not done
T10TC452		Chrom	430422	Forward	BB0419	Reverse	430616	429693	0.210184	response regulatory protein-1	rrp-1	CTGGAAGACC--TATGTCAAGA	lp5
T05TC185		Chrom	430520	Forward	BB0419	Reverse	430616	429693	0.104009	response regulatory protein-1	rrp-1	CCTTGCAATA--TATTTACCAA	Complete
T08TC534		Chrom	430524	Reverse	BB0419	Reverse	430616	429693	0.0985915	response regulatory protein	rrp-1	GCAATATATT--TACCAATAAA	lp5
T09TC391		Chrom	430623	Reverse	BB0420	Reverse	435103	430619	0.998885	sensory transduction histidine kinase/response regulator-1	hk1	CCACTGCTAA--TATCTCTTAT	cp32-6,lp21	lp5
T10TC488		Chrom	430630	Reverse	BB0420	Reverse	435103	430619	0.997324	sensory transduction histidine kinase/response regulator-1	hk1	TAATATCTCT--TATTATTAAG	Complete
T10TC395		Chrom	430916	Forward	BB0420	Reverse	435103	430619	0.933764	sensory transduction histidine kinase/response regulator-1	hk1	TGTCGCTTAT--TAGTTGAAAT		lp5
T05TC427		Chrom	431110	Reverse	BB0420	Reverse	435103	430619	0.890277	sensory transduction histidine kinase/response regulator-1	hk1	AAATCAATAA--TATTAATAGA	lp21
T07TC469	same site: T07TC469, T08TC109, T11TC189	Chrom	431159	Forward	BB0420	Reverse	435103	430619	0.879572	sensory transduction histidine kinase/response regulator-1	hk1	CAGAATATGA--TACATATGAA	lp5
T05TC410		Chrom	431165	Reverse	BB0420	Reverse	435103	430619	0.878011	sensory transduction histidine kinase/response regulator-1	hk1	ATGATACATA--TGAAAGATTT	cp9,lp28-1,lp5		anomolous transposition event
T10TC502		Chrom	431174	Forward	BB0420	Reverse	435103	430619	0.876227	sensory transduction histidine kinase/response regulator-1	hk1	ATGAAAGATT--TAATTCTTTT		lp5
T06TC381		Chrom	431279	Forward	BB0420	Reverse	435103	430619	0.85281	sensory transduction histidine kinase/response regulator-1	hk1	AGTATTTTTT--TAATATAGTT	Not done
T10TC476		Chrom	431306	Forward	BB0420	Reverse	435103	430619	0.846789	sensory transduction histidine kinase/response regulator-1	hk1	AACTTATGTG--TATTGGTTTT	lp5
T07TC023		Chrom	431572	Reverse	BB0420	Reverse	435103	430619	0.787244	sensory transduction histidine kinase/response regulator-1	hk1	TTAATGCCTA--TAACAACAAG	lp28-1
T08TC530		Chrom	431614	Reverse	BB0420	Reverse	435103	430619	0.777877	sensory transduction histidine kinase/response regulator-1	hk1	TTTACCTGAT--TATCTTCAGC	lp5
T11TC188		Chrom	431624	Forward	BB0420	Reverse	435103	430619	0.77587	sensory transduction histidine kinase/response regulator-1	hk1	TATCTTCAGC--TATTAAAACA	lp5
T05TC170		Chrom	431729	Forward	BB0420	Reverse	435103	430619	0.752453	sensory transduction histidine kinase/response regulator-1	hk1	GAATAGAGCA--TATACCAAGC	cp9
T05TC270		Chrom	431760	Reverse	BB0420	Reverse	435103	430619	0.745317	sensory transduction histidine kinase/response regulator-1	hk1	CTTTTTAACA--TAACCATATT	cp32-7,lp5
T09TC395		Chrom	431896	Reverse	BB0420	Reverse	435103	430619	0.714987	sensory transduction histidine kinase/response regulator-1	hk1	TTTACATTTA--TATAAACAAA	cp9	lp5
T11TC218	T11TC218, T11TC226	Chrom	431971	Forward	BB0420	Reverse	435103	430619	0.698483	sensory transduction histidine kinase/response regulator-1	hk1	TAGCGCACAT--TAGAAGAGCA	lp5
T10TC099		Chrom	432163	Reverse	BB0420	Reverse	435103	430619	0.655442	sensory transduction histidine kinase/response regulator-1	hk1	CCCACCTTGC--TATCAACAGC	lp5
T07TC089		Chrom	432379	Reverse	BB0420	Reverse	435103	430619	0.60727	sensory transduction histidine kinase/response regulator-1	hk1	GTTCTTGTTC--TACATACTTC	lp21,lp5
T04TC194		Chrom	432427	Forward	BB0420	Reverse	435103	430619	0.596789	sensory transduction histidine kinase/response regulator-1	hk1	TCTGTAAACT--TAAAAGCATT	cp9,lp28-2
T07TC521		Chrom	432487	Forward	BB0420	Reverse	435103	430619	0.583408	sensory transduction histidine kinase/response regulator-1	hk1	TCACCCTTTA--TATAATTATT		lp5
T07TC099		Chrom	432489	Forward	BB0420	Reverse	435103	430619	0.582962	sensory transduction histidine kinase/response regulator-1	hk1	ACCCTTTATA--TAATTATTAA	Complete
T09P01D01	T09P01D01, T09P01E01, T09P01E09, T09P02G02	Chrom	432587	Forward	BB0420	Reverse	435103	430619	0.561106	sensory transduction histidine kinase/response regulator-1	hk1	TTTCACTCTC--TAAATCAATC	Not done
T10TC433		Chrom	432659	Forward	BB0420	Reverse	435103	430619	0.545049	sensory transduction histidine kinase/response regulator-1	hk1	TATCATCAAT--TAAAGAAAGC	cp32-6,lp5
T07TC390		Chrom	432727	Reverse	BB0420	Reverse	435103	430619	0.529661	sensory transduction histidine kinase/response regulator-1		TCTGTAAGAA--TAGTTGTATC	Complete
T10TC436		Chrom	432758	Reverse	BB0420	Reverse	435103	430619	0.522748	sensory transduction histidine kinase/response regulator-1	hk1	TAGCCGCCAT--TATTCCGTTA	lp21
T07TC348		Chrom	432947	Reverse	BB0420	Reverse	435103	430619	0.480598	sensory transduction histidine kinase/response regulator-1	hk1	TAATGAATGT--TATCACTAAA	cp32-6
T07TC230		Chrom	432996	Forward	BB0420	Reverse	435103	430619	0.469893	sensory transduction histidine kinase/response regulator-1	hk1	GGATTTATAA--TAAATATCAA	Complete
T08TC601		Chrom	433305	Reverse	BB0420	Reverse	435103	430619	0.400758	sensory transduction histidine kinase/response regulator-1	hk1	ATTTTTACTA--TATAAAAAAT	Complete
T11P01E04	T11P02D01, T11P01E04, T11P01E07, T11P01E09	Chrom	433342	Reverse	BB0420	Reverse	435103	430619	0.60727	sensory transduction histidine kinase/response regulator-1	hk1	TCTAAAGATC--TAGATGGAAG	Not done
T10TC477		Chrom	433403	Reverse	BB0420	Reverse	435103	430619	0.378903	sensory transduction histidine kinase/response regulator-1	hk1	AATTTAATTT--TATGTTGAAA	lp5
T05TC111		Chrom	433441	Reverse	BB0420	Reverse	435103	430619	0.370428	sensory transduction histidine kinase/response regulator-1	hk1	TCGGTTGCAT--TAGTATTTAG	lp38,lp5
T05TC541	same site:T05TC541, T09TC425	Chrom	433448	Reverse	BB0420	Reverse	435103	430619	0.368867	sensory transduction histidine kinase/response regulator-1	hk1	CATTAGTATT--TAGCATATCG	cp9
T05TC489	same site:T05TC489, T09TC413	Chrom	433490	Forward	BB0420	Reverse	435103	430619	0.359723	sensory transduction histidine kinase/response regulator-1	hk1	TTTTAAGATC--TAAACTGCTG	Complete
T08TC543		Chrom	433786	Reverse	BB0420	Reverse	435103	430619	0.293488	sensory transduction histidine kinase/response regulator-1	hk1	TCATCAAATA--TAGAATTGAG	cp9
T10TC449		Chrom	433990	Reverse	BB0420	Reverse	435103	430619	0.247993	sensory transduction histidine kinase/response regulator-1	hk1	ACAATATCTT--TATTCTTATT	lp5
T08TC562		Chrom	434097	Forward	BB0420	Reverse	435103	430619	0.224353	sensory transduction histidine kinase/response regulator-1	hk1	ATTAAGAGGA--TATATTGGCT	Complete
T07TC216		Chrom	434107	Forward	BB0420	Reverse	435103	430619	0.222123	sensory transduction histidine kinase/response regulator-1	hk1	TATATTGGCT--TACTTACTAC	lp5
T07TC234		Chrom	434197	Forward	BB0420	Reverse	435103	430619	0.202052	sensory transduction histidine kinase/response regulator-1	hk1	AATGATTTCT--TAATATCCTC	lp5
T05TC097		Chrom	434233	Forward	BB0420	Reverse	435103	430619	0.194023	sensory transduction histidine kinase/response regulator-1	hk1	AAAATAGGTT--TAAAGATATG	cp32-6,lp5
T05TC108		Chrom	434322	Reverse	BB0420	Reverse	435103	430619	0.173952	sensory transduction histidine kinase/response regulator-1	hk1	TAAAGGAGGA--TAATCATTAT	lp5
T07TC191	same site: T07TC191, T08TC529, T09TC485	Chrom	434329	Reverse	BB0420	Reverse	435103	430619	0.172391	sensory transduction histidine kinase/response regulator-1	hk1	GGATAATCAT--TATATAAACC	lp5
T09TC024		Chrom	434331	Forward	BB0420	Reverse	435103	430619	0.172168	sensory transduction histidine kinase/response regulator-1	hk1	ATAATCATTA--TATAAACCAA	lp38,lp5
T10TC335		Chrom	434368	Reverse	BB0420	Reverse	435103	430619	0.163693	sensory transduction histidine kinase/response regulator-1	hk1	TTAGCATTGC--TATCTAAAAA	cp32-6
T08TC357		Chrom	434441	Forward	BB0420	Reverse	435103	430619	0.147636	sensory transduction histidine kinase/response regulator-1	hk1	TCAAATTCTT--TACTATCTCA	lp5
T09TC030		Chrom	434464	Forward	BB0420	Reverse	435103	430619	0.142507	sensory transduction histidine kinase/response regulator-1	hk1	GCATTTCTAC--TAATAGCCAC	Complete
T10TC397		Chrom	434488	Forward	BB0420	Reverse	435103	430619	0.137154	sensory transduction histidine kinase/response regulator-1	hk1	TTTTTGATAC--TATAAAAAAC	Complete
T05TC554	same site: T05TC554, T06TC464	Chrom	434573	Reverse	BB0420	Reverse	435103	430619	0.117975	sensory transduction histidine kinase/response regulator-1	hk1	AATCACCATA--TATATAATCA	lp5
T04P01A08		Chrom	434674	Reverse	BB0420	Reverse	435103	430619	0.0956735	sensory transduction histidine kinase/response regulator-1	hk1	ATATCTTCA--TATATTGTAT	lp28-1,lp5
T09TC507	T09TC507, T09TC509	Chrom	434965	Forward	BB0420	Reverse	435103	430619	0.0307761	sensory transduction histidine kinase/response regulator-1	hk1	TATTCTCCTT--TATTATTCTT		lp5
T09TC071		Chrom	435278	Reverse	GBBBb5SF	0	435312	435201	0.297297	5S rRNA	5S rrlA	TTCGGAATGA--TAACAGGTGT	cp9
T09TC112		Chrom	435834	Reverse	GBBBb23SB	0	438263	435345	0.832077	23S rRNA	23S rrlA	GCCAGATCAC--TAAGACCTAC	lp5	cp9
T03TC029		Chrom	435871	Forward	GBBBb23SB	0	438263	435345	0.81974	23S rRNA	23S rrlA	TTGTCAGTCT--TACAGTTAAG	Complete
T06TC455	T06TC455, T06TC553	Chrom	436106	Reverse	GBBBb23SB	0	438263	435345	0.738862	23S rRNA	23S rrlA	ATCCTACACA--TATTTAATCA	Not done
T10TC052		Chrom	436474	Forward	GBBBb23SB	0	438263	435345	0.613091	23S rRNA	23S rrlA	CCTAATTGCT--TAGGTCGTAC	Complete
T08TC031		Chrom	436594	Forward	GBBBb23SB	0	438263	435345	0.571967	23S rRNA	23S rrlA	CGGTCCCTTA--TAGCCTAACC	Complete
T08TC337		Chrom	436635	Forward	GBBBb23SB	0	438263	435345	0.557916	23S rRNA	23S rrlA	CTTGACTACC--TACATTTCAT	lp5
T10TC068		Chrom	436796	Forward	GBBBb23SB	0	438263	435345	0.502742	23S rRNA	23S rrlA	GGTACGGGAA--TATTAACCCG		lp5
T05TC004		Chrom	438251	Forward	GBBBb23SB	0	438263	435345	0.00411241	23S rRNA	23S rrlA	CATAGACTCT--TATTACTTTG	lp5
T10TC333		Chrom	438315	Forward	GBBBb23SB	0	438263	435345	0.0178204	23S rRNA	23S rrlA	CAACATAAAA--TAATATATAT	lp5
T09TC445		Chrom	438335	Reverse	GBBBb23SB	0	438263	435345	0.0250171	23S rRNA	23S rrlA	CTTTGTTTAA--TACATGTCAA	Complete
T05TC361		Chrom	438347	Forward	GBBBb23SB	0	438263	435345	0.0287868	23S rRNA	23S rrlA	CATGTCAATA--TATATTTTAT	cp32-6	lp5
T11TC228		Chrom	439079	Forward	GBBBb23SD	0	441508	438590	0.832419	23S rRNA	23S rrlB	GCCAGATCAC--TAAGACCTAC	Complete
T03TC145		Chrom	439086	Forward	GBBBb23SD	0	441508	438590	0.830021	23S rRNA	23S rrlB	CACTAAGACC--TACTTTCGTA	lp5		may be either locus
T05TC449	T05TC449, T05TC479	Chrom	440434	Reverse	GBBBb23SD	0	441508	438590	0.367718	23S rRNA	23S rrlB	TTTGAGACCT--TAGCTGTTGG	cp32-6
T05TC187		Chrom	440571	Forward	GBBBb23SD	0	441508	438590	0.32111	23S rRNA	23S rrlB	ATTAGTGCTC--TACCTCTATT	lp5
T06TC448		Chrom	440585	Forward	GBBBb23SD	0	441508	438590	0.316313	23S rRNA	23S rrlB	TCTATTAAAC--TAAAATAAGG	Not done
T06TC259		Chrom	440789	Reverse	GBBBb23SD	0	441508	438590	0.246059	23S rRNA	23S rrlB	ATCGCCCTTT--TAAGACTCGC	lp28-1
T07TC439		Chrom	440933	Reverse	GBBBb23SD	0	441508	438590	0.19671	23S rRNA	23S rrlB	GTTTCAGTTC--TATTTCACTC	lp5		may be either locus
T07TC079		Chrom	441004	Forward	GBBBb23SD	0	441508	438590	0.172721	23S rRNA	23S rrlB	AGCTTTCTAG--TATTTAGCCT	cp9,lp21,lp5
T04TC386		Chrom	441146	Forward	GBBBb23SD	0	441508	438590	0.124058	23S rRNA	23S rrlB	ATTATTCTTC--TATATAAATA	lp5
T09TC307		Chrom	441154	Forward	GBBBb23SD	0	441508	438590	0.121316	23S rRNA	23S rrlB	TCTATATAAA--TATTTTGTAA	lp28-1
T09TC525		Chrom	441177	Forward	GBBBb23SD	0	441508	438590	0.113434	23S rRNA	23S rrlB	TTTTGCTTAT--TACAGACTAA	lp5
T08TC545		Chrom	442200	Forward	BB0421	Reverse	442552	441713	0.419547	haloacid dehalogenase-like hydrolase		TGCATTAGAA--TACCAAGTGT	Complete
T04TC140		Chrom	442344	Forward	BB0421	Reverse	442552	441713	0.247914	haloacid dehalogenase-like hydrolase		CGTTACAAGA--TAATTTTCAT	lp5
T04TC287		Chrom	442357	Reverse	BB0421	Reverse	442552	441713	0.231228	haloacid dehalogenase-like hydrolase		TTTTCATTAA--TACTAATTTC	Complete
T08TC655		Chrom	442574	Reverse	IR BB0421-BB0422	0	442553	442687	0.164179	Intergenic Region	0	TCTTTTAAGA--TATACTATCA	Complete
T10TC015		Chrom	442576	Forward	IR BB0421-BB0422	0	442553	442687	0.171642	Intergenic Region	0	TTTTAAGATA--TACTATCACA		lp5
T08TC088		Chrom	442588	Forward	IR BB0421-BB0422	0	442553	442687	0.261194	Intergenic Region	0	CTATCACAAA--TAATTTATTC	lp5
T06TC280		Chrom	442644	Forward	IR BB0421-BB0422	0	442553	442687	0.679104	Intergenic Region	0	TTAATAATAT--TATATTTTTT	lp21
T07TC125		Chrom	442790	Reverse	BB0422	Reverse	443248	442688	0.816071	DNA-3-methyladenine glycosylase	mag	TTGAACAAAC--TATATTAAAA	cp9,lp28-1
T06TC244		Chrom	443010	Forward	BB0422	Reverse	443248	442688	0.425	DNA-3-methyladenine glycosylase	mag	GTTAAACATA--TAATGCATAC	lp28-1
T07TC140		Chrom	443027	Forward	BB0422	Reverse	443248	442688	0.394643	DNA-3-methyladenine glycosylase	mag	TACCATATAT--TATATACACA	cp9,lp28-1
T06TC076		Chrom	443029	Reverse	BB0422	Reverse	443248	442688	0.389286	DNA-3-methyladenine glycosylase	mag	CCATATATTA--TATACACATA	cp32-4
T05TC485		Chrom	443218	Reverse	BB0422	Reverse	443248	442688	0.0517857	DNA-3-methyladenine glycosylase	mag	GCAACGGTAG--TAGCATCTTG	lp21
T08TC331		Chrom	443740	Forward	IR BBtRNA-Ile-1-BB0423	0	443697	443762	0.661538	Intergenic Region	0	TTTTAAGCTA--TAATTAATAA	Complete
T08P01D06	T08P01D06, T08P02F01	Chrom	446256	Forward	IR BB0425-BB0426	0	446206	446326	0.416667	Intergenic Region	0	ATATTGTCAA--TACCTTTGCA	Not done
T05TC074		Chrom	446899	Reverse	IR BB0426-BB0427	0	446891	446968	0.116883	Intergenic Region	0	AAAATTCAAG--TATAACACAA	cp9,lp21,lp17,lp28-2,lp5	cp32-8
T06TC482		Chrom	448243	Forward	BB0429	Reverse	448591	448202	0.894602	conserved hypothetical protein		ATCATATACT--TATAAACCTC		lp28-1
T04TC151		Chrom	449128	Reverse	BB0430	Forward	448705	449310	0.700826	conserved hypothetical protein		AAATTTAACT--TACAACCAAT		lp5
T06TC141		Chrom	449738	Reverse	BB0431	Forward	449419	450171	0.425532	CobQ/CobB/MinD/ParA nucleotide binding domain, putative		AAAAATGCAT--TAACACTGTA	lp5
T08TC023		Chrom	449900	Reverse	BB0431	Forward	449419	450171	0.640957	CobQ/CobB/MinD/ParA nucleotide binding domain, putative		ATAGATACAA--TAACTACTGT	lp5
T06TC139		Chrom	449959	Forward	BB0431	Forward	449419	450171	0.718085	CobQ/CobB/MinD/ParA nucleotide binding domain, putative		TATAAATAAA--TACGACATAA		cp9
T08TC269		Chrom	450053	Forward	BB0431	Forward	449419	450171	0.843085	CobQ/CobB/MinD/ParA nucleotide binding domain, putative		AGGAAAAATA--TAACTATCTC	lp5
T11TC469		Chrom	450089	Forward	BB0431	Forward	449419	450171	0.890957	CobQ/CobB/MinD/ParA nucleotide binding domain, putative		AAAATGCCTG--TATATGAATA	Not done
T06TC166		Chrom	450149	Forward	BB0431	Forward	449419	450171	0.970745	CobQ/CobB/MinD/ParA nucleotide binding domain, putative		TCAAAAGAGA--TAATAAACAA	lp5	cp9
T08TC228		Chrom	450299	Reverse	BB0432	Forward	450174	450887	0.176718	conserved hypothetical protein		TTGACTACAA--TAAGCTAGAT	cp32-6,cp9,lp5
T05TC340		Chrom	450748	Forward	BB0432	Forward	450174	450887	0.805049	conserved hypothetical protein		AAAGAAGTAT--TAGATTTTAT	lp28-1
T04TC385		Chrom	450979	Reverse	BB0433	Reverse	451070	450972	0.918367	conserved hypothetical protein		TAACTACAAA--TAACAAAATA	lp5
T07TC193		Chrom	451234	Forward	BB0434	Reverse	451921	451139	0.878517	stage 0 sporulation protein J	spo0J	TTCCCTTTGA--TATCTATTTT	lp5
T08TC159		Chrom	451432	Forward	BB0434	Reverse	451921	451139	0.62532	stage 0 sporulation protein J	spo0J	AAGGATAAAA--TAACTTTAGC	Complete
T05TC456		Chrom	451579	Forward	BB0434	Reverse	451921	451139	0.43734	stage 0 sporulation protein J	spo0J	AACGAATATT--TATTCATTAT	cp9
T08TC454		Chrom	451765	Forward	BB0434	Reverse	451921	451139	0.199488	stage 0 sporulation protein J	spo0J	ATTTTATATC--TATCATTTGC	Complete
T08TC243		Chrom	451879	Reverse	BB0434	Reverse	451921	451139	0.0524297	stage 0 sporulation protein J	spo0J	TCATTATCAA--TATCTAAAAG	cp32-7,lp38
T08TC441		Chrom	456530	Forward	IR BB0436-BB0437	0	456404	456575	0.736842	Intergenic Region	0	AACATTATAC--TATATAATGT	Complete
T06TC119		Chrom	459643	Forward	BB0439	Forward	459525	459824	0.394649	conserved hypothetical protein		TGGAATCAGA--TATTTGAGGC		cp9
T07TC334		Chrom	465290	Reverse	IR BB0445-BB0446	0	465133	465517	0.411458	Intergenic Region	0	ACCTGAATAA--TAGATTAATT	Complete
T10TC030		Chrom	467642	Reverse	BB0447	Reverse	469387	467282	0.828504	Na+/H+ antiporter	napA	GCTCTCTTAT--TACATCAGCC	Complete
T07TC241		Chrom	468035	Reverse	BB0447	Reverse	469387	467282	0.641805	Na+/H+ antiporter	napA	ATTCAAATGA--TACGCATATG	lp5
T05TC245		Chrom	468329	Reverse	BB0447	Reverse	469387	467282	0.502138	Na+/H+ antiporter	napA	TAATTATTGC--TATTGCGCTA	cp32-3,lp5
T08TC009		Chrom	468563	Forward	BB0447	Reverse	469387	467282	0.391449	Na+/H+ antiporter	napA	TAGTAAGGGC--TAGAGAGAGC	cp9,lp5
T05TC045		Chrom	469412	Forward	BB0448	Reverse	469665	469390	0.92	phosphocarrier protein HPr	ptsH-1	TGAAAAATTA--TATTTTAGCA	Complete
T11TC264		Chrom	469488	Reverse	BB0448	Reverse	469665	469390	0.64	phosphocarrier protein HPr	ptsH-1	ATTTTTTCTT--TGTATATTAT	lp5		anomolous transposition event
T07TC346		Chrom	469777	Reverse	BB0449	Reverse	469971	469678	0.658703	conserved hypothetical protein		CATCTTCTCT--TATATGTATT	cp9,lp21,lp5
T03TC219		Chrom	470341	Reverse	BB0450	Reverse	471220	469961	0.697379	RNA polymerase sigma-54 factor	rpoN	AATGTATATA--TAGCTATTCC	lp5
T10TC045	T10TC045, T10TC355	Chrom	470345	Reverse	BB0450	Reverse	471220	469961	0.694202	RNA polymerase sigma-54 factor	rpoN	TATATATAGC--TATTCCTATT	lp5
T10TC025		Chrom	470962	Reverse	BB0450	Reverse	471220	469961	0.20413	RNA polymerase sigma-54 factor	rpoN	TTTAAAGAAG--TATTTGTTTG	cp9,lp5
T08TC153		Chrom	476096	Forward	BB0456	Forward	475606	476211	0.809917	conserved hypothetical protein		TTTTTTAGAG--TAGTTAAGAG	lp21,lp38
T05TC116		Chrom	477018	Reverse	BB0457	Reverse	478074	476263	0.582551	excinuclease ABC, subunit C	uvrC	AATTCAGCAT--TAGATATGGC	lp28-2
T07TC408		Chrom	477584	Reverse	BB0457	Reverse	478074	476263	0.270017	excinuclease ABC, subunit C	uvrC	CATATGGTAA--TATAGGCAAG		lp5
T10TC161		Chrom	477982	Forward	BB0457	Reverse	478074	476263	0.0508007	excinuclease ABC, subunit C	uvrC	CAATATAGAG--TATTTTTTTA	cp9,lp21,lp5
T10TC160		Chrom	479483	Reverse	BB0458	Forward	478139	479716	0.852885	fibronectin type III domain protein		TGAGGGGTAT--TACATTTATA	cp9,lp5
T07TC227		Chrom	480438	Reverse	BB0459	Forward	479709	481019	0.557252	tetratricopeptide repeat domain protein		CACAACATCT--TATGTTAAAG	Complete
T08TC082		Chrom	480467	Reverse	BB0459	Forward	479709	481019	0.579389	tetratricopeptide repeat domain protein		ATTTTCCTAA--TATTTATACG	Complete
T10TC064		Chrom	480592	Reverse	BB0459	Forward	479709	481019	0.674809	tetratricopeptide repeat domain protein		TATGCAACCT--TATTTTTTCT	Complete
T08TC476		Chrom	481492	Reverse	BB0460	Reverse	482057	481344	0.791024	lipoprotein, putative		TTTAAAATAA--TATTTATATC	cp9,lp5
T09TC111		Chrom	481498	Forward	BB0460	Reverse	482057	481344	0.784011	lipoprotein, putative		ATAATATTTA--TATCTTGGAA	lp5
T04TC344		Chrom	481556	Forward	BB0460	Reverse	482057	481344	0.702665	lipoprotein, putative		TGTTTTCCTT--TAACATAAAA	lp28-1
T08TC631		Chrom	484337	Forward	BB0462	Forward	484254	484586	0.25	putative DNA-binding protein	ebfC	GCGTTAAGAA--TAATATTGAC		lp5
T06TC358		Chrom	484720	Reverse	IR BB0462-BB0463	0	484587	484756	0.792899	Intergenic Region	0	TTTATTTAAT--TATTTTTAAA	cp9,lp5
T09TC052		Chrom	484782	Reverse	BB0463	Forward	484757	485266	0.0510806	nucleoside-diphosphate kinase	ndk	CAAAAAACTT--TATGTATTGT	lp38,lp5
T08TC233		Chrom	484837	Reverse	BB0463	Forward	484757	485266	0.159136	nucleoside-diphosphate kinase	ndk	ATGTAGTTTC--TAGATTTGAA	cp9,lp5
T05TC180		Chrom	484917	Reverse	BB0463	Forward	484757	485266	0.316306	nucleoside-diphosphate kinase	ndk	AAACATTATT--TATATGATGA	cp9,lp5
T11TC547		Chrom	485255	Forward	BB0463	Forward	484757	485266	0.978389	nucleoside-diphosphate kinase	ndk	ATGTGAGCAT--TATTATTGTT	Not done
T09P01B12	T09P01B12, T09P02A02	Chrom	485279	Forward	IR BB0463-BB0464	0	485267	485549	0.0425532	Intergenic Region	0	TTTATAAGTC--TATCTCTTAA	Not done
T11TC365		Chrom	485313	Reverse	IR BB0463-BB0464	0	485267	485549	0.166667	Intergenic Region	0	AAATTACCCT--TATGTTATTC	Not done
T03TC103		Chrom	492228	Reverse	IR BB0472-BB0473	0	491927	490599	0.226316	Intergenic Region	0	TTTTTATTTT--TATAATATTA	Complete		Revised 5' end to match GenBank NC_001318.1 (110513)
T06TC517		Chrom	492322	Reverse	IR BB0472-BB0473	0	491927	490599	0.296992	Intergenic Region	0	TATTTATGAT--TAGTATTAGA	Not done		Revised 5' end to match GenBank NC_001318.1 (110513)
T04TC218	same site: T04TC218, T09TC001	Chrom	493861	Reverse	BB0473	Forward	492588	493952	0.934018	conserved hypothetical integral membrane protein		TATGCTTTTA--TAATTTCAAA	cp9
T03TC175		Chrom	493891	Reverse	BB0473	Forward	492588	493952	0.956012	conserved hypothetical integral membrane protein		ATTATAATTT--TAATTGCTTT	lp21,lp5
T04TC295		Chrom	494480	Reverse	BB0475	Reverse	494542	494150	0.155612	lipoprotein, putative		TAAAAACAAT--TAAAATGCCA	lp21
T03TC305		Chrom	494781	Forward	IR BB0475-BB0476	0	494543	495033	0.488753	Intergenic Region	0	TTAATGCTAT--TATATGTGTA	lp5		Revised 3' end to match GenBank NC_001318.1 (110513)
T07TC100		Chrom	510844	Forward	BB0505	Forward	510836	511624	0.0101523	conserved hypothetical protein		ATATGCAAGA--TAGCACTATT	lp21,lp5
T09P02A03		Chrom	511063	Forward	BB0505	Forward	510836	511624	0.288071	conserved hypothetical protein		ATGTGTATTC--TAATTGCAAA	cp32-6,cp9
T09TC344		Chrom	511082	Forward	BB0505	Forward	510836	511624	0.312183	conserved hypothetical protein		AATAAATGAT--TACCTAAATA		lp5
T10P01A03	T10P01A03, T10P01A07, T10P01A08, T10P01A09, T10P01A10, T10P01A11, T10P01E04, T10P01E07, T10P01F03, T10P01F06, T10P02A05; same site T05TC337	Chrom	511100	Forward	BB0505	Forward	510836	511624	0.335025	conserved hypothetical protein		TAAGCAAACA--TATATCTTAA	Not done
T11P01G01		Chrom	511102	Forward	BB0505	Forward	510836	511624	0.337563	conserved hypothetical protein		AGCAAACATA--TATCTTAAGG	lp21,lp5	cp9
T10TC508		Chrom	511206	Forward	BB0505	Forward	510836	511624	0.469543	conserved hypothetical protein		CAAGGGGTTT--TAAATATGAA		lp5
T05TC386		Chrom	511387	Forward	BB0505	Forward	510836	511624	0.699239	conserved hypothetical protein		ATACCCATGT--TATGACTCAA	cp32-7	lp5
T10P01A12	T10P01A12, T10P01B05, T10P01B10, T10P01C02, T10P01E11, T10P01H05, T10P02H05	Chrom	511427	Reverse	BB0505	Forward	510836	511624	0.751269	conserved hypothetical protein		GGGGACAGCC--TATATTAGTG	Not done
T06TC290		Chrom	511429	Forward	BB0505	Forward	510836	511624	0.752538	conserved hypothetical protein		GGACAGCCTA--TATTAGTGAT	Complete
T03TC017		Chrom	511503	Reverse	BB0505	Forward	510836	511624	0.847716	conserved hypothetical protein		CTTAAGGGCT--TACTTGAATA	lp21,lp28-1
T09TC356		Chrom	511690	Reverse	BB0506	Forward	511605	512396	0.108723	ribosomal RNA large subunit methyltransferase J	tlyA	ATCTTAATTC--TAAAAGGCAA		lp5
T03TC211	T03TC211, T03TC289	Chrom	511702	Reverse	BB0506	Forward	511605	512396	0.123894	ribosomal RNA large subunit methyltransferase J	tlyA	AAAGGCAATA--TATATGTAAA	lp5	lp28-1
T06TC165		Chrom	511704	Forward	BB0506	Forward	511605	512396	0.125158	ribosomal RNA large subunit methyltransferase J	tlyA	AGGCAATATA--TATGTAAATT	lp5
T10TC372		Chrom	511708	Reverse	BB0506	Forward	511605	512396	0.131479	ribosomal RNA large subunit methyltransferase J	tlyA	AATATATATG--TAAATTCTCA		lp5
T10TC317		Chrom	511738	Reverse	BB0506	Forward	511605	512396	0.169406	ribosomal RNA large subunit methyltransferase J	tlyA	AATCCTAAAA--TATTAATAAA	lp28-1
T10TC409		Chrom	512033	Forward	BB0506	Forward	511605	512396	0.541087	ribosomal RNA large subunit methyltransferase J	tlyA	TTACAGAATT--TAAGATTGTT	lp5
T07TC363		Chrom	512087	Reverse	BB0506	Forward	511605	512396	0.610619	ribosomal RNA large subunit methyltransferase J	tlyA	CATCAATAAG--TATATGTGTA	Complete
T07TC113		Chrom	512281	Reverse	BB0506	Forward	511605	512396	0.855879	ribosomal RNA large subunit methyltransferase J	tlyA	AAAAAGATAT--TAAAGTTAAA	lp28-2,lp5
T08P01A05	T08P01F02, T08P01A05	Chrom	512336	Reverse	BB0506	Forward	511605	512396	0.924147	ribosomal RNA large subunit methyltransferase J	tlyA	TTTTAGTTGT--TAAGTCAAGT	cp9,lp21
T11TC301		Chrom	527481	Reverse	BB0516	Reverse	528047	527361	0.823615	RNA methyltransferase, TrmH family, group 3	yacO	AATTTTCTTT--TATTAGCTTA	Not done
T07TC114		Chrom	527723	Reverse	BB0516	Reverse	528047	527361	0.470845	RNA methyltransferase, TrmH family, group 3	yacO	TTTTGAGTAG--TAATTACAAG	lp5
T08P01H02		Chrom	527736	Reverse	BB0516	Reverse	528047	527361	0.451895	RNA methyltransferase, TrmH family, group 3	yacO	TTACAAGATC--TATACTAAAC	Not done
T09TC135		Chrom	528036	Reverse	BB0516	Reverse	528047	527361	0.0145773	RNA methyltransferase, TrmH family, group 3	yacO	TTTTTTGATA--TATAAAGTTC	lp5		Genomic sequence error - T at 528031 should not be there
T08TC339		Chrom	528038	Forward	BB0516	Reverse	528047	527361	0.0131195	RNA methyltransferase, TrmH family, group 3	yacO	TTTTGATATA--TAAAGTTCAA	lp28-1,lp5
T05TC467		Chrom	528102	Forward	IR BB0516-BB0517	0	528048	528103	0.981818	Intergenic Region	0	GTTATATACA--TATTATGCTT	cp9,lp5
T06TC442		Chrom	531908	Forward	BB0520	Reverse	531967	531851	0.508621	hypothetical protein		TTTTTTTATT--TATAAGAATA	cp9, lp28-1	lp5
T04TC403		Chrom	533599	Forward	BB0522	Forward	532938	533606	0.992504	NH(3)-dependent NAD+ synthetase		TTAAATAATA--TAATTTGAAA	lp28-1		Changed 5' end to match GenBank NC_001318 (110513)
T03TC068		Chrom	533657	Forward	IR BB0522-BB0523	0	533607	533979	0.134409	Intergenic Region	0	TTTTAAATTT--TATTAATAAT	lp5
T06TC275		Chrom	533788	Forward	IR BB0522-BB0523	0	533607	533979	0.486559	Intergenic Region	0	TTTCTTAGTG--TATTAATATT	cp9,lp5
T07TC040		Chrom	534279	Forward	IR BB0523-BB0524	0	534073	534300	0.907489	Intergenic Region	0	AATTTATTAT--TAATAAGAGA	cp9
T07TC483		Chrom	535050	Reverse	BB0524	Forward	534301	535155	0.87822	inositol monophosphatase		TTTTAGAGCC--TAATAATCAT	lp5
T08TC223		Chrom	535153	Reverse	BB0524	Forward	534301	535155	0.998829	inositol monophosphatase		AATCAATAAG--TAAGGTATAA	cp9,lp5
T07TC091		Chrom	538284	Forward	BB0527	Forward	537520	538308	0.969543	transcriptional activator, putative, Baf family		TAGGAAATTC--TATTGACTTT	Complete
T05TC229		Chrom	538409	Forward	BB0528	Reverse	539275	538328	0.914467	aldose reductase, putative		TCTCTTCATA--TACTTTATCA	cp9
T07TC320		Chrom	538937	Forward	BB0528	Reverse	539275	538328	0.356917	aldose reductase, putative		TAGGCCAGTG--TATATAGTAA	cp32-6,cp9
T04TC444		Chrom	538952	Forward	BB0528	Reverse	539275	538328	0.341077	aldose reductase, putative		AGTAAATATC--TATATAATCA	cp9,lp28-1
T06TC573		Chrom	539370	Forward	BB0530	Reverse	540020	539367	0.995406	conserved hypothetical protein		TAAAATTTTA--TAGTTTGTTA	Not done
T05TC257		Chrom	539537	Forward	BB0530	Reverse	540020	539367	0.739663	conserved hypothetical protein		TCTTTGATTT--TAAATAGTTT	cp9
T10TC197		Chrom	539757	Reverse	BB0530	Reverse	540020	539367	0.401225	conserved hypothetical protein		TTAATTCATC--TATGCTAAGT	lp21,lp5
T10TC041		Chrom	539762	Forward	BB0530	Reverse	540020	539367	0.3951	conserved hypothetical protein		TCATCTATGC--TAAGTATAAA	lp28-1,lp5
T07TC261		Chrom	539788	Reverse	BB0530	Reverse	540020	539367	0.353752	conserved hypothetical protein		GTTTTTATAA--TAAATACTGT	lp28-1,lp5
T09TC241		Chrom	540126	Reverse	IR BB0530-BB0531	0	540021	540158	0.773723	Intergenic Region	0	GTATTTTGAA--TATATCTTTT	lp28-1,lp5
T03TC181		Chrom	540722	Forward	BB0531	Reverse	540773	540159	0.0830619	conserved hypothetical protein		CTATGAGCTT--TATTTGTTAA	cp9,lp5
T04TC155		Chrom	541211	Forward	BB0532	Reverse	542069	541182	0.967306	conserved hypothetical protein		TCAGTTTCAG--TAGATGCAAT	Complete
T11TC466		Chrom	541491	Forward	BB0532	Reverse	542069	541182	0.651635	conserved hypothetical protein		CTTTTTTATA--TATGTTATTC	lp5
T10TC034		Chrom	544921	Forward	BB0536	Forward	544586	547387	0.1196	zinc protease, putative		GTGCTGACAT--TAATGCTGCT	lp5
T10P01G02		Chrom	545431	Reverse	BB0536	Forward	544586	547387	0.302035	zinc protease, putative		TTGGAGAGCC--TAGTTTAATG	Not done
T10TC270		Chrom	546409	Forward	BB0536	Forward	544586	547387	0.650839	zinc protease, putative		AAGAATCATA--TATTTCTGGA	cp9,lp28-1,lp5
T07TC157		Chrom	546560	Forward	BB0536	Forward	544586	547387	0.704748	zinc protease, putative		TAGTTCTGAT--TATCATTTTC	cp9,lp5
T06TC328		Chrom	546797	Reverse	BB0536	Forward	544586	547387	0.789718	zinc protease, putative		AATAAACGAG--TATAAAGATT	Complete
T07TC292		Chrom	546909	Forward	BB0536	Forward	544586	547387	0.829347	zinc protease, putative		TTTAATTATT--TAGCAGAGAC	lp5
T06TC462		Chrom	547072	Forward	BB0536	Forward	544586	547387	0.88754	zinc protease, putative		CTATTTTTTT--TACTACCGAG	Not done
T11TC136		Chrom	548299	Forward	BB0537	Reverse	548490	547846	0.296584	tetratricopeptide repeat domain protein		TCCATATCAA--TATTGTCCTA	lp21
T08TC134		Chrom	552068	Reverse	BB0541	Forward	552007	552225	0.284404	hypothetical protein		ATATCACAAG--TAGATTACGA	cp9,lp28-1,lp5
T07TC489		Chrom	552156	Reverse	BB0541	Forward	552007	552225	0.688073	hypothetical protein		CAAGACATTT--TAGCGCAATA	lp28-1,lp5
T05TC330		Chrom	553009	Forward	BB0542	Forward	552440	553018	0.984429	tetratricopeptide repeat domain protein		CTTCTATTCT--TAAGAGTTAA	cp32-7
T03TC312		Chrom	556559	Forward	BB0545	Forward	555216	556580	0.984604	xylulokinase	xylB	TTAATAATTA--TAGTCTATTT	lp28-1
T09TC390		Chrom	562116	Forward	IR BB0551-BB0552	0	561965	562184	0.689498	Intergenic Region	0	ACAGTTTGTA--TAGTAAAGTC		lp5
T05TC508		Chrom	564193	Reverse	BB0553	Reverse	565681	564188	0.995981	conserved hypothetical protein		TATTTTTATT--TAATTATTTT	lp5
T10TC101		Chrom	564542	Forward	BB0553	Reverse	565681	564188	0.762894	conserved hypothetical protein		TATTTTCTTC--TAGATCTCGG	lp21	cp32-8,lp5
T11TC473		Chrom	565489	Reverse	BB0553	Reverse	565681	564188	0.12793	conserved hypothetical protein		TCATAAGAAA--CTATGTTTTT	Not done		anomolous transposition event
[truncated: 3,045 more rows]
